# Supplementary material for: Synthesis and configuration of the nonadecenetriol isolated from seeds of Persea americana
Source: Royal Society of Chemistry journal article supplement (doi:10.1039/c1ob05898c), 2011-01-01
Supplement: c1ob05898c.pdf [file c1ob05898c.pdf]

*Electronic Supplementary Information*

**Synthesis and configuration of the nonadecenetriol isolated from seeds of *Persea Americana***

Xin Yan,<sup>a,b</sup> Shao-Min Zhang,<sup>a</sup> Yikang Wu\*<sup>a</sup> and Po Gao\*<sup>b</sup>

<sup>a</sup>State Key Laboratory of Bioorganic and Natural Products Chemistry, Shanghai Institute of Organic Chemistry, Chinese Academy of Sciences, 345 Lingling Road, Shanghai 200032, China

<sup>b</sup>School of Chemistry and Materials, Heilongjiang University, Harbin 150080, China.

e-mail: [yikangwu@sioc.ac.cn](mailto:yikangwu@sioc.ac.cn)

**Table of Contents**

|                                                                                                 |      |
|-------------------------------------------------------------------------------------------------|------|
| <sup>1</sup> H NMR, <sup>13</sup> C NMR and FT-IR for <b>2</b> .....                            | S 2  |
| <sup>1</sup> H NMR, <sup>13</sup> C NMR and FT-IR for <b>3</b> .....                            | S 5  |
| <sup>1</sup> H NMR, <sup>13</sup> C NMR and FT-IR for <b>7a</b> .....                           | S 8  |
| <sup>1</sup> H NMR, <sup>13</sup> C NMR and FT-IR for <b>7a'</b> .....                          | S 11 |
| <sup>1</sup> H NMR, <sup>13</sup> C NMR and FT-IR for <b>8</b> .....                            | S 14 |
| <sup>1</sup> H NMR, <sup>13</sup> C NMR and FT-IR for <b>9</b> .....                            | S 17 |
| <sup>1</sup> H NMR, <sup>13</sup> C NMR and FT-IR for <b>11</b> .....                           | S 20 |
| <sup>1</sup> H NMR, <sup>13</sup> C NMR and FT-IR for <b>12</b> .....                           | S 23 |
| <sup>1</sup> H NMR, <sup>13</sup> C NMR and FT-IR for <b>13</b> .....                           | S 26 |
| <sup>1</sup> H NMR, <sup>13</sup> C NMR and FT-IR for <b>13'</b> .....                          | S 29 |
| <sup>1</sup> H NMR, <sup>13</sup> C NMR and FT-IR for <b>14</b> .....                           | S 32 |
| <sup>1</sup> H NMR, <sup>13</sup> C NMR and FT-IR for <b>14'</b> .....                          | S 35 |
| <sup>1</sup> H NMR, <sup>13</sup> C NMR and FT-IR for <b>15</b> .....                           | S 38 |
| <sup>1</sup> H NMR, <sup>13</sup> C NMR and FT-IR for <b>16</b> .....                           | S 41 |
| <sup>1</sup> H NMR, <sup>13</sup> C NMR and FT-IR for <b>17</b> .....                           | S 44 |
| <sup>1</sup> H NMR and FT-IR for <b>17'</b> .....                                               | S 47 |
| <sup>1</sup> H NMR, <sup>13</sup> C NMR and FT-IR for <b>18</b> .....                           | S 49 |
| <sup>1</sup> H NMR, <sup>13</sup> C NMR and FT-IR for <b>19</b> .....                           | S 52 |
| <sup>1</sup> H NMR, <sup>13</sup> C NMR and FT-IR for <b>20</b> .....                           | S 55 |
| <sup>1</sup> H NMR, <sup>13</sup> C NMR and FT-IR for <b>21</b> .....                           | S 58 |
| <sup>1</sup> H NMR, <sup>13</sup> C NMR and FT-IR for <b>22</b> .....                           | S 61 |
| <sup>1</sup> H NMR, <sup>13</sup> C NMR and FT-IR for <b>23</b> .....                           | S 64 |
| <sup>1</sup> H NMR, <sup>13</sup> C NMR and FT-IR for <b>24</b> .....                           | S 67 |
| <sup>1</sup> H NMR, <sup>13</sup> C NMR and FT-IR for (2 <i>S</i> ,4 <i>R</i> )- <b>1</b> ..... | S 70 |
| <sup>1</sup> H NMR, <sup>13</sup> C NMR and FT-IR for (2 <i>S</i> ,4 <i>S</i> )- <b>1</b> ..... | S 73 |
| <sup>1</sup> H NMR, <sup>13</sup> C NMR and FT-IR for (2 <i>R</i> ,4 <i>R</i> )- <b>1</b> ..... | S 76 |
| Tabular NMR data comparison between nat- <b>1</b> and (2 <i>R</i> ,4 <i>R</i> )- <b>1</b> ..... | S 80 |

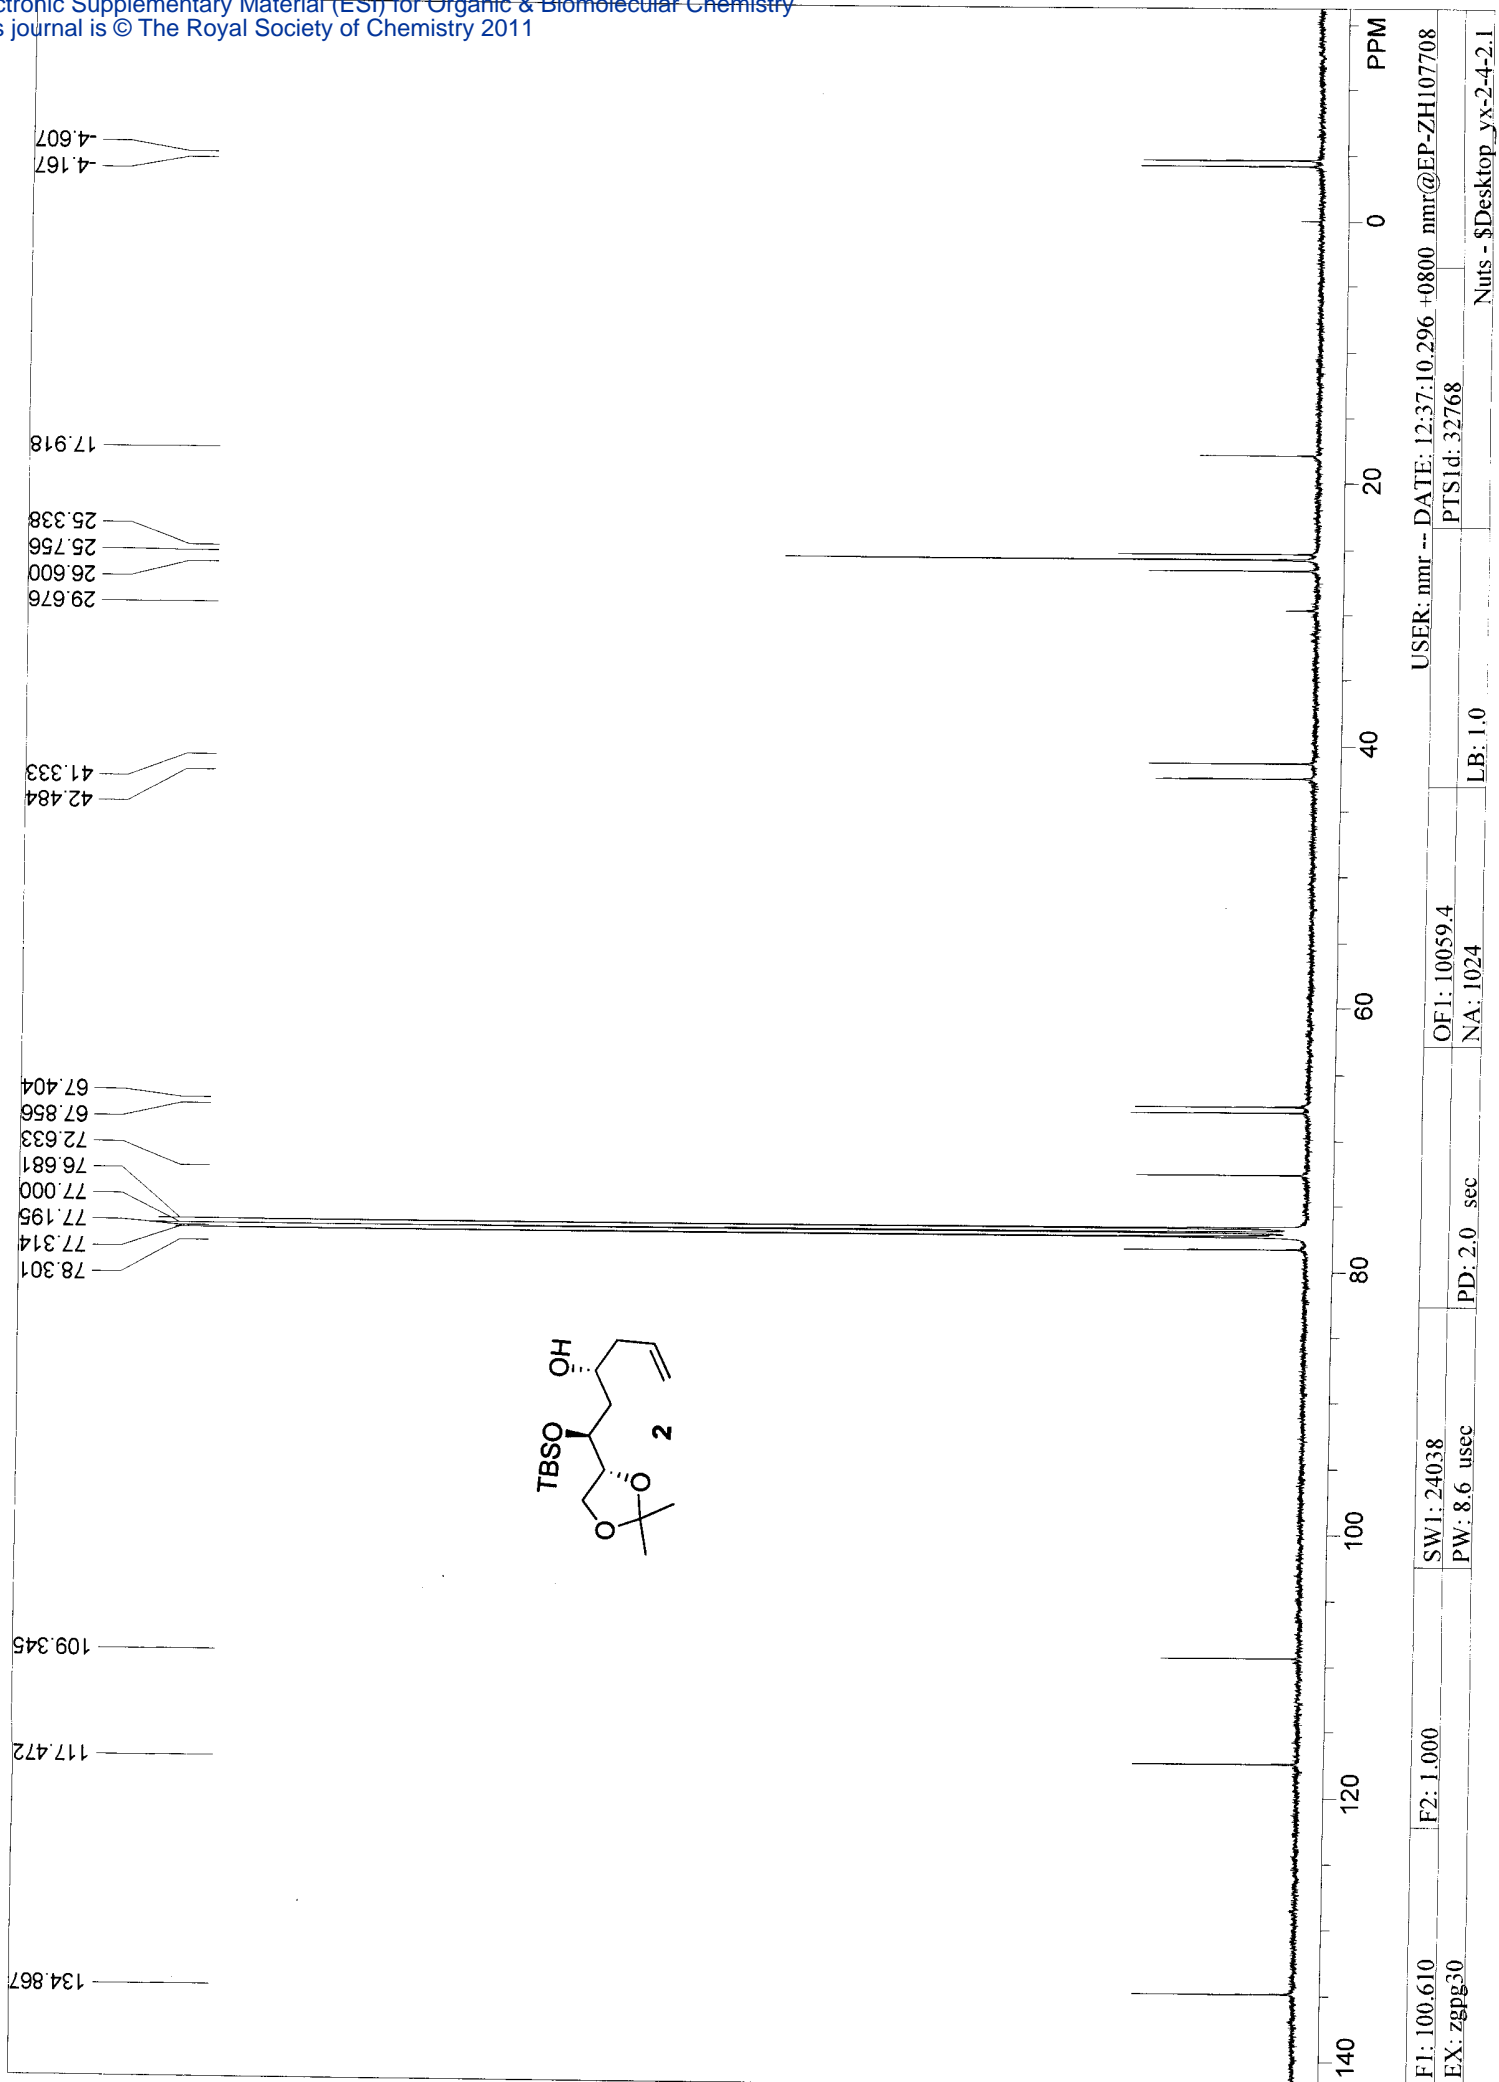

S 2

100 MHz, CDCl<sub>3</sub>

|             |           |              |              |                                                       |
|-------------|-----------|--------------|--------------|-------------------------------------------------------|
| F1: 100.610 | F2: 1.000 | SW1: 24038   | OF1: 10059.4 | USER: nmr -- DATE: 12:37:10,296 +0800 nmr@EP-ZH107708 |
| EX: zgpg30  |           | PW: 8.6 usec | NA: 1024     | PTSId: 32768                                          |
|             |           | PD: 2.0 sec  | LB: 1.0      | Nuts - \$Desktop_yx-2-4-2.1                           |

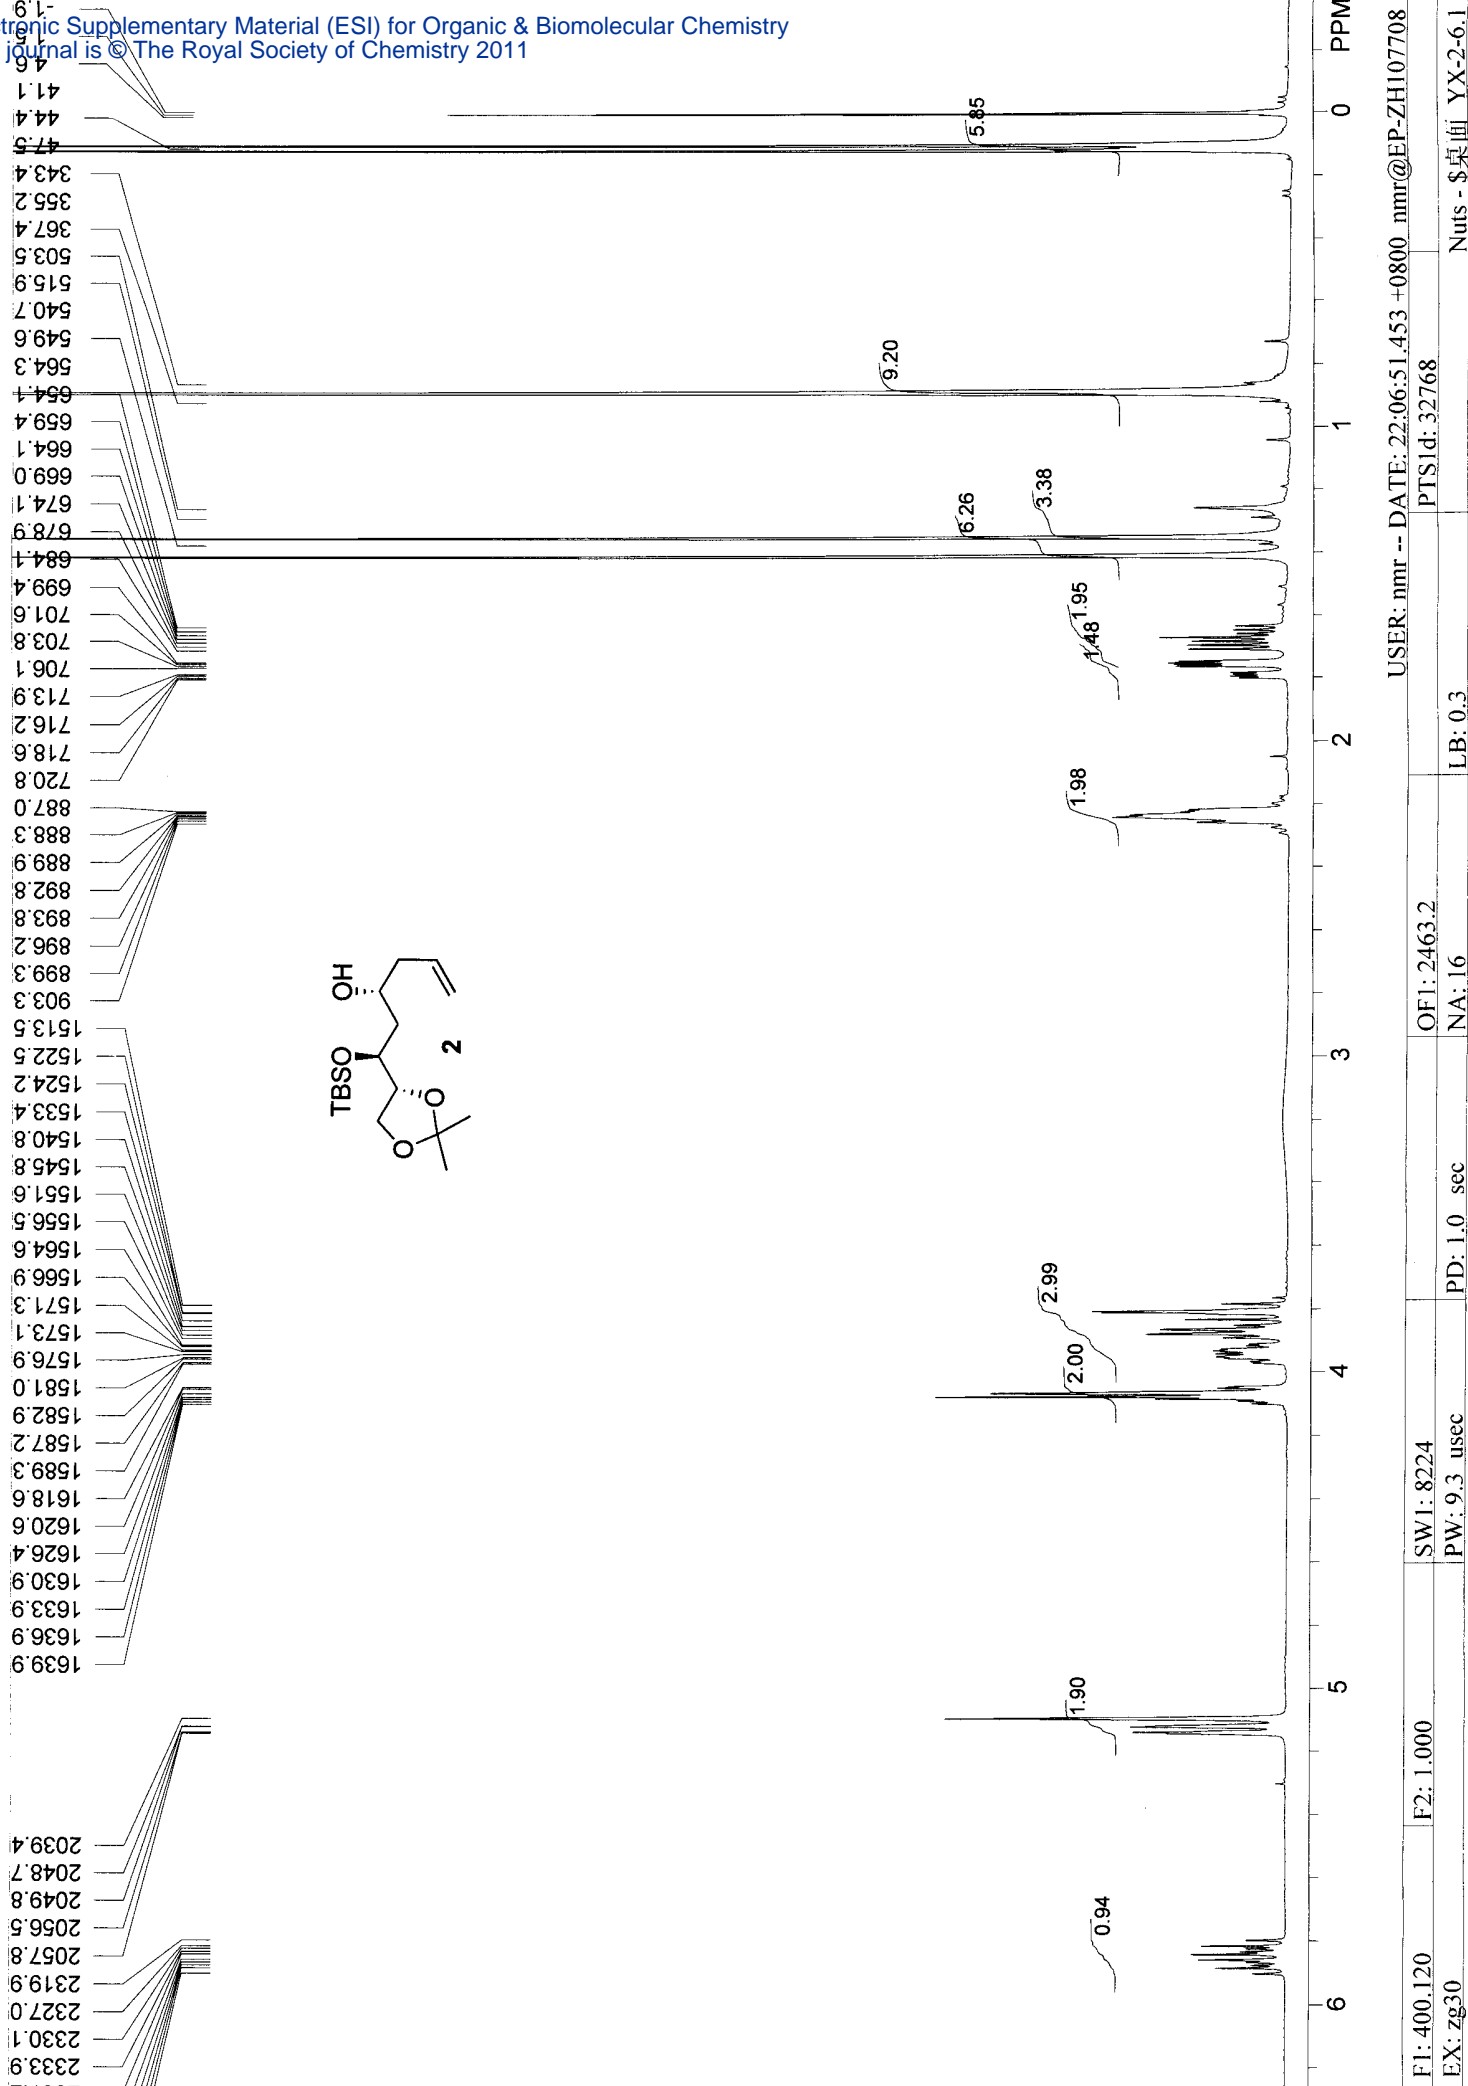

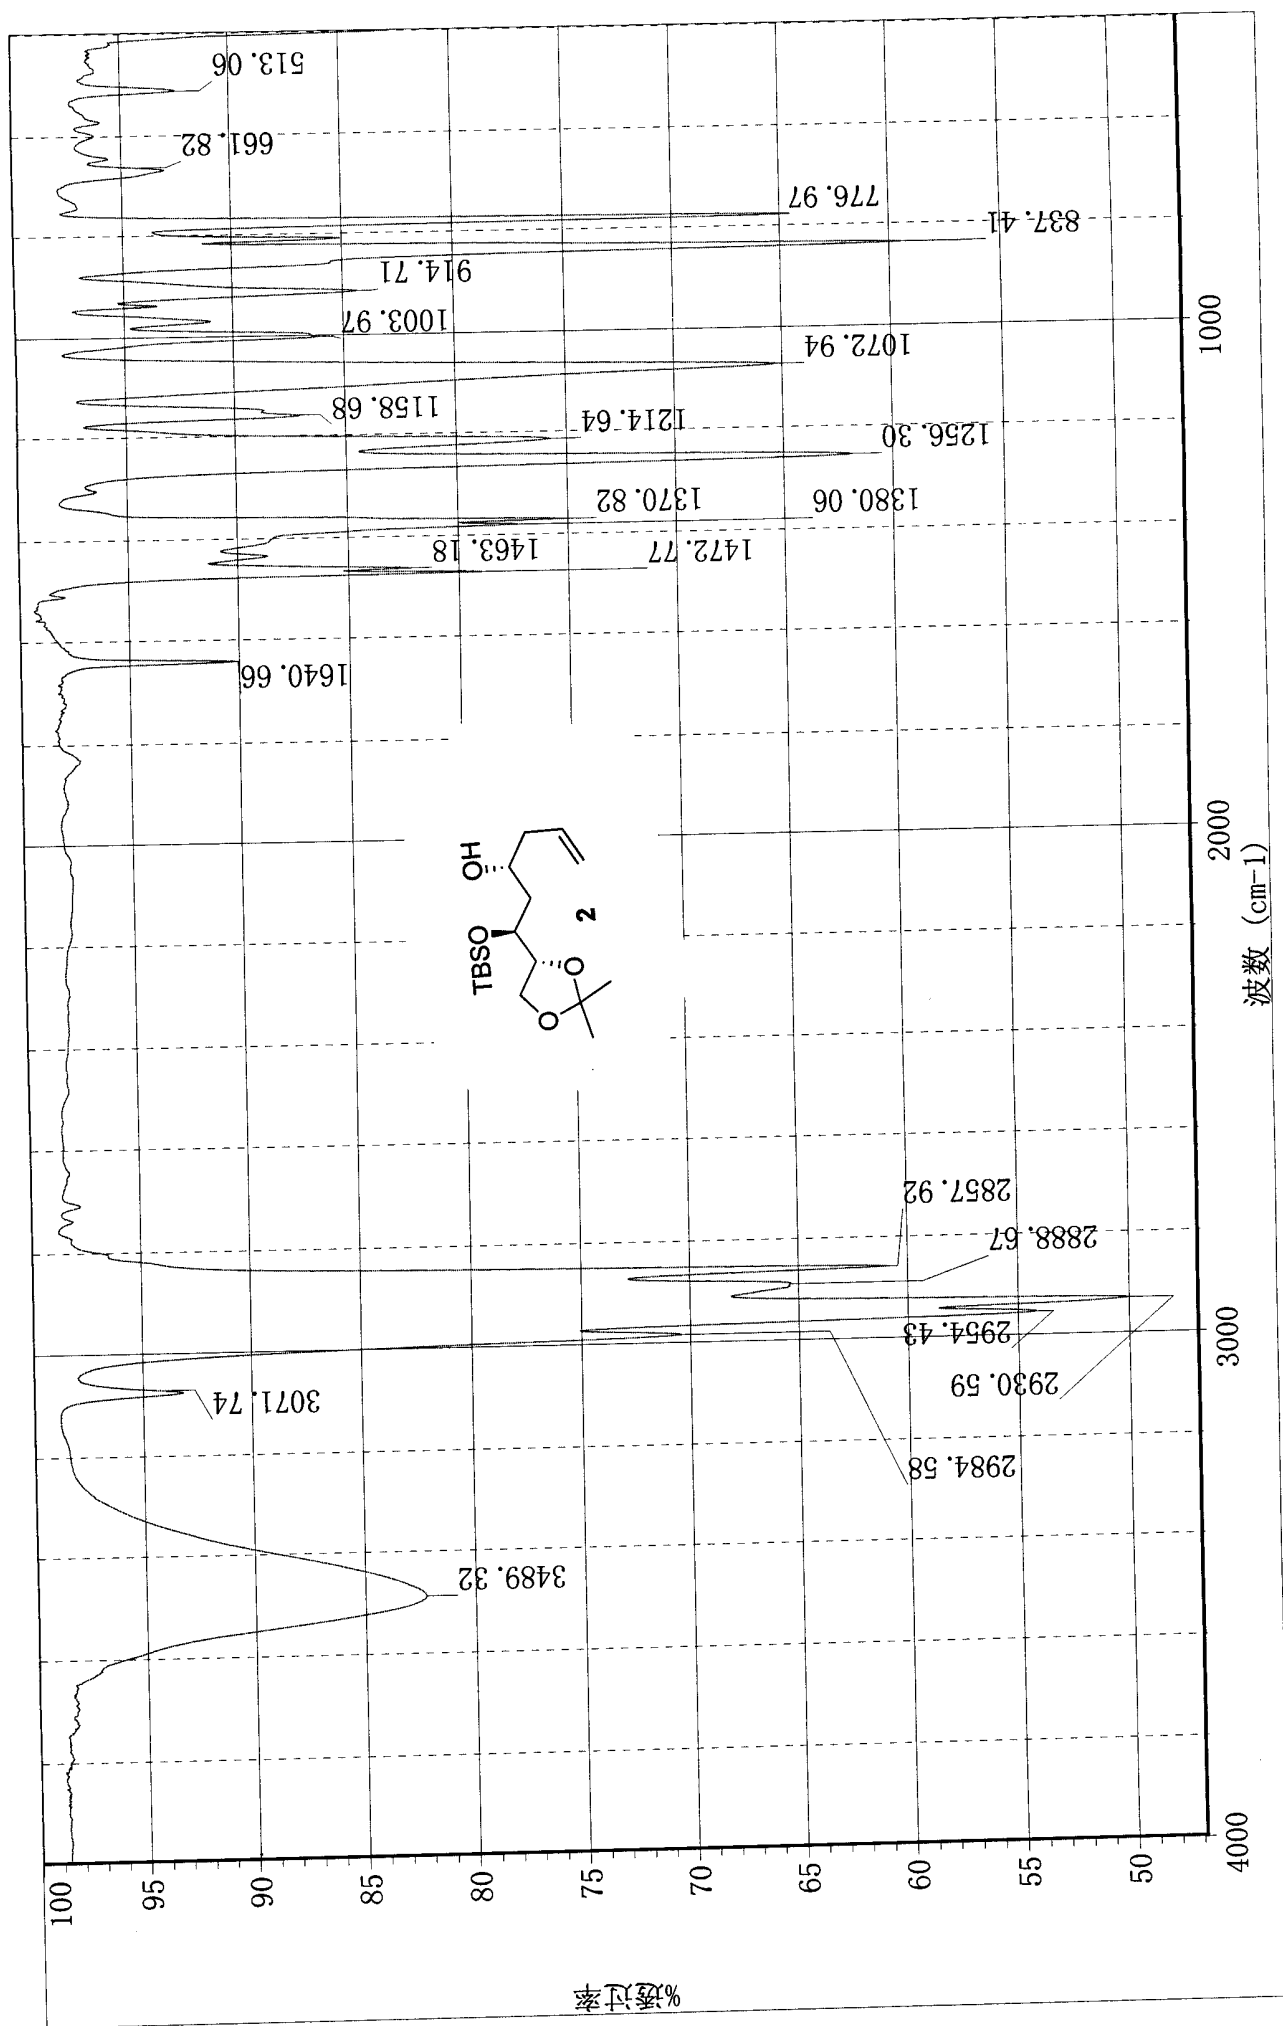

\*\*yx-2-13

采集时间: 星期一 2月 21 10:16:39 2011 (GMT+08:00)

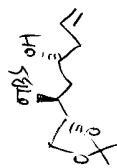

上海有机所生命有机化学国家重点实验室

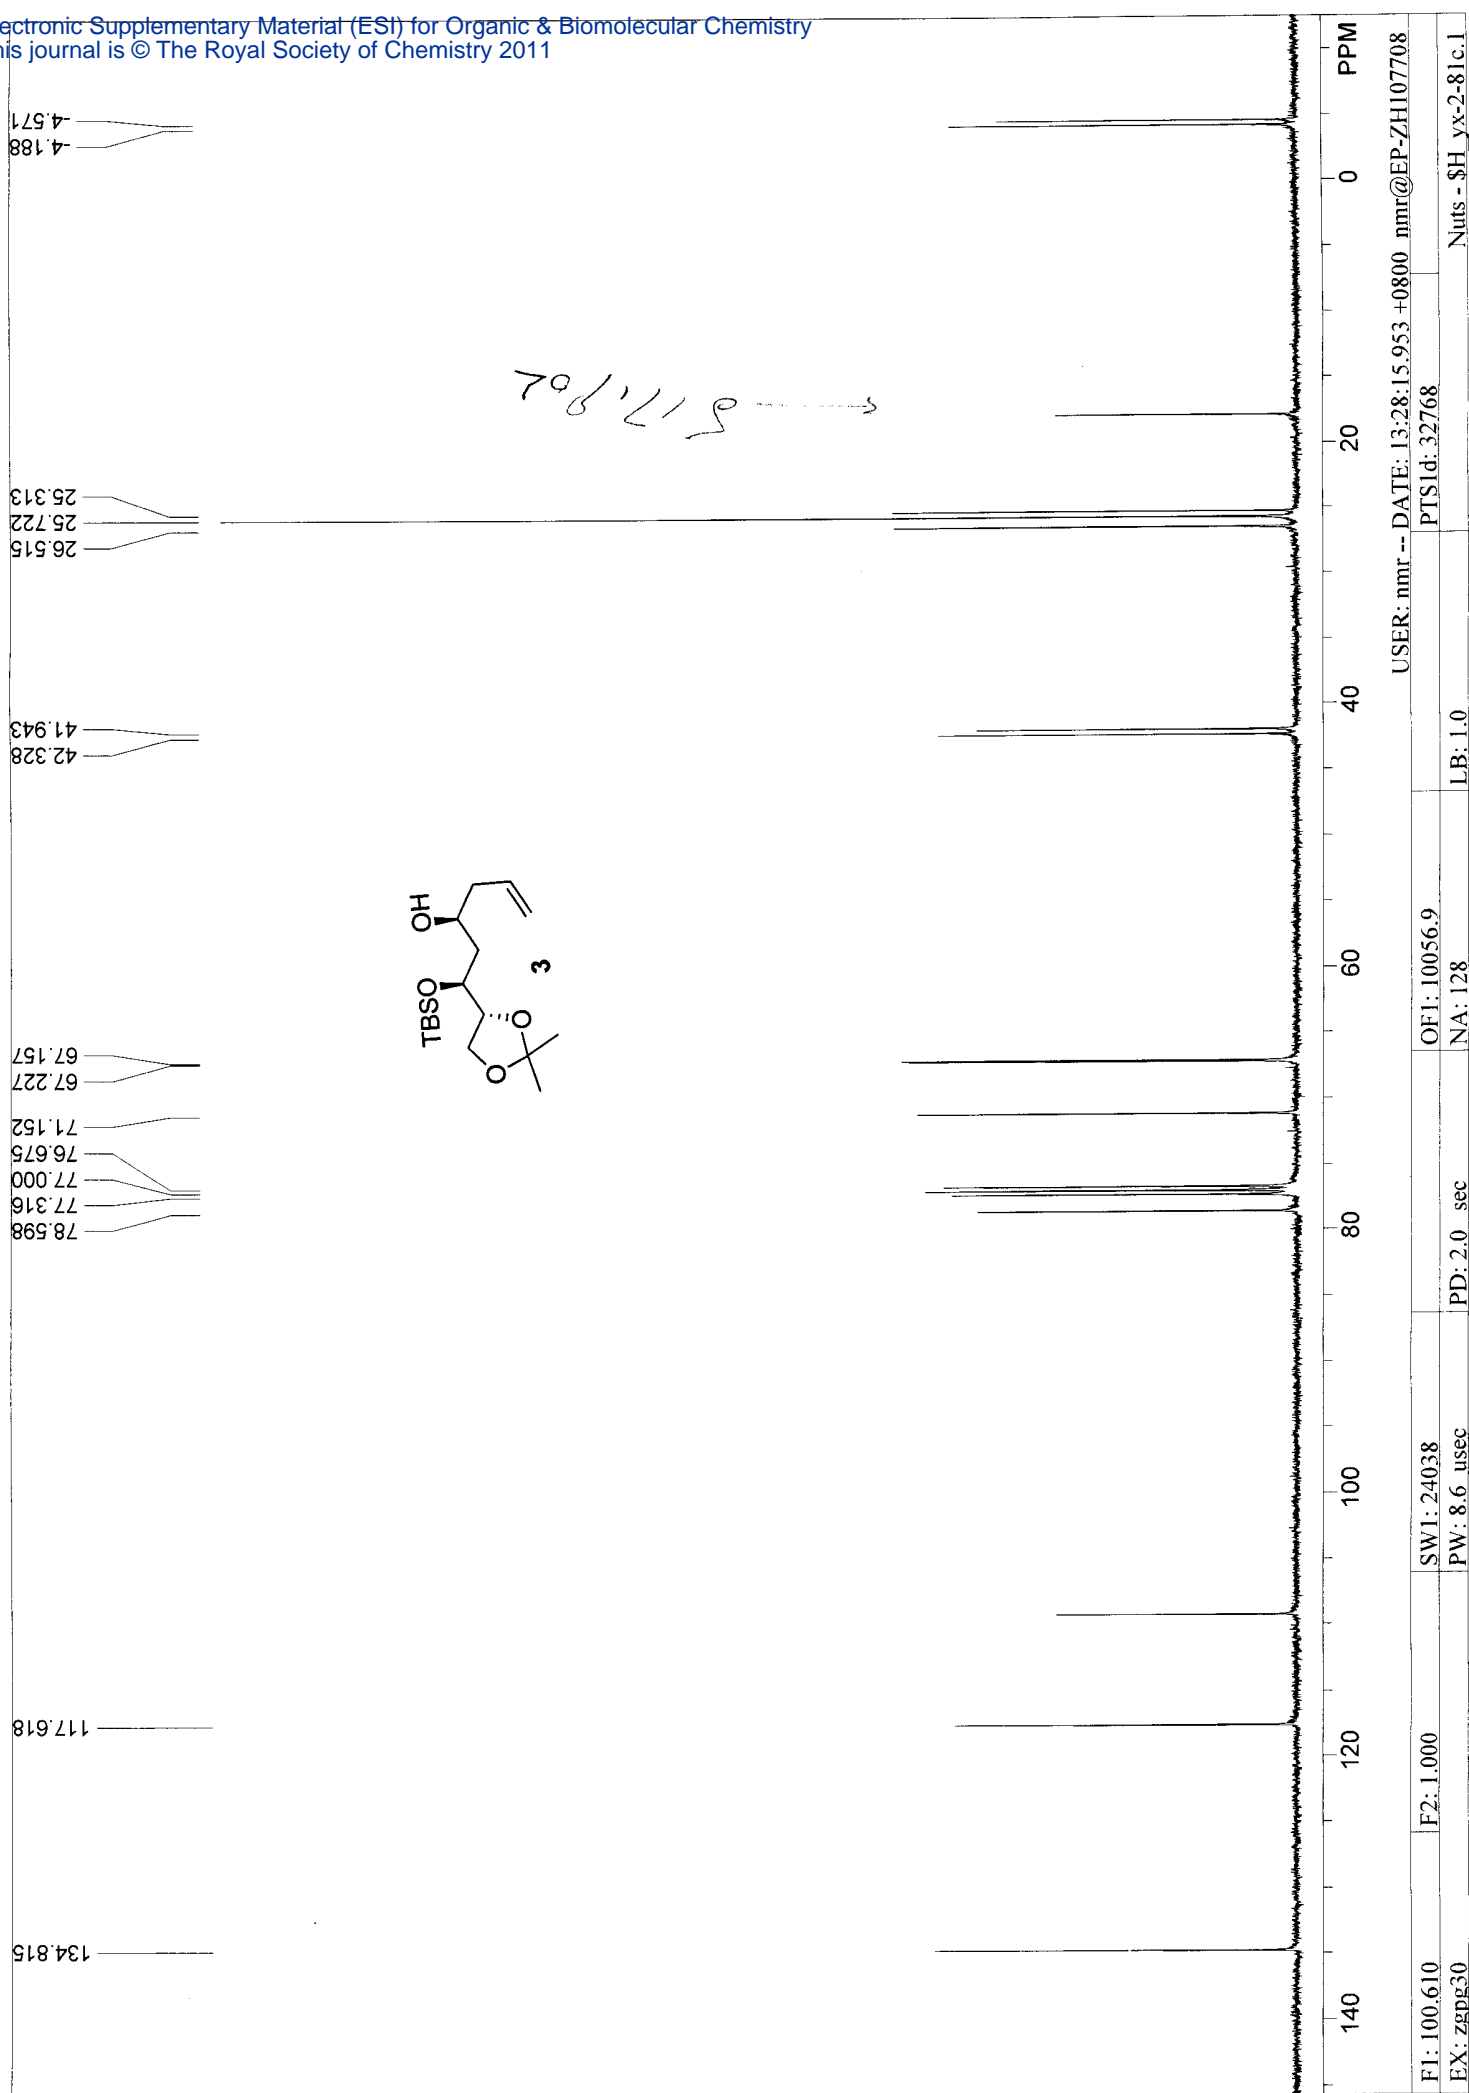

S 5

100 MHz, CDCl<sub>3</sub>

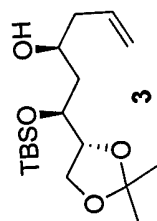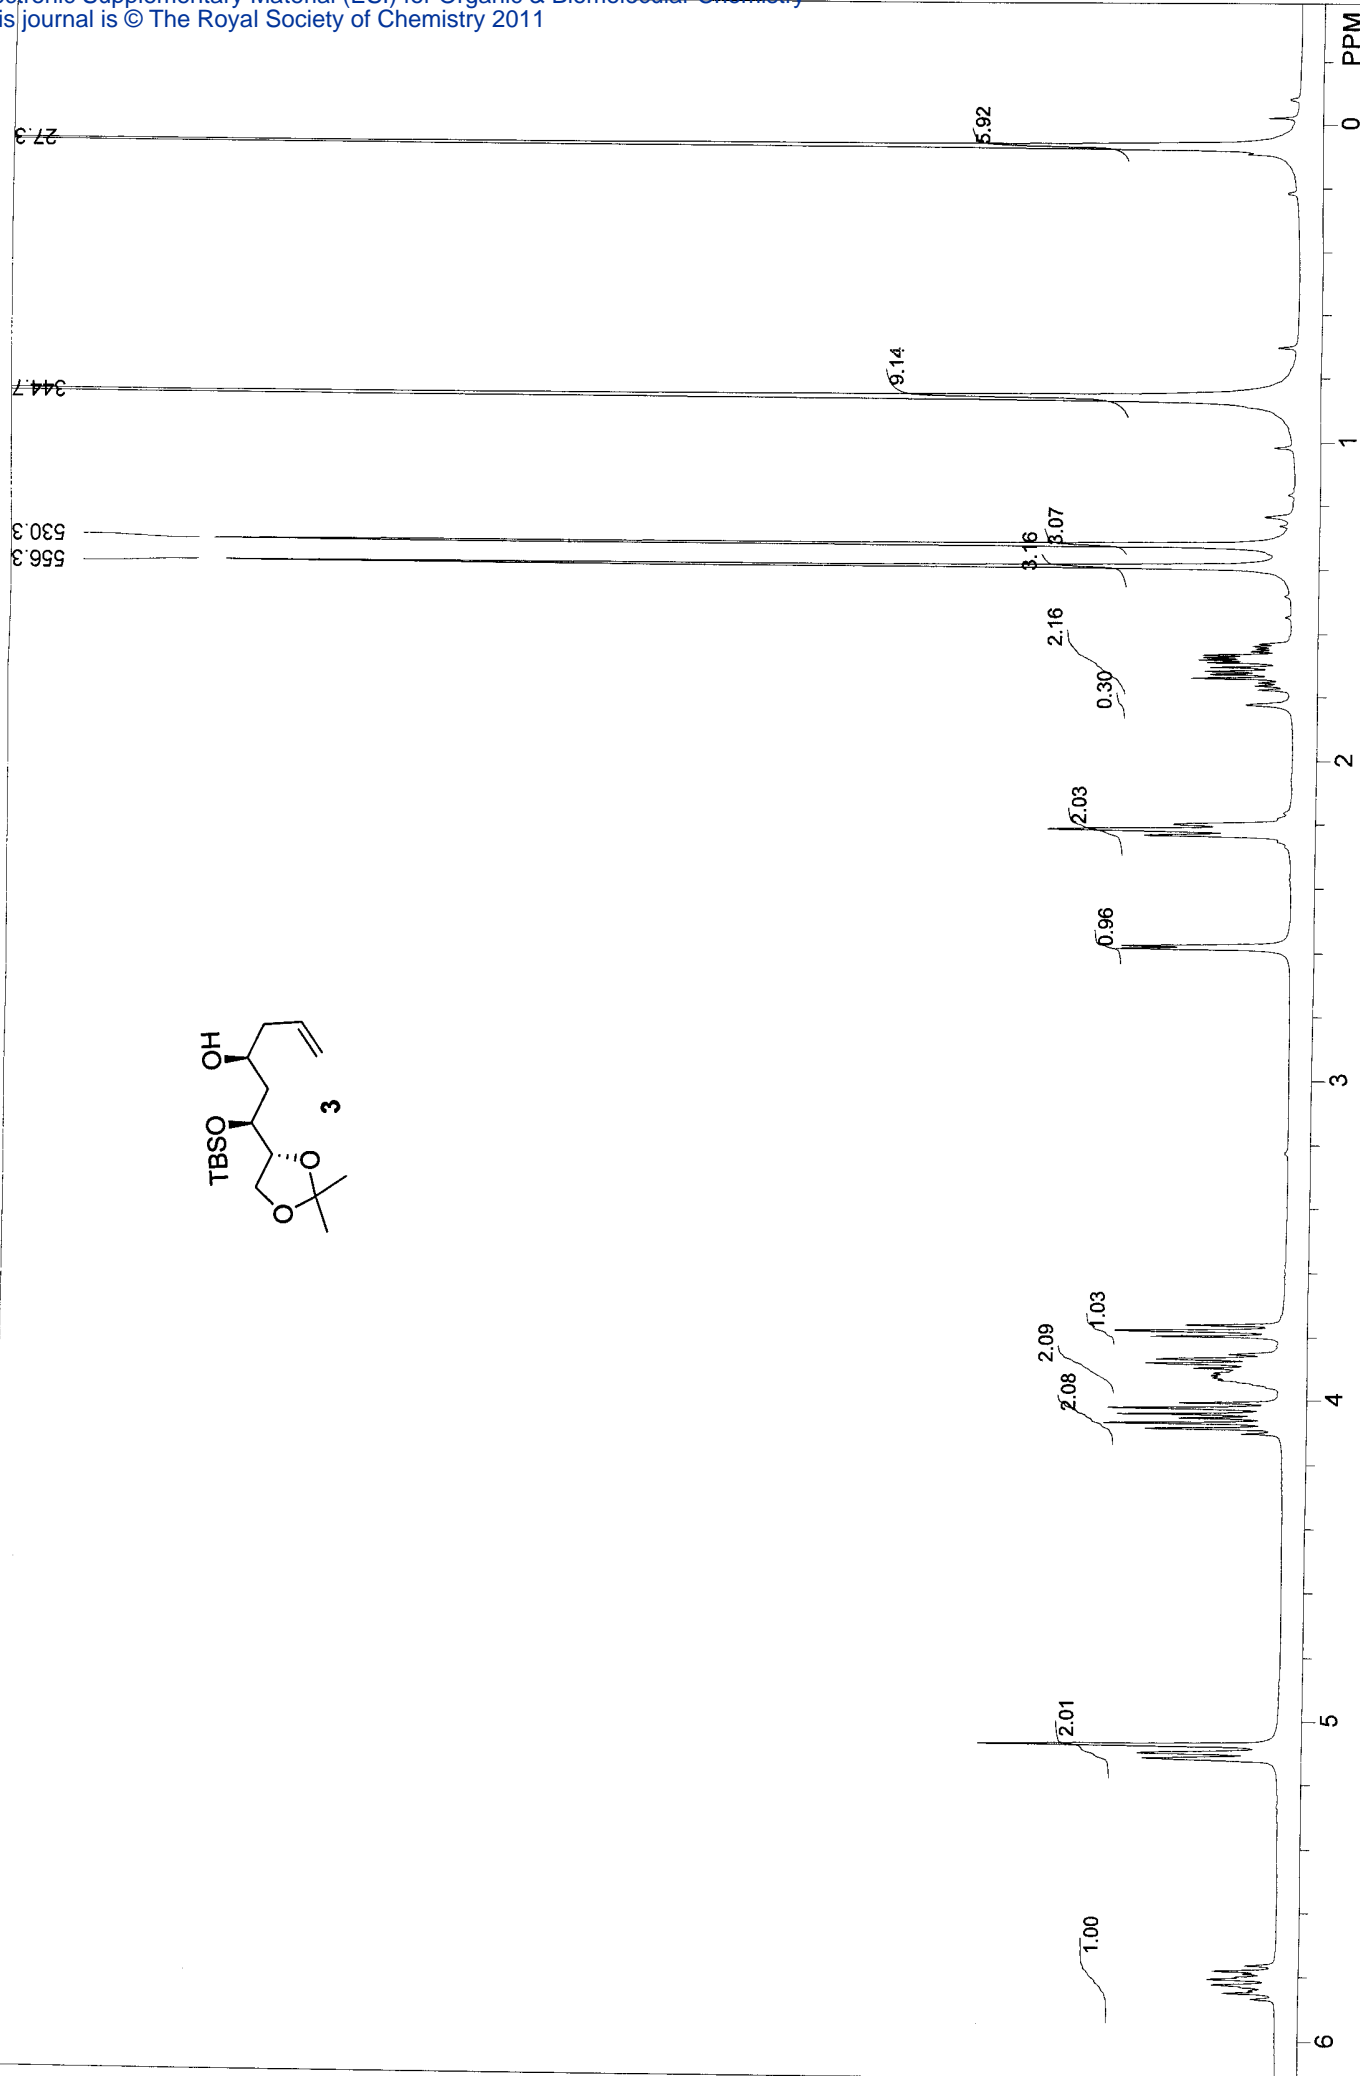

USER: nmr -- DATE: 13:18:49.781 +0800 nmr@EP-ZH107708  
PTSID: 32768  
OFI: 2460.6  
NA: 16  
LB: 0.3  
PD: 1.0 sec  
SW1: 8224  
PW: 9.3 usec  
F1: 400.120  
F2: 1.000  
EX: zg30  
Nuts - \$H\_yx-2-81.1

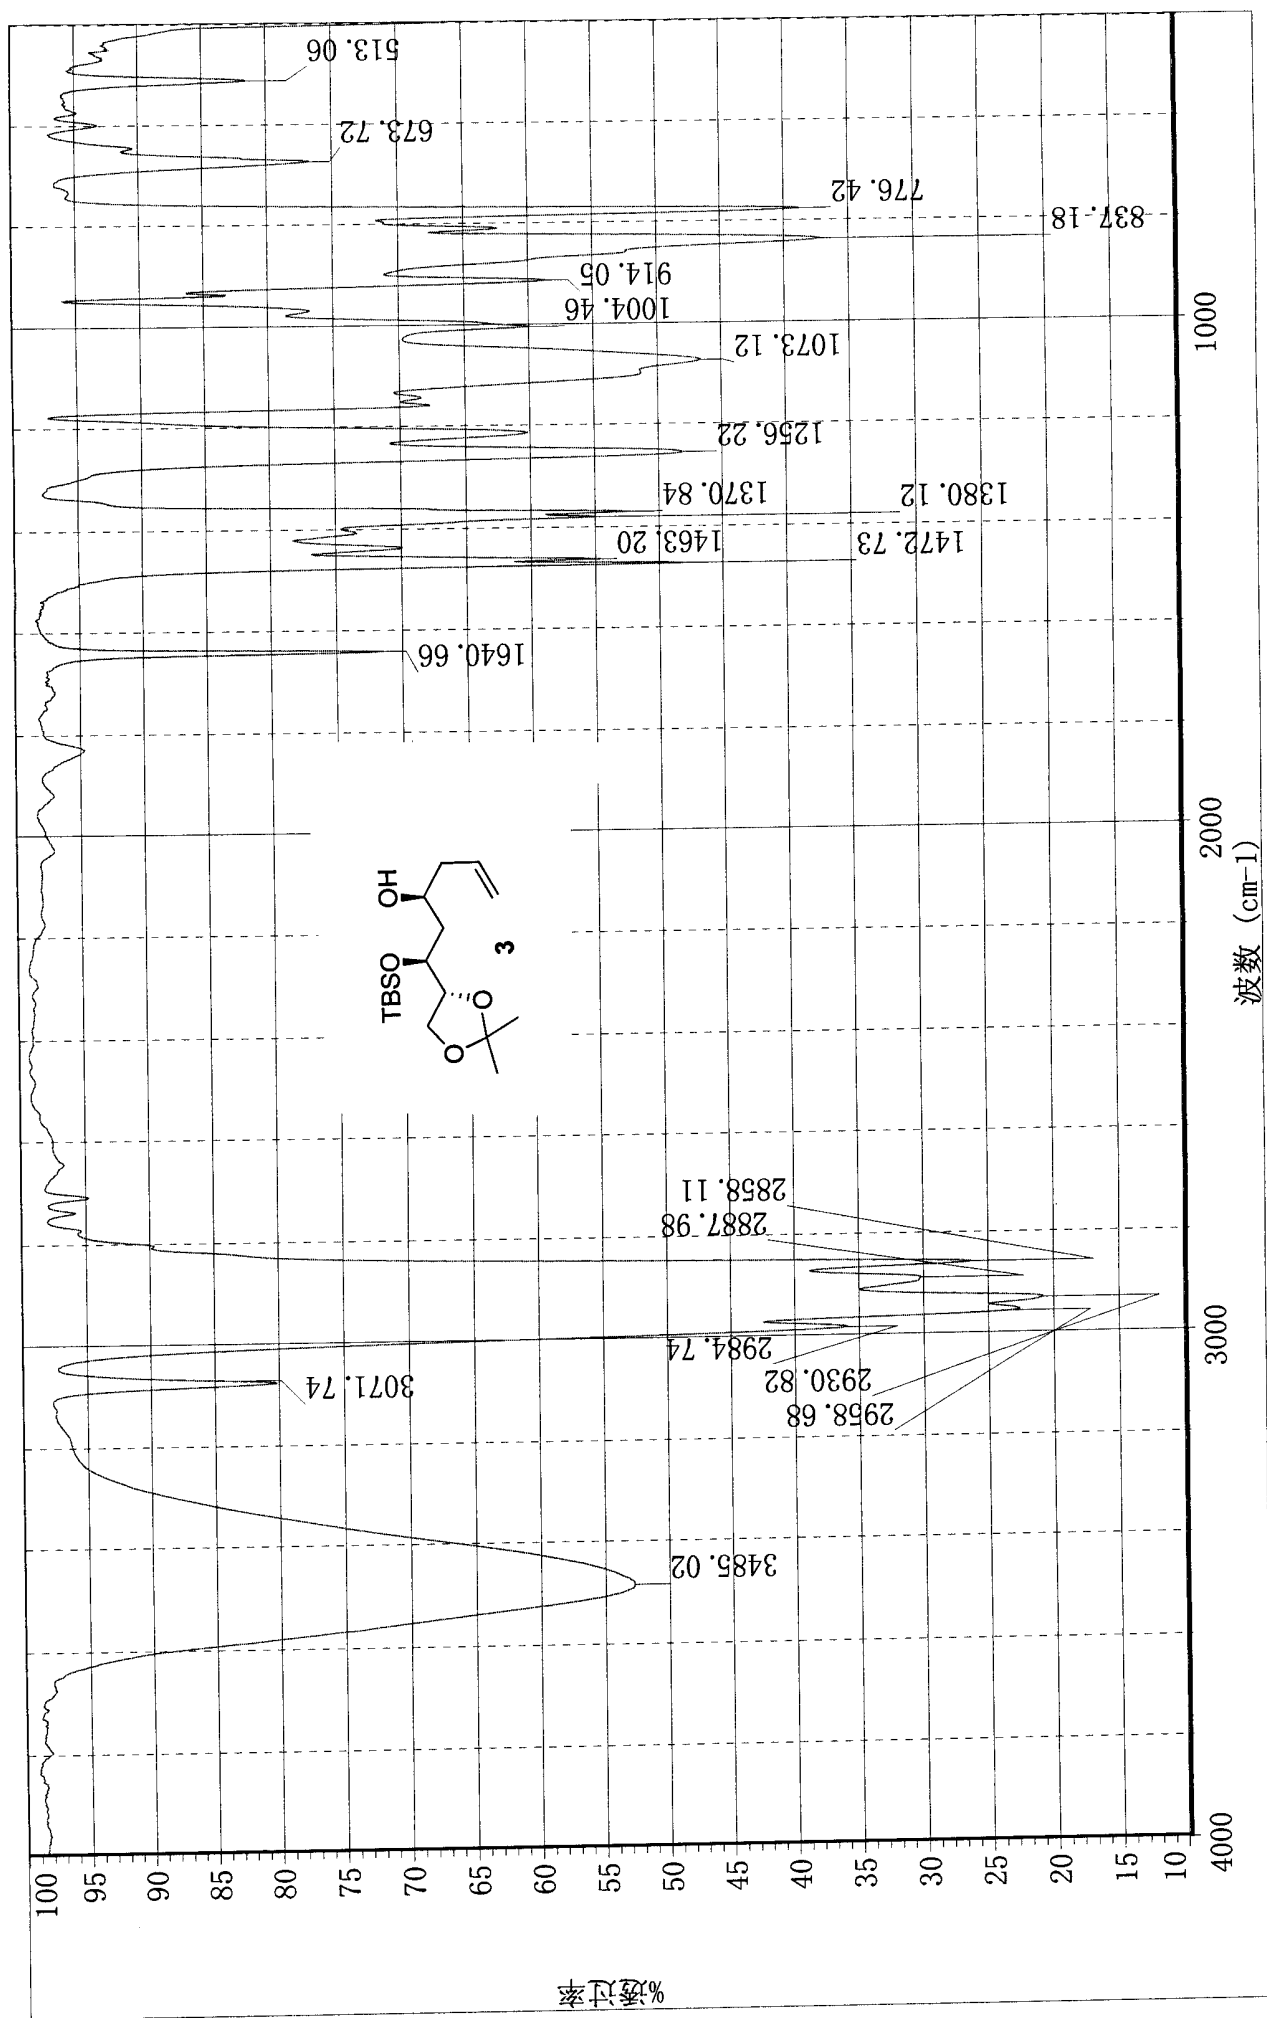

\*\*yx-2-81-2

采集时间: 星期一 2月 21 10:29:53 2011 (GMT+08:00)

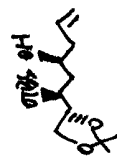

上海有机所生命有机化学国家重点实验室

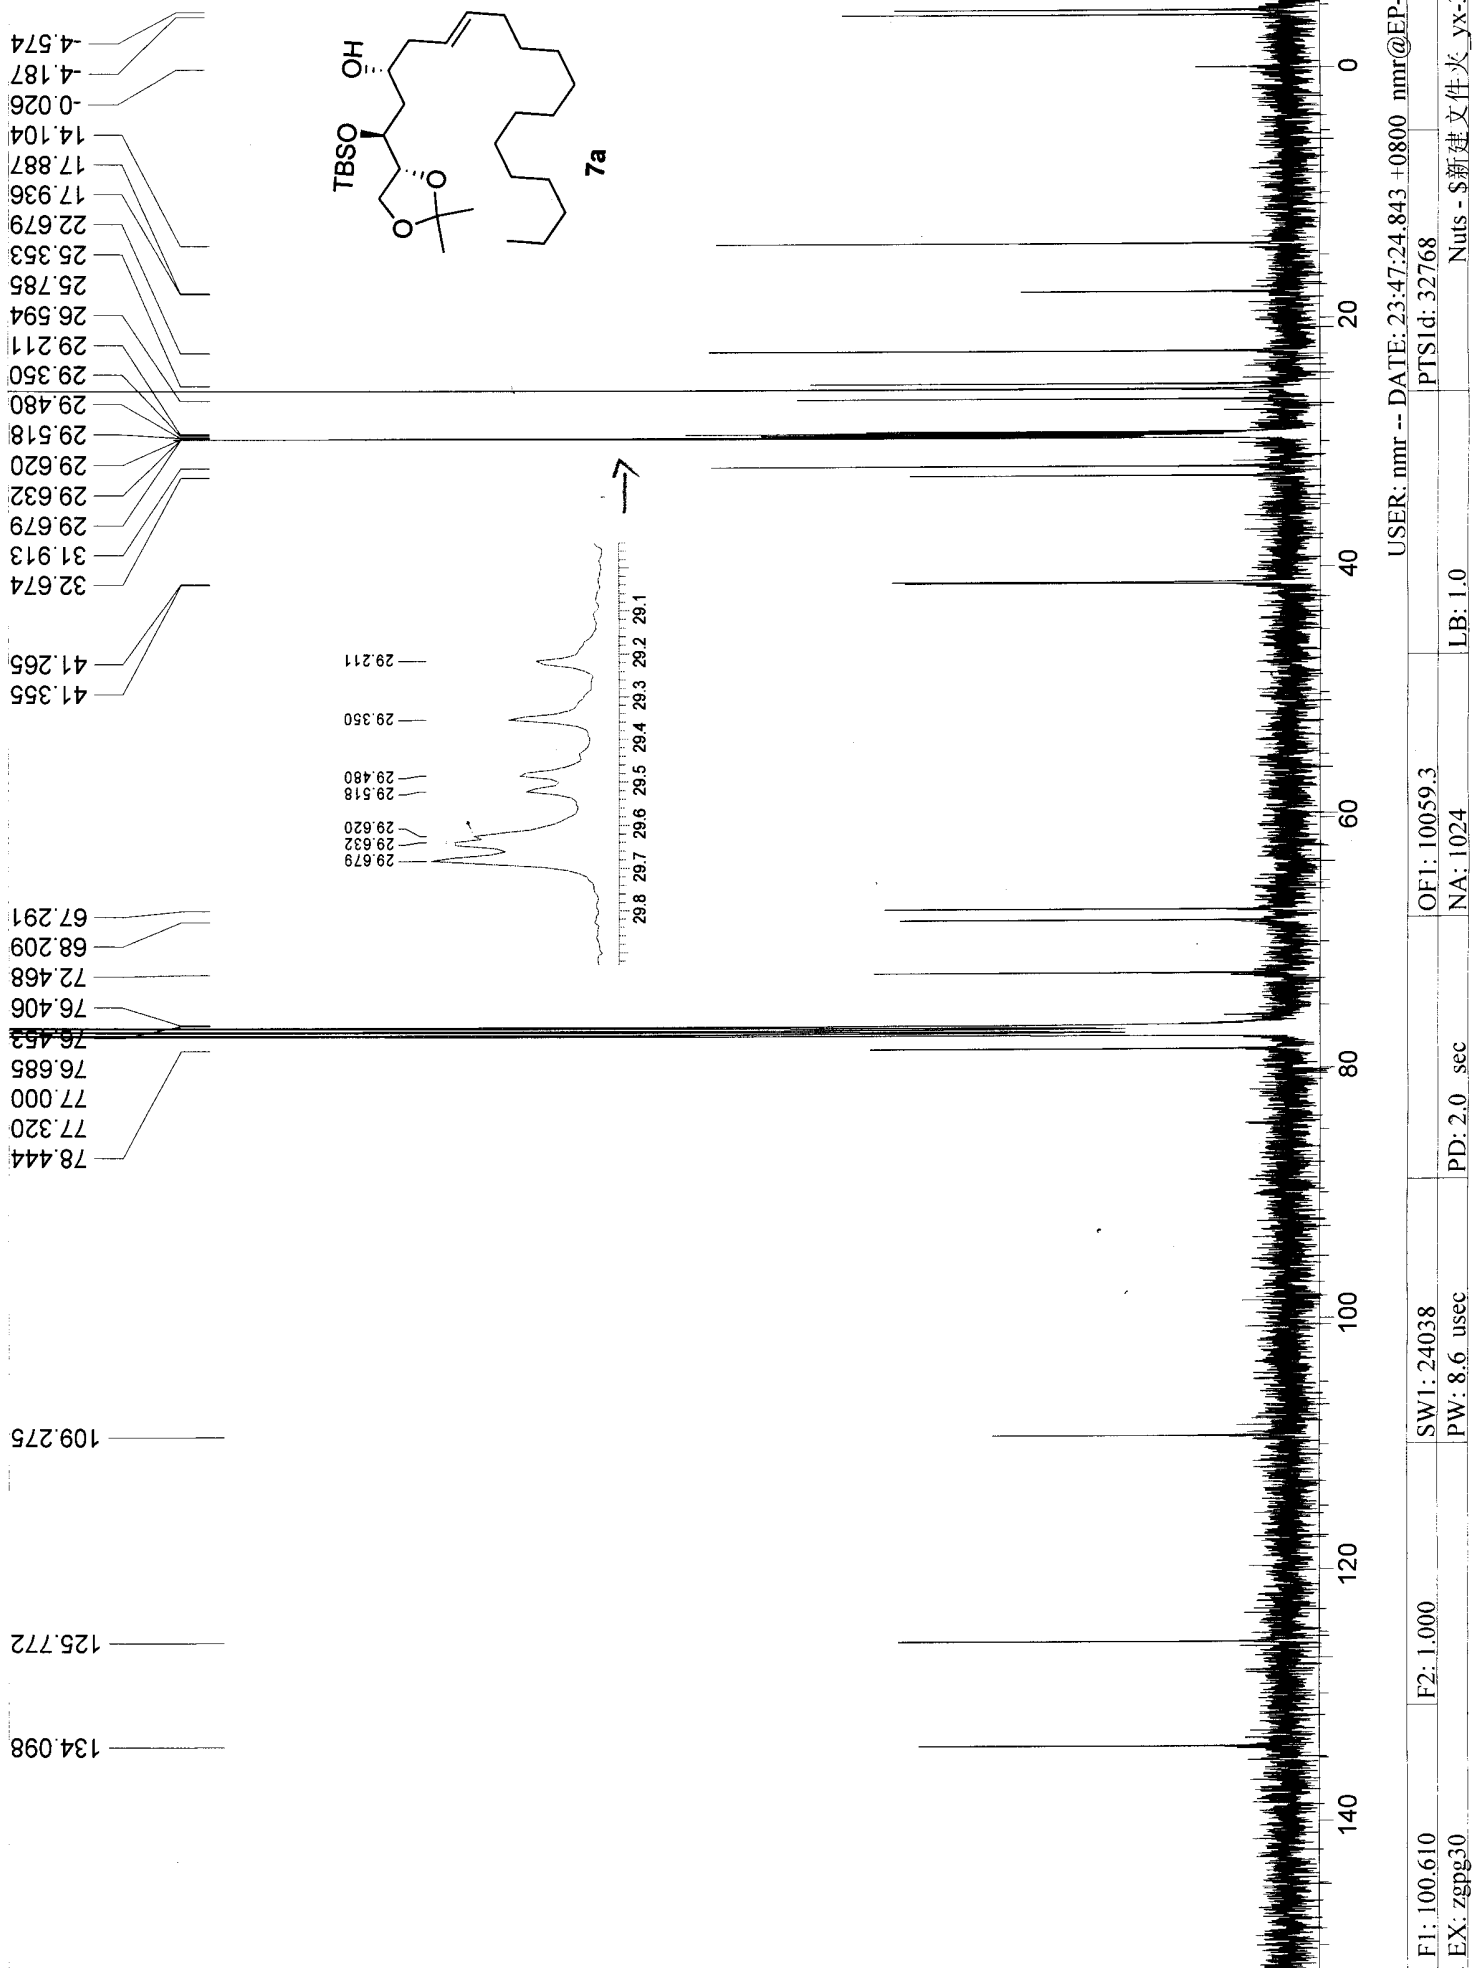



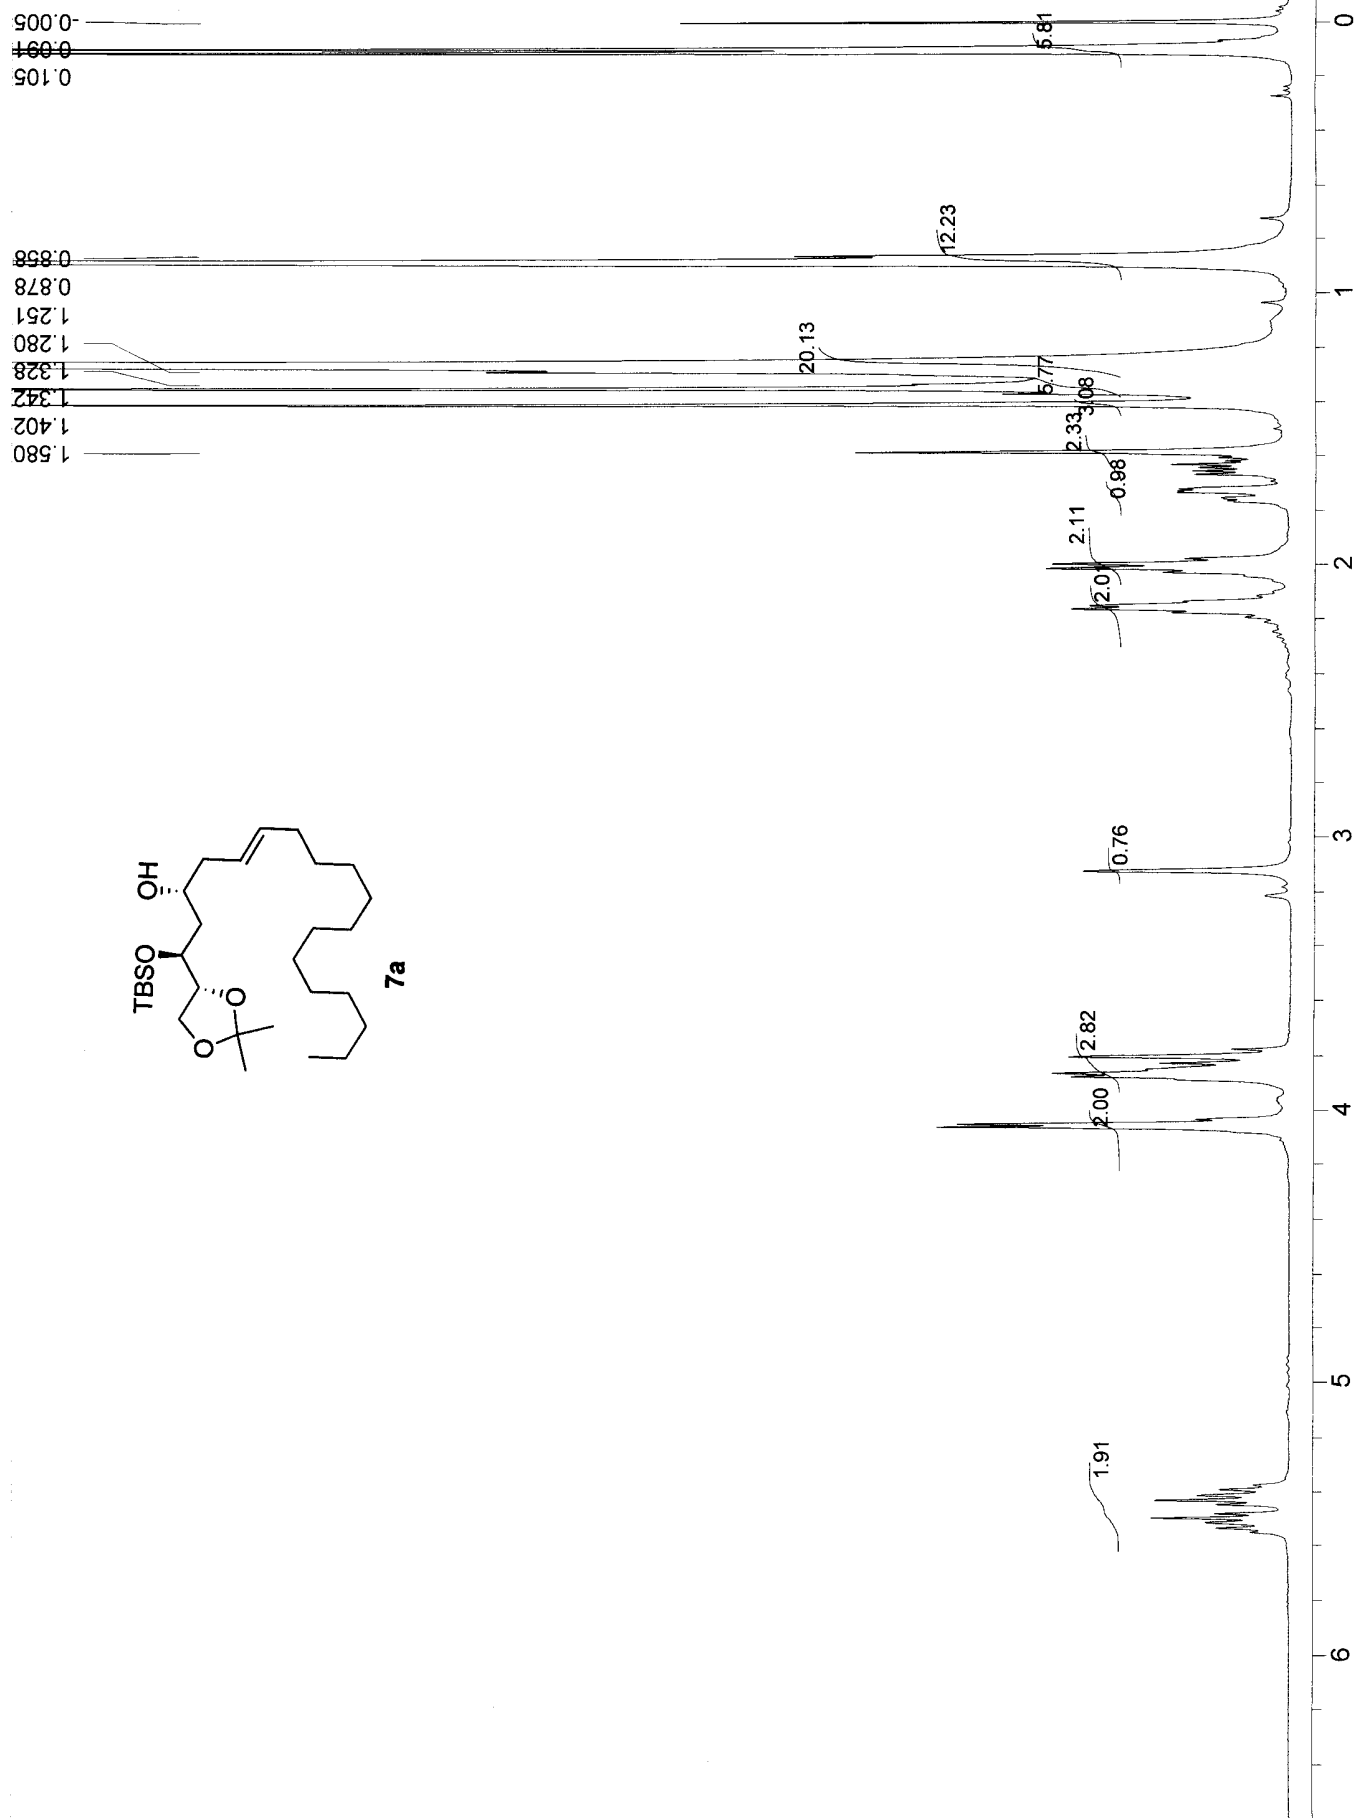

USER: nmr -- DATE: 18:19:42.375 +0800 nmr@EP-ZH107708  
PTSId: 32768  
OF1: 2460.6  
NA: 16  
PD: 1.0 sec  
SW1: 8224  
F2: 1.000  
EX: zg30  
PW: 9.3 usec  
LB: 0.3  
Nuts - \$新建文件火\_yx-3-28-up.1

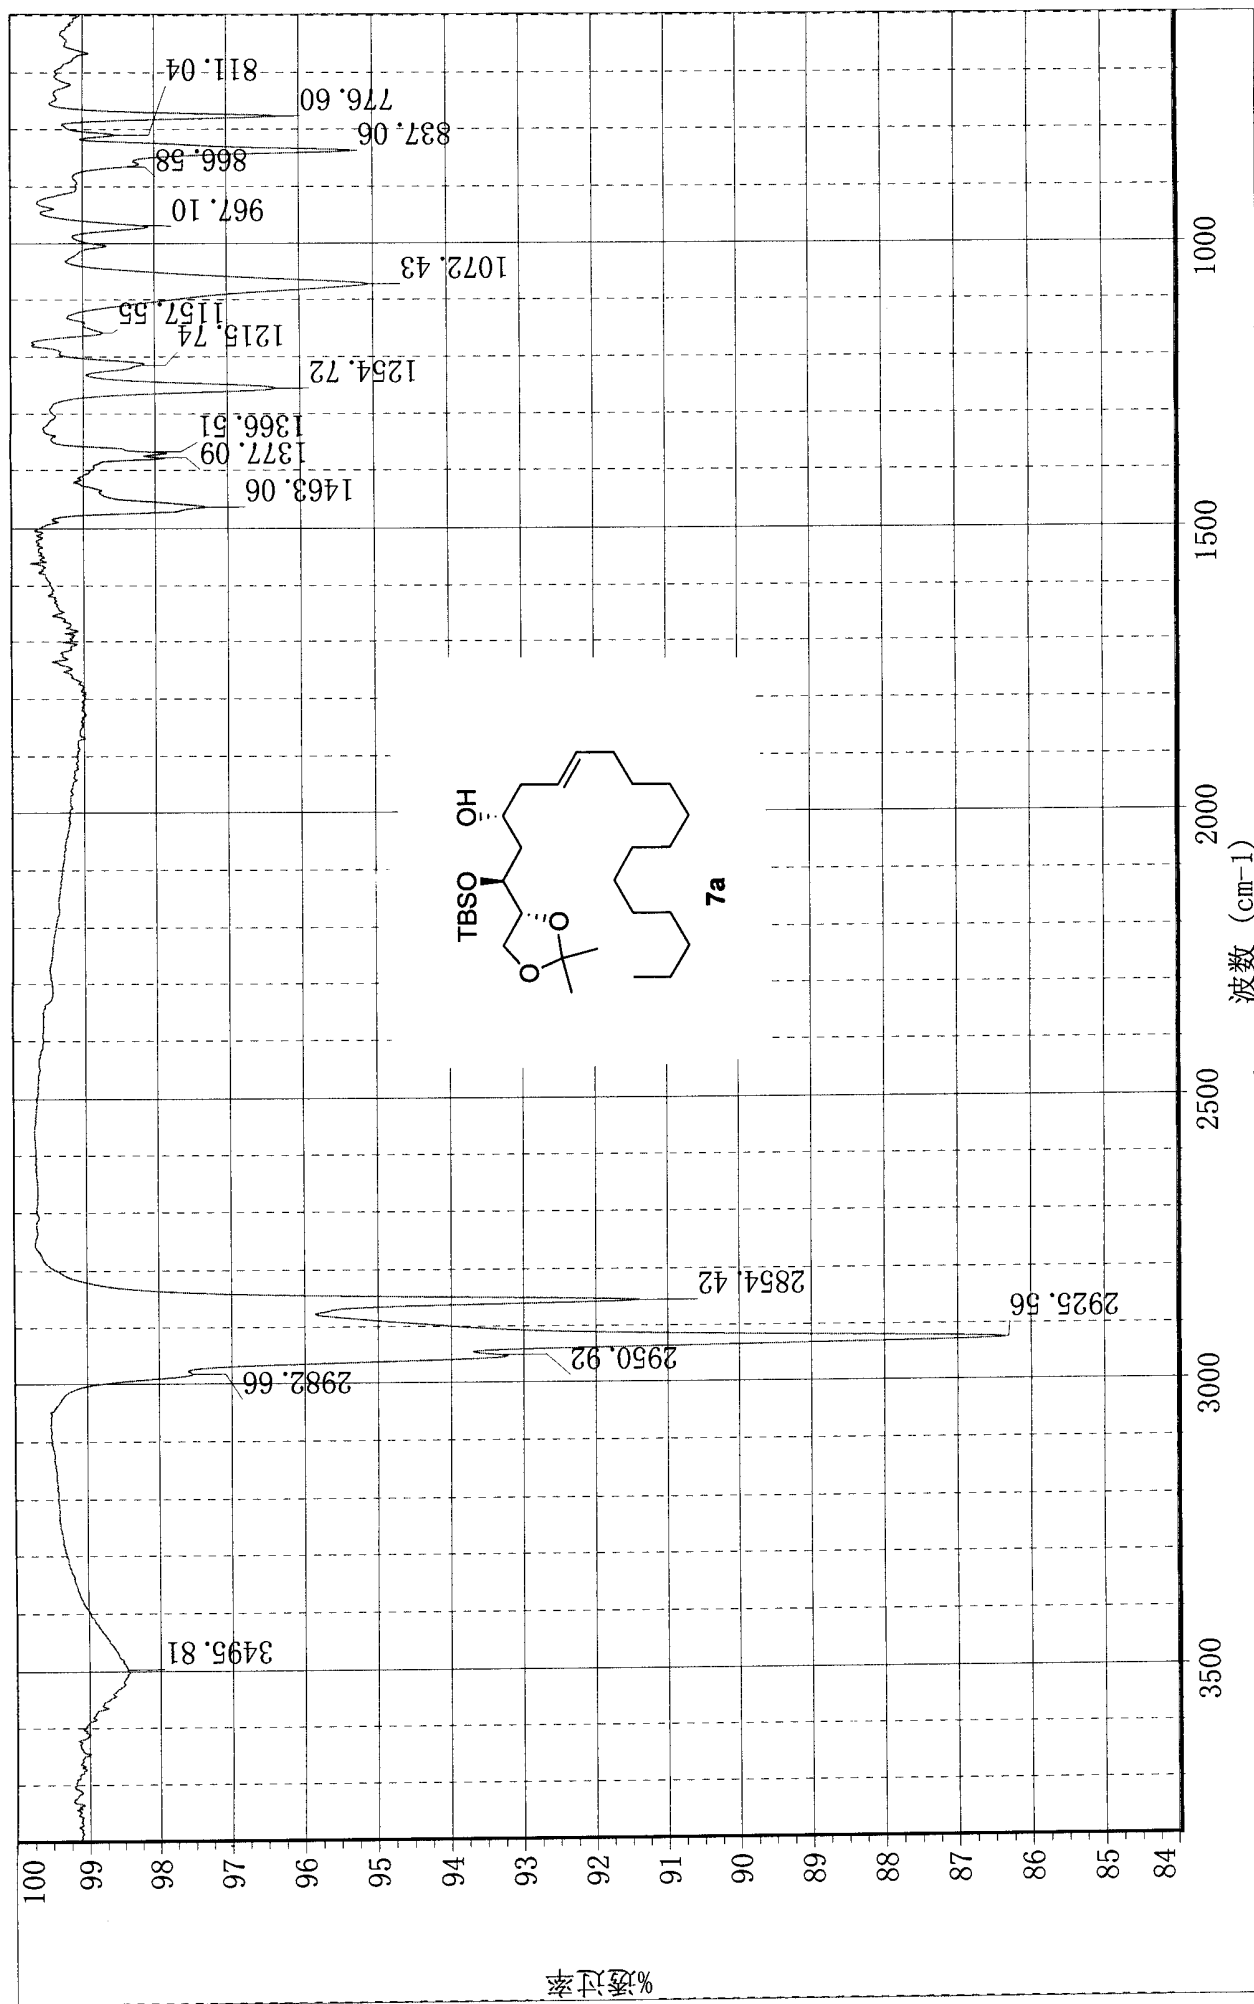

\*\*\*yx-3-28-up

采集时间: 星期六 12月 18 13:47:00 2010 (GMT+08:00)

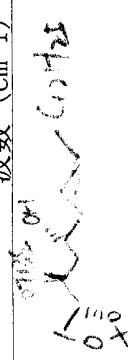

上海有机所生命有机化学国家重点实验室

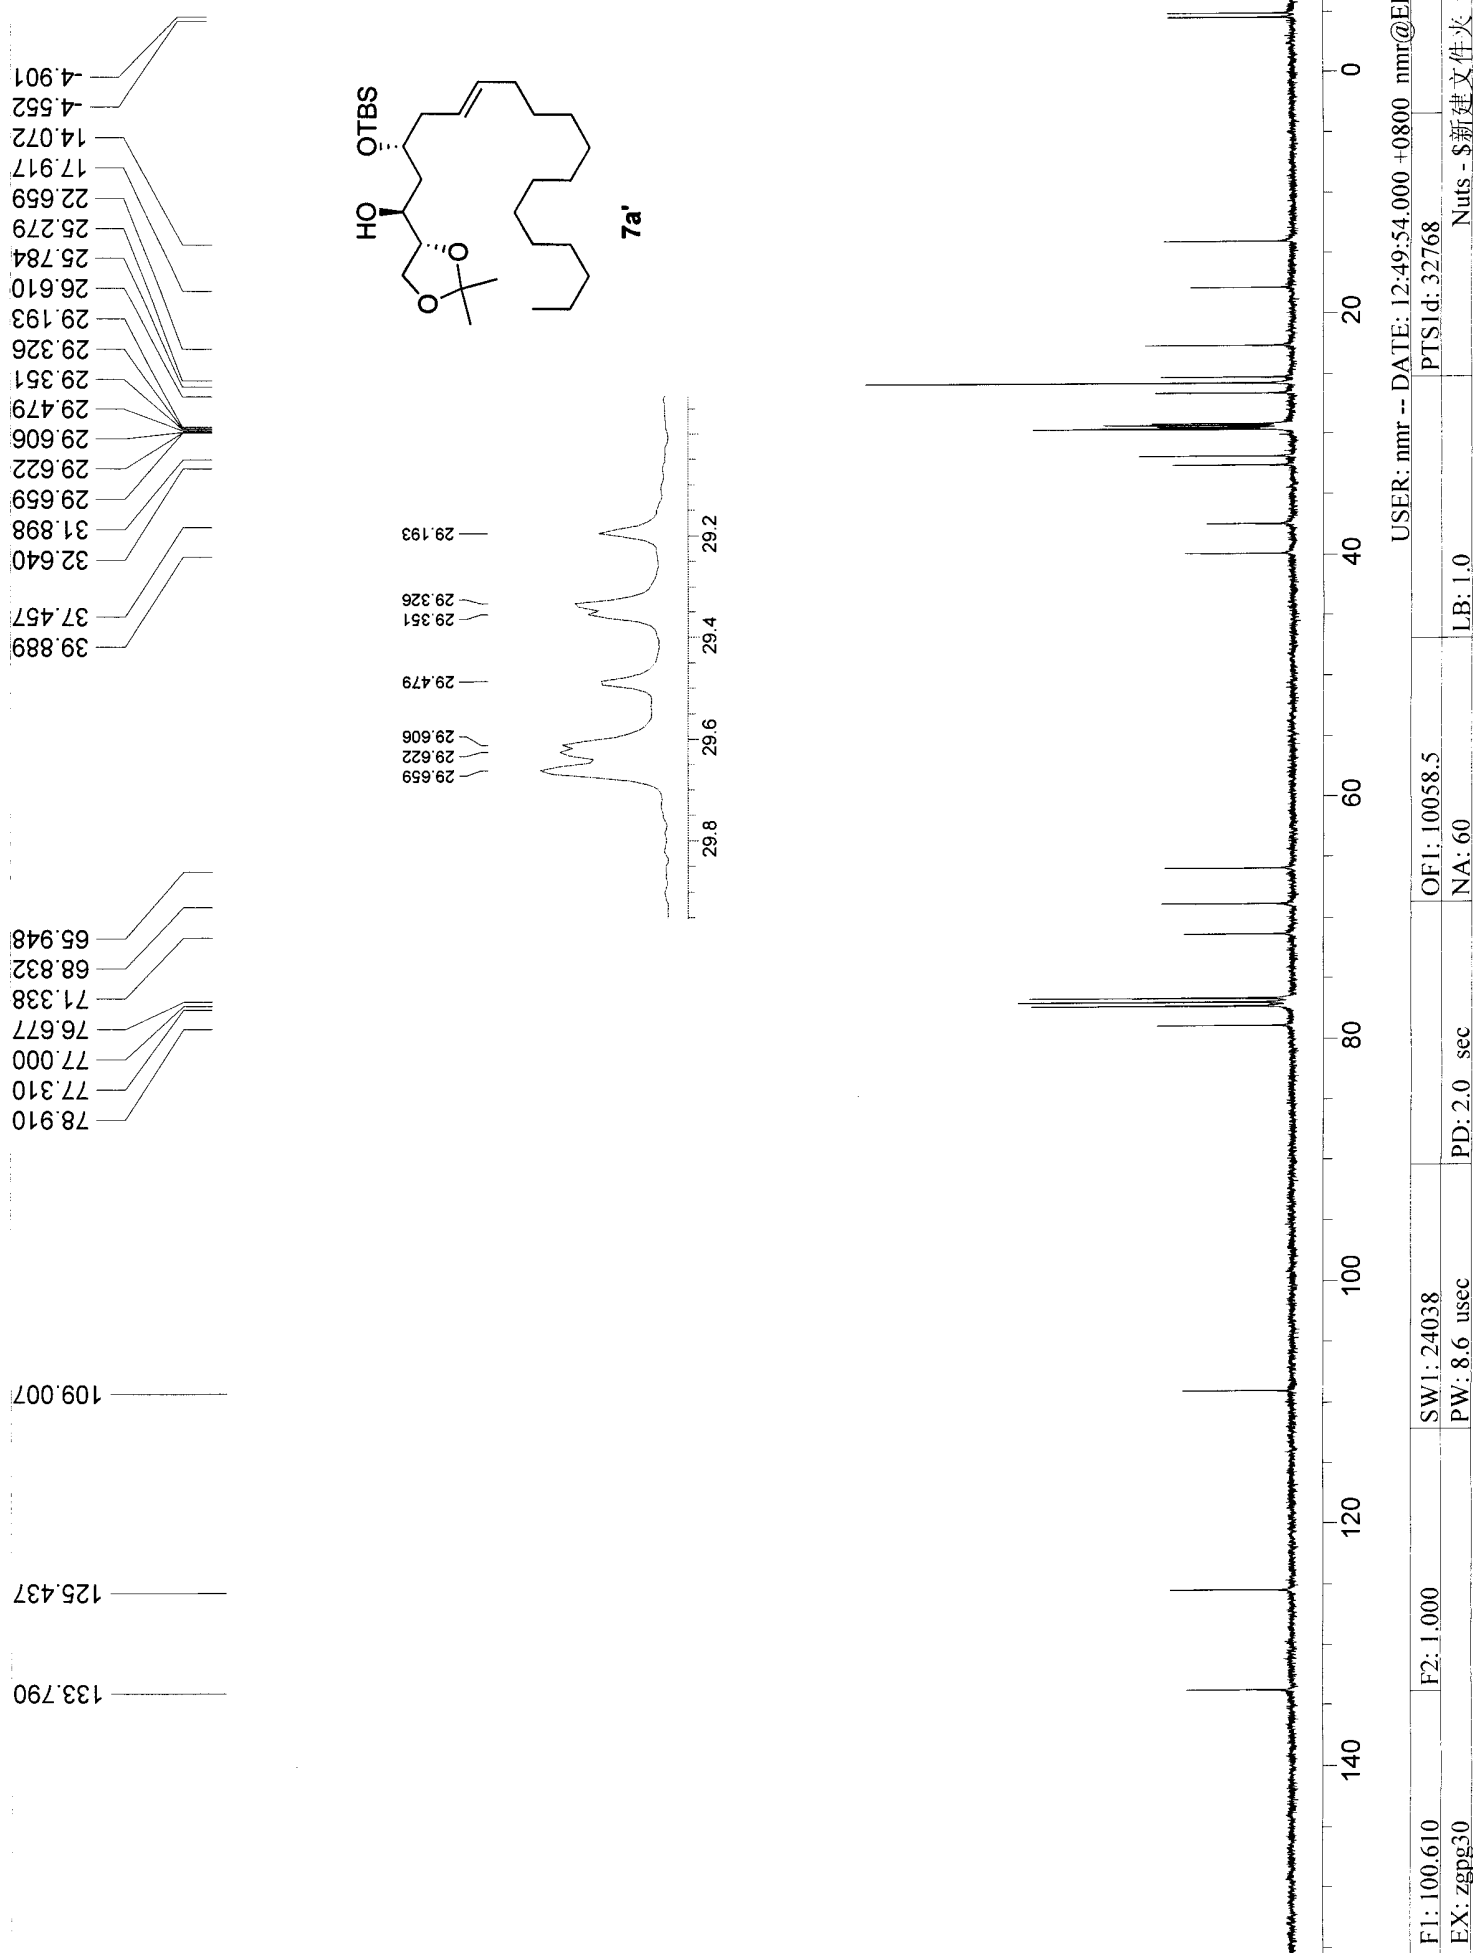

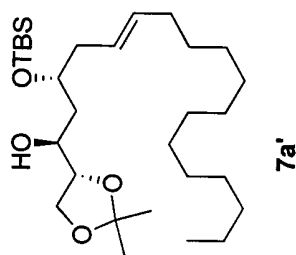

7a'

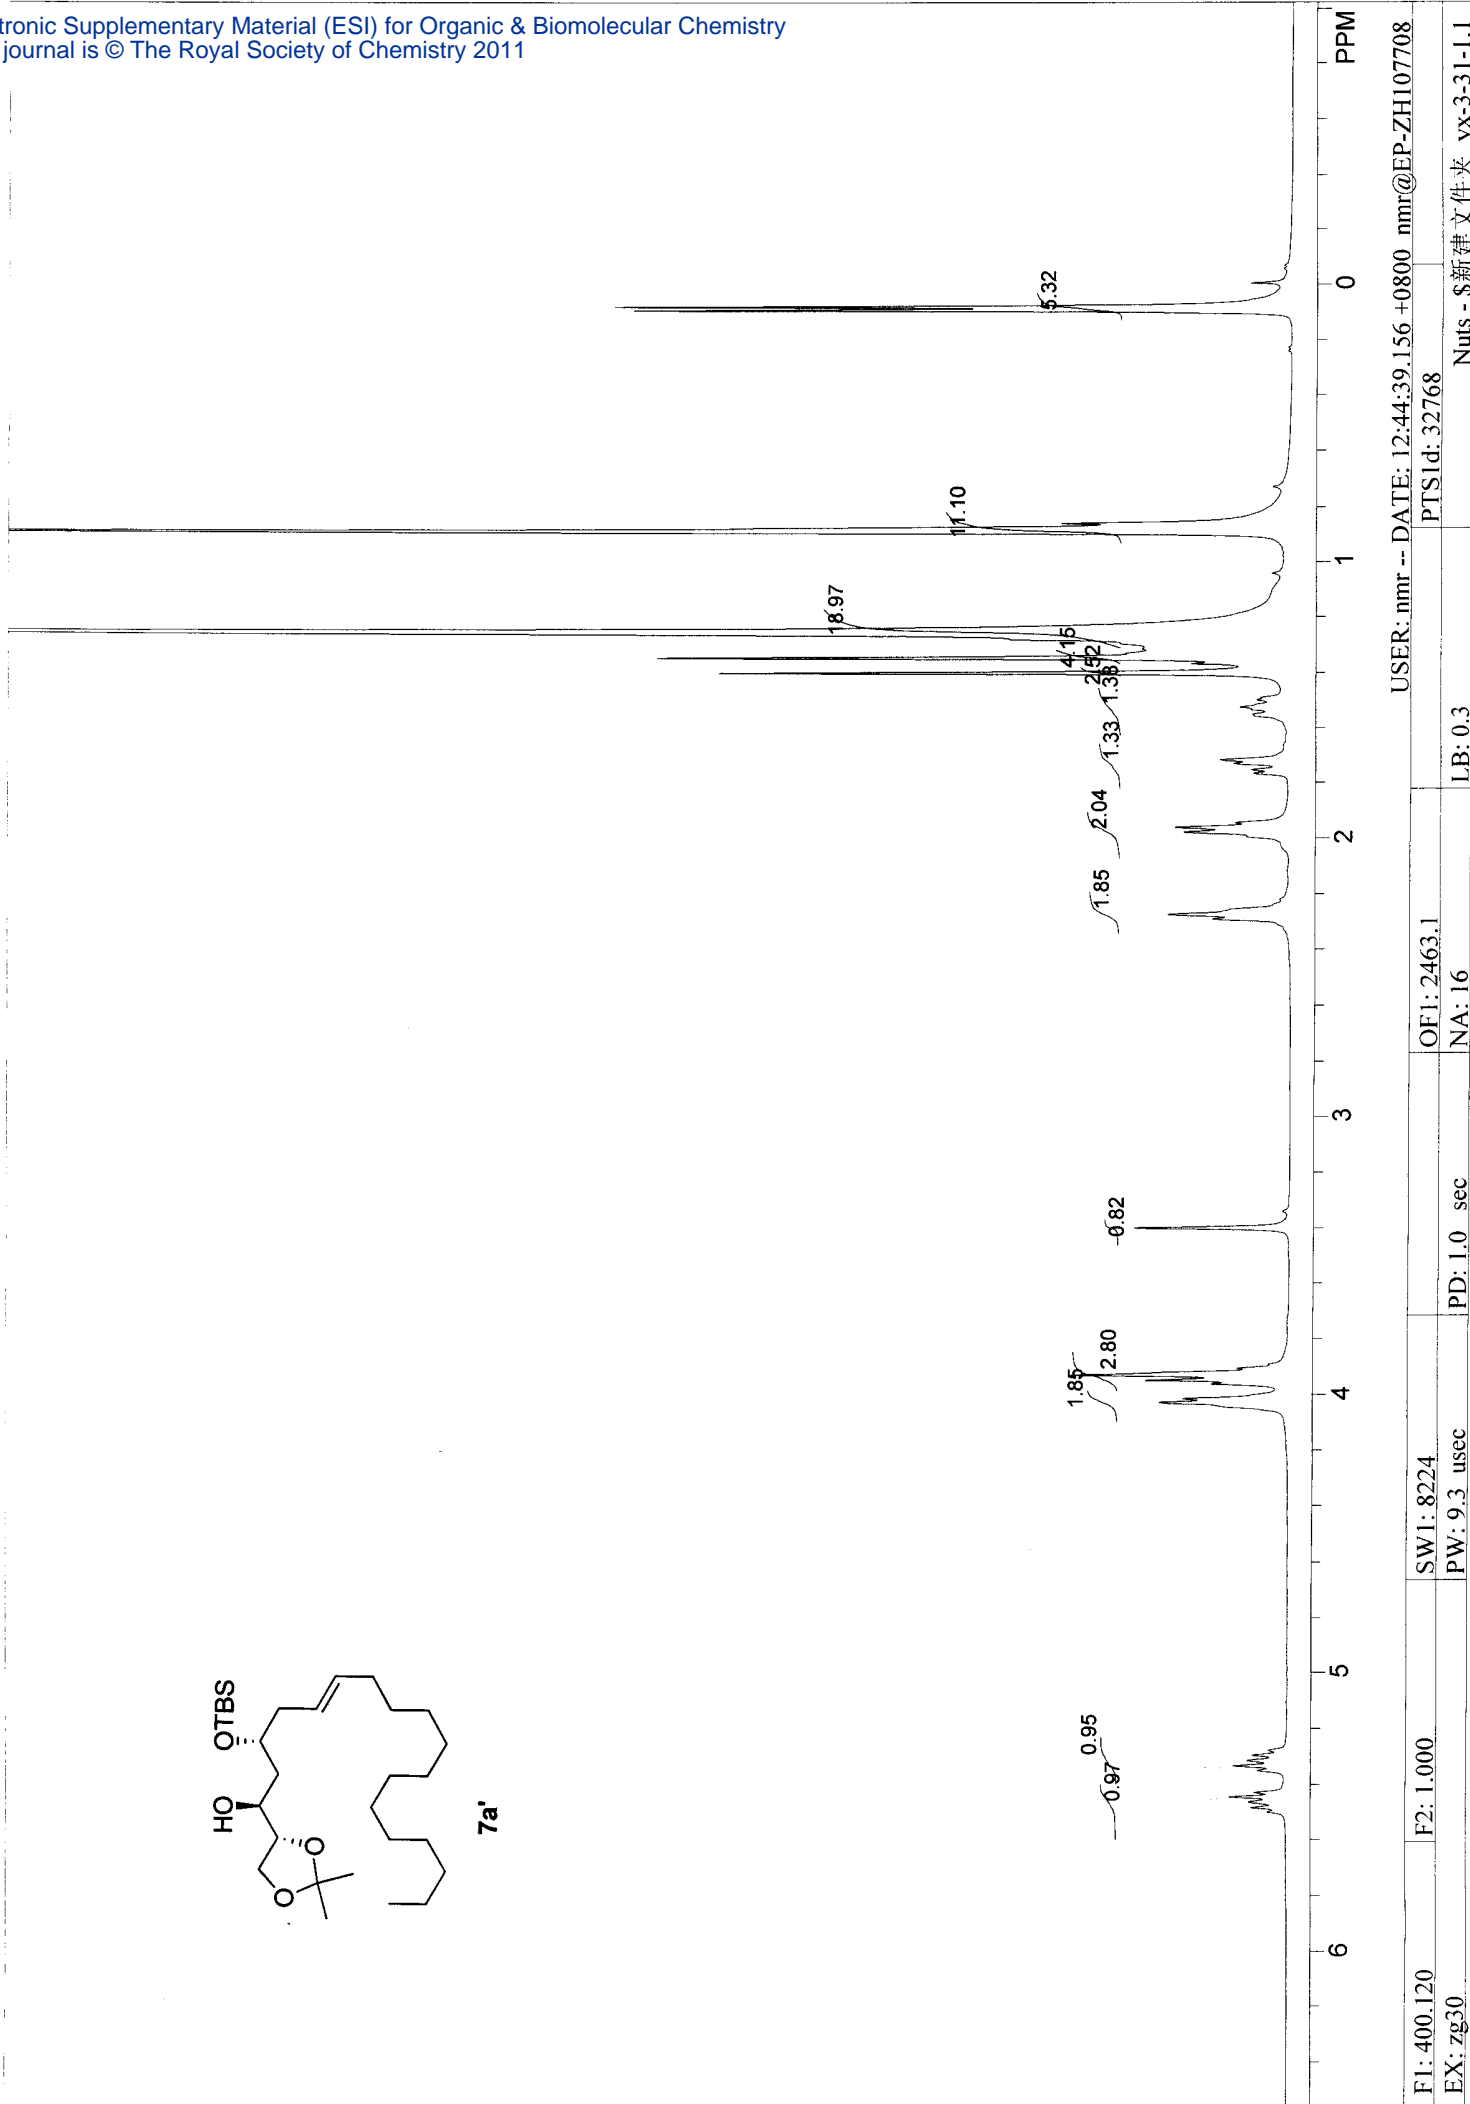

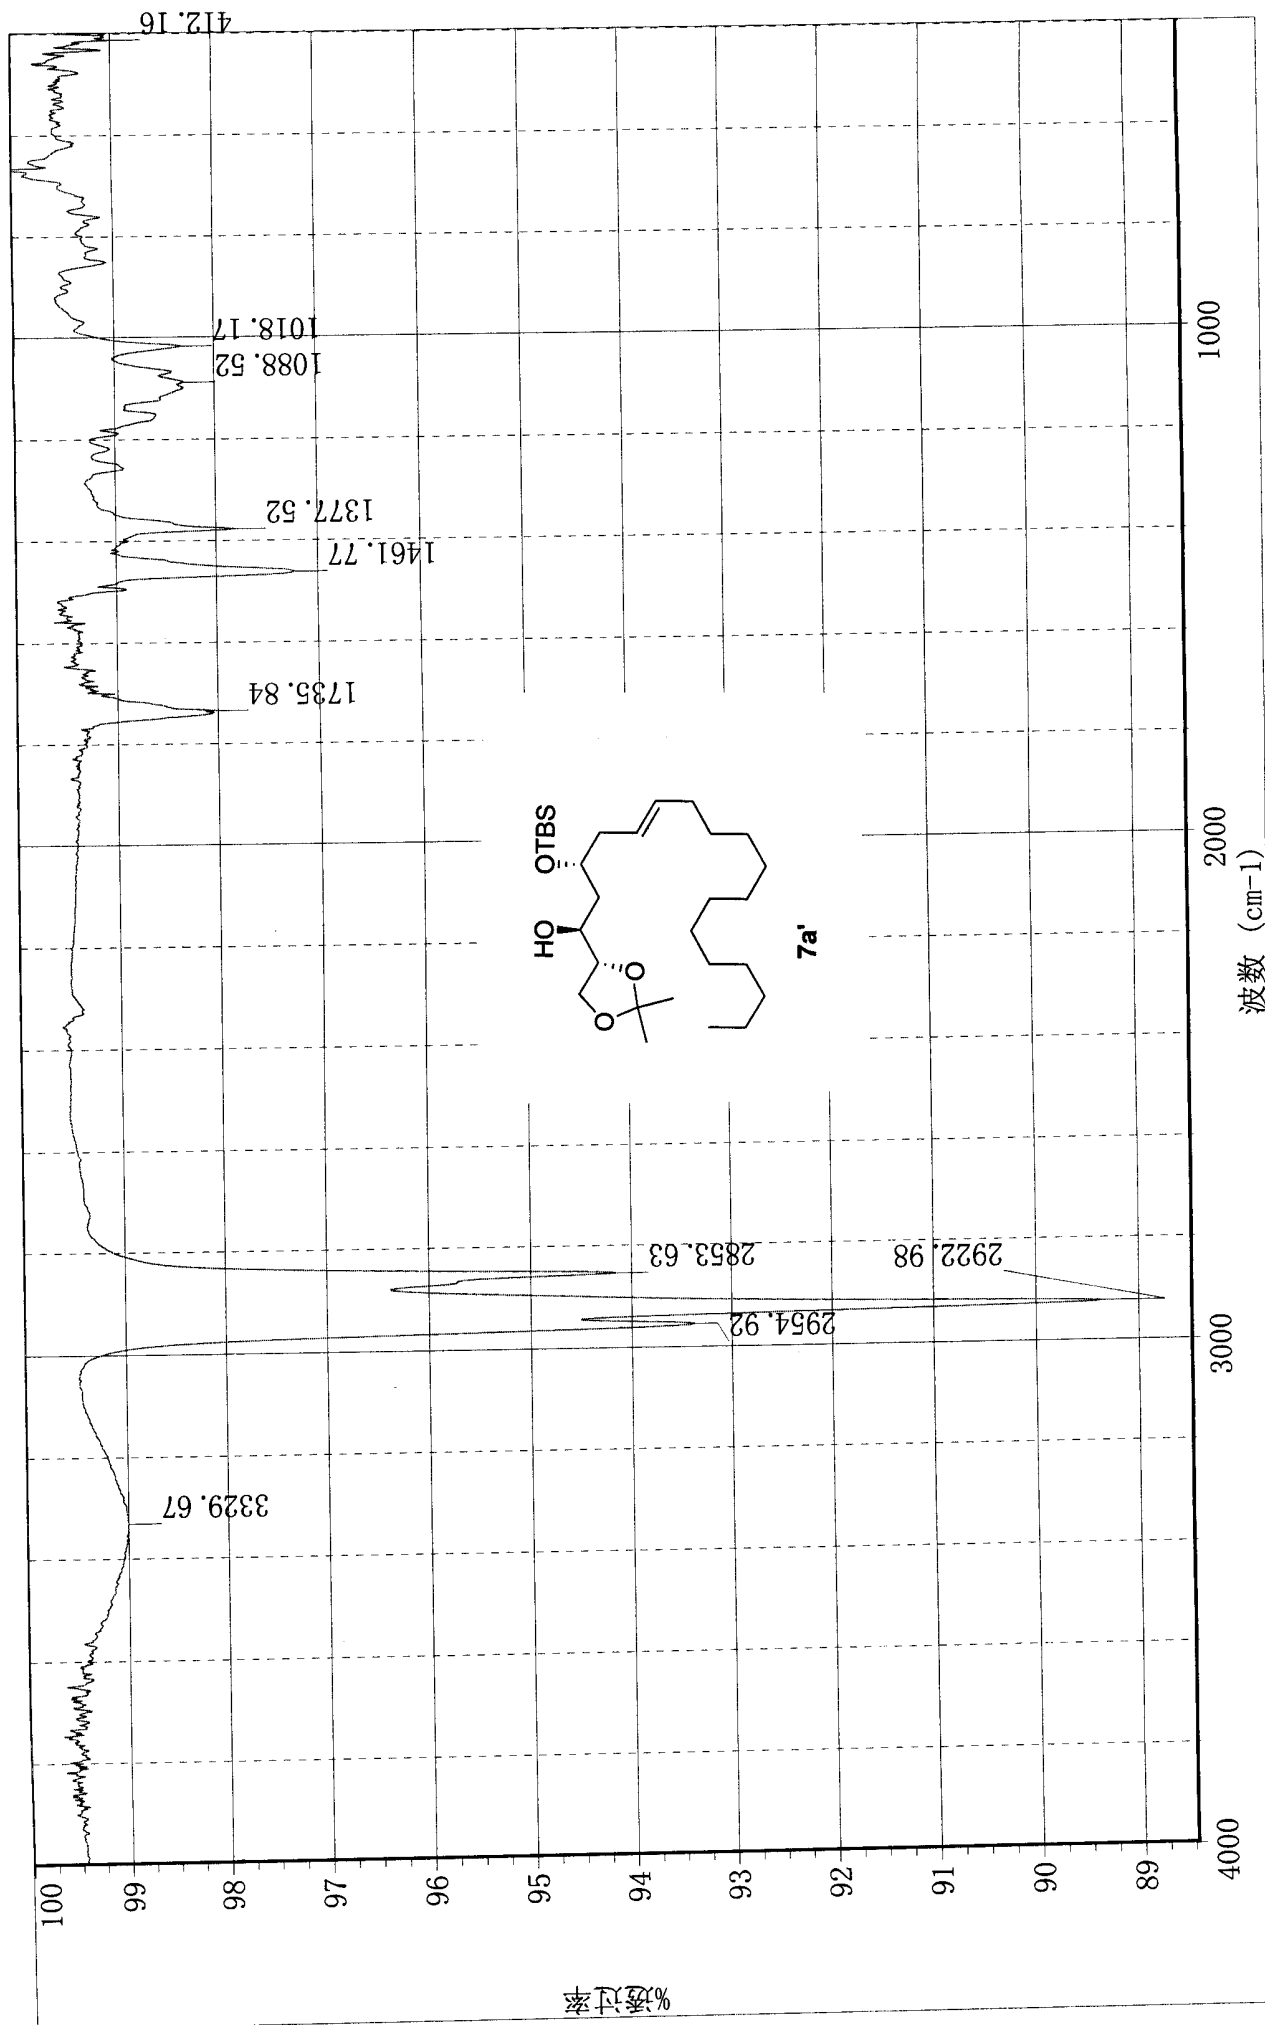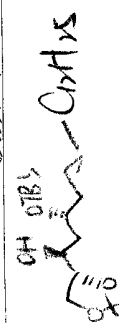

\*yx-3-29-1

采集时间: 星期三 1月 12 20:48:18 2011 (GMT+08:00)

Conflys

上海有机所生命有机化学国家重点实验室

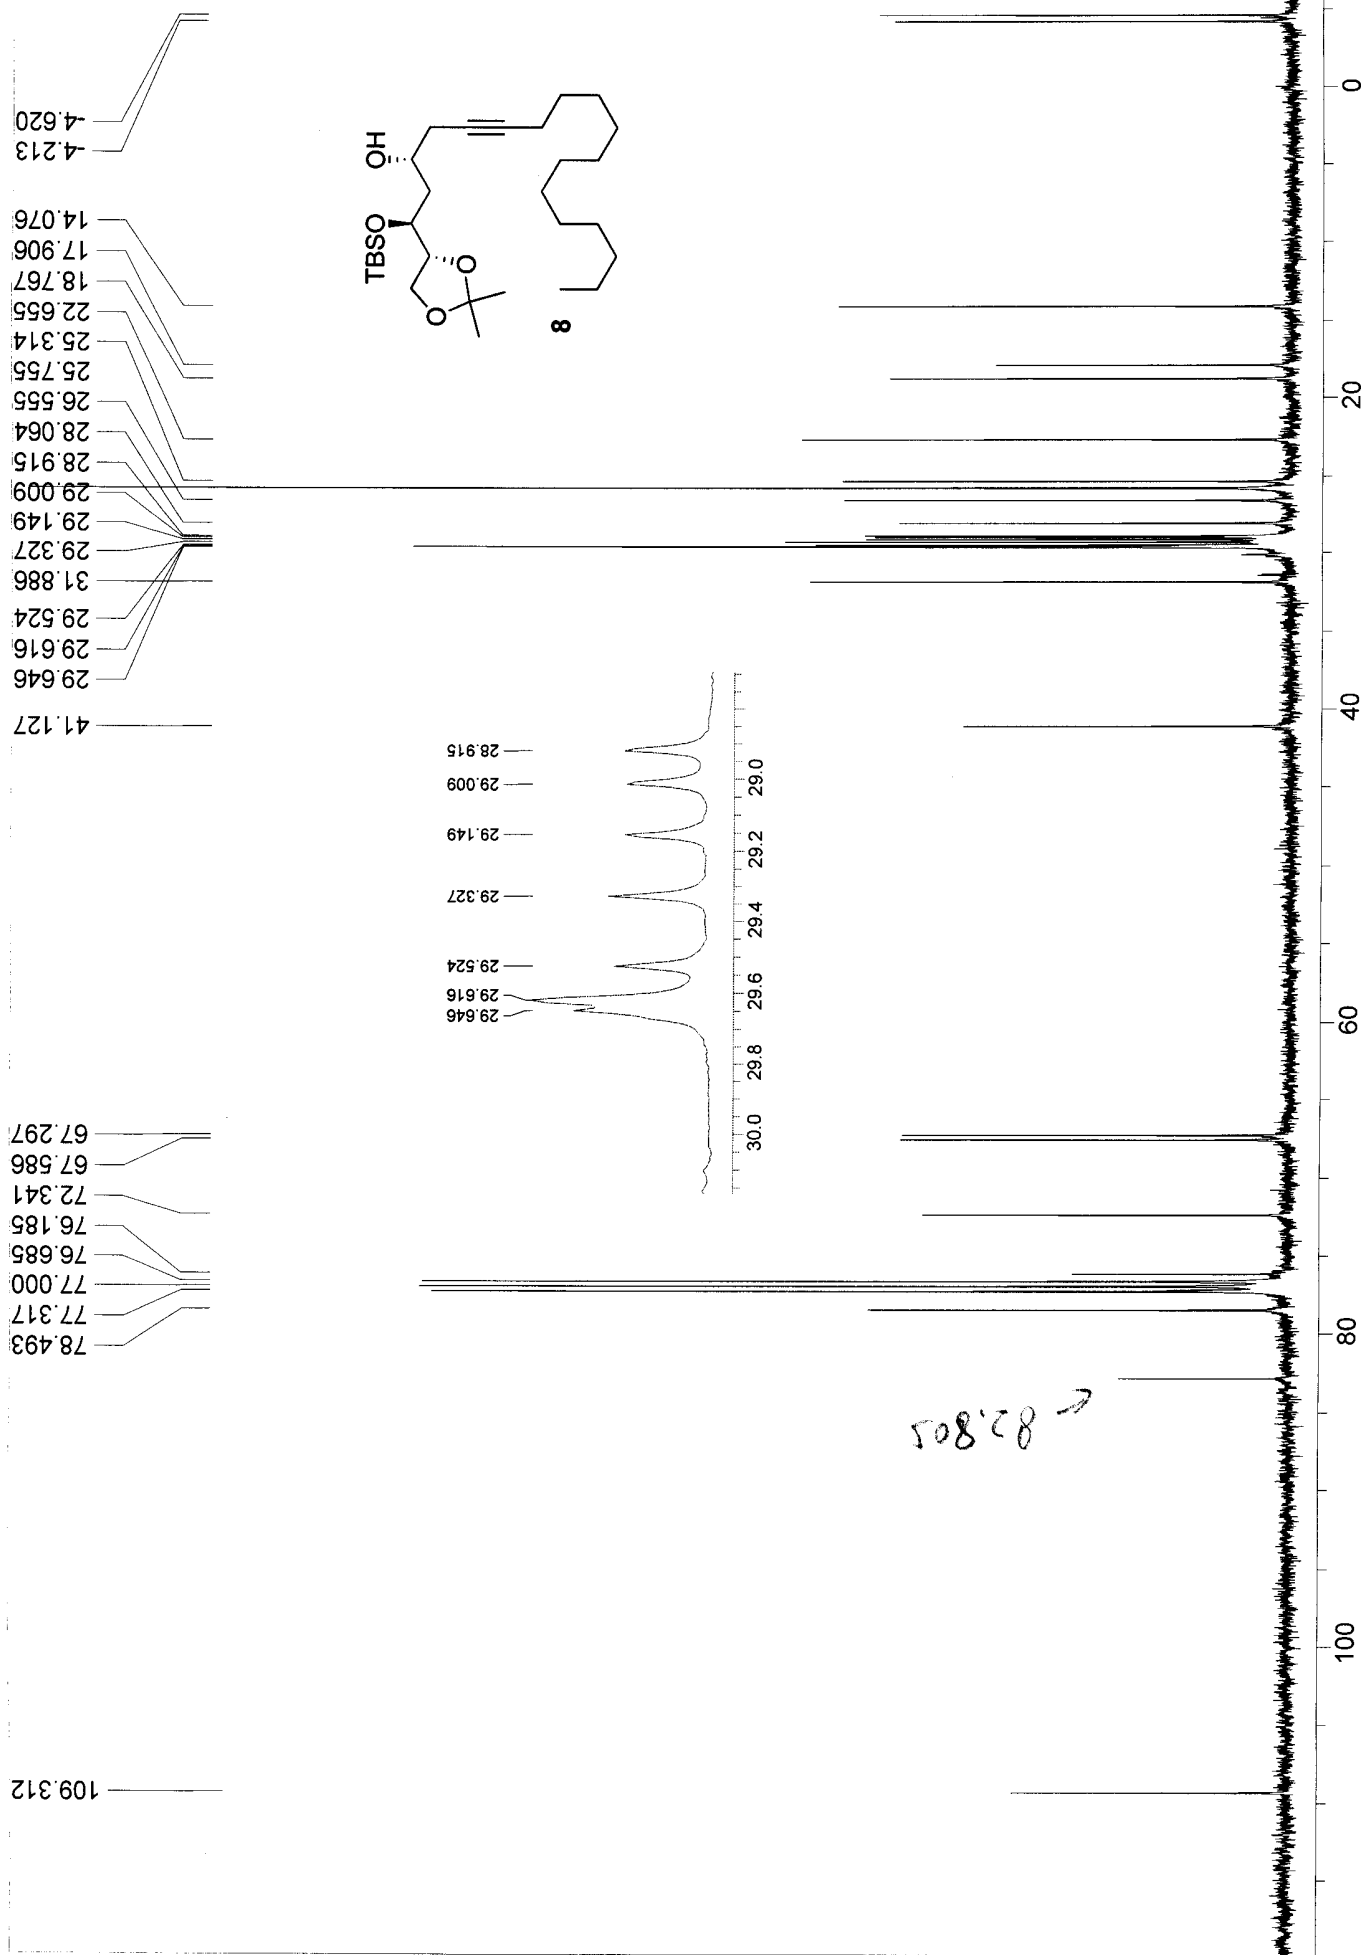

USER: nmr -- DATE: 15:07:55.765 +0800 nmr@EP-ZH107708  
PTSID: 32768  
OF1: 10058.1  
NA: 256  
PD: 2.0 sec  
SW1: 24038  
PW: 8.6 usec  
F1: 100.610  
F2: 1.000  
EX: zgpg30  
LB: 1.0  
Nuts - \$ yx-3-4-2-2c.1

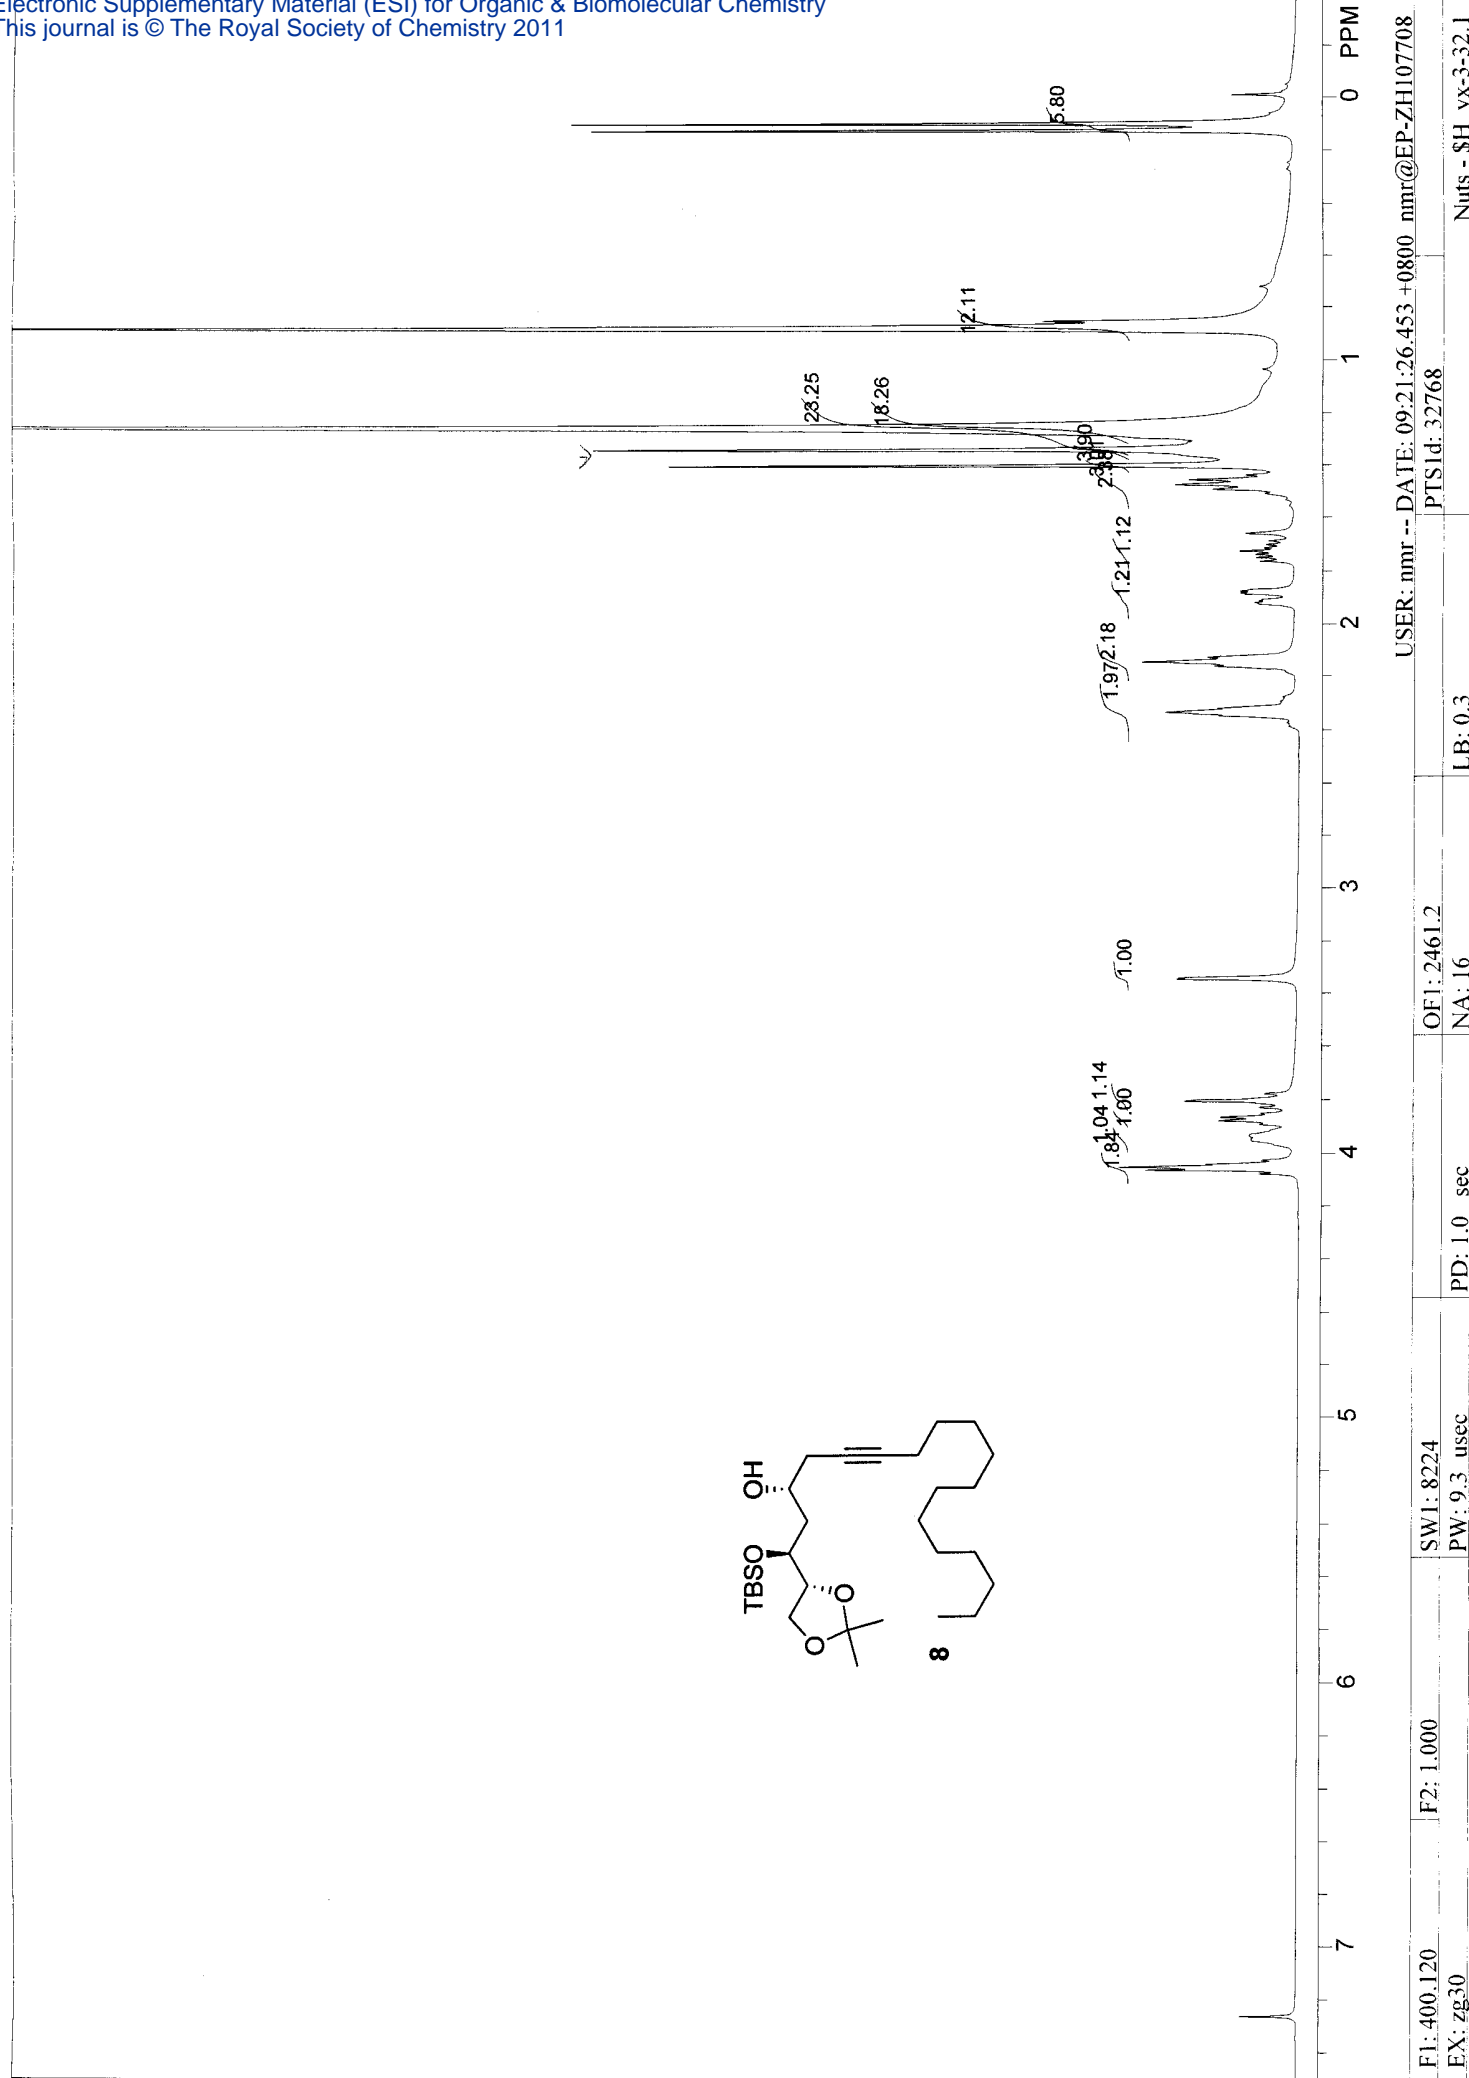

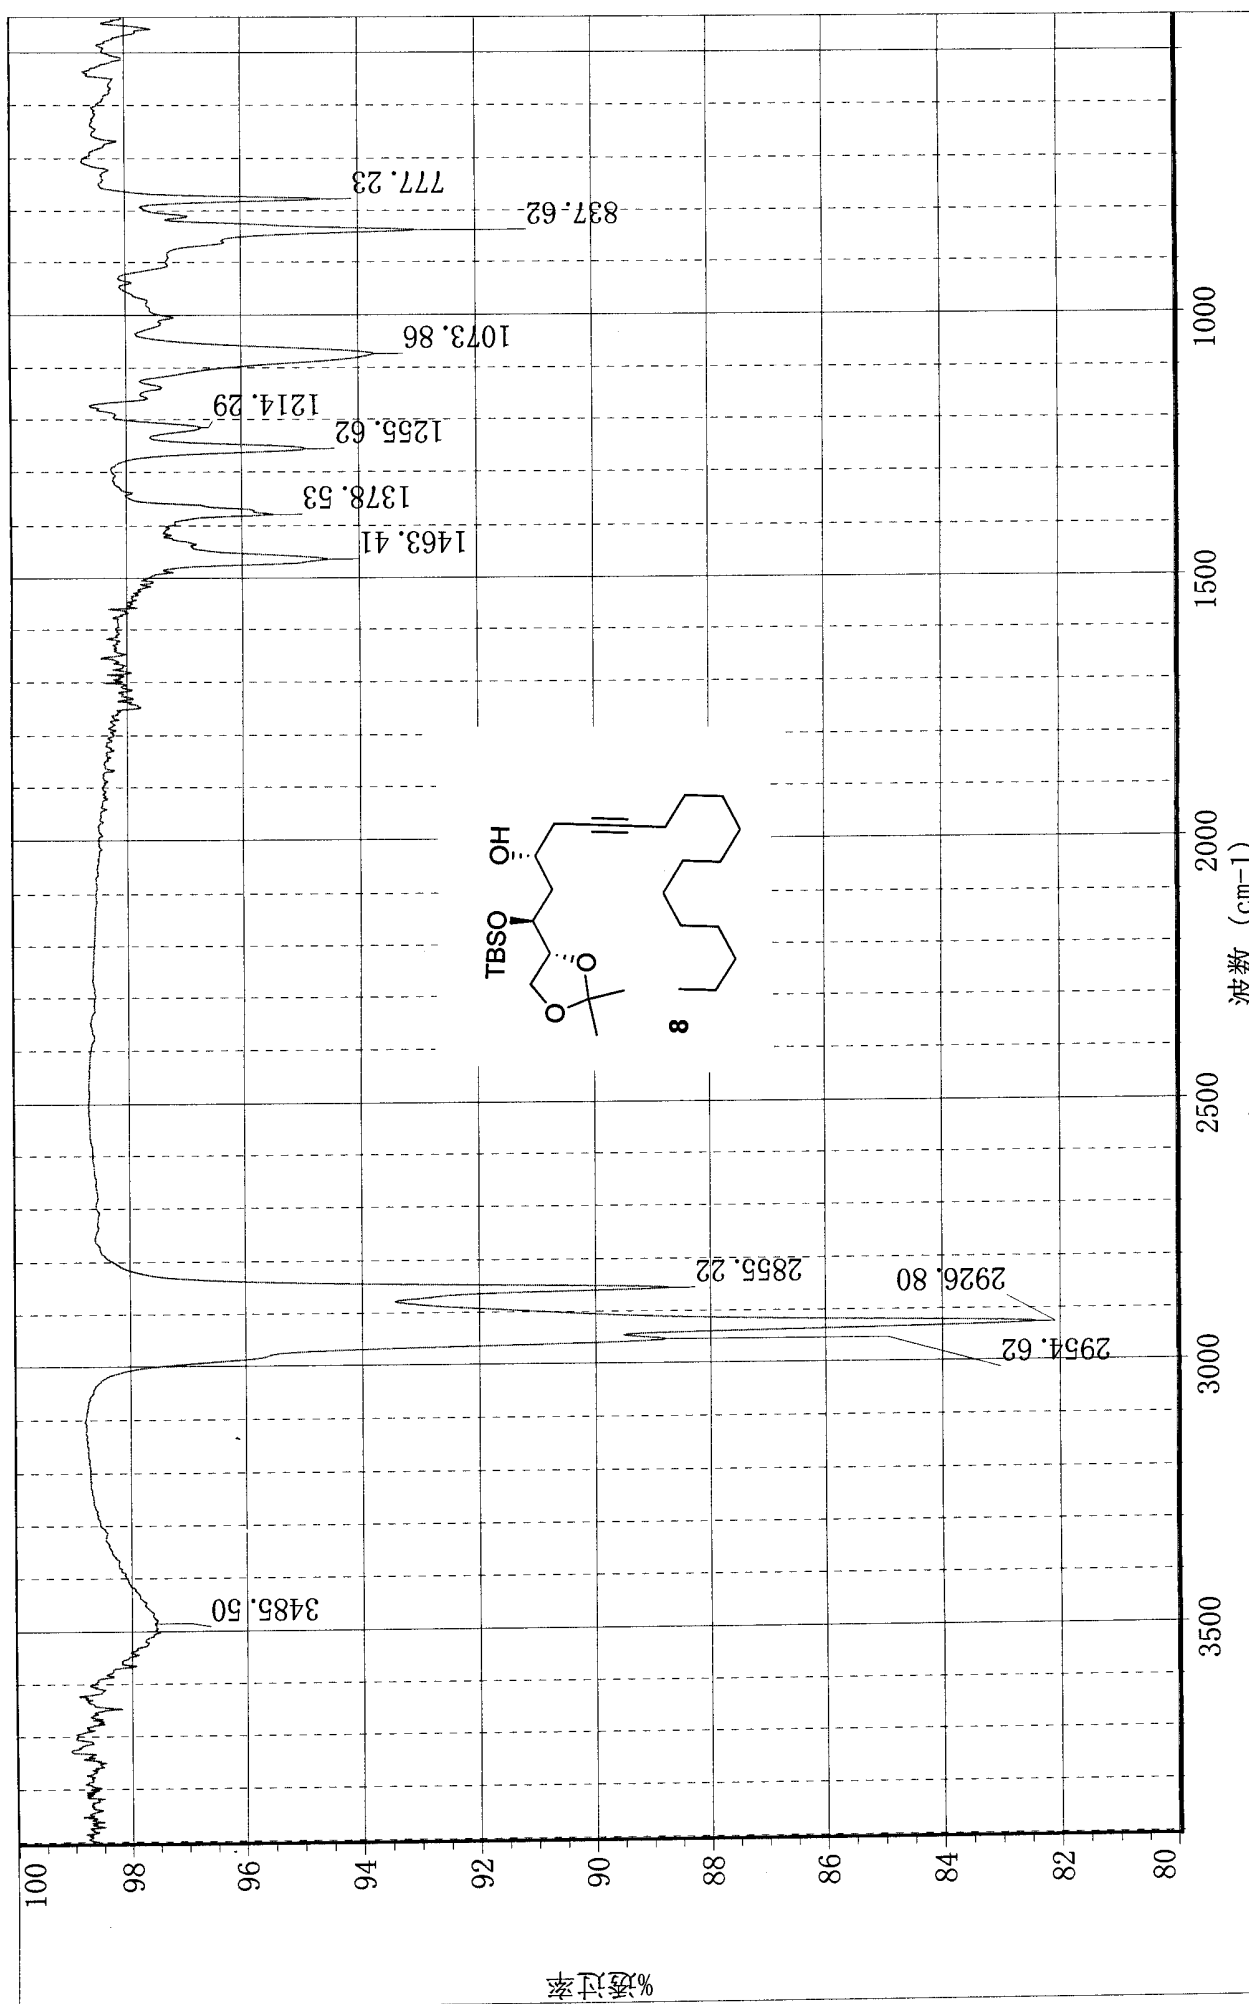

yx-3-25

采集时间: 星期二 12月 14 15:11:41 2010 (GMT+08:00)

2010.12.14 15:11:41

上海有机所生命有机化学国家重点实验室



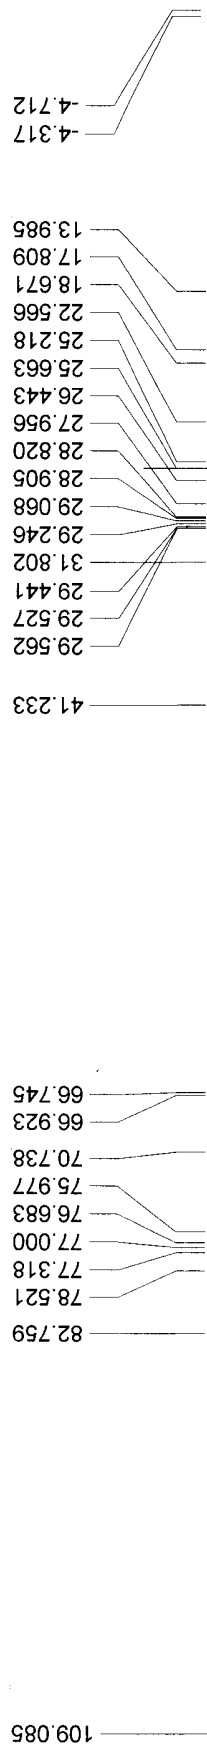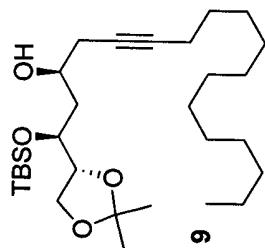

100 MHz, CDCl<sub>3</sub>

S 17

|             |           |              |             |              |         |                                                       |
|-------------|-----------|--------------|-------------|--------------|---------|-------------------------------------------------------|
| F1: 100.610 | F2: 1.000 | SWH: 24038   | PD: 2.0 sec | OF1: 10053.0 | LB: 1.0 | USER: mmr -- DATE: 10:47:21.625 +0800_nmr@EP-ZH107708 |
| EX: zgpg30  |           | PW: 8.6 usec | NA: 128     | PTSId: 32768 |         | Nuts - \$新建文件火_yx-3-44c.1                             |

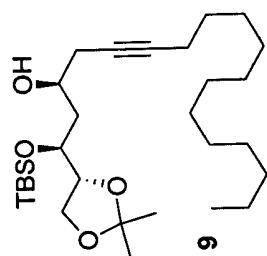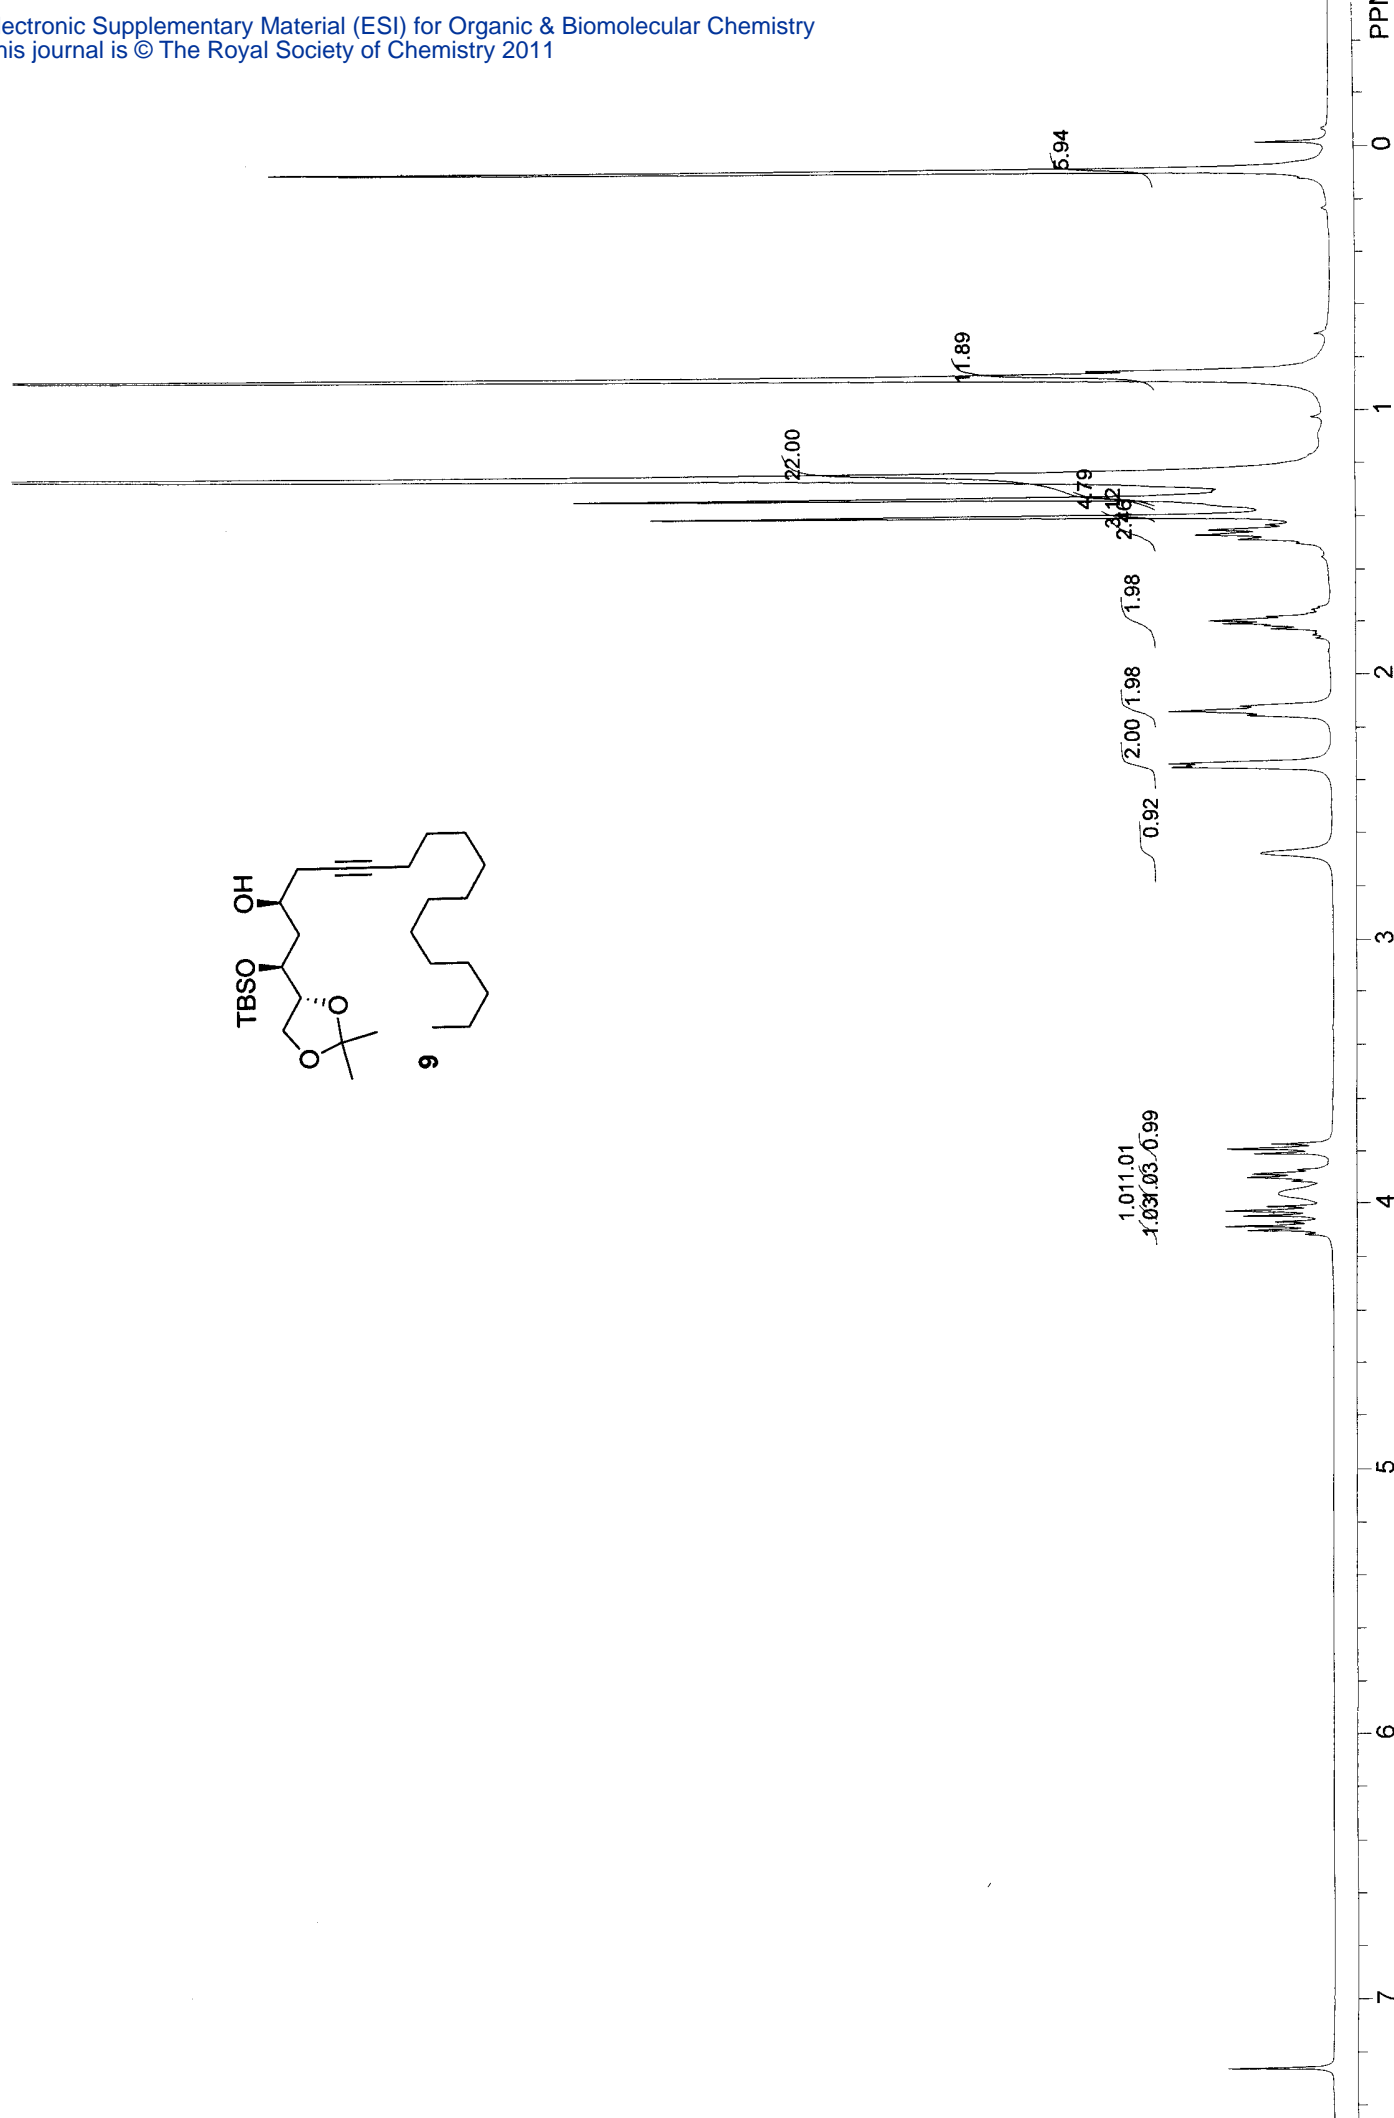

USER: nmr -- DATE: 16:53:53.468 +0800 nmr@EP-ZHI07708  
PTSD: 32768

OF1: 2461.1

SW1: 8224

F2: 1.000

I: 400.120

YX-3-644

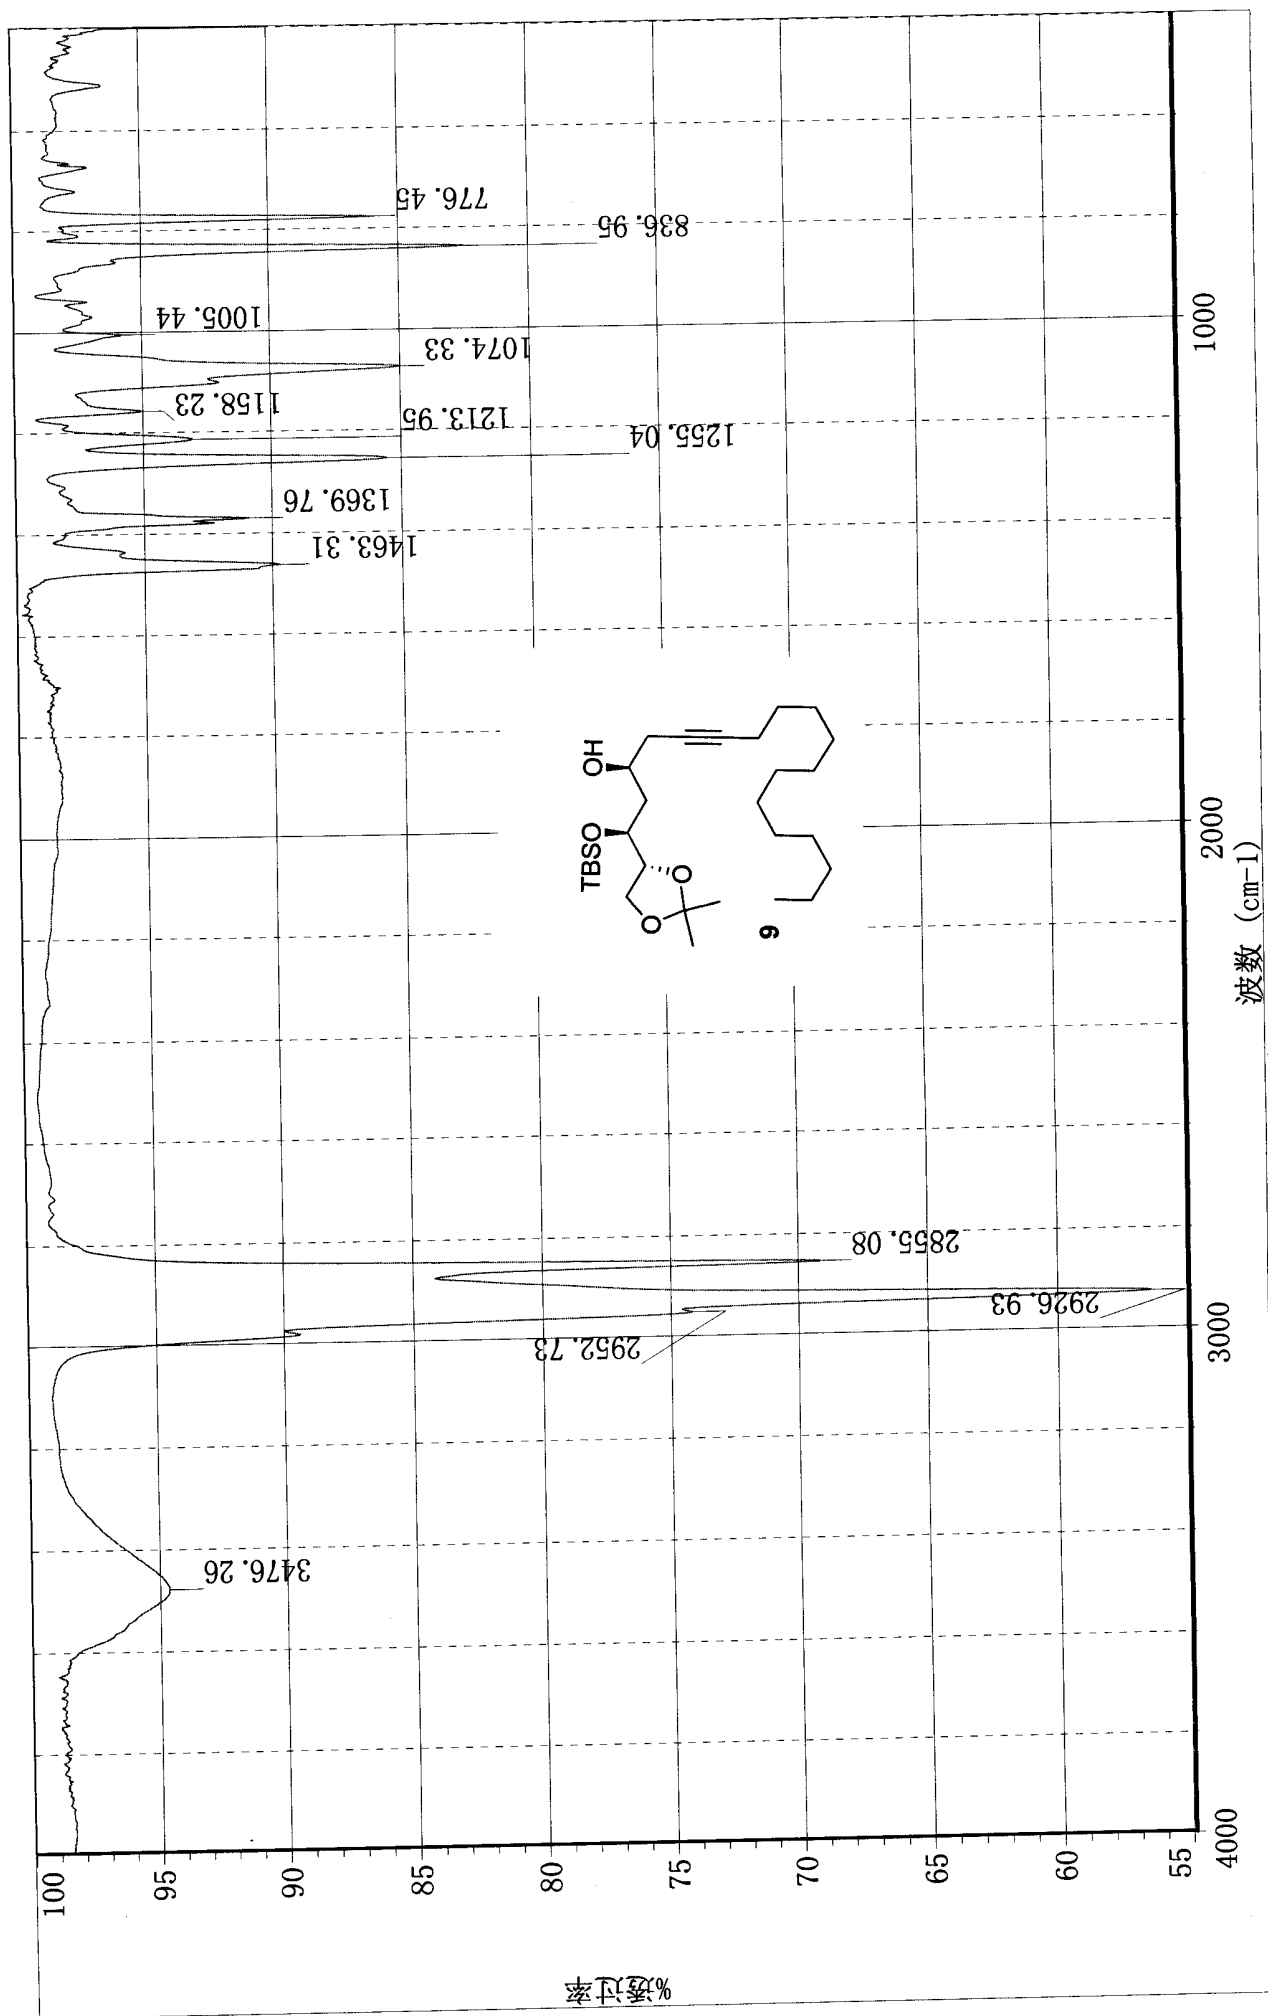

\*\*\*yx-3-44

采集时间: 星期四 4月 07 21:42:31 2011 (GMT+08:00)

上海有机所生命有机化学国家重点实验室

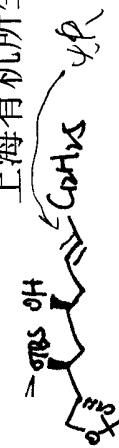

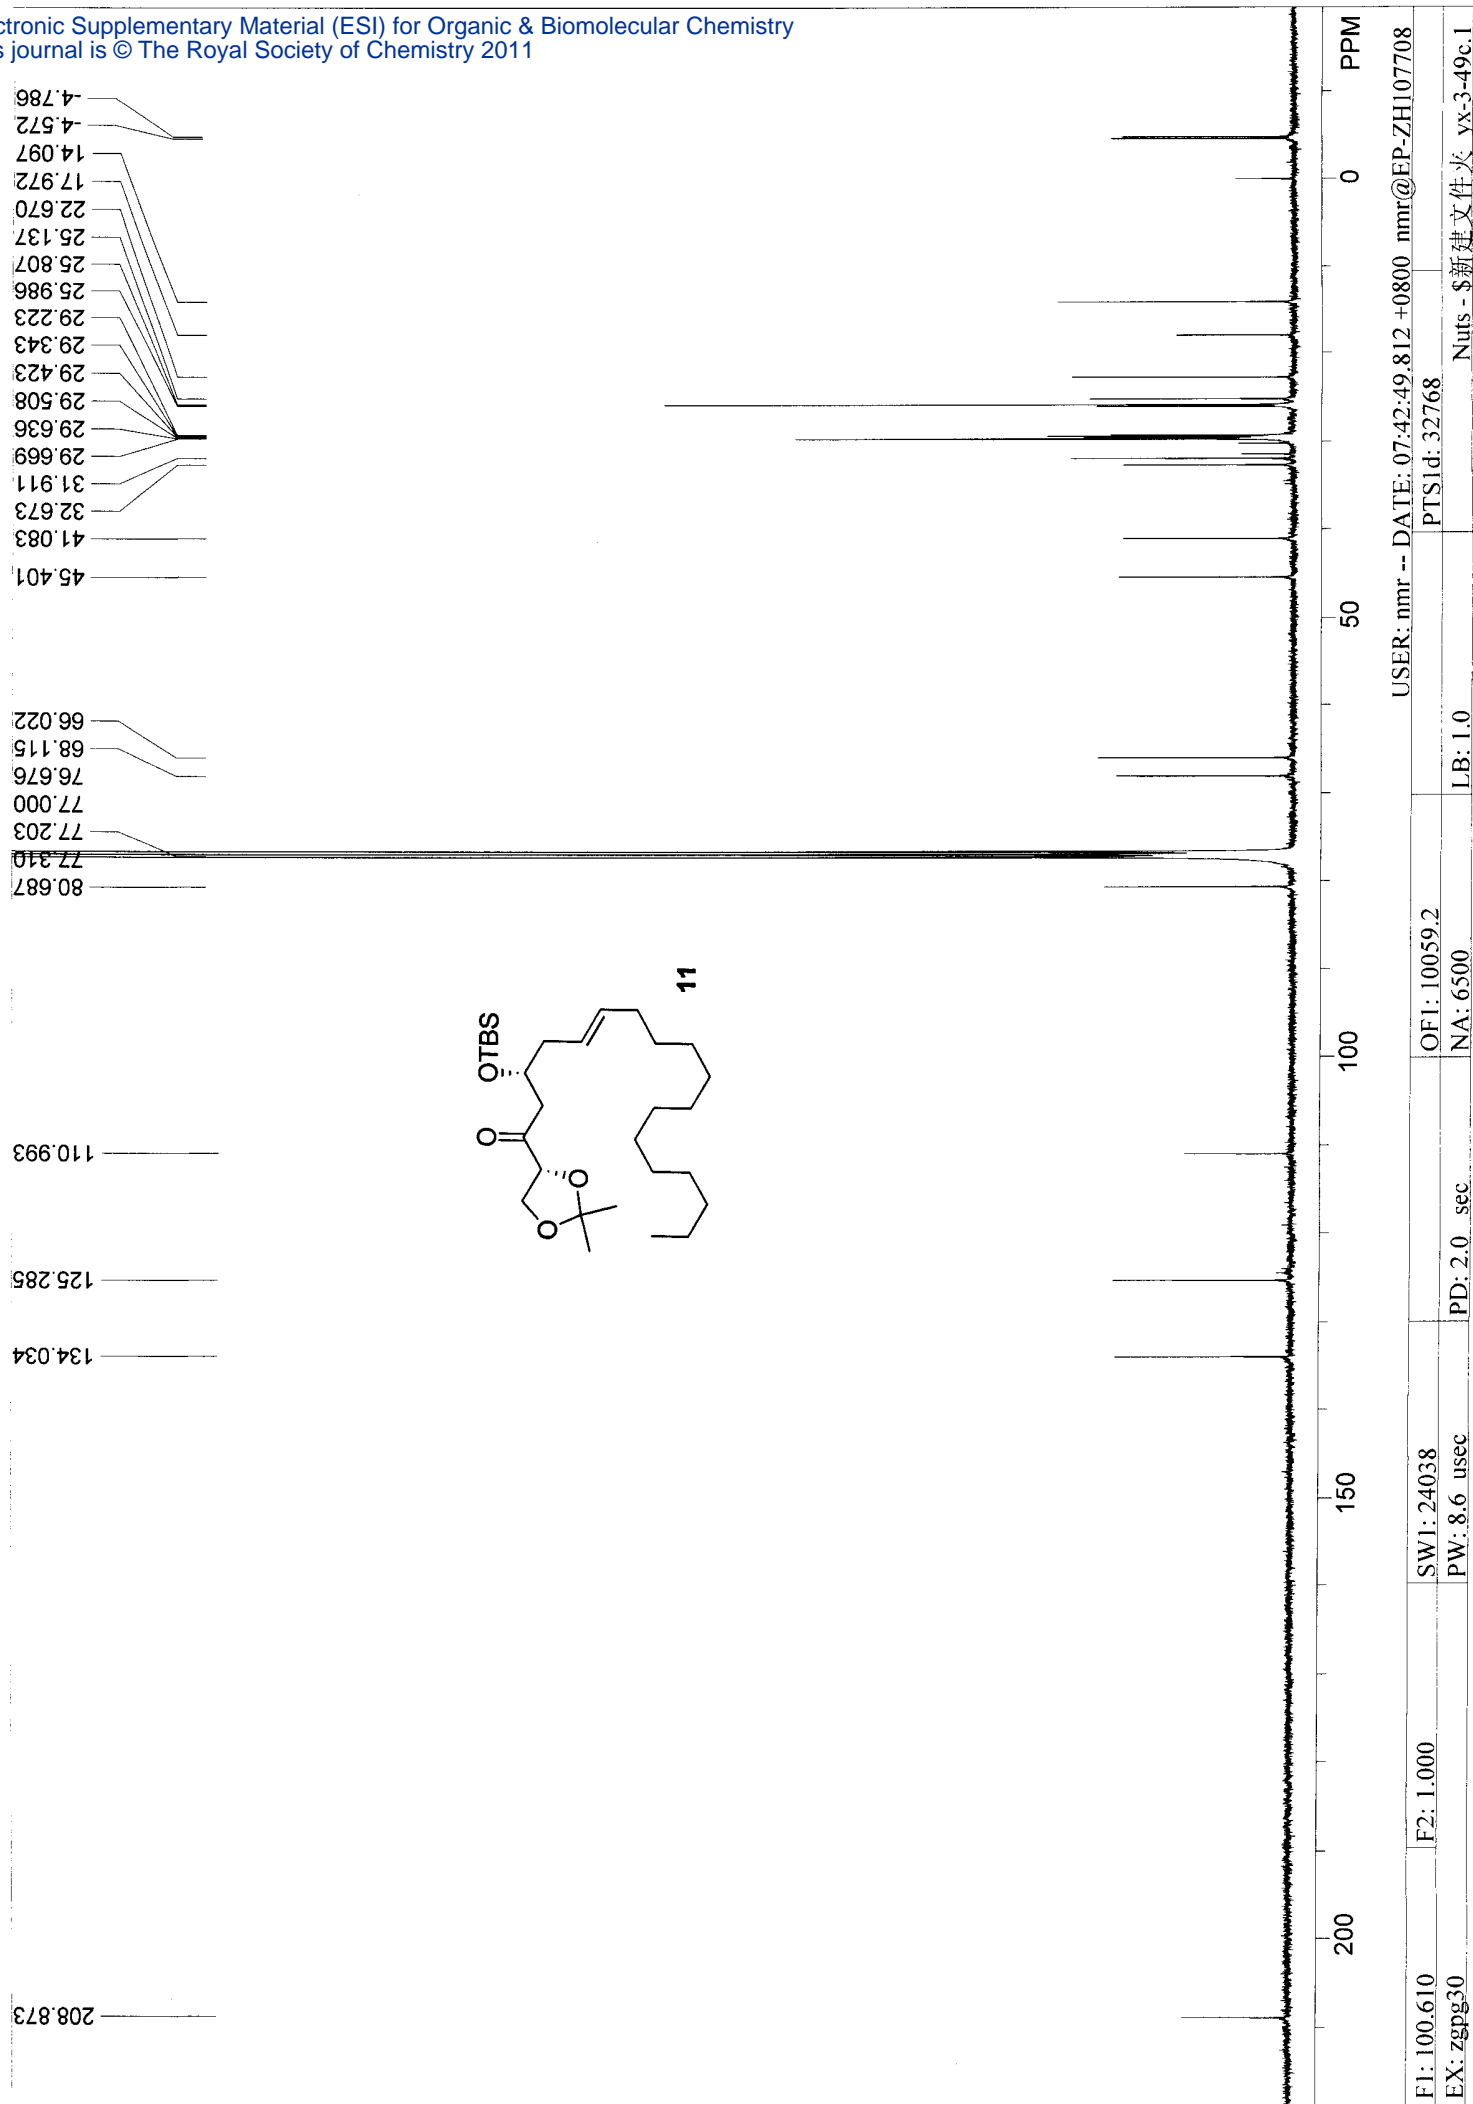

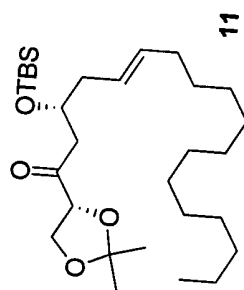

11

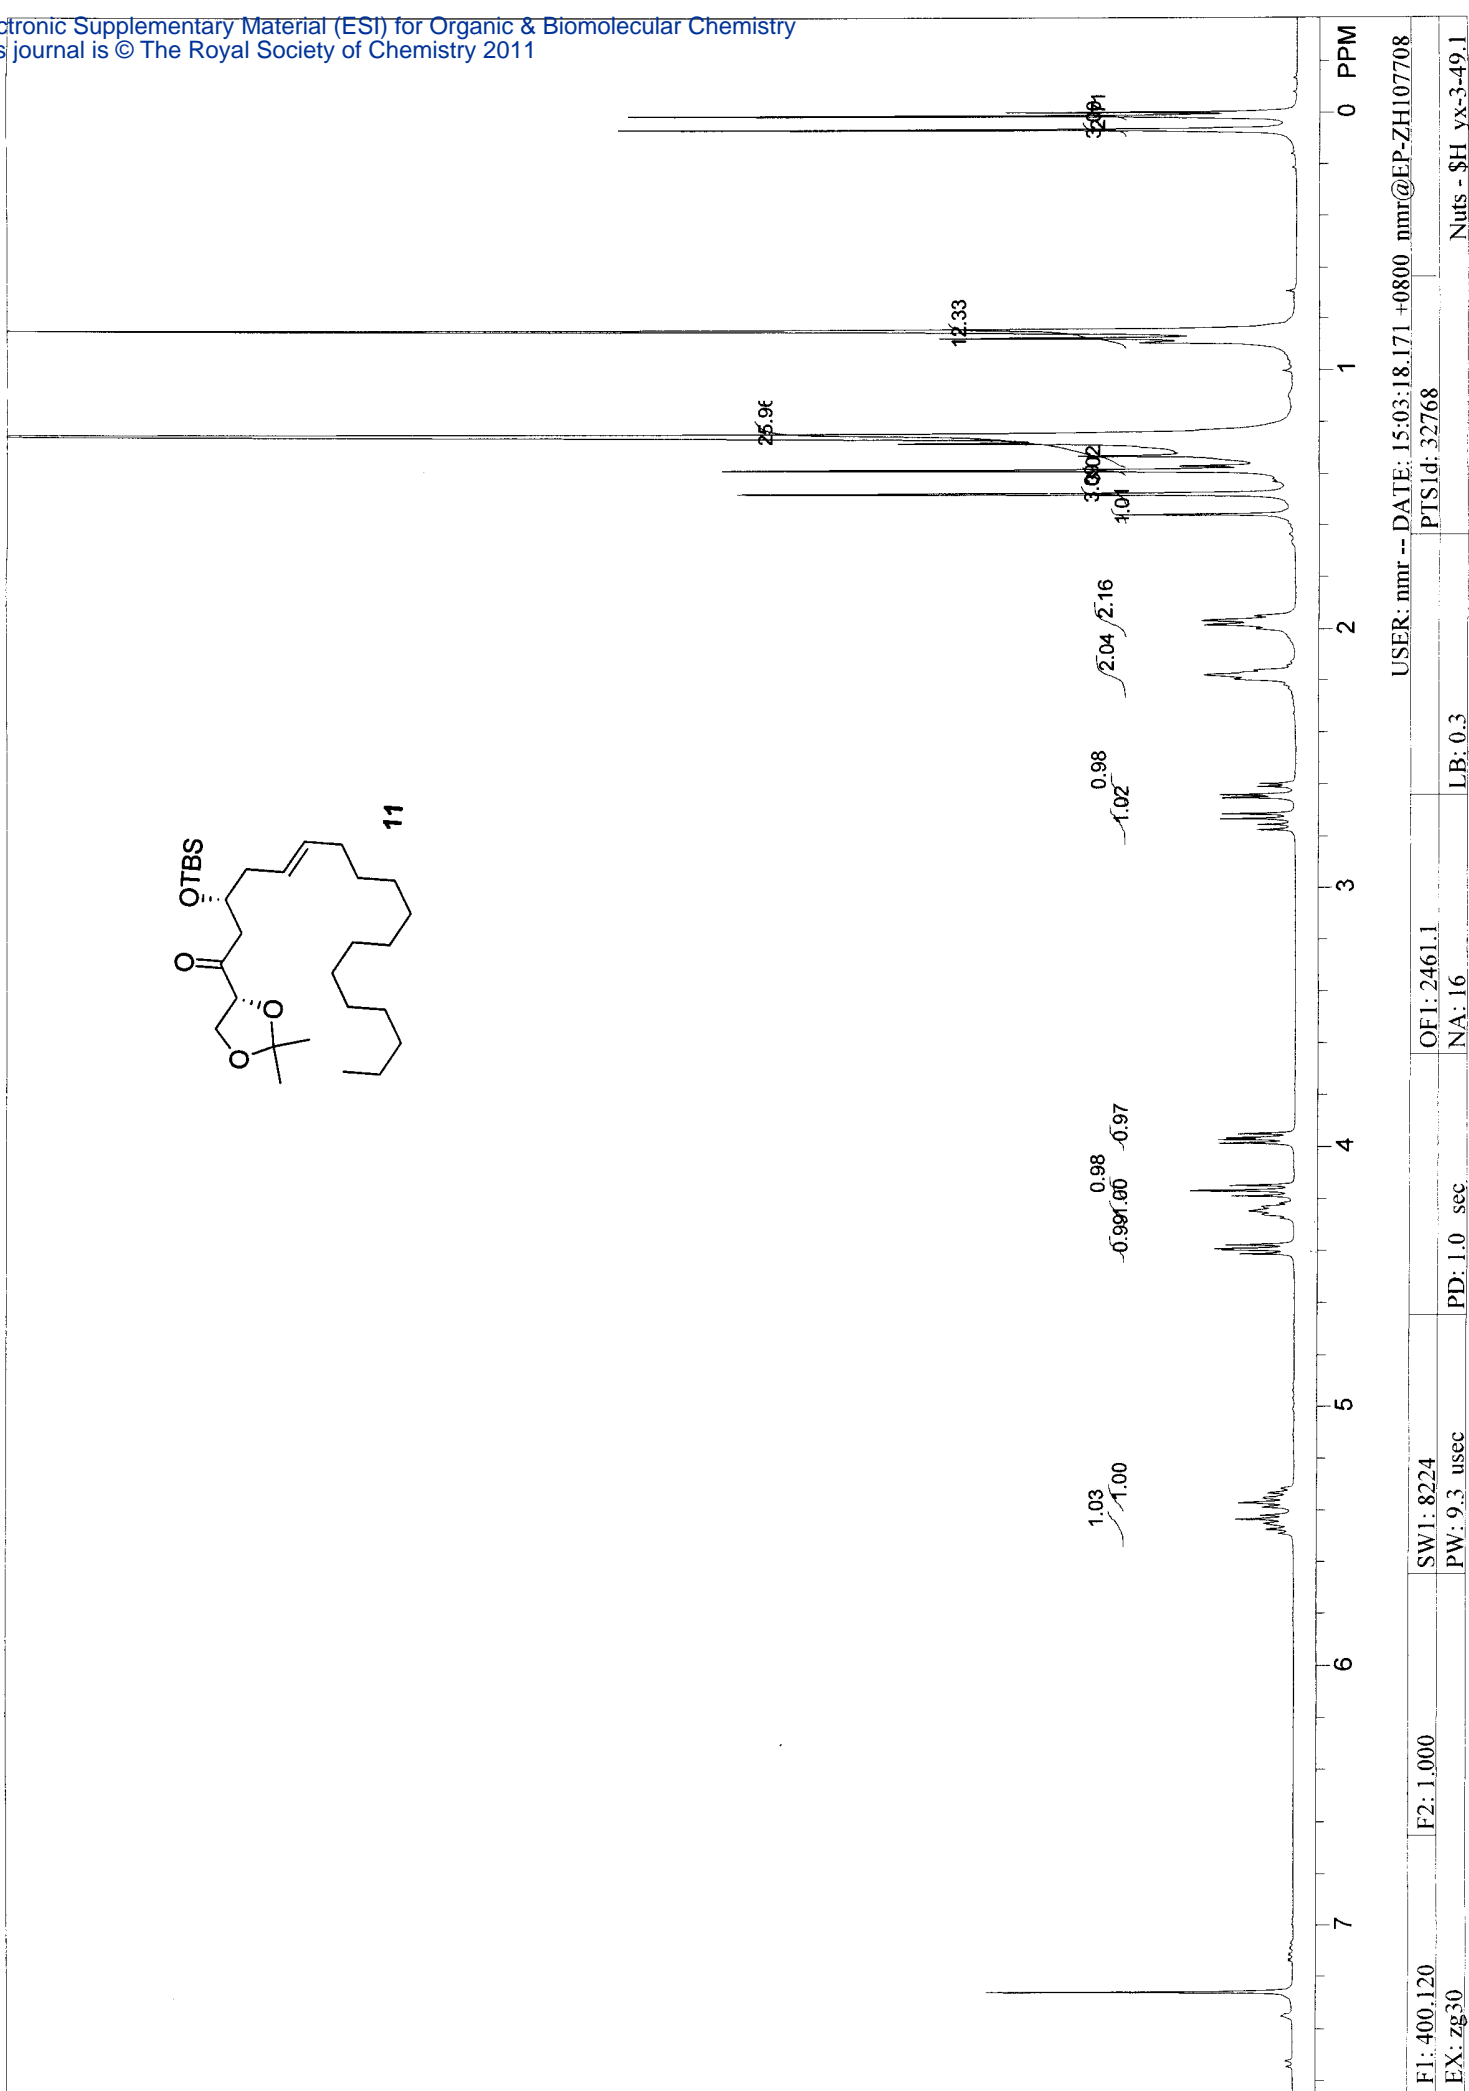

USER: nmr -- DATE: 15:03:18.171 +0800 nmr@EP-ZH107708

PTSID: 32768

OF1: 2461.1

NA: 16

PD: 1.0 sec

SW1: 8224

PW: 9.3 usec

F2: 1,000

F1: 400,120

EX: zg30

LB: 0.3

Nuts - \$H\_yx-3-49.1

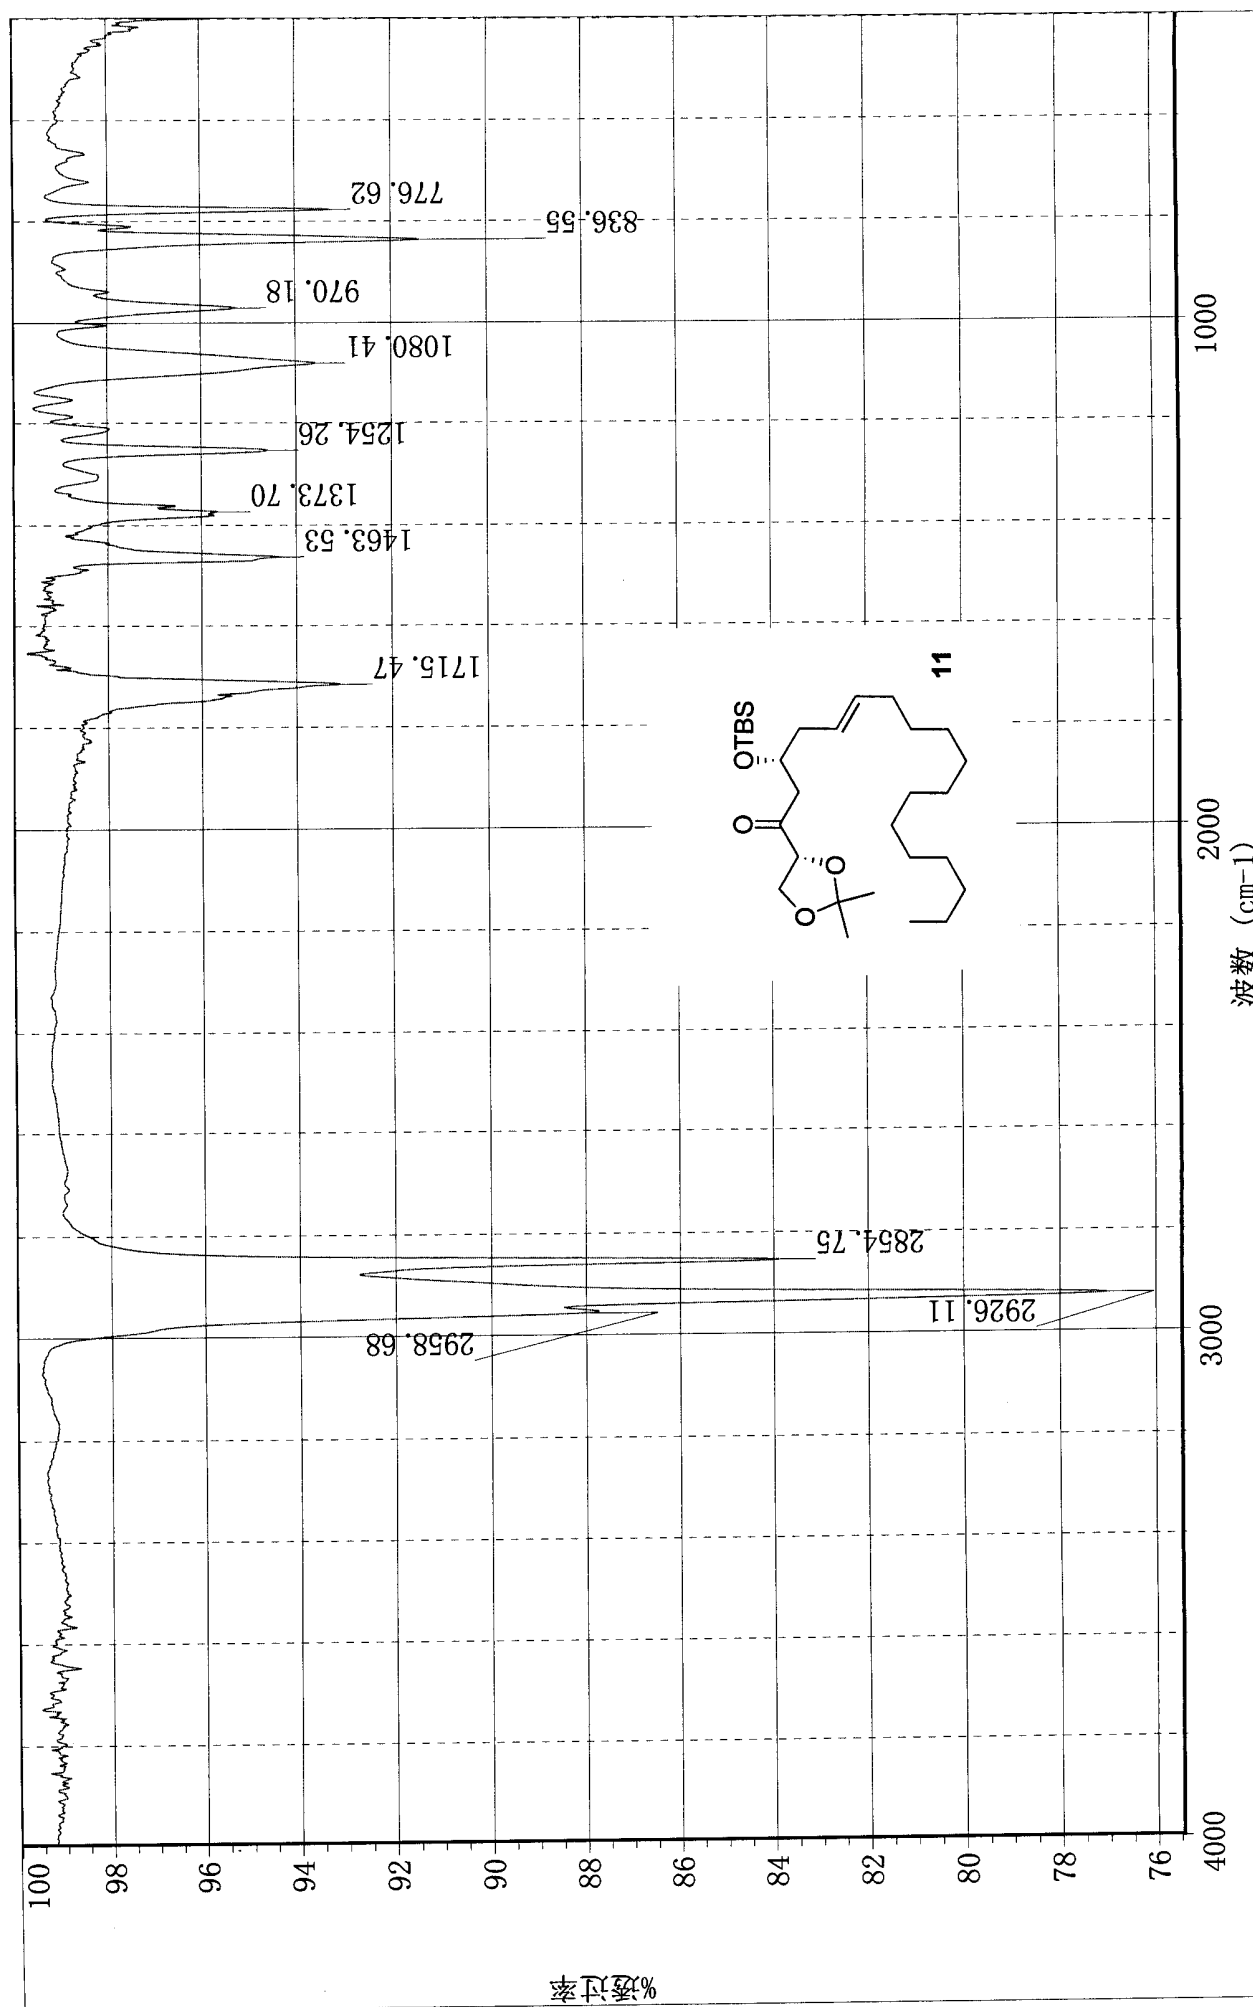

\*\*yx-3-49

采集时间: 星期五 4月 01 18:52:59 2011 (GMT+08:00)

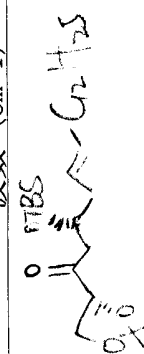

上海有机所生命有机化学国家重点实验室

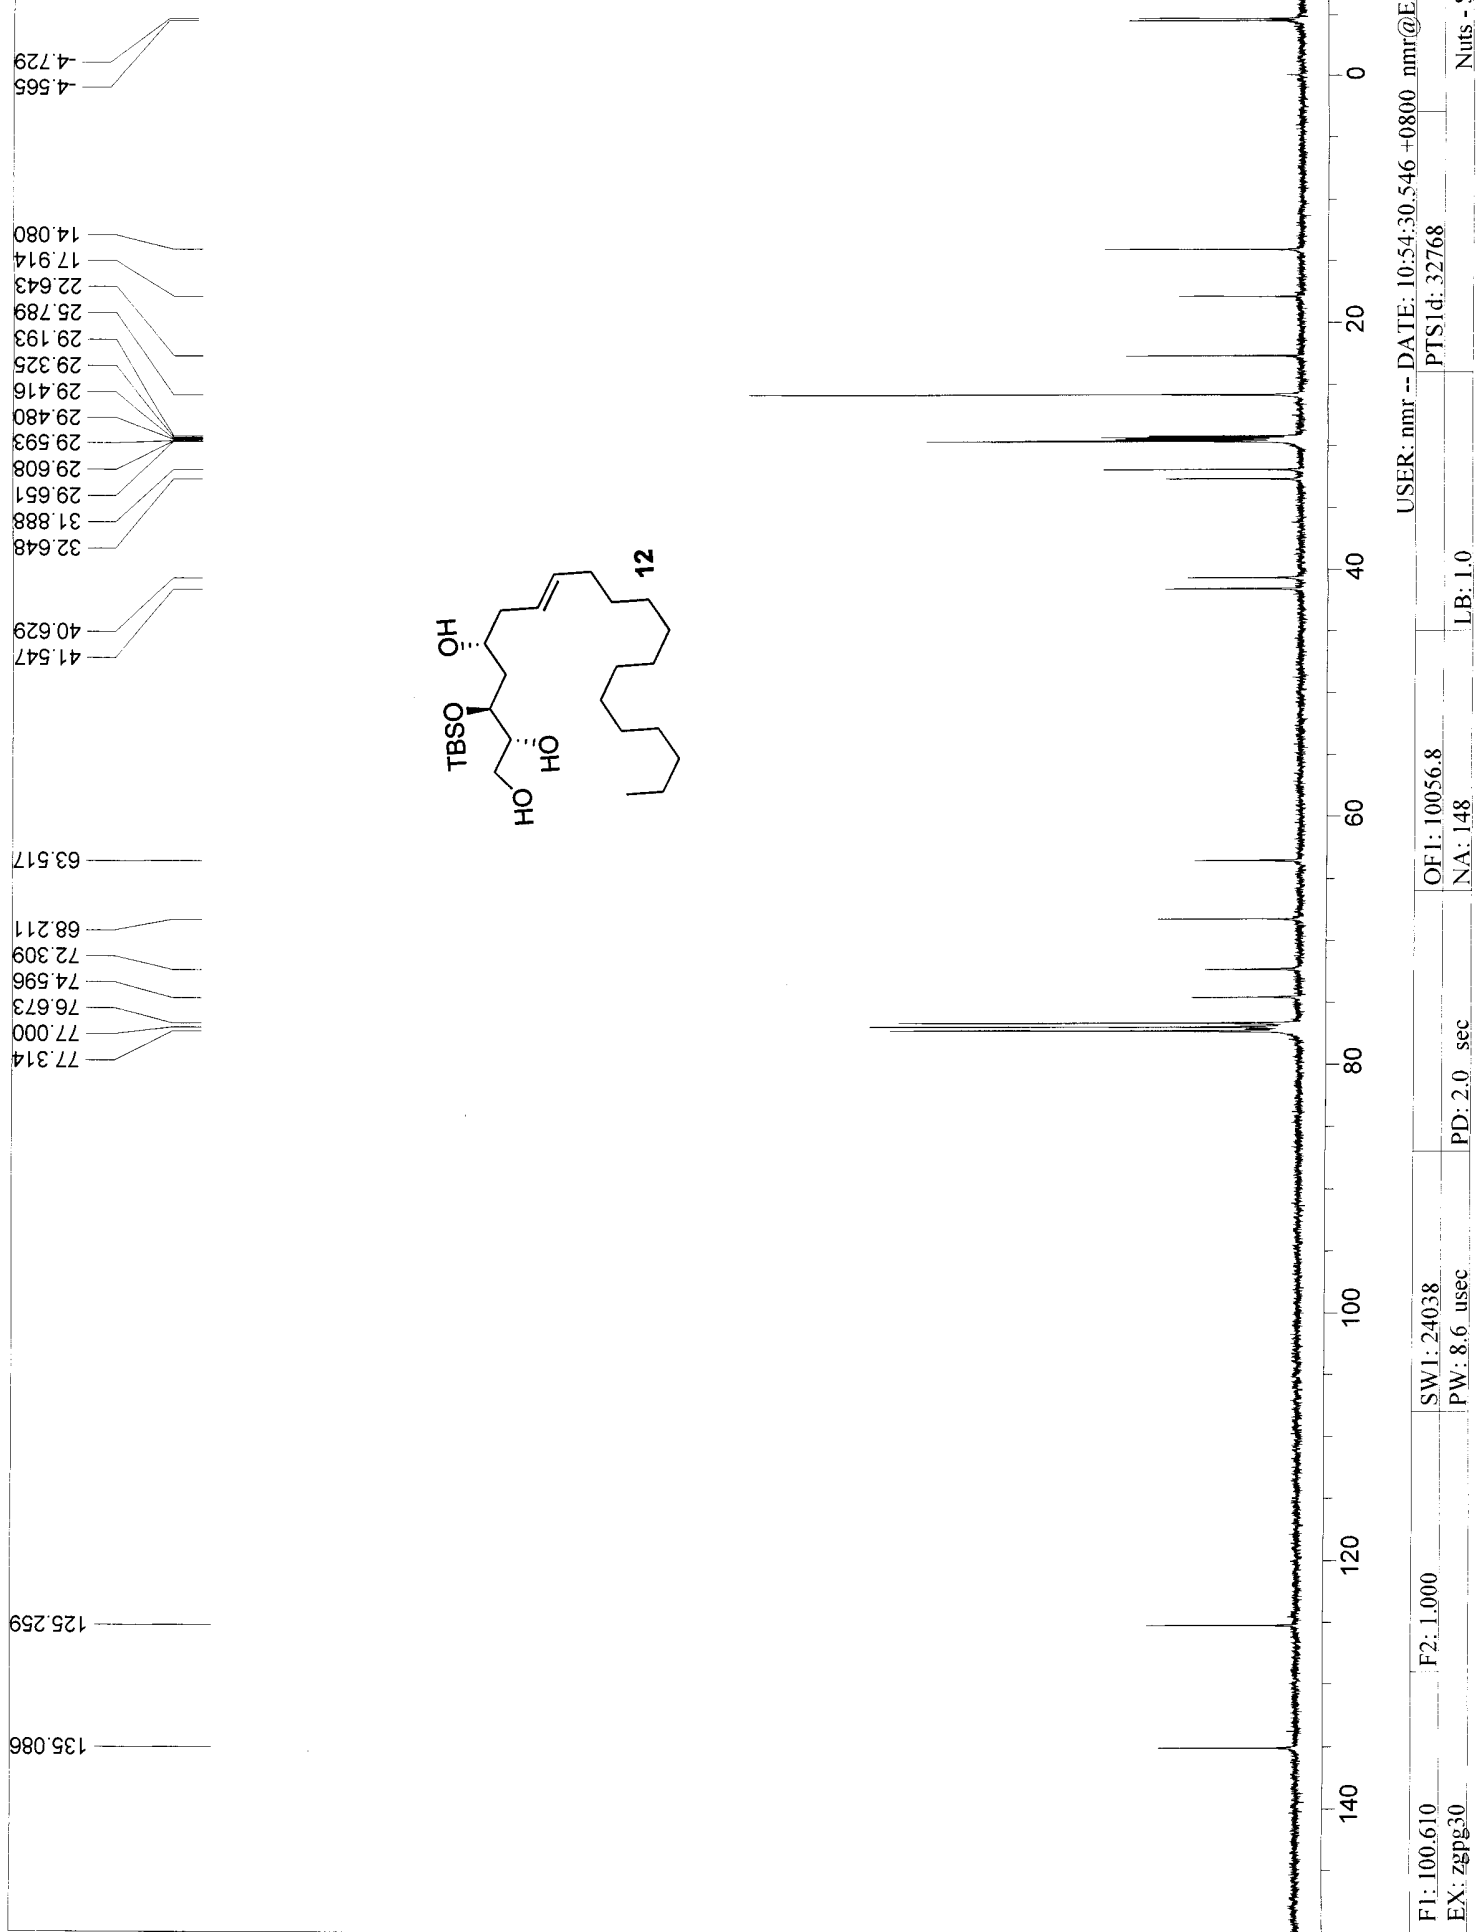

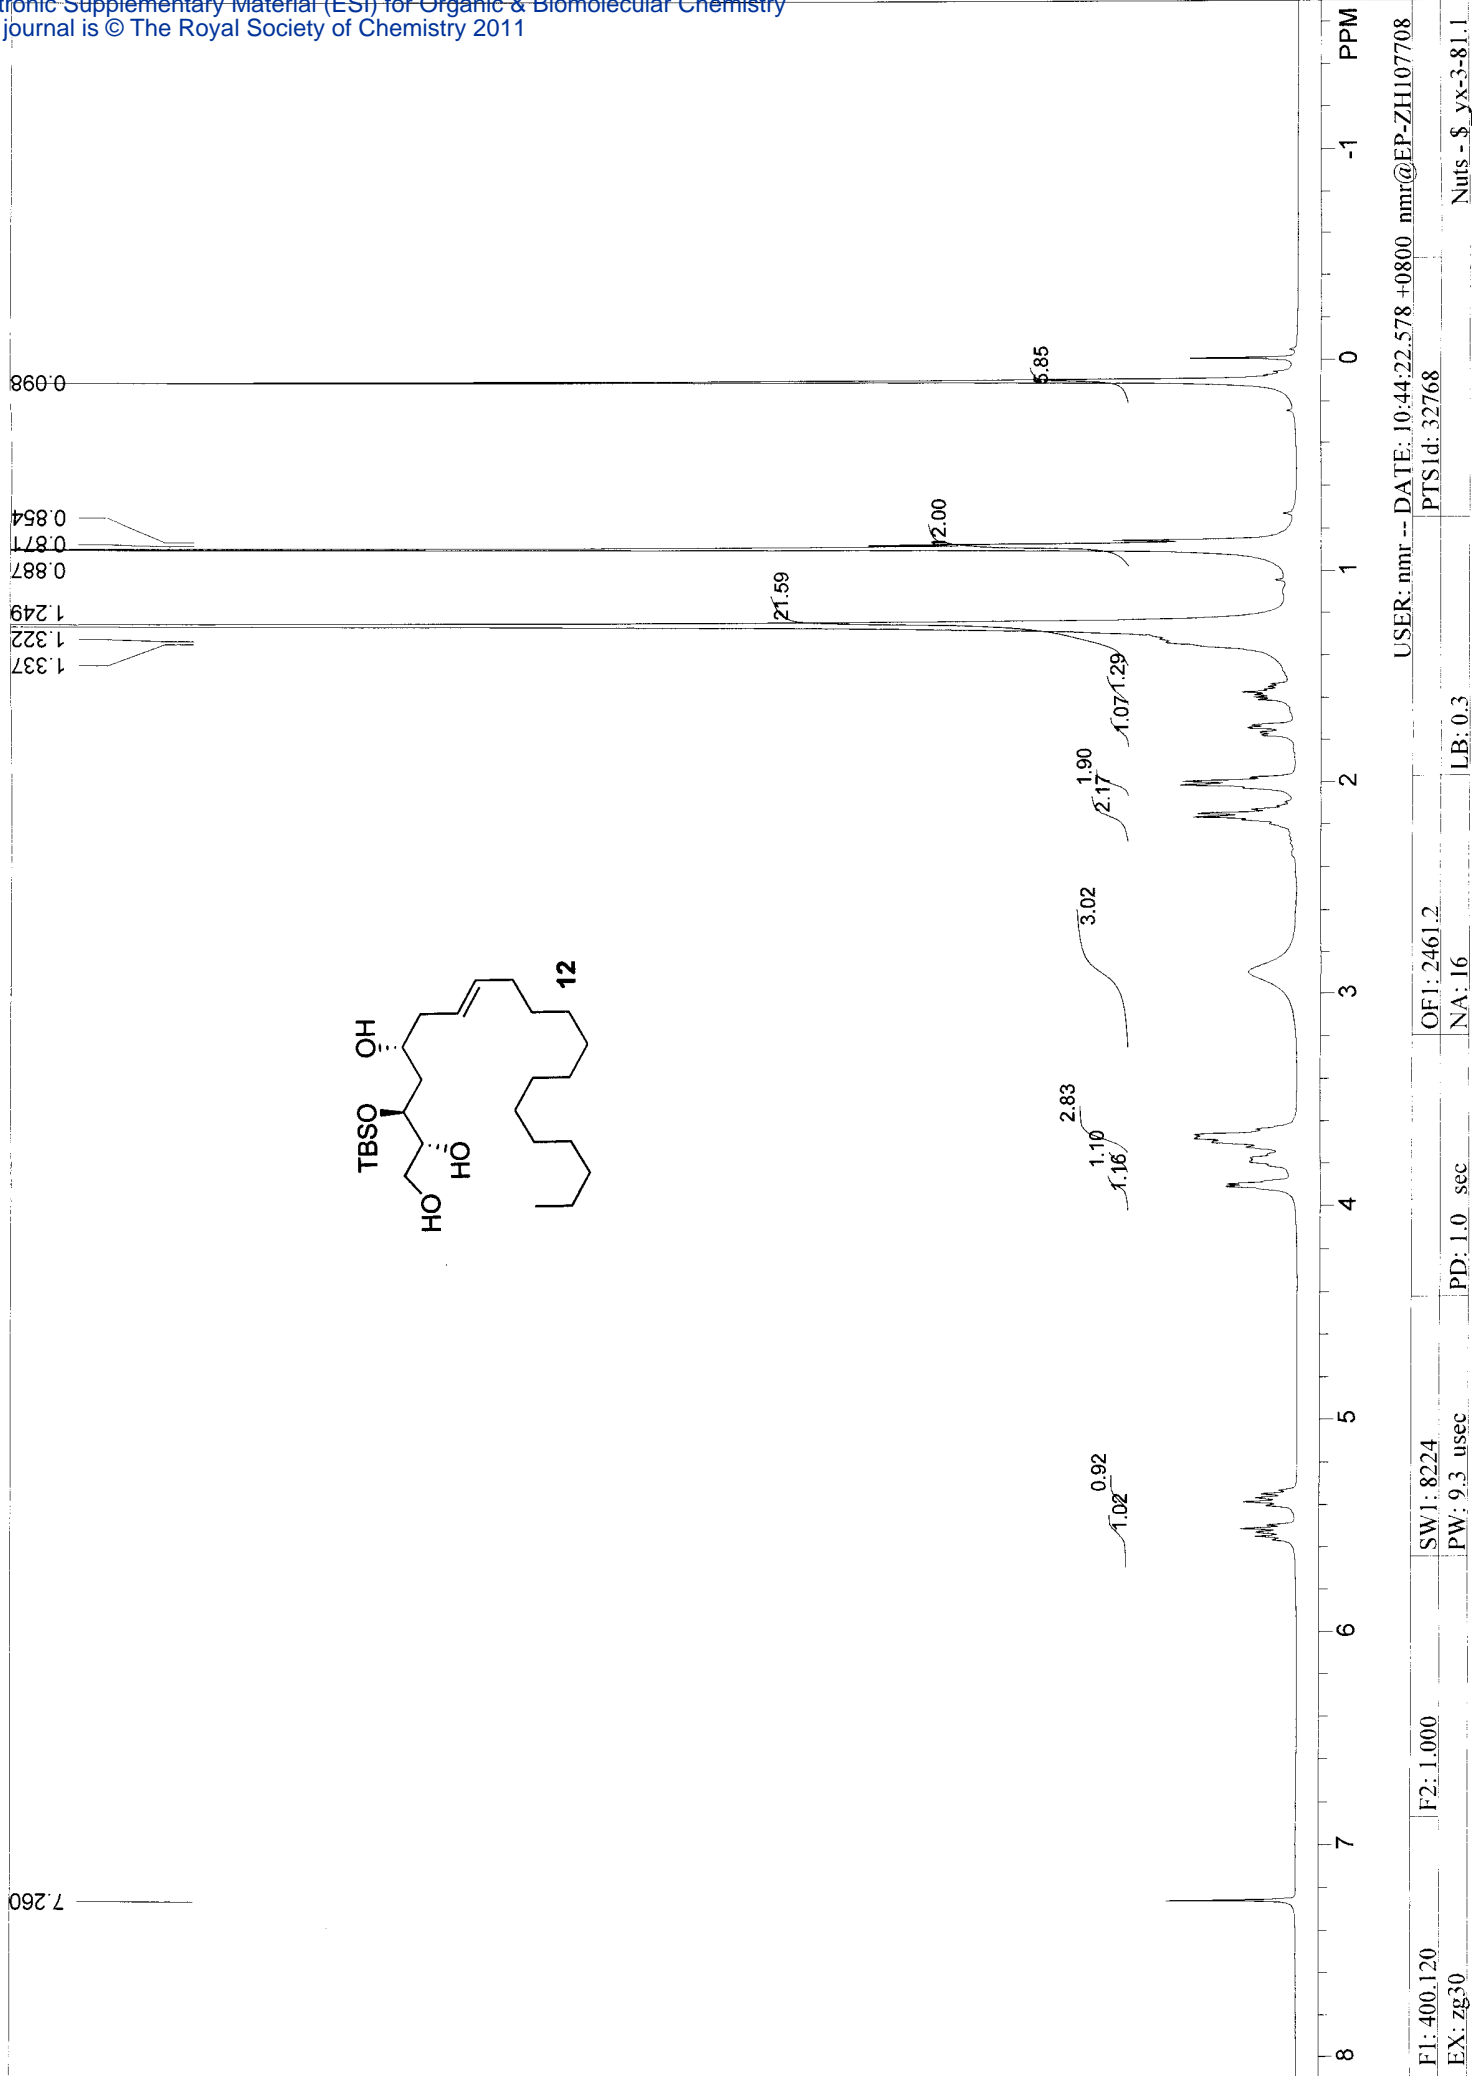



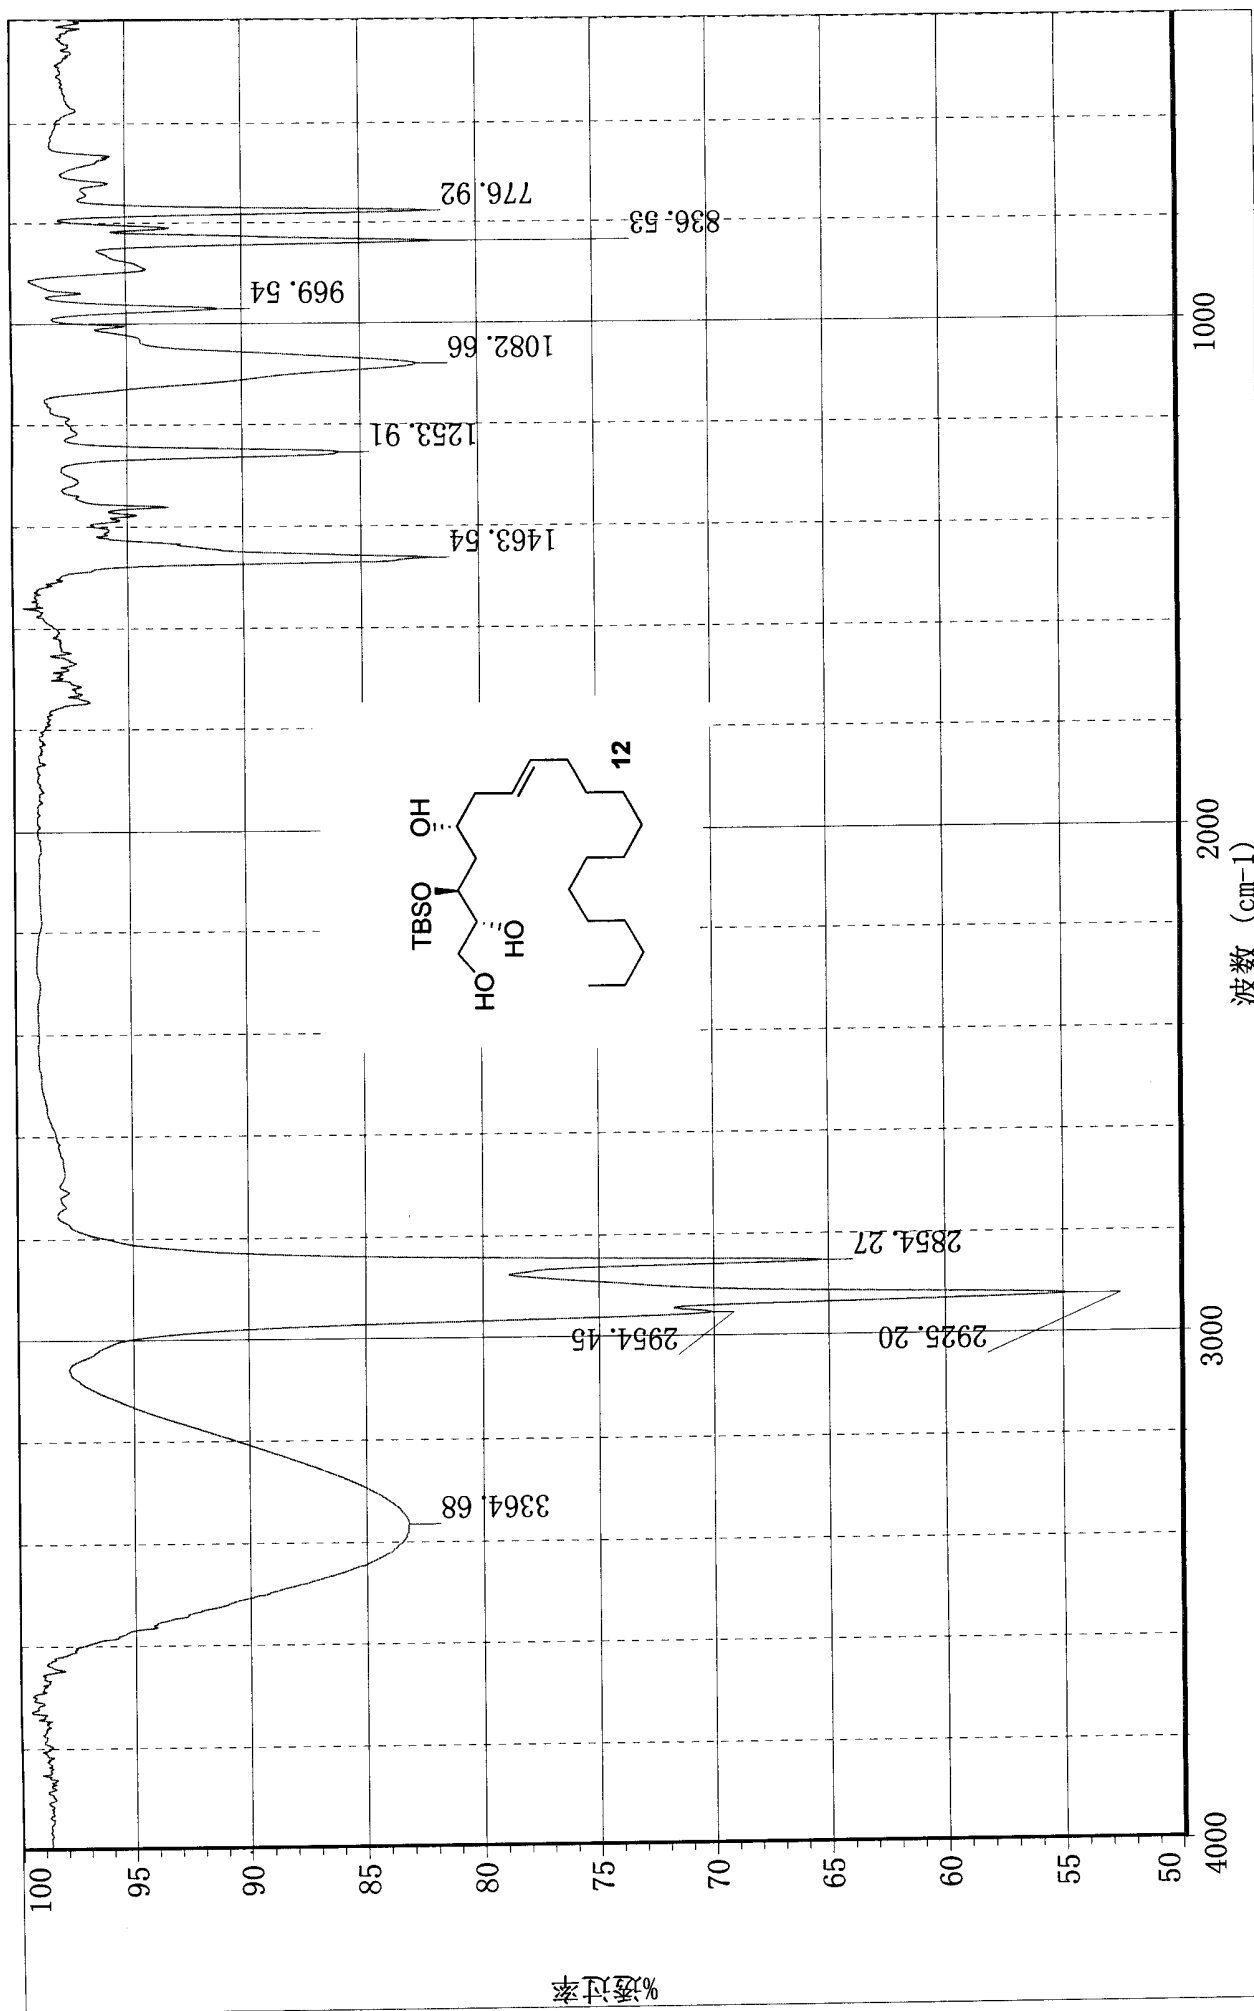

\*yx-3-81

采集时间: 星期五 4月 01 19:04:51 2011 (GMT+08:00)

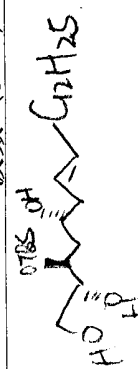

上海有机所生命有机化学国家重点实验室

5.431  
5.385

14.083  
18.249  
22.665  
25.847  
29.190  
29.334  
29.444  
29.476  
29.621  
29.658  
31.895  
32.647  
38.379  
40.990

67.196  
68.221  
69.405  
76.673  
77.000  
77.314

125.609

134.651

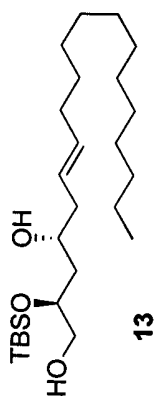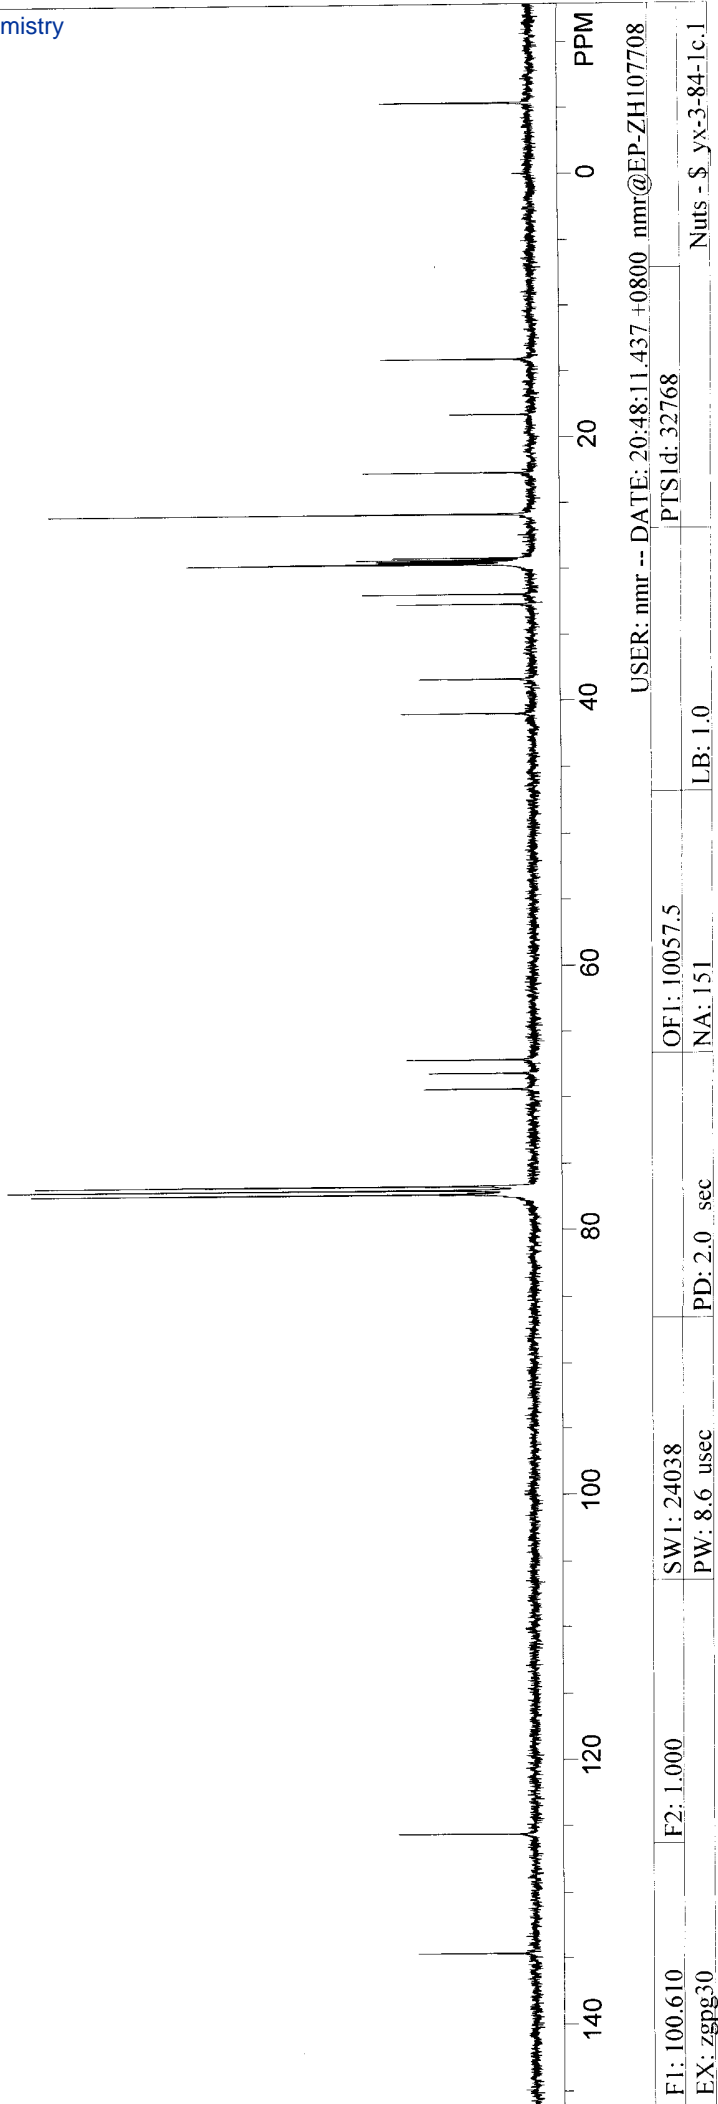

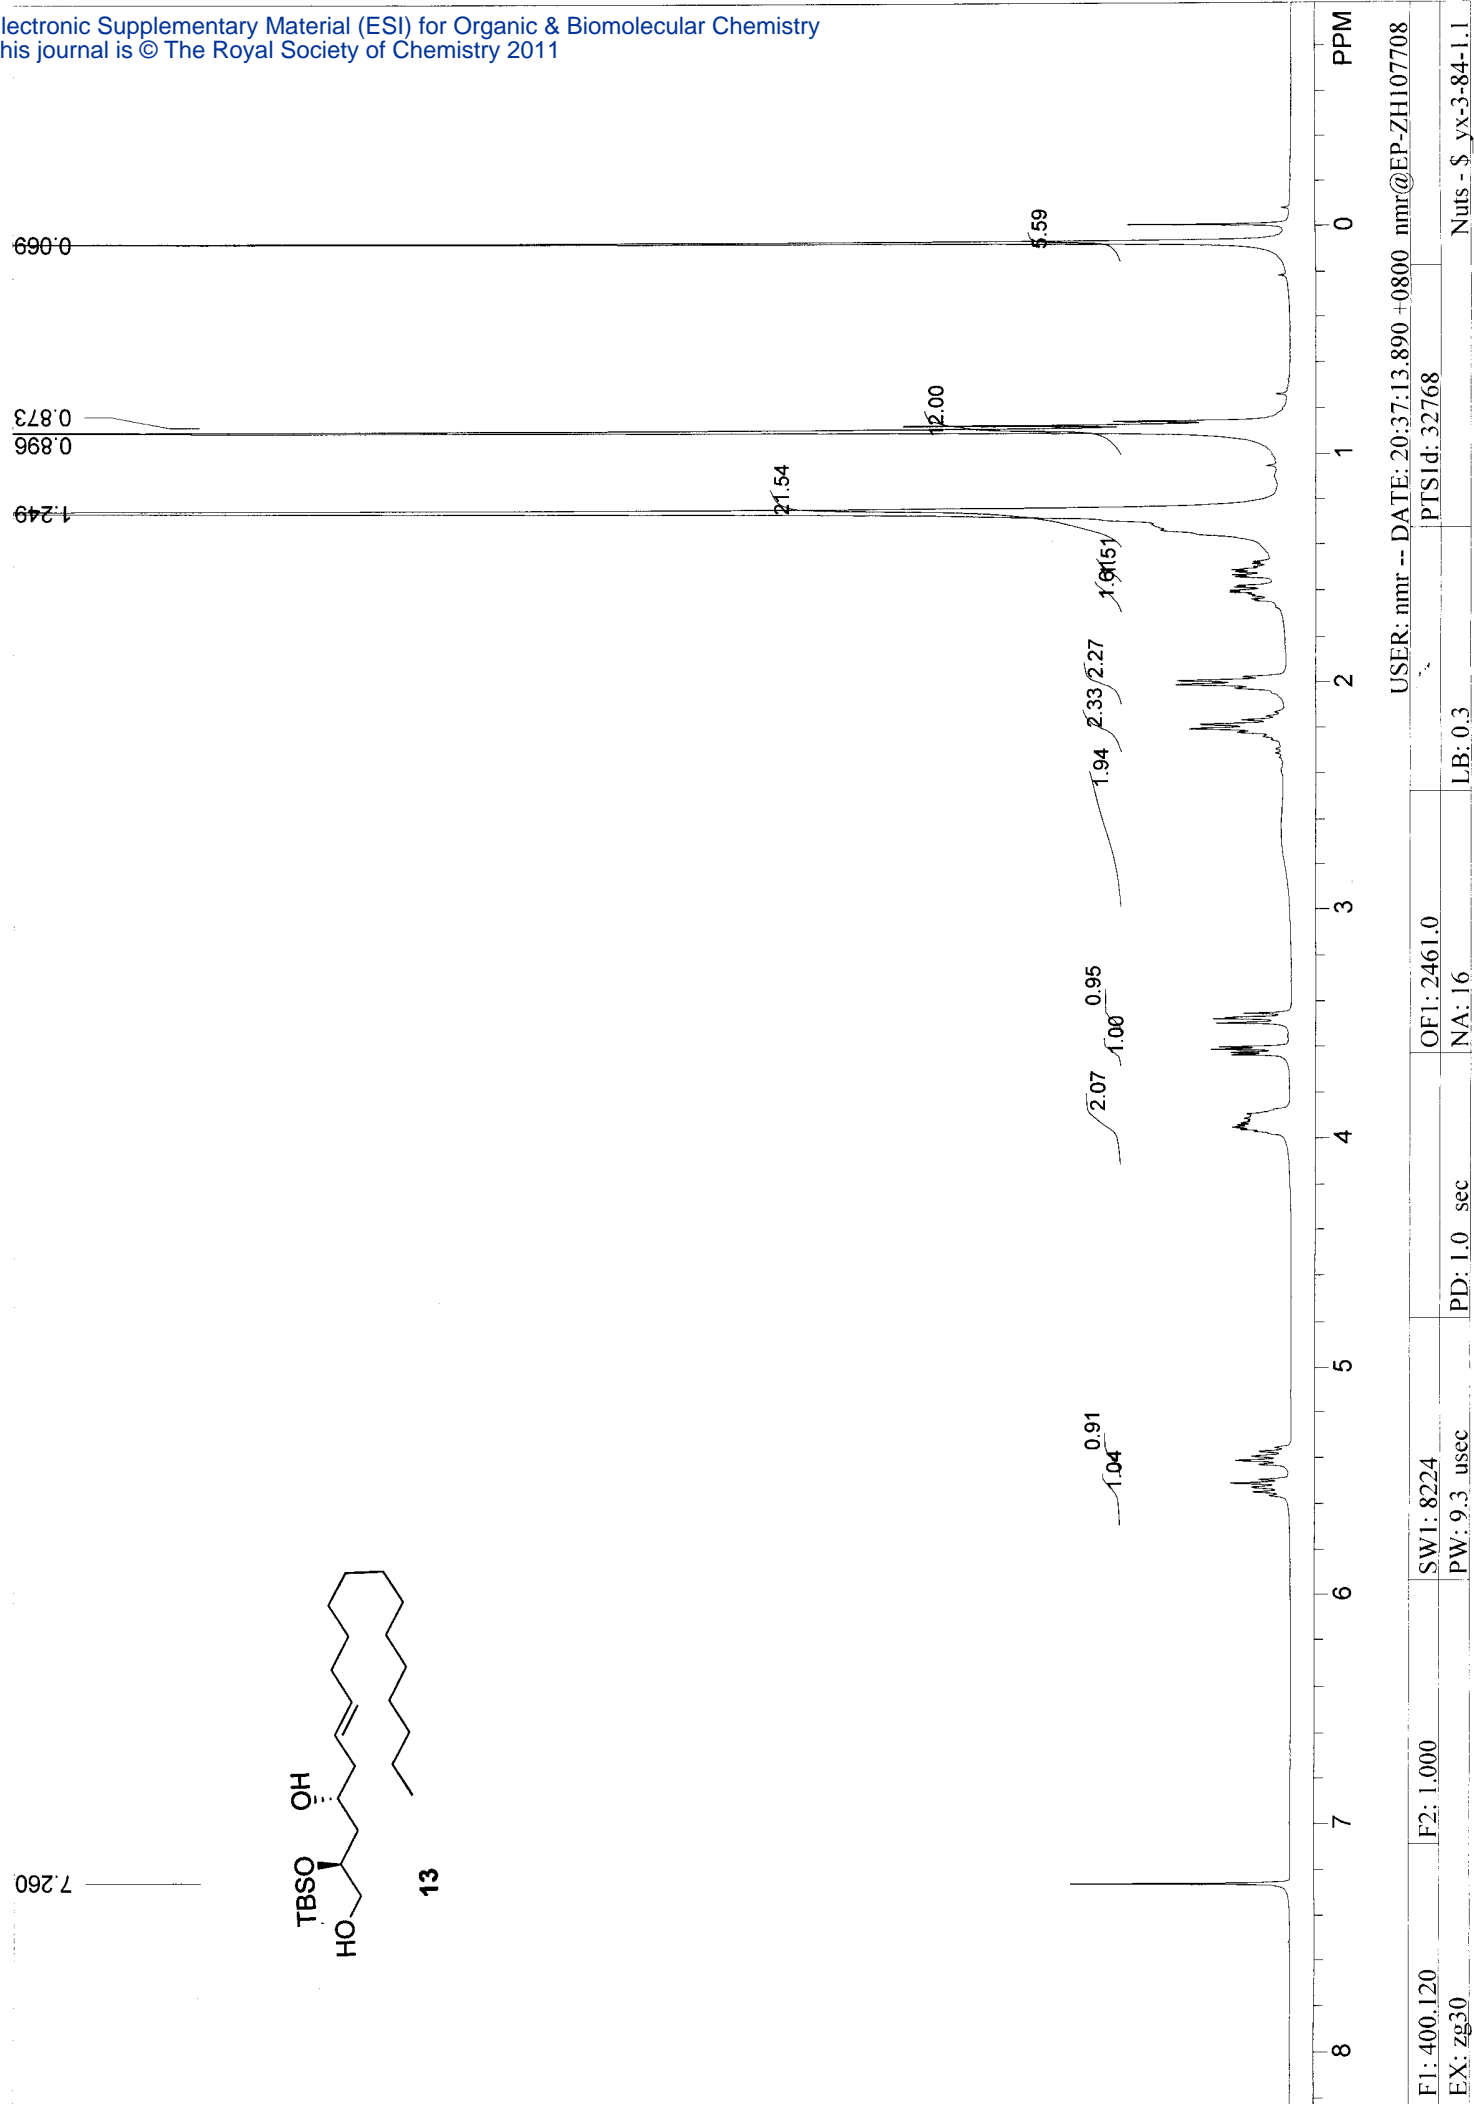

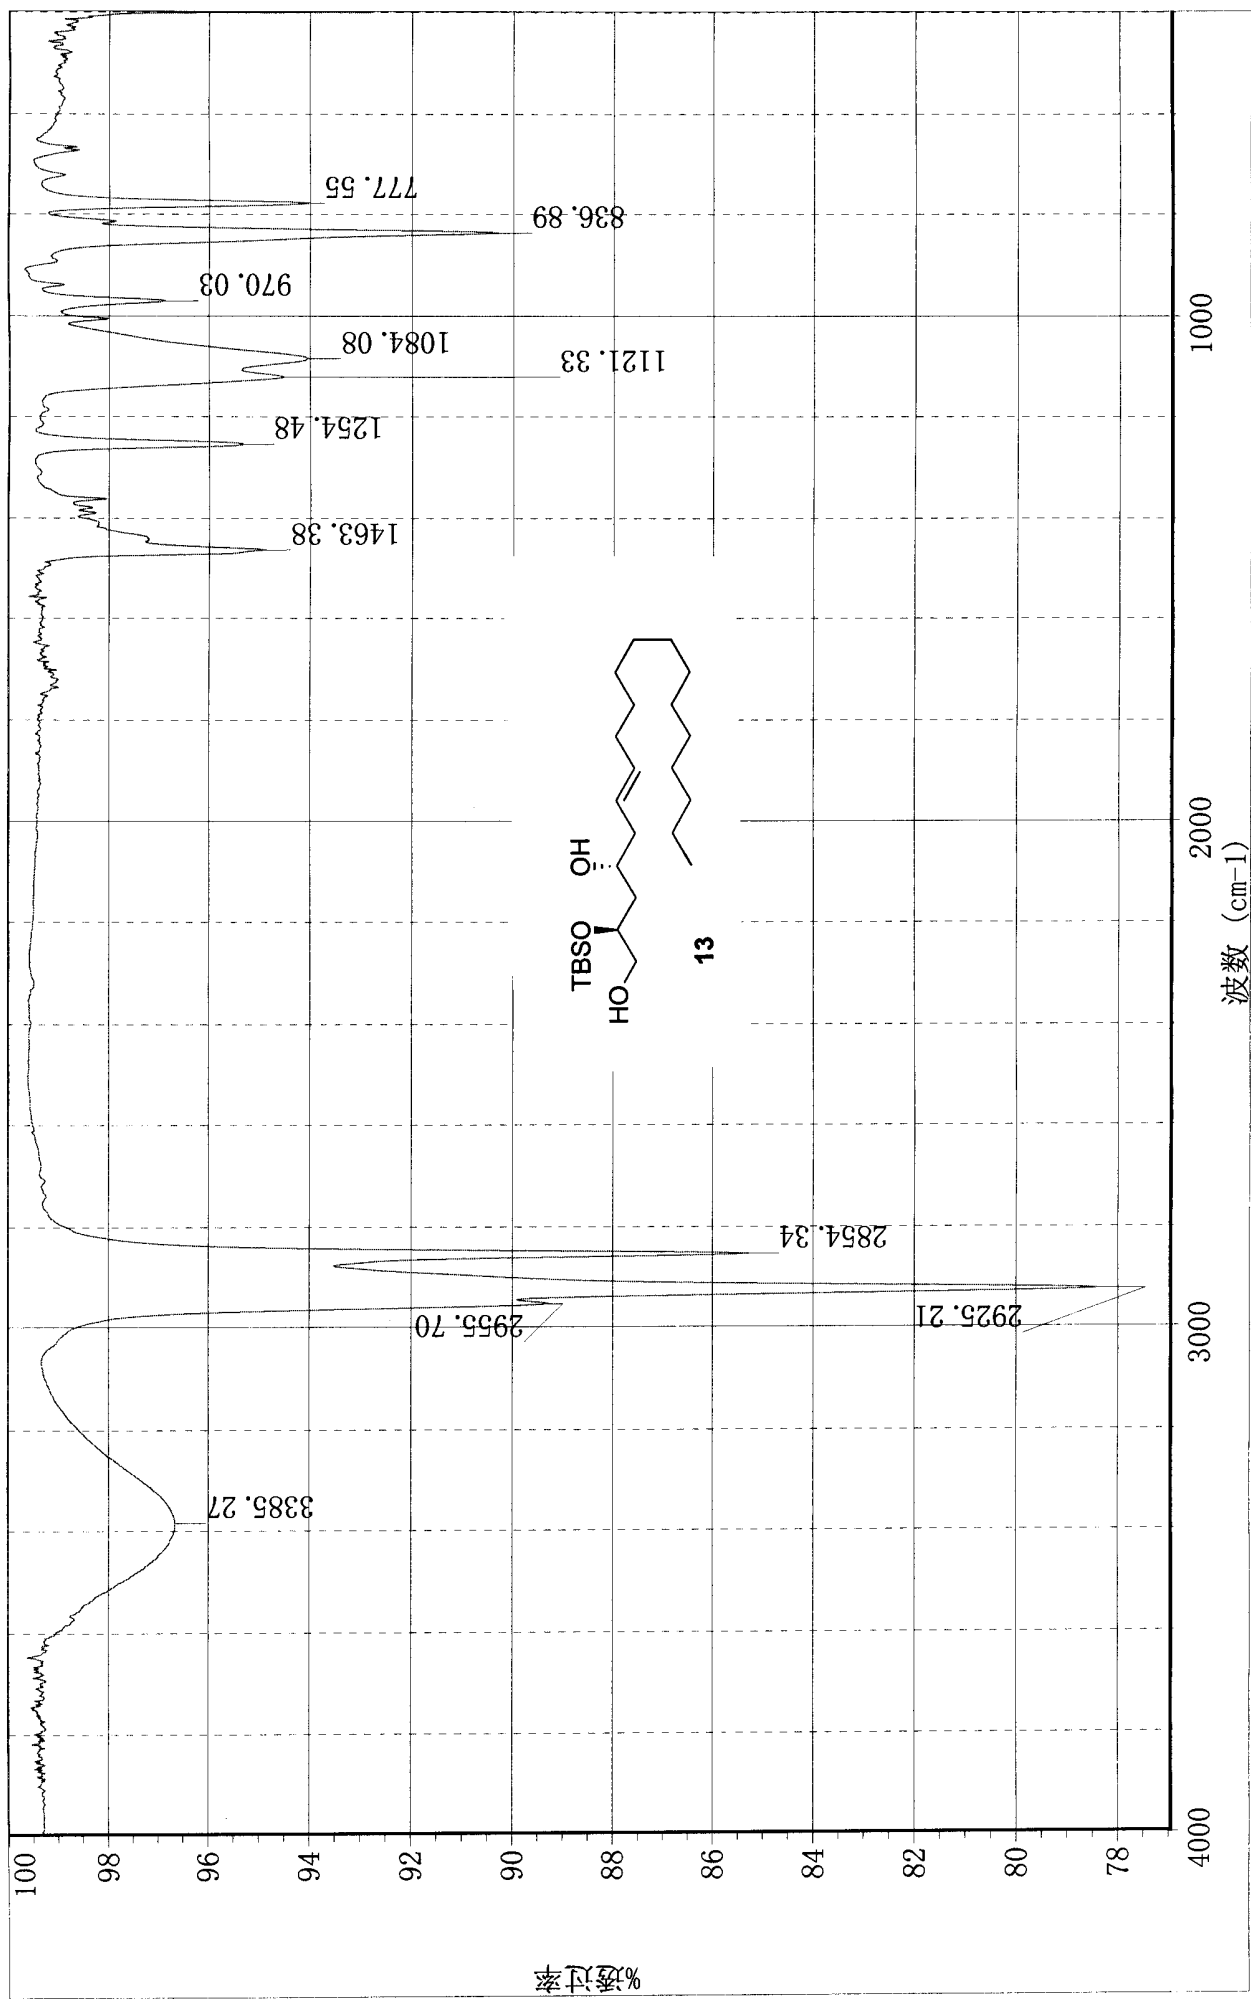

82 S

\*\*yx-3-84-1

采集时间: 星期四 4月 07 21:27:29 2011 (GMT+08:00)

上海有机所生命有机化学国家重点实验室

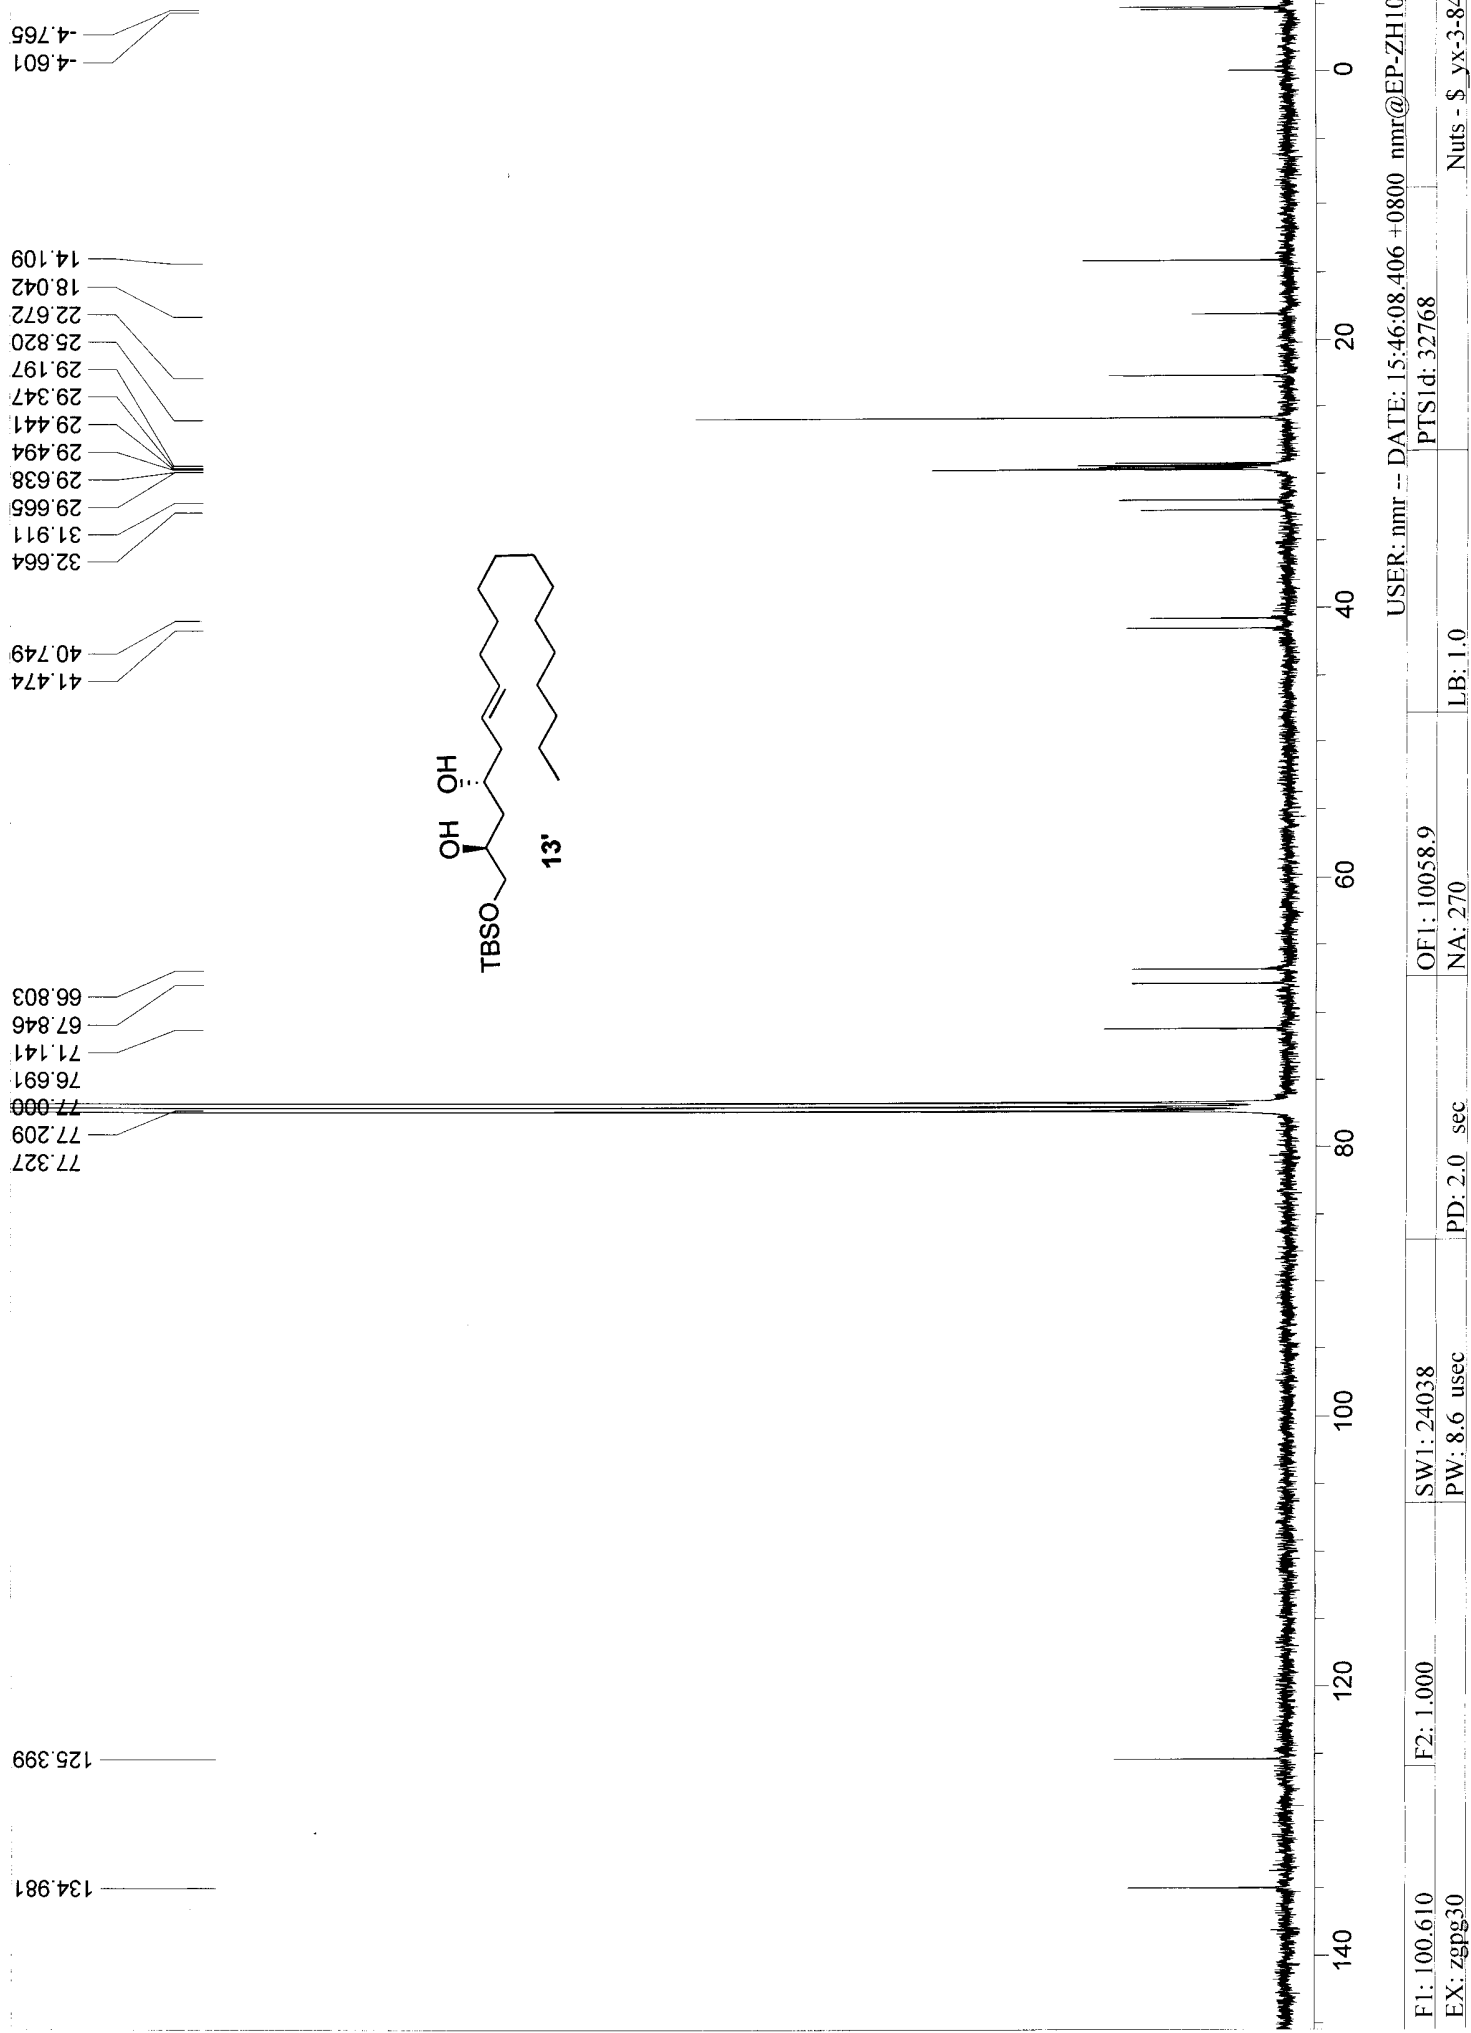

F1: 100.610 F2: 1.000 SW1: 24038 PD: 2.0 sec OF1: 10058.9  
 EX: zgpg30 PW: 8.6 usec NA: 270 L.B: 1.0  
 USER: nmr -- DATE: 15:46:08.406 +0800 nmr@EP-ZH107708  
 PTSId: 32768 Nuts - \$ \_yx-3-84-2c.1

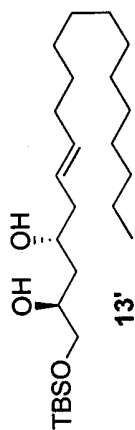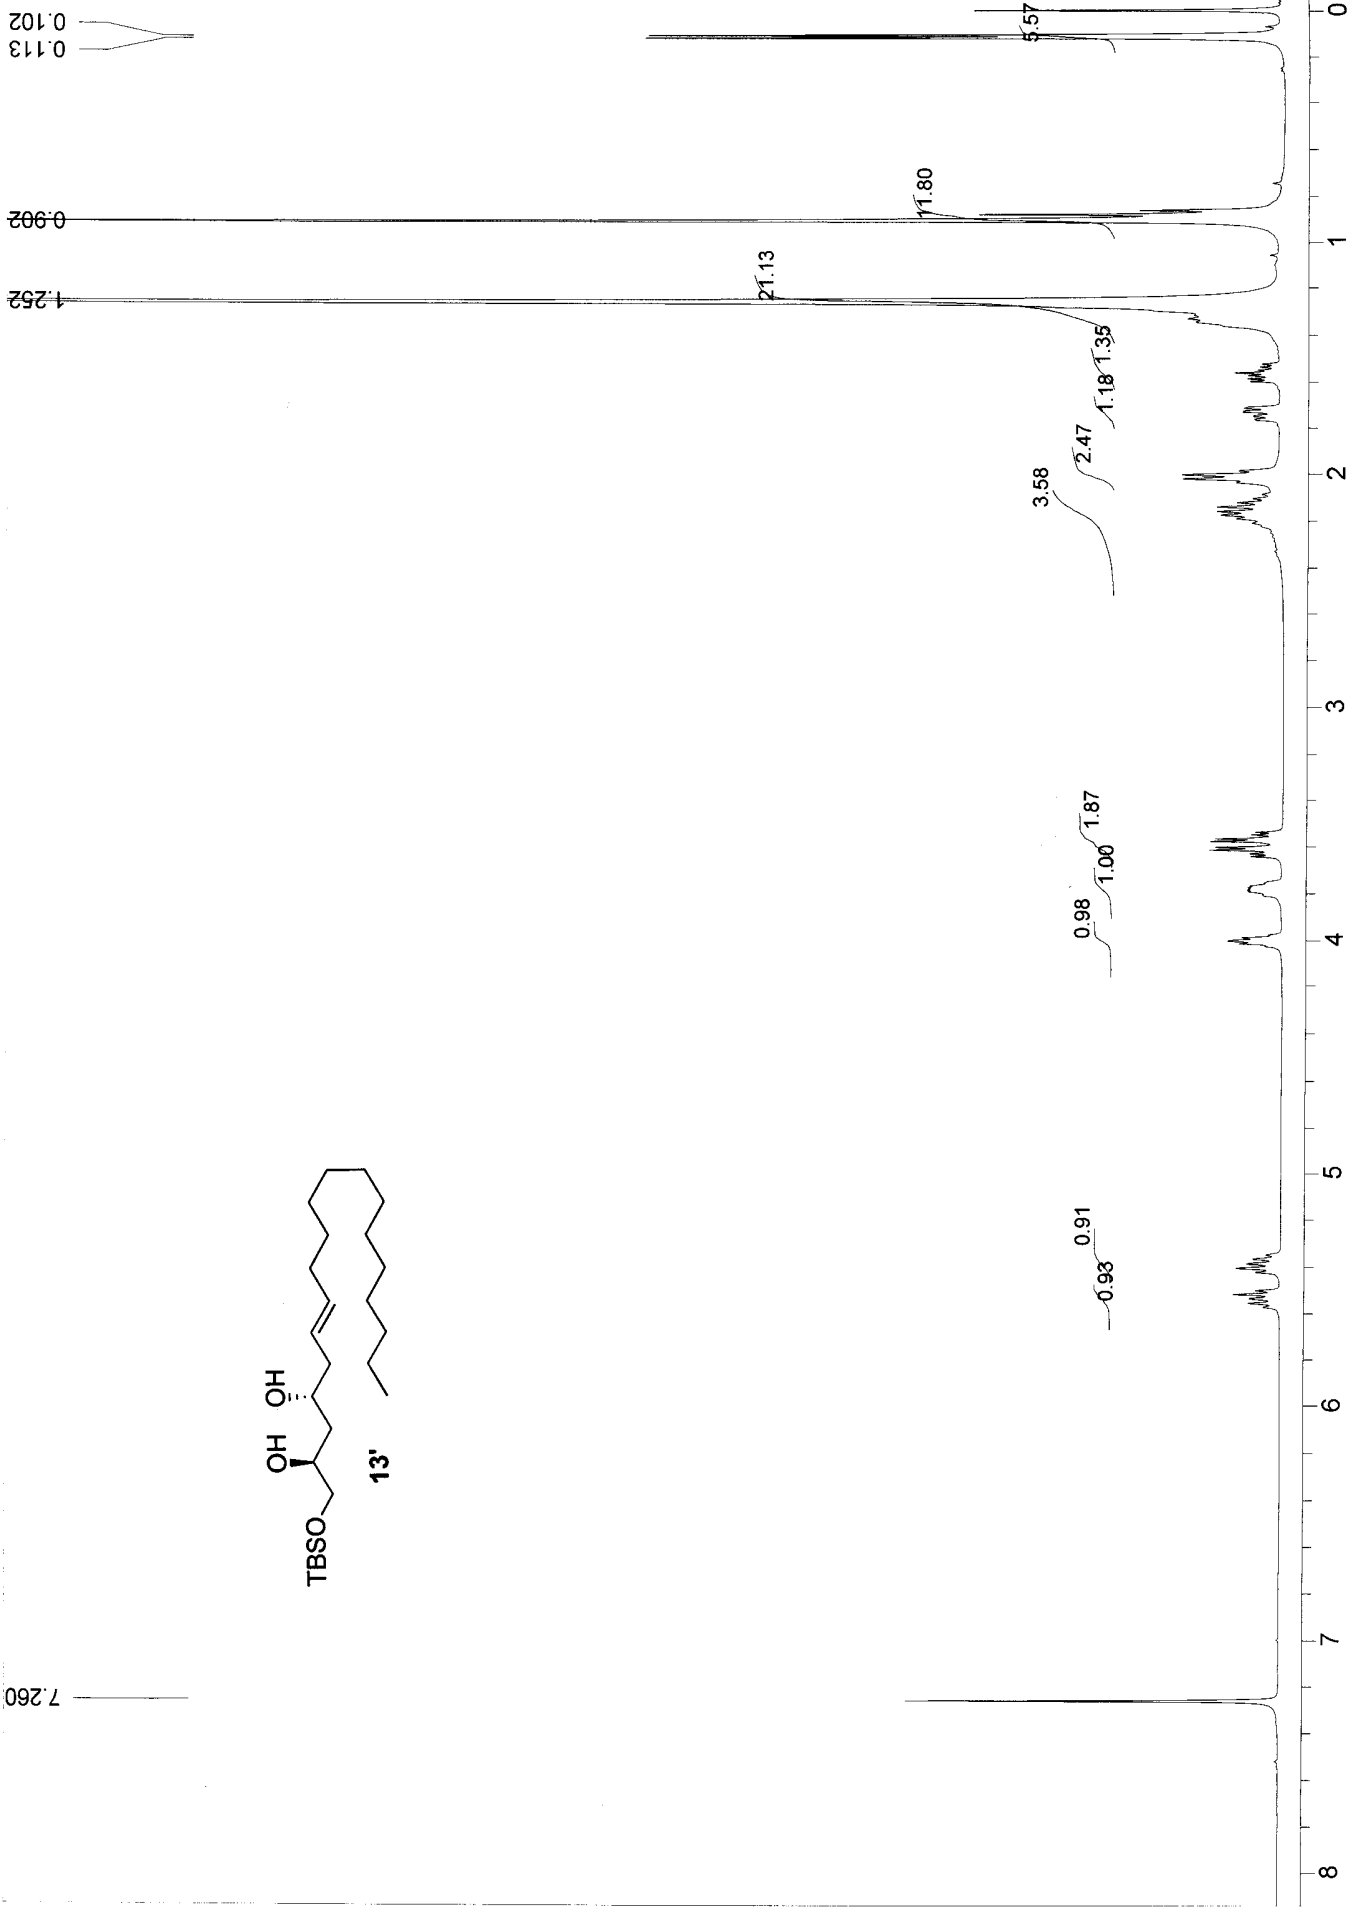

EX: zg30  
F1: 400.120  
F2: 1.000  
SW1: 8224  
PW: 9.3 usec  
PD: 1.0 sec  
OF1: 2461.1  
NA: 16  
LB: 0.3  
PTSD: 32768  
USER: nmr -- DATE: 20:30:38.859 +0800 nmr@EP-ZH107708  
Nuts - \$ \_yx-3-84-2.1

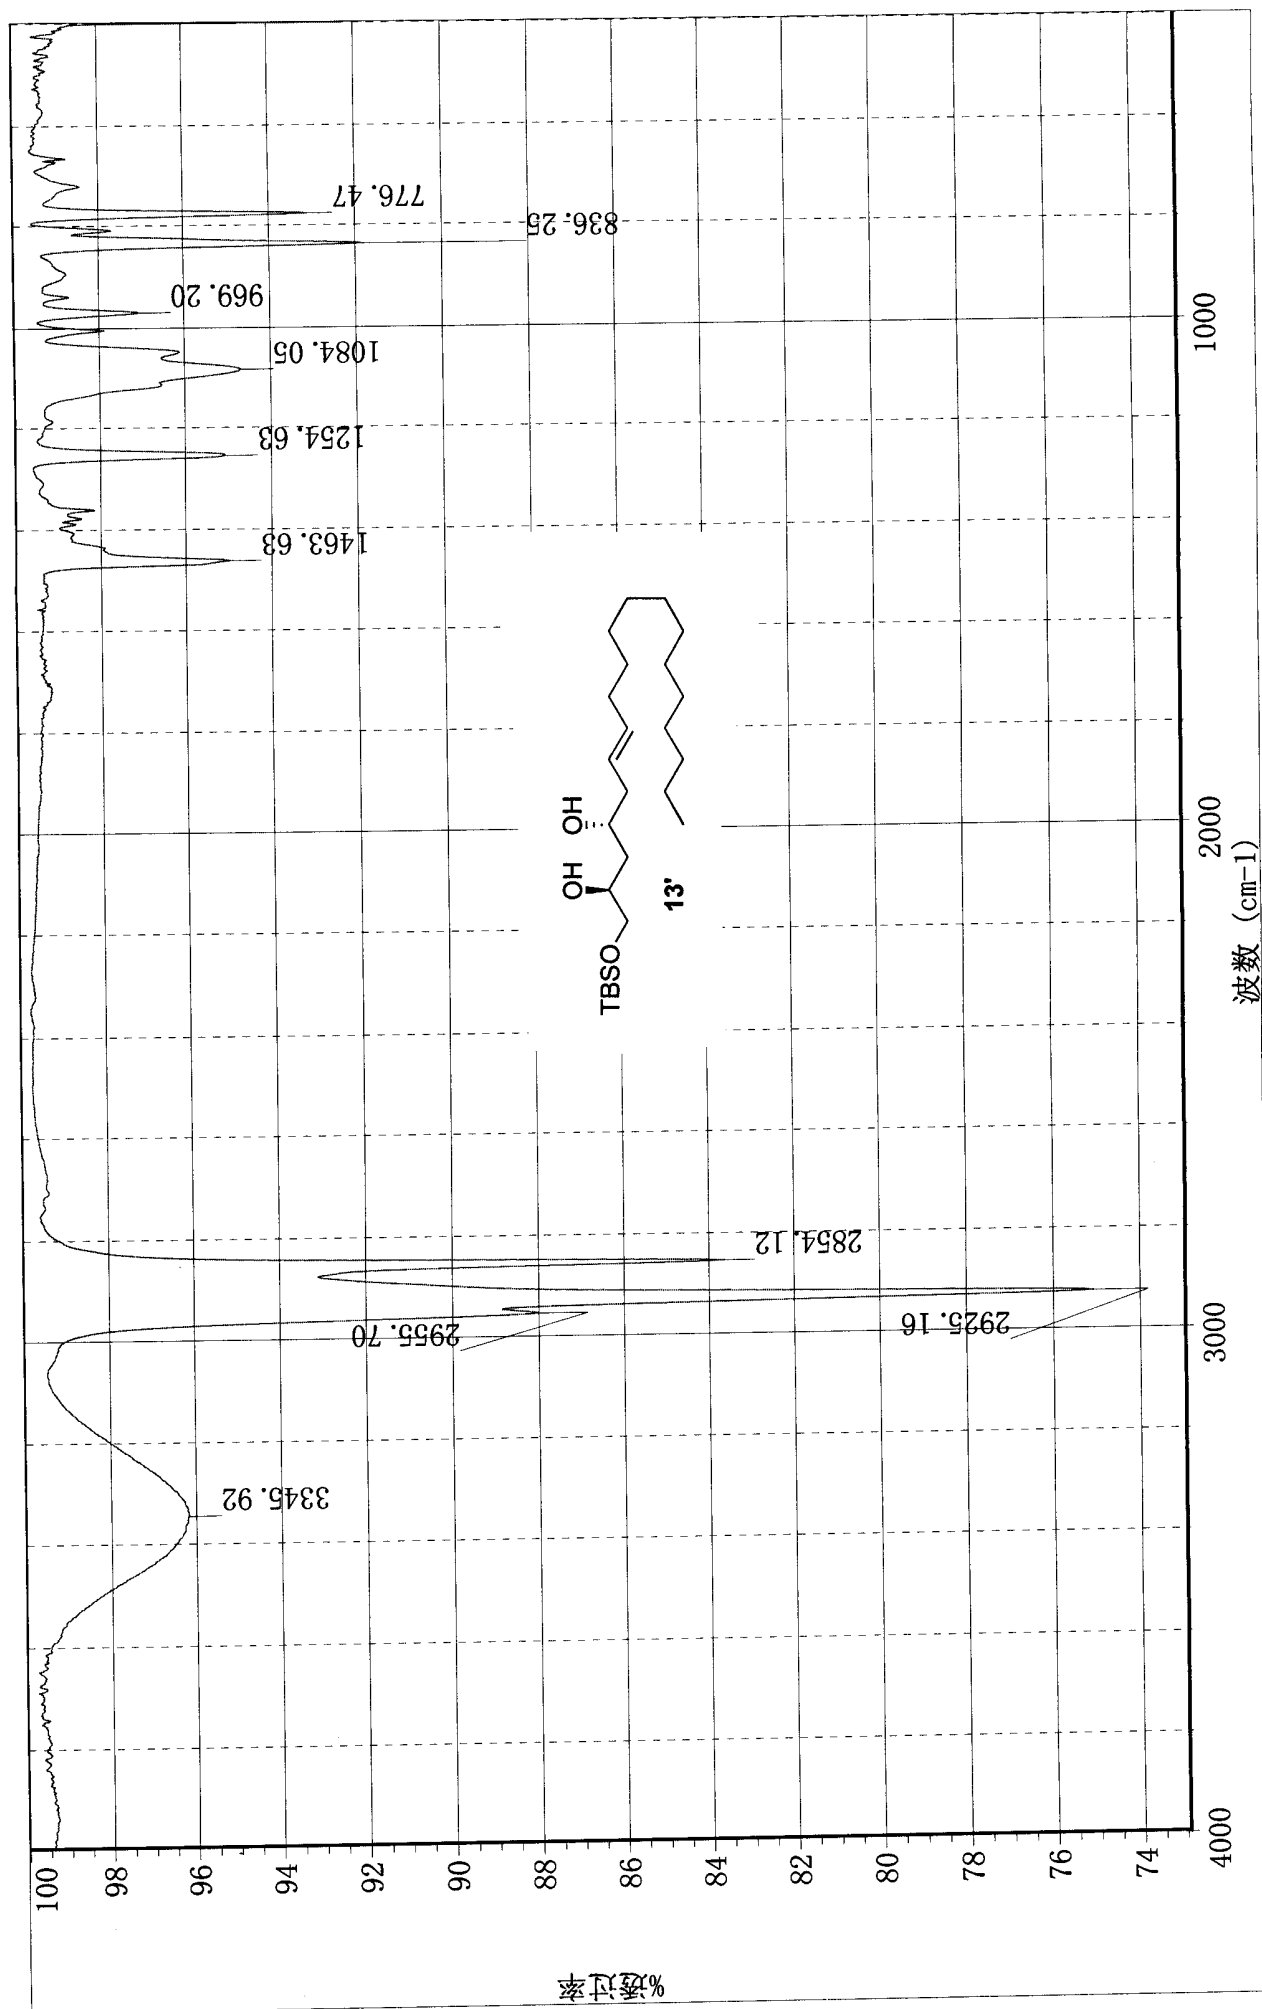

13 S

\*\*yx-3-84-2

采集时间: 星期四 4月 07 21:35:09 2011 (GMT+08:00)

上海有机所生命有机化学国家重点实验室

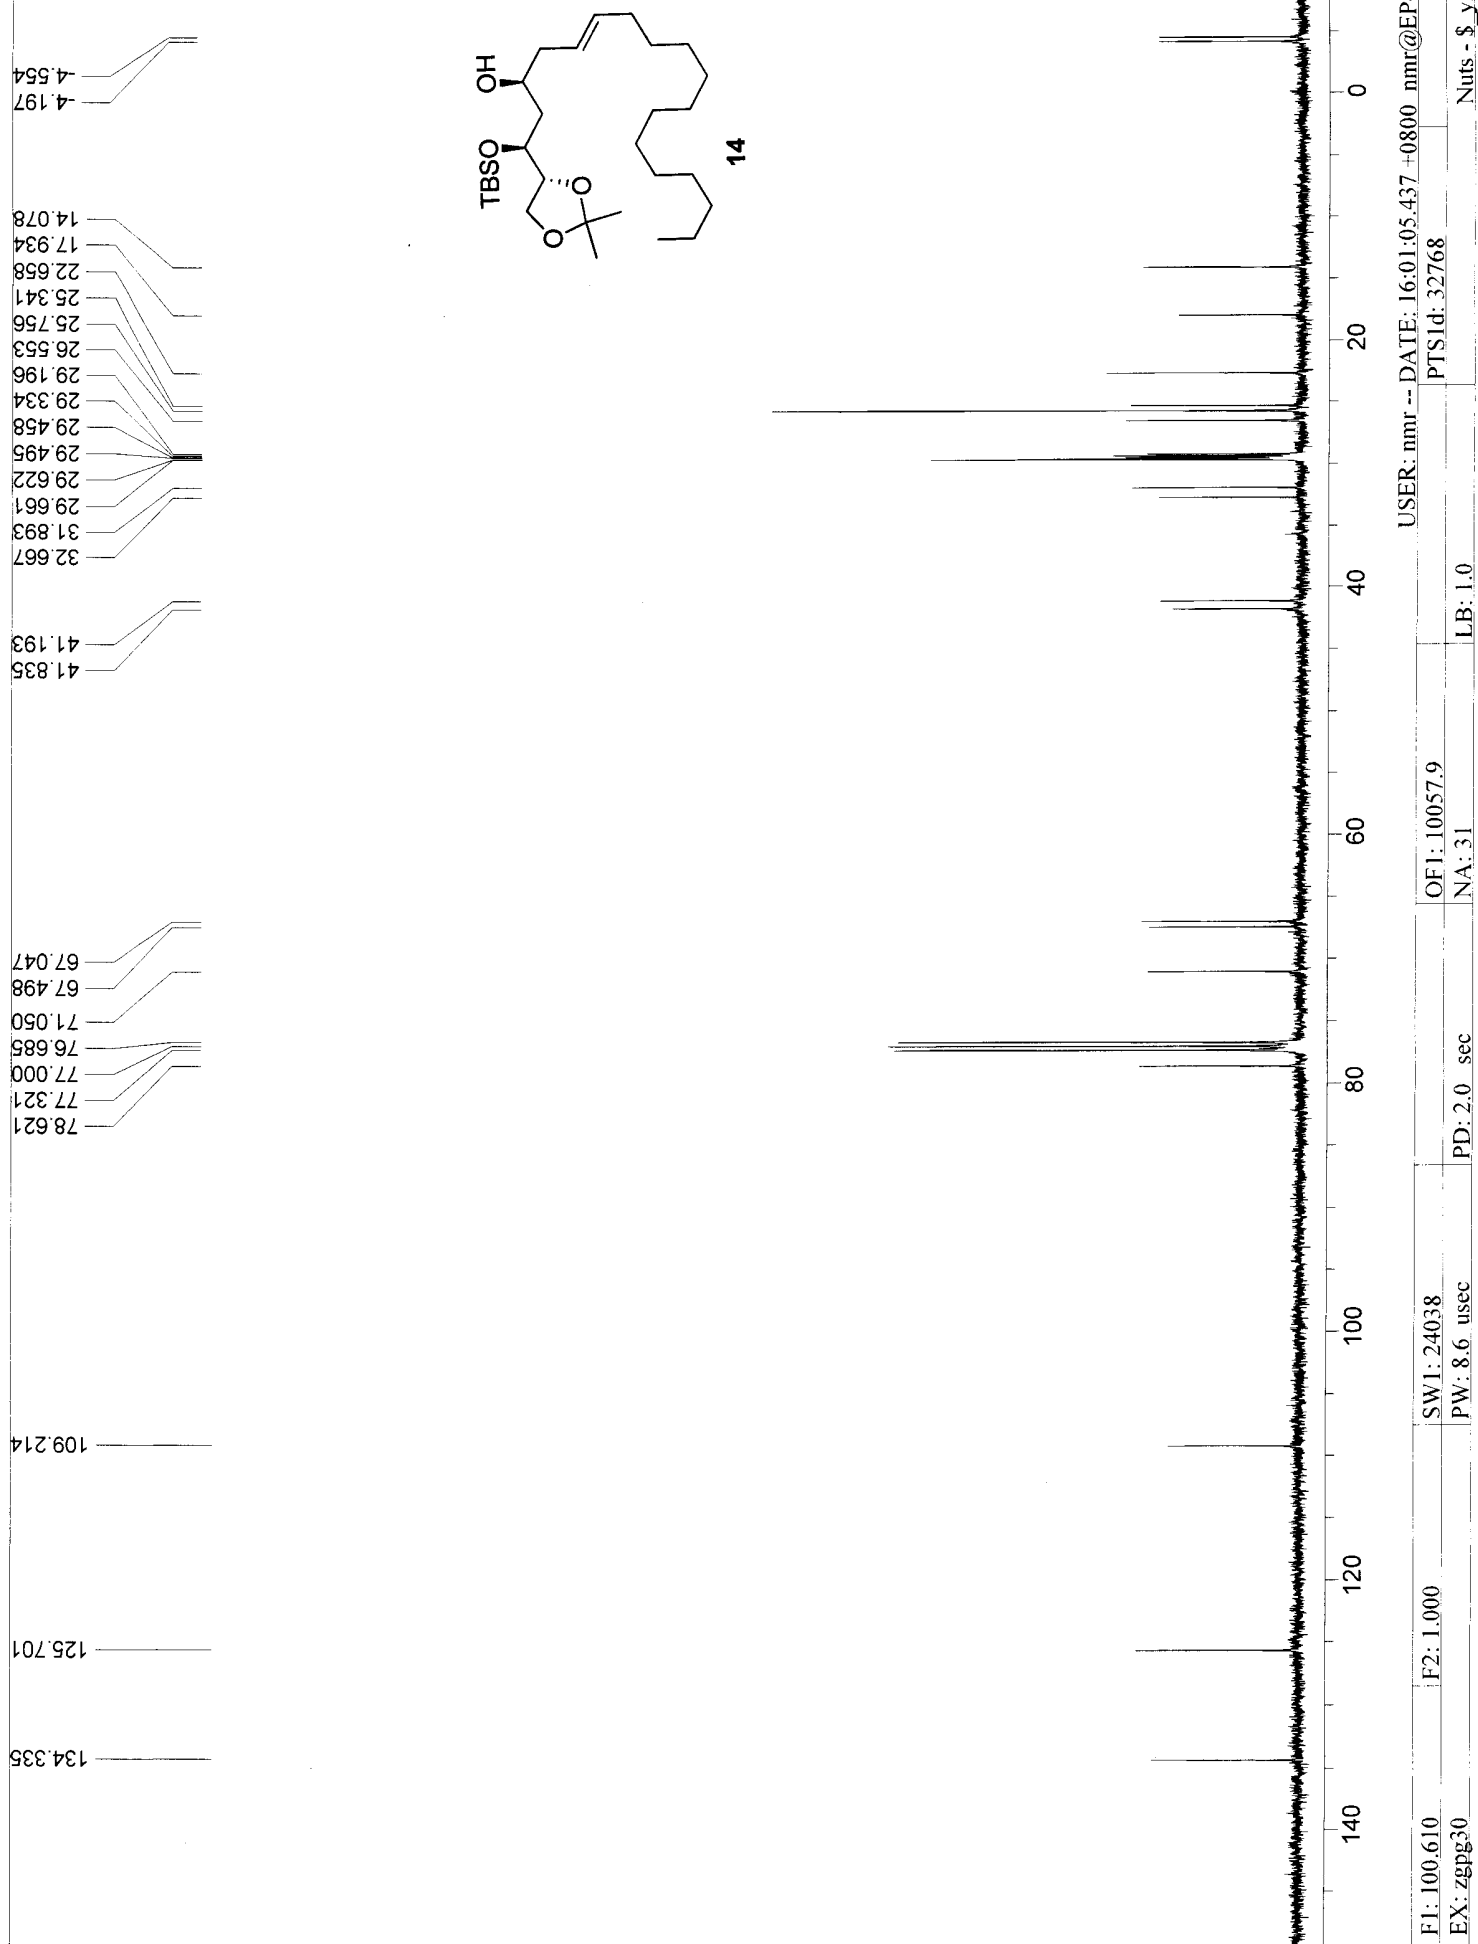



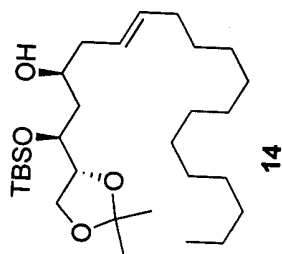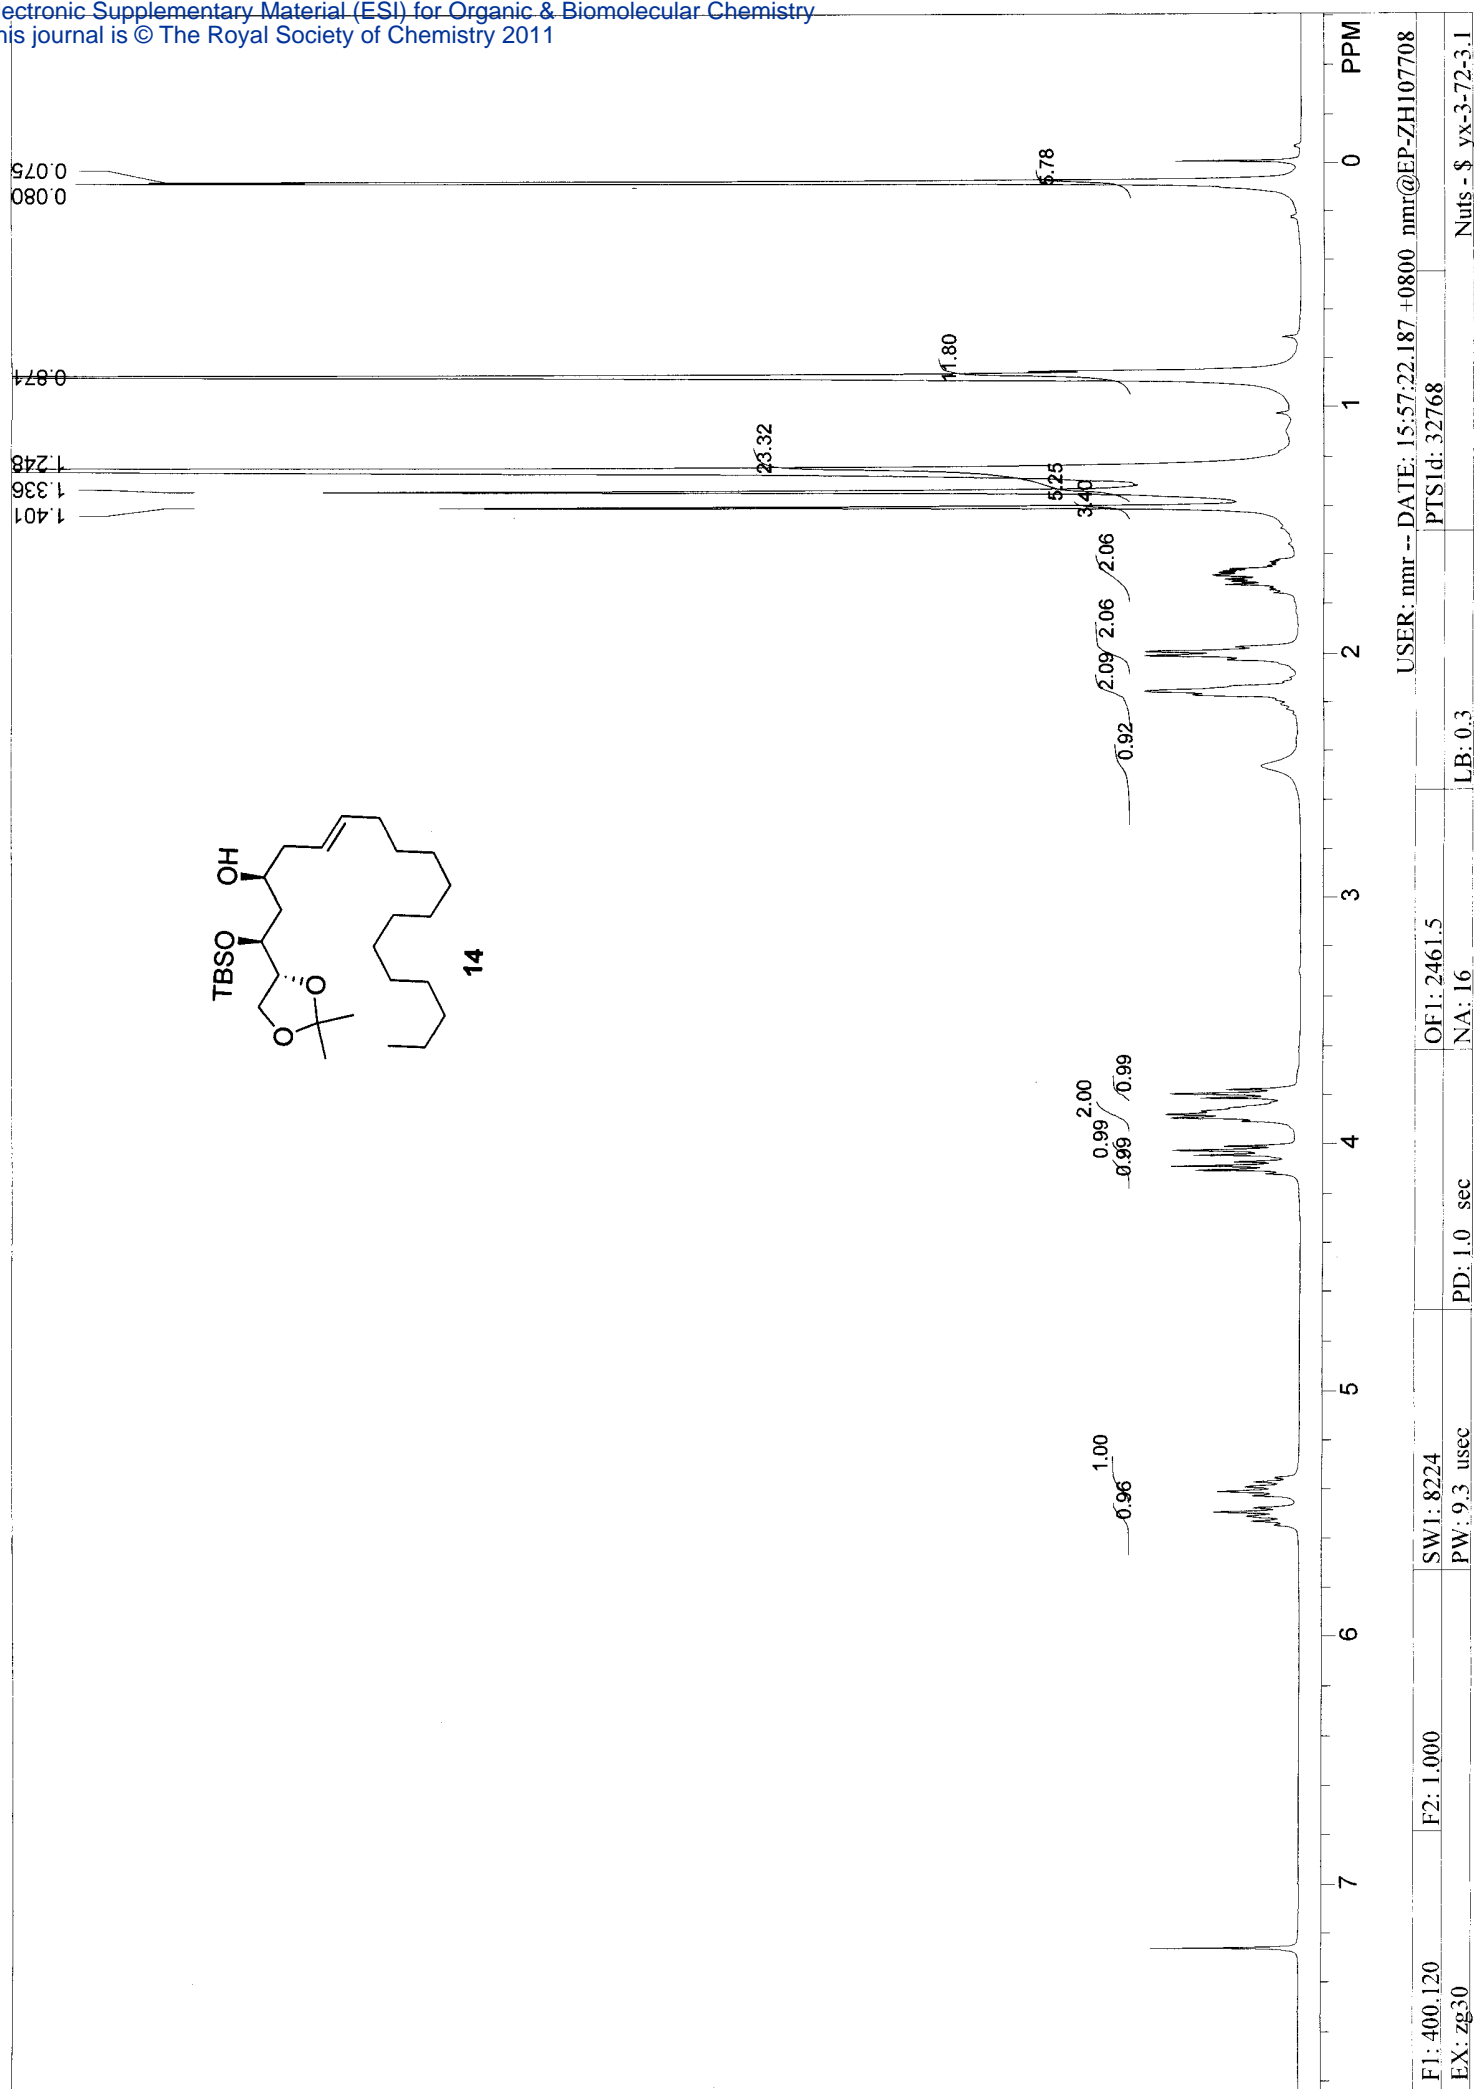

USER: mmr -- DATE: 15:57:22.187 +0800 .nmr@EP-ZHI07708  
 PTSId: 32768

OF1: 2461.5  
 NA: 16  
 LB: 0.3

PD: 1.0 sec

SW1: 8224  
 PW: 9.3 usec

F1: 400.120  
 F2: 1.000

EX: zg30

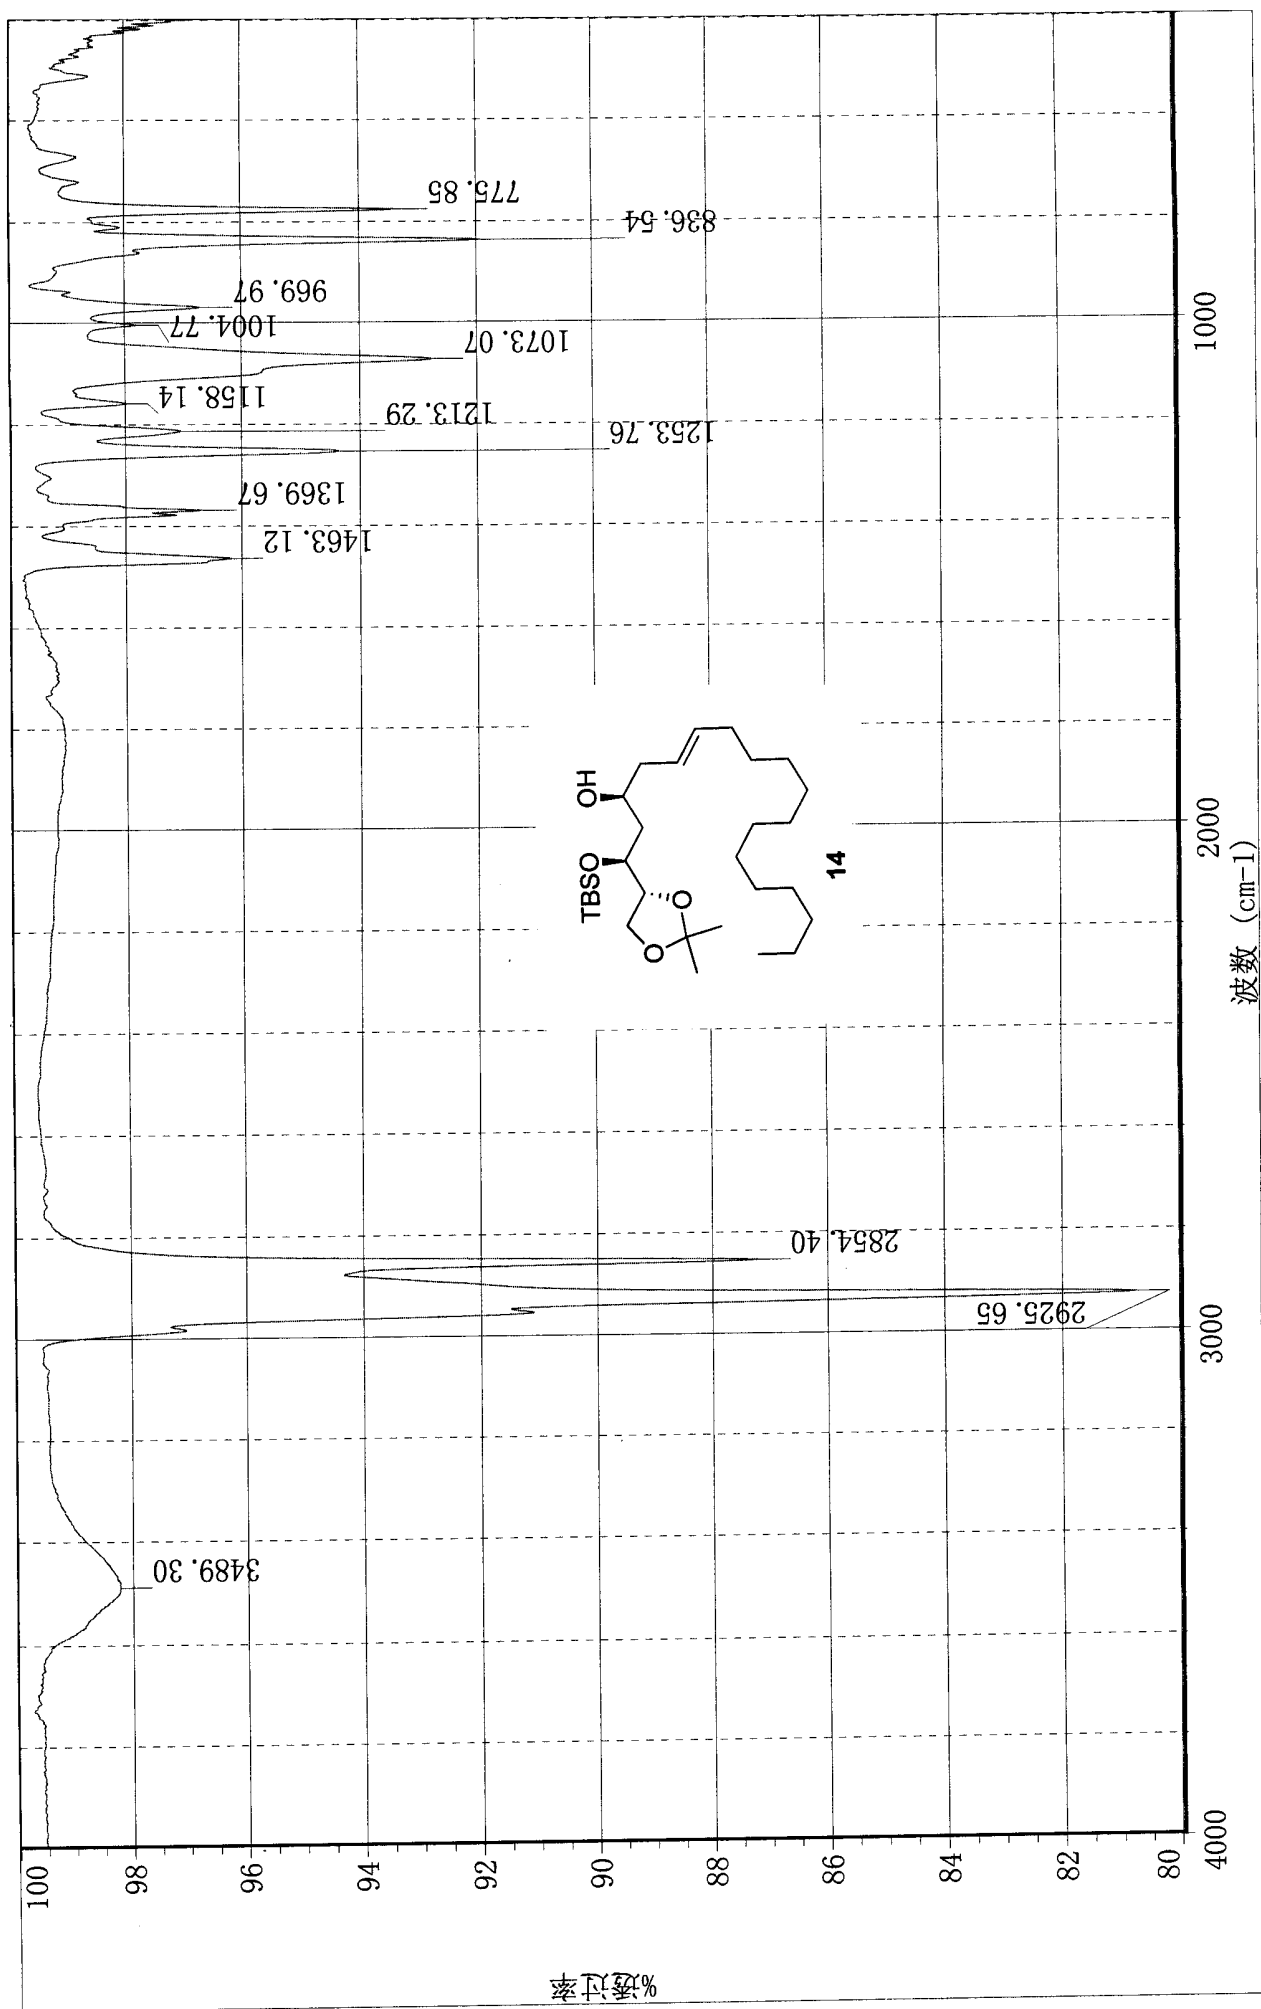

\*星期一 3月 28 20:18:29 2011 X-3-12-3  
采集时间: 星期一 3月 28 20:19:10 2011 (GMT+08:00)

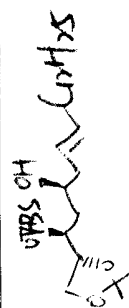

上海有机所生命有机化学国家重点实验室

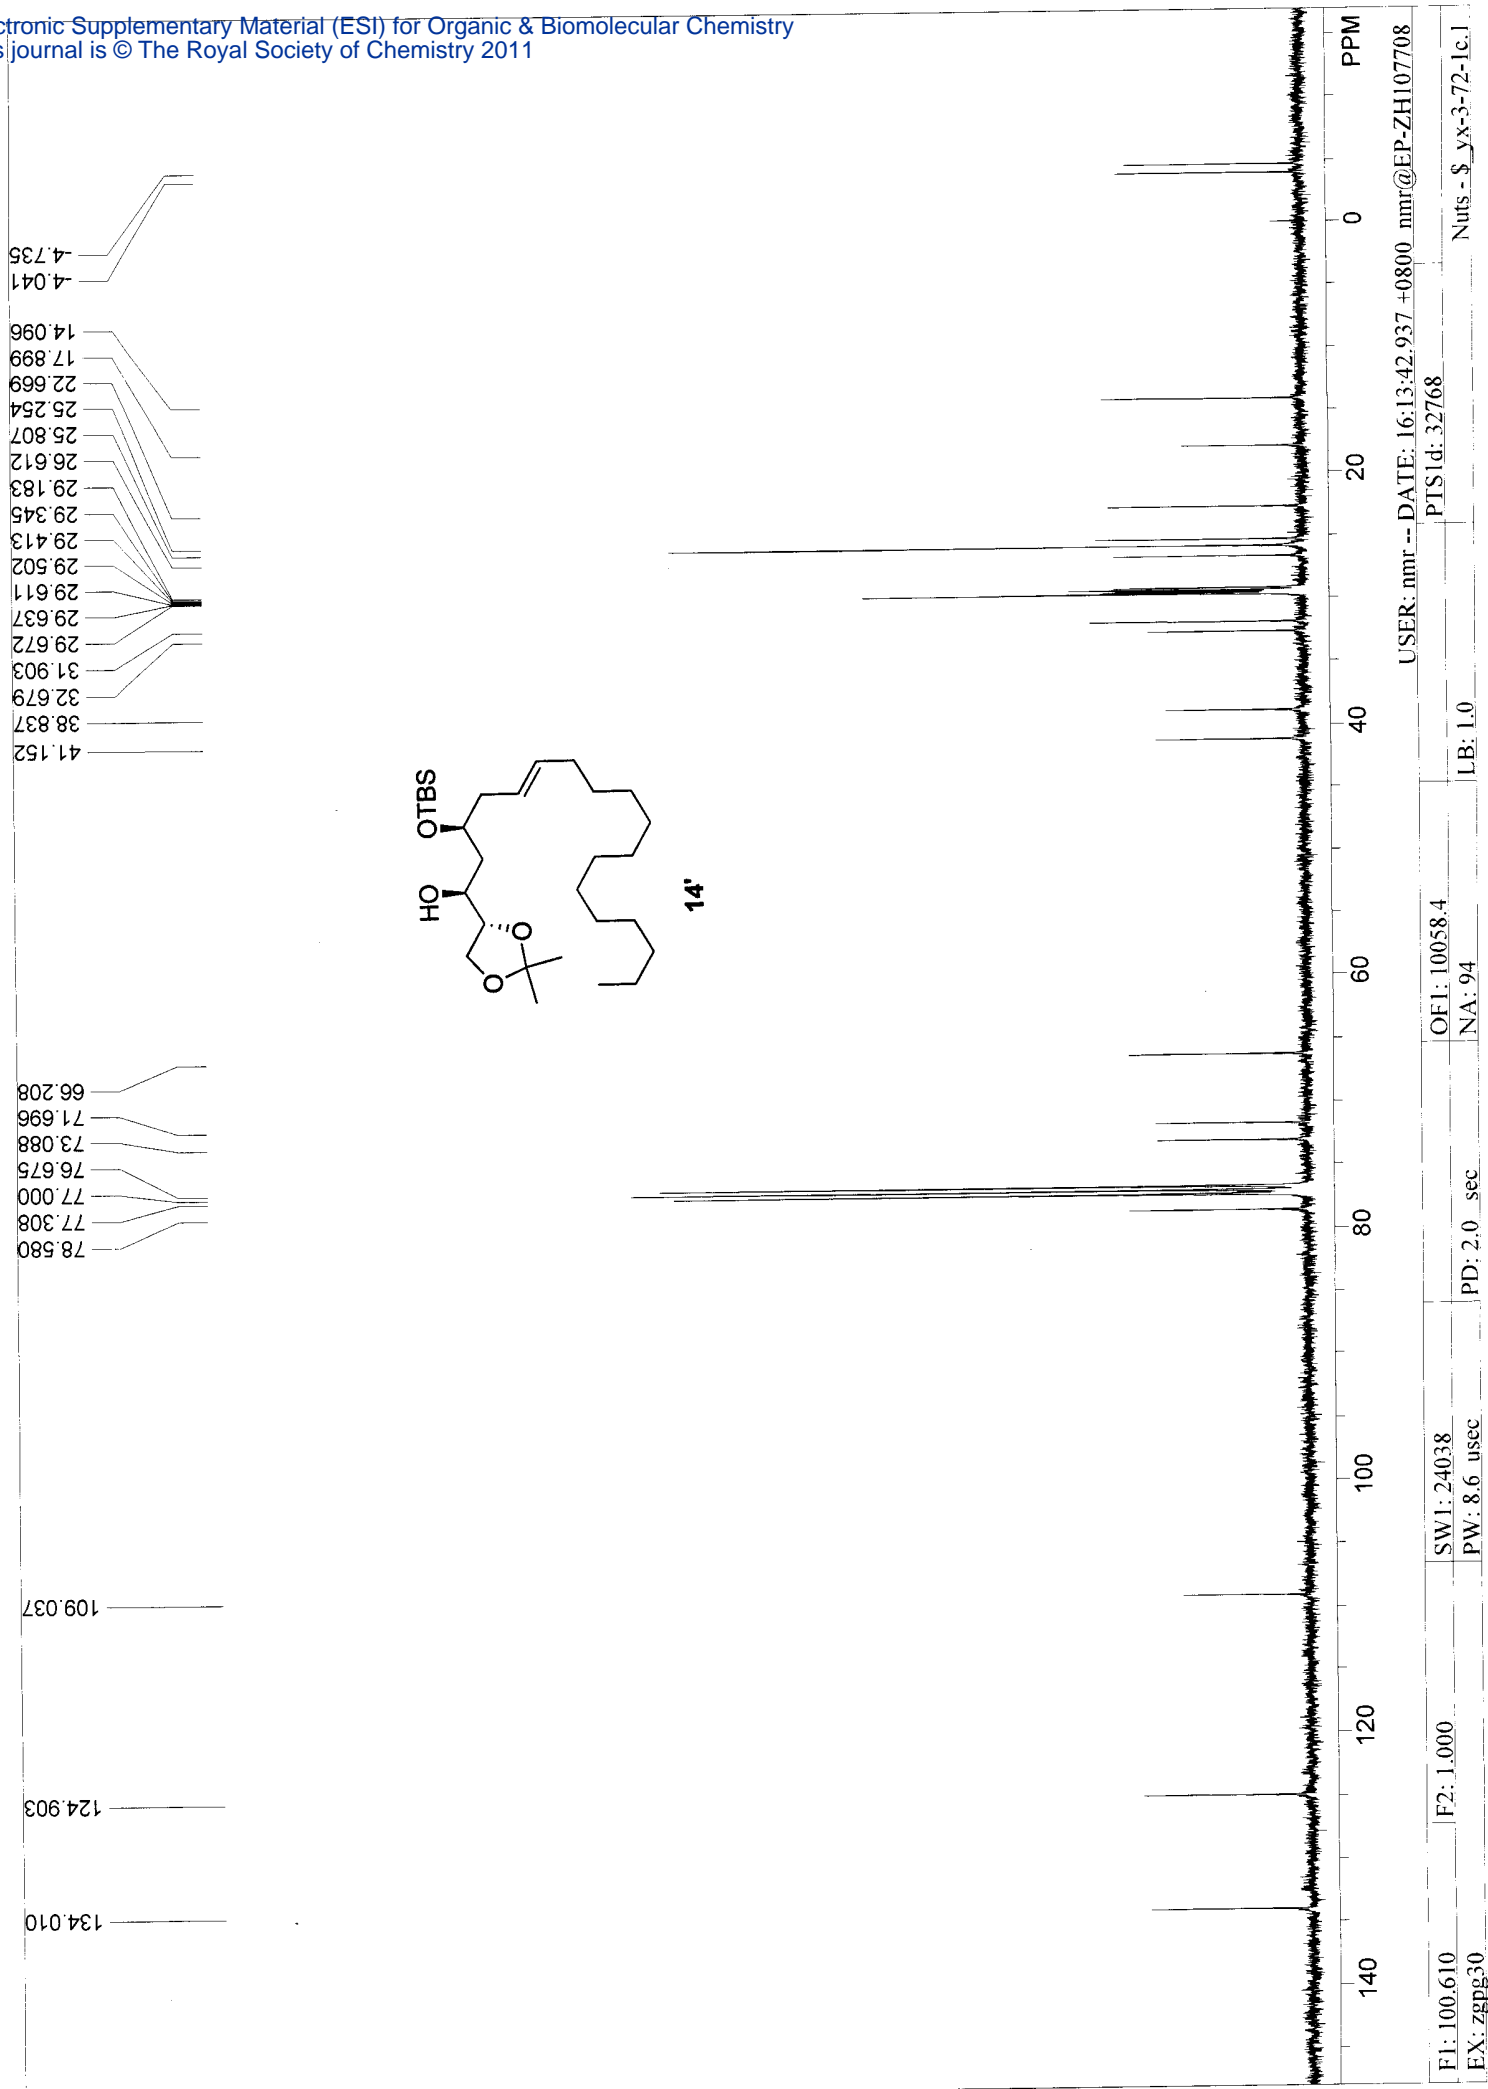

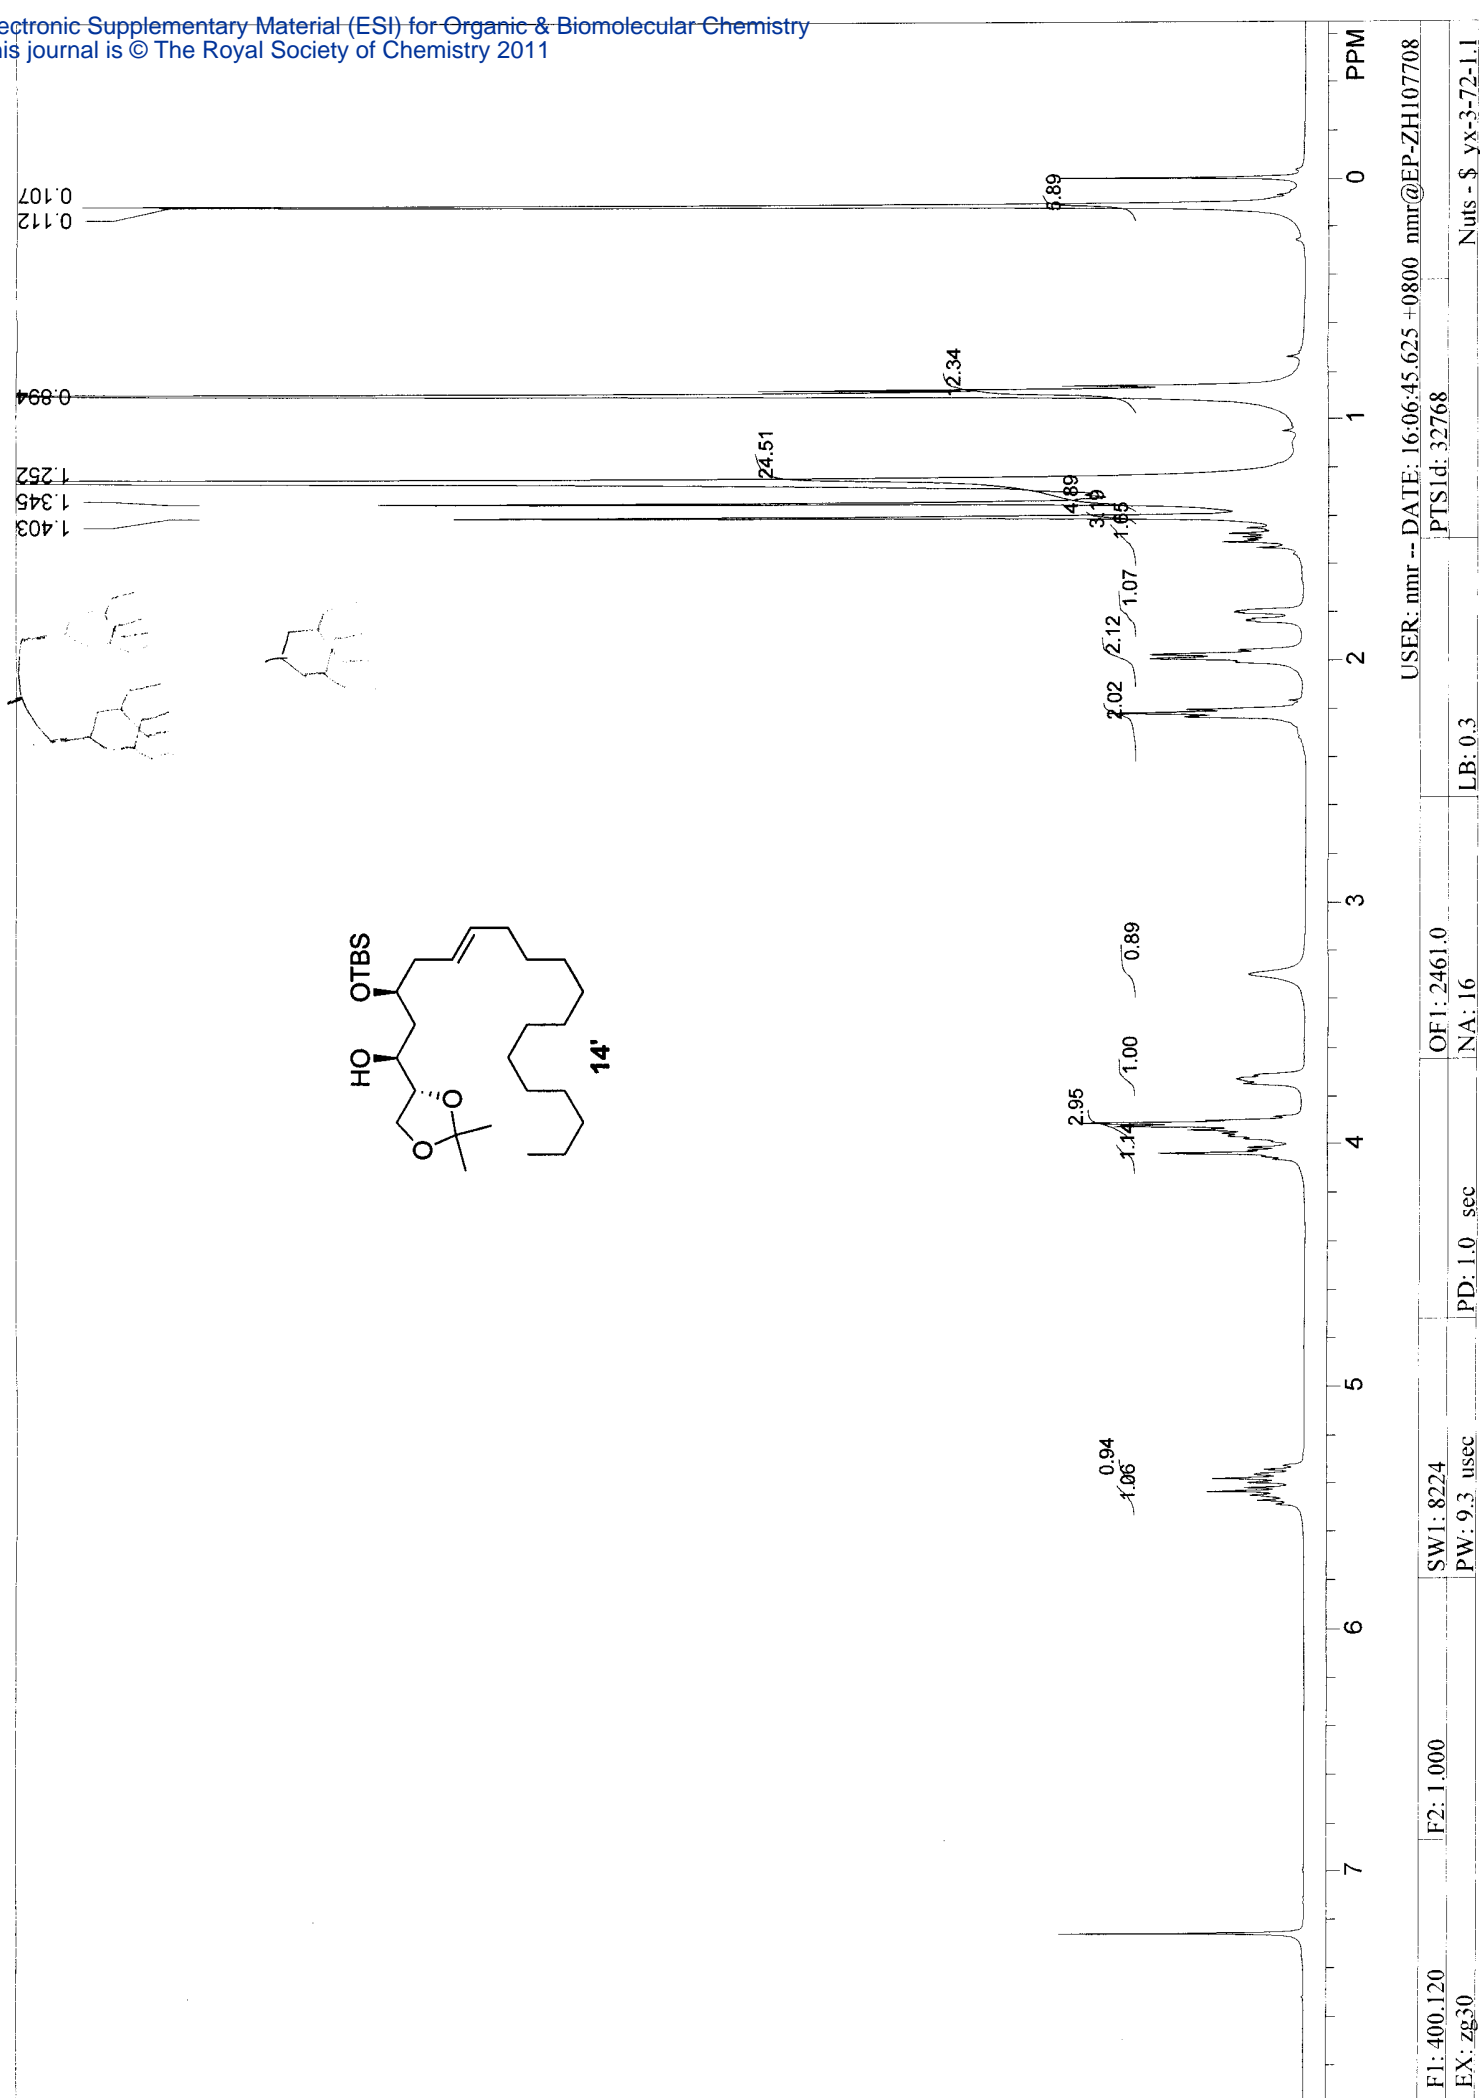

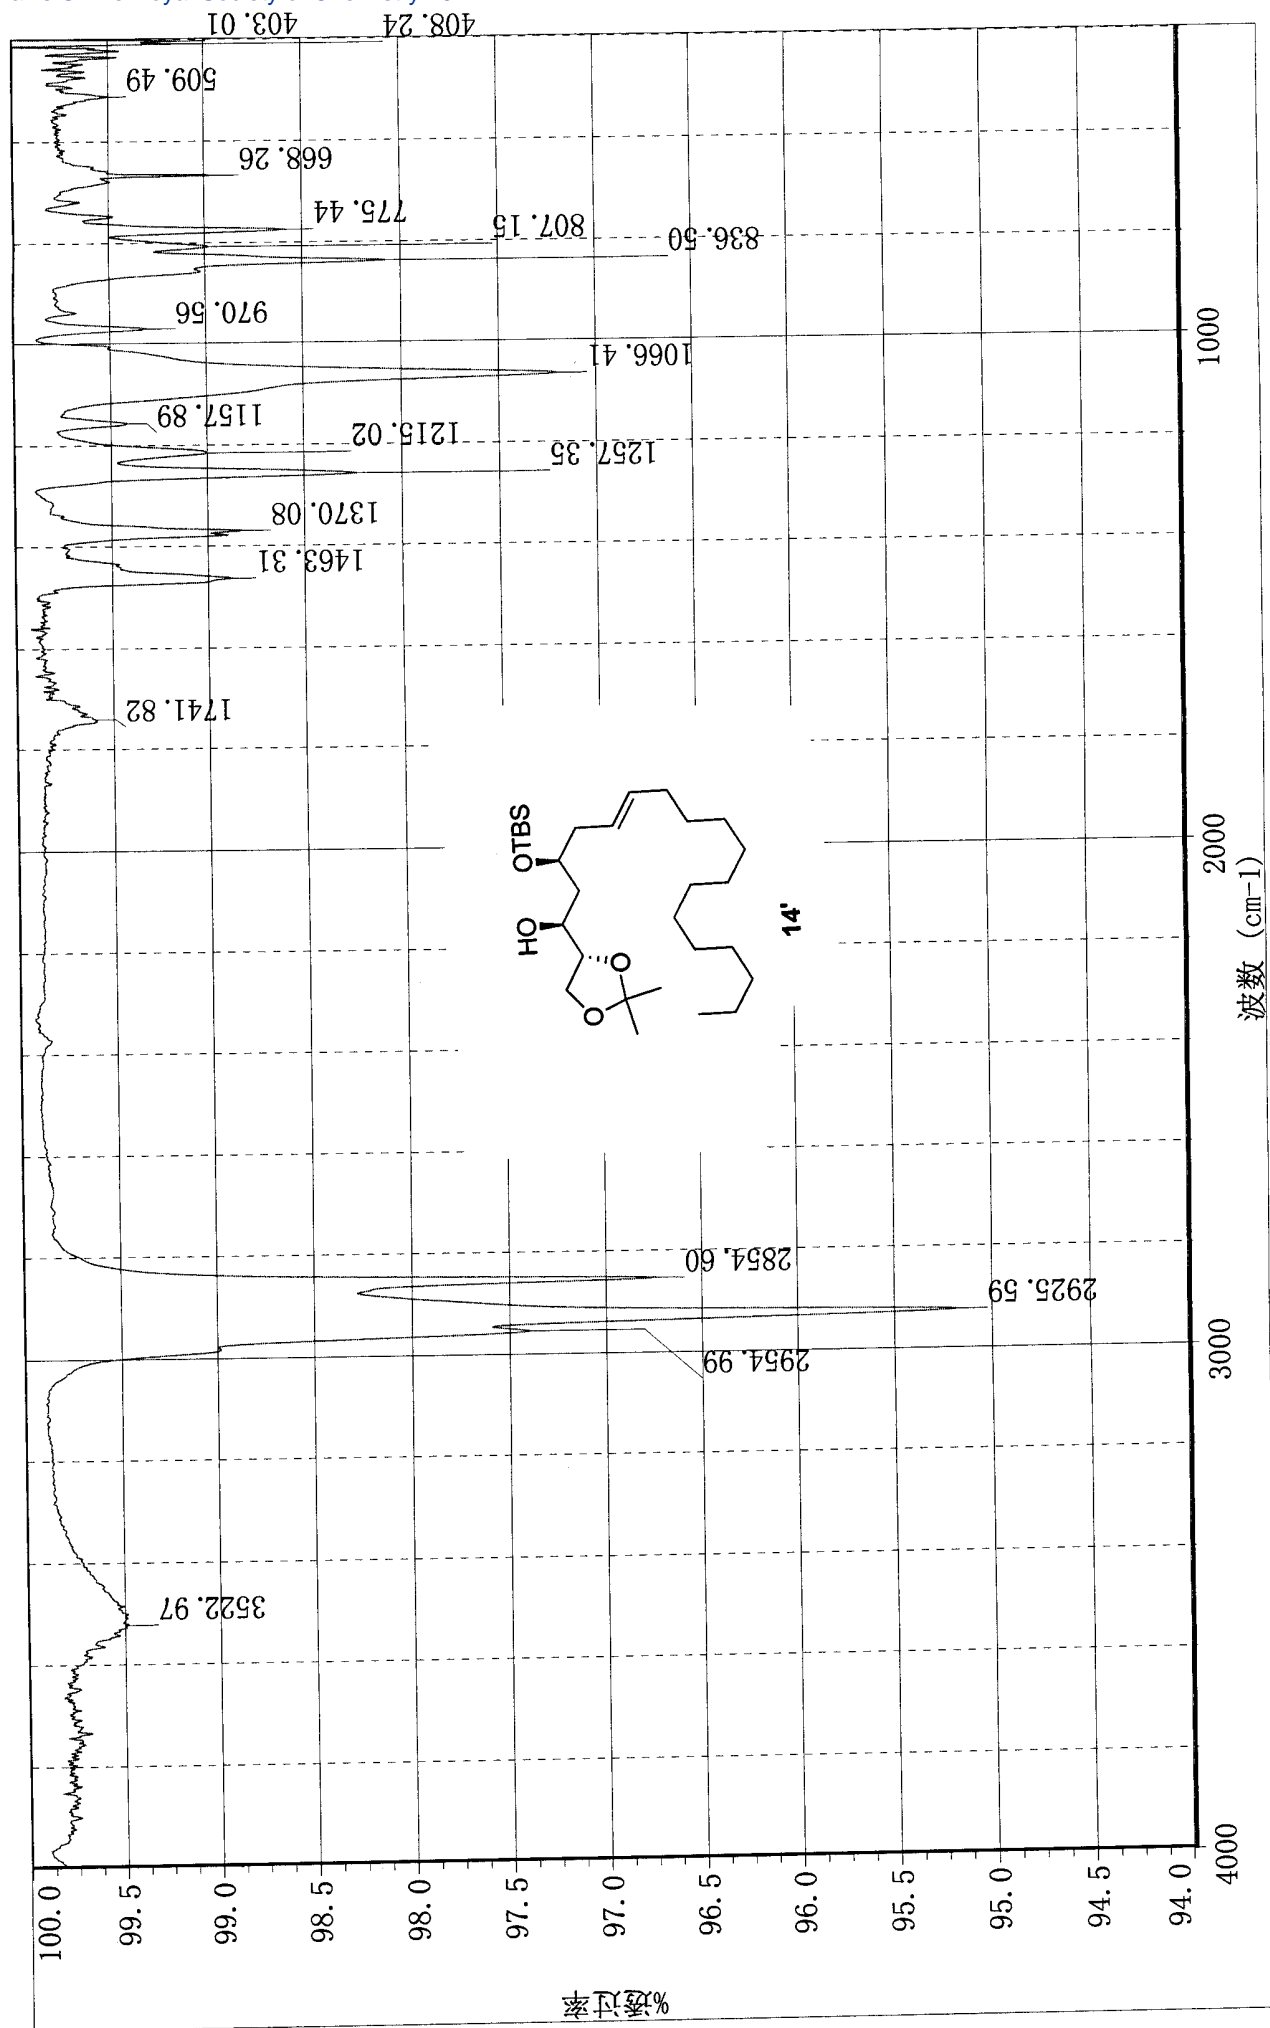

\*\*yx-3-72-1-a

采集时间: 星期二 3月 29 10:06:24 2011 (GMT+08:00)

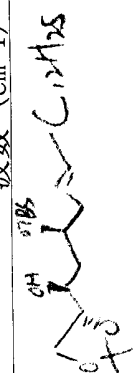

上海有机所生命有机化学国家重点实验室

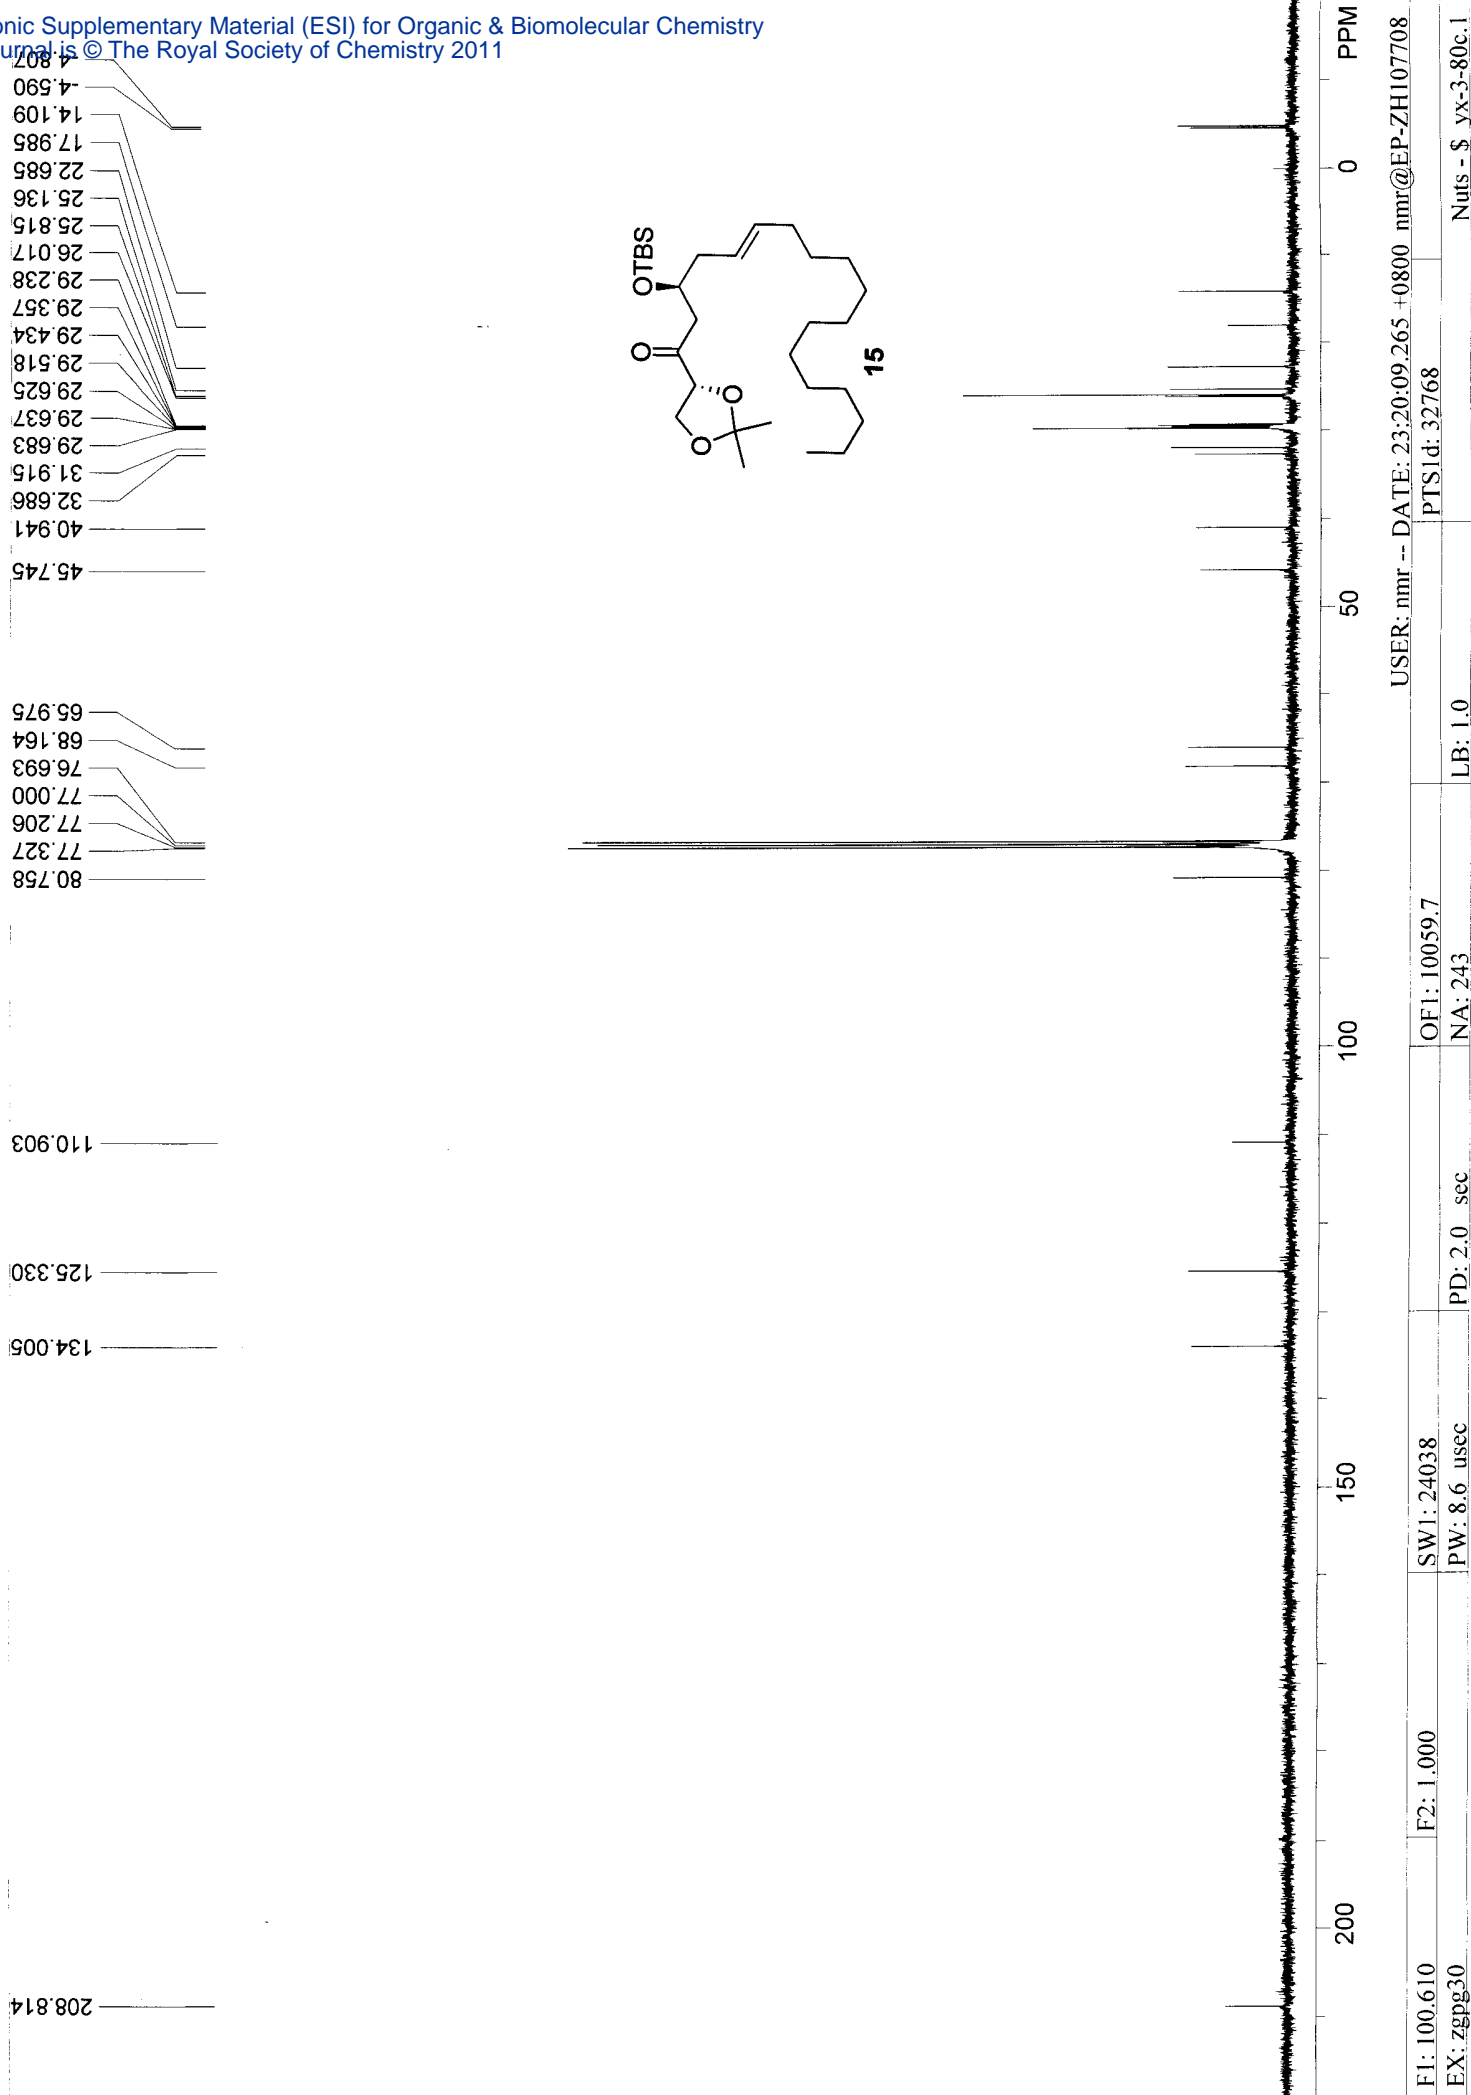

0.063  
0.014  
0.952  
1.253  
1.386  
1.455

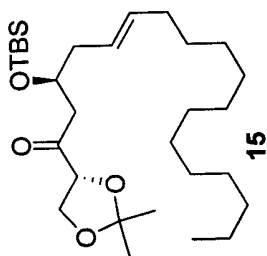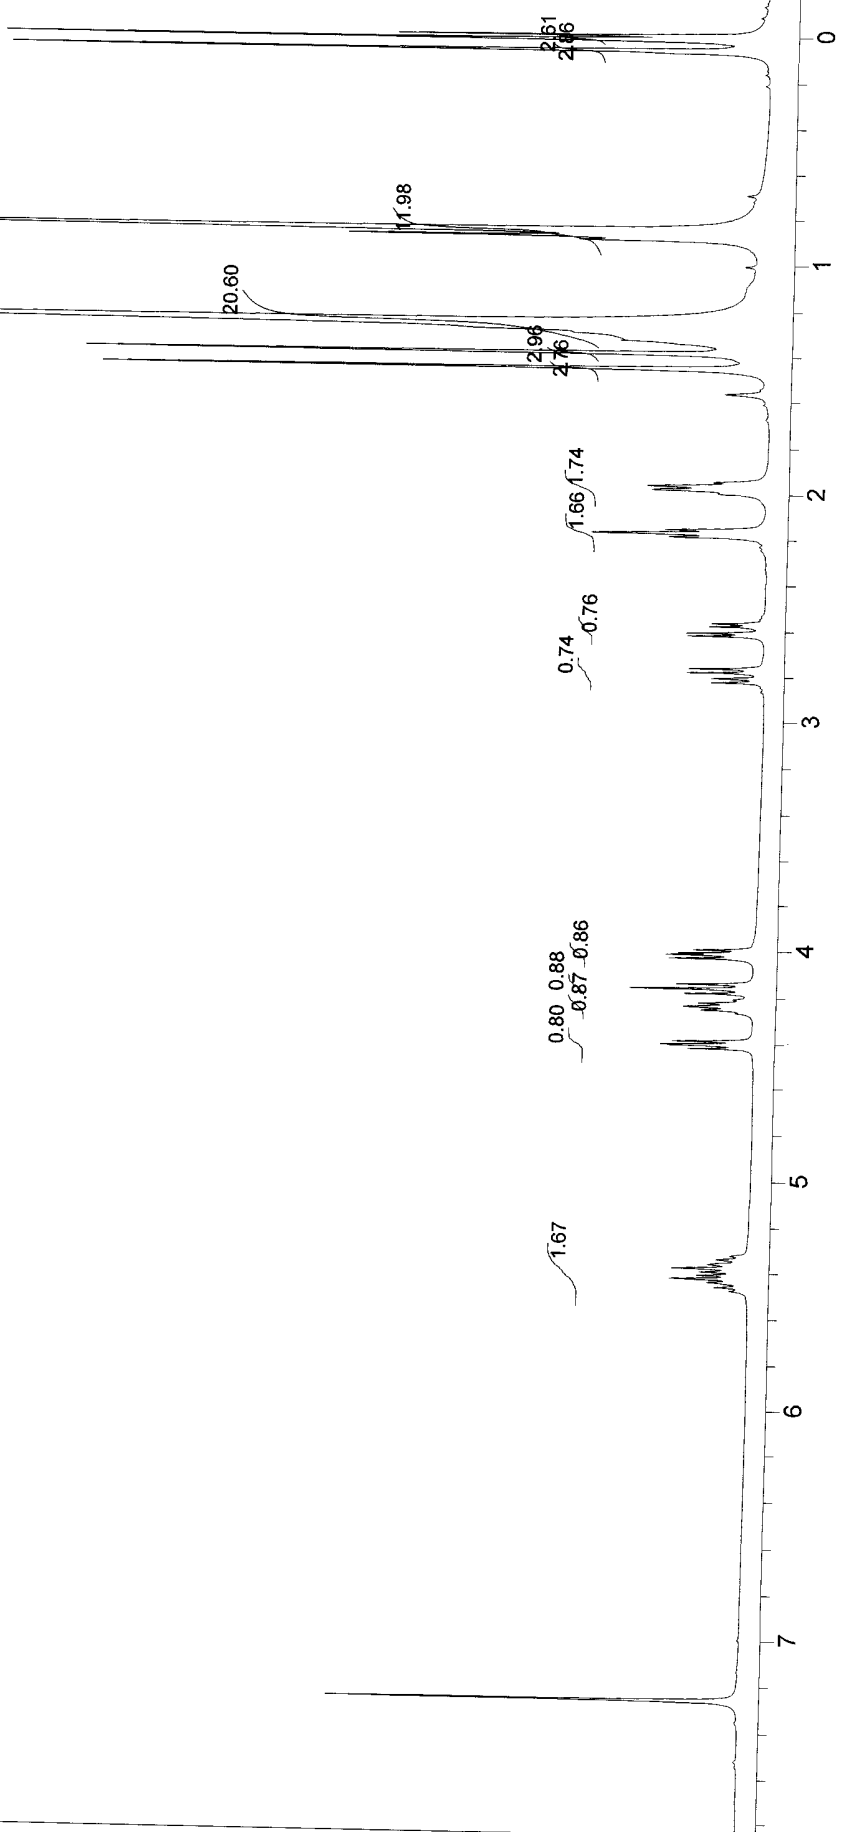

F1: 400.120 F2: 1.000 SW1: 8224  
EX: zg30 PD: 1.0 sec PD: 1.0 sec  
OF1: 2461.0 NA: 16  
USER: nmr -- DATE: 20:54:30.875 +0800 nmr@EP-ZH1107708  
PTSI: 32768 LB: 0.3  
Nuts - \$ \_yx-3-80c.1

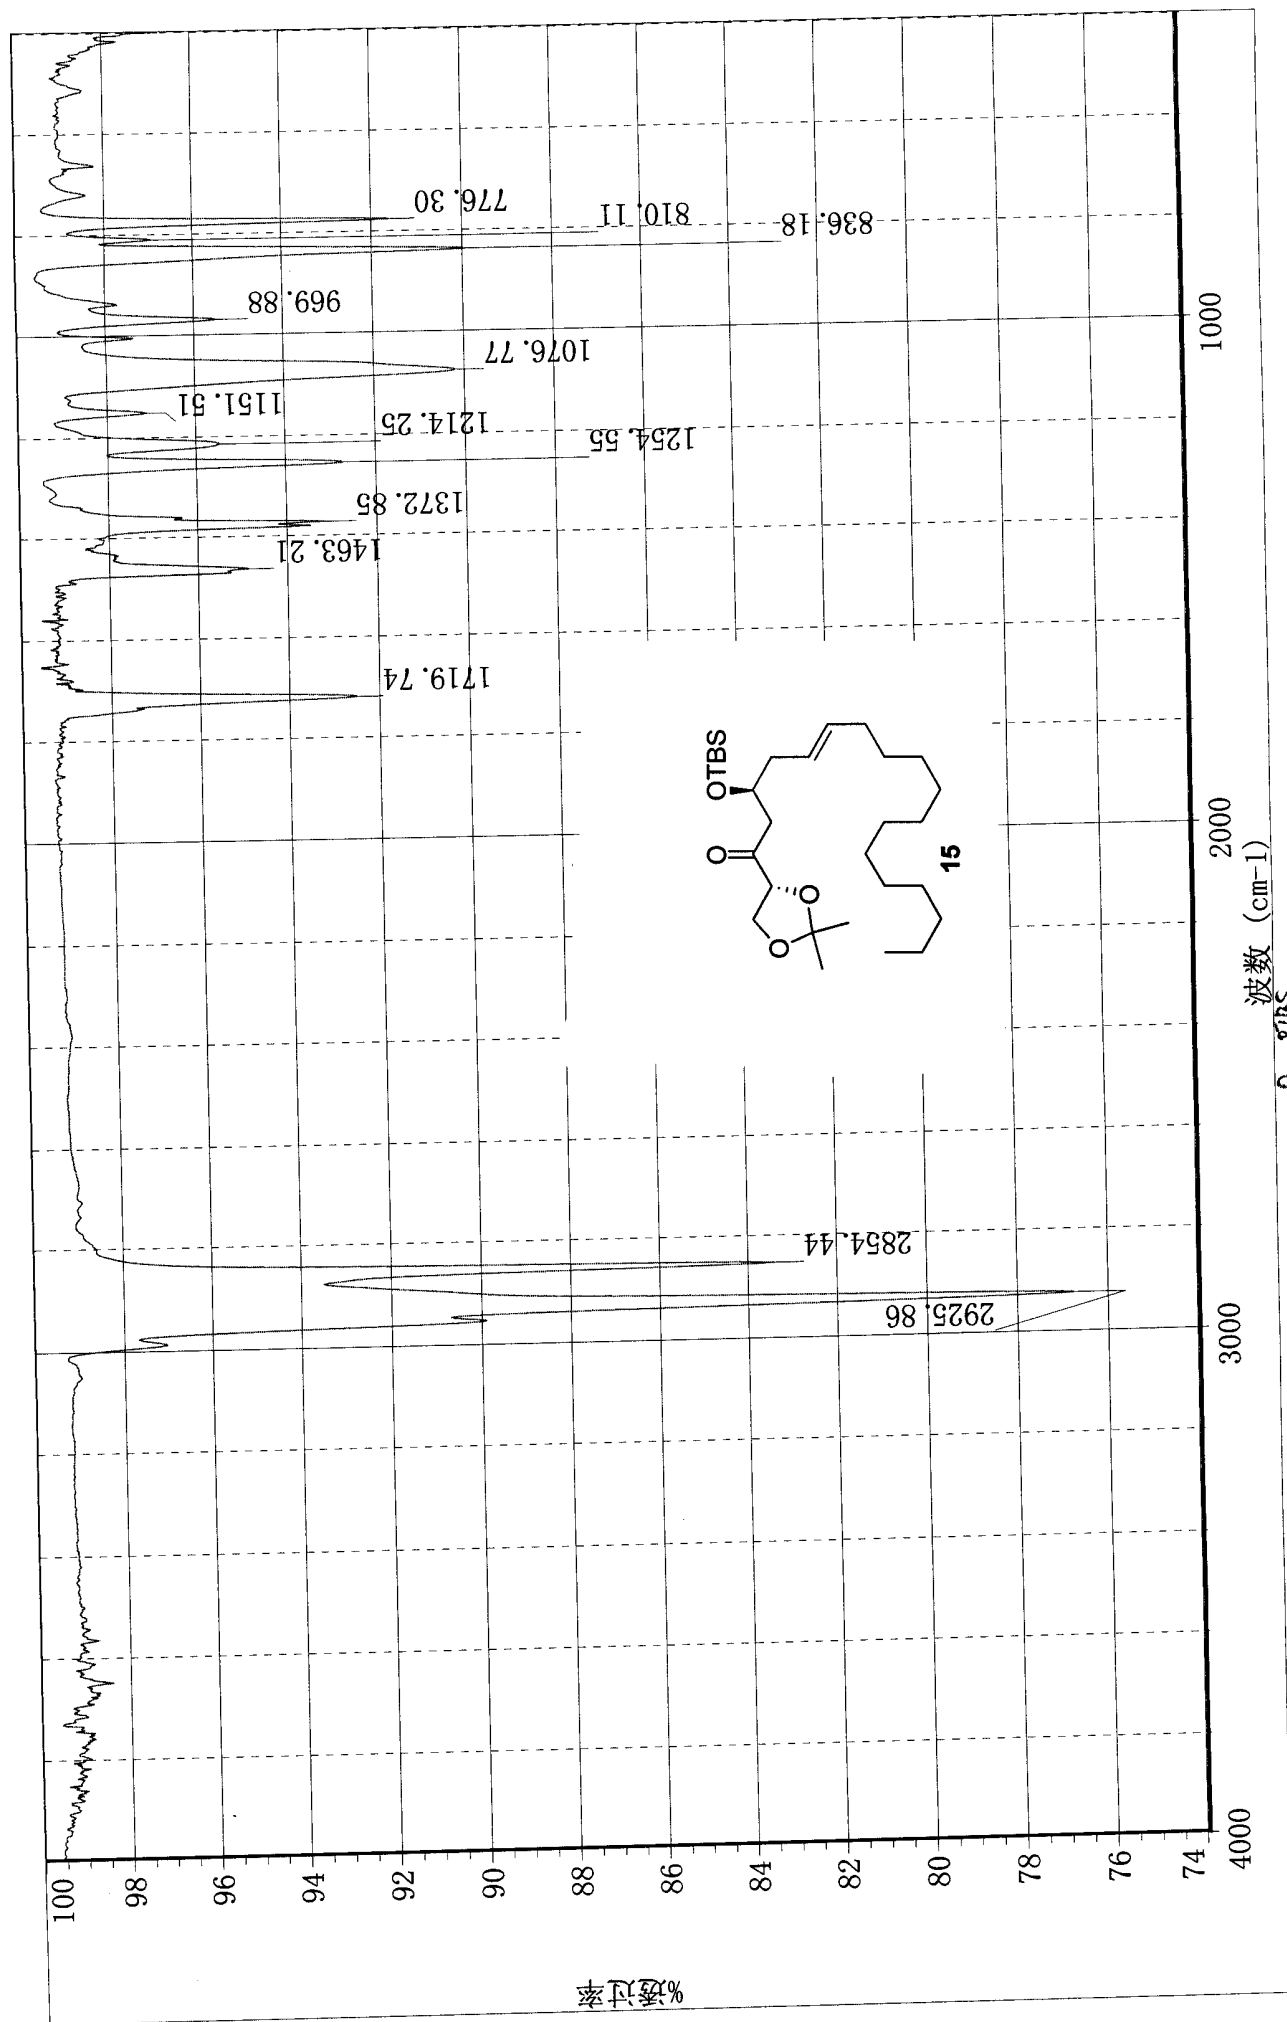

\*\*yx-3-80

采集时间: 星期五 4月 01 18:47:00 2011 (GMT+08:00)

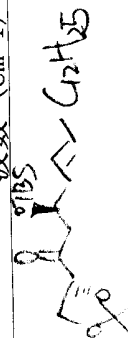

上海有机所生命有机化学国家重点实验室



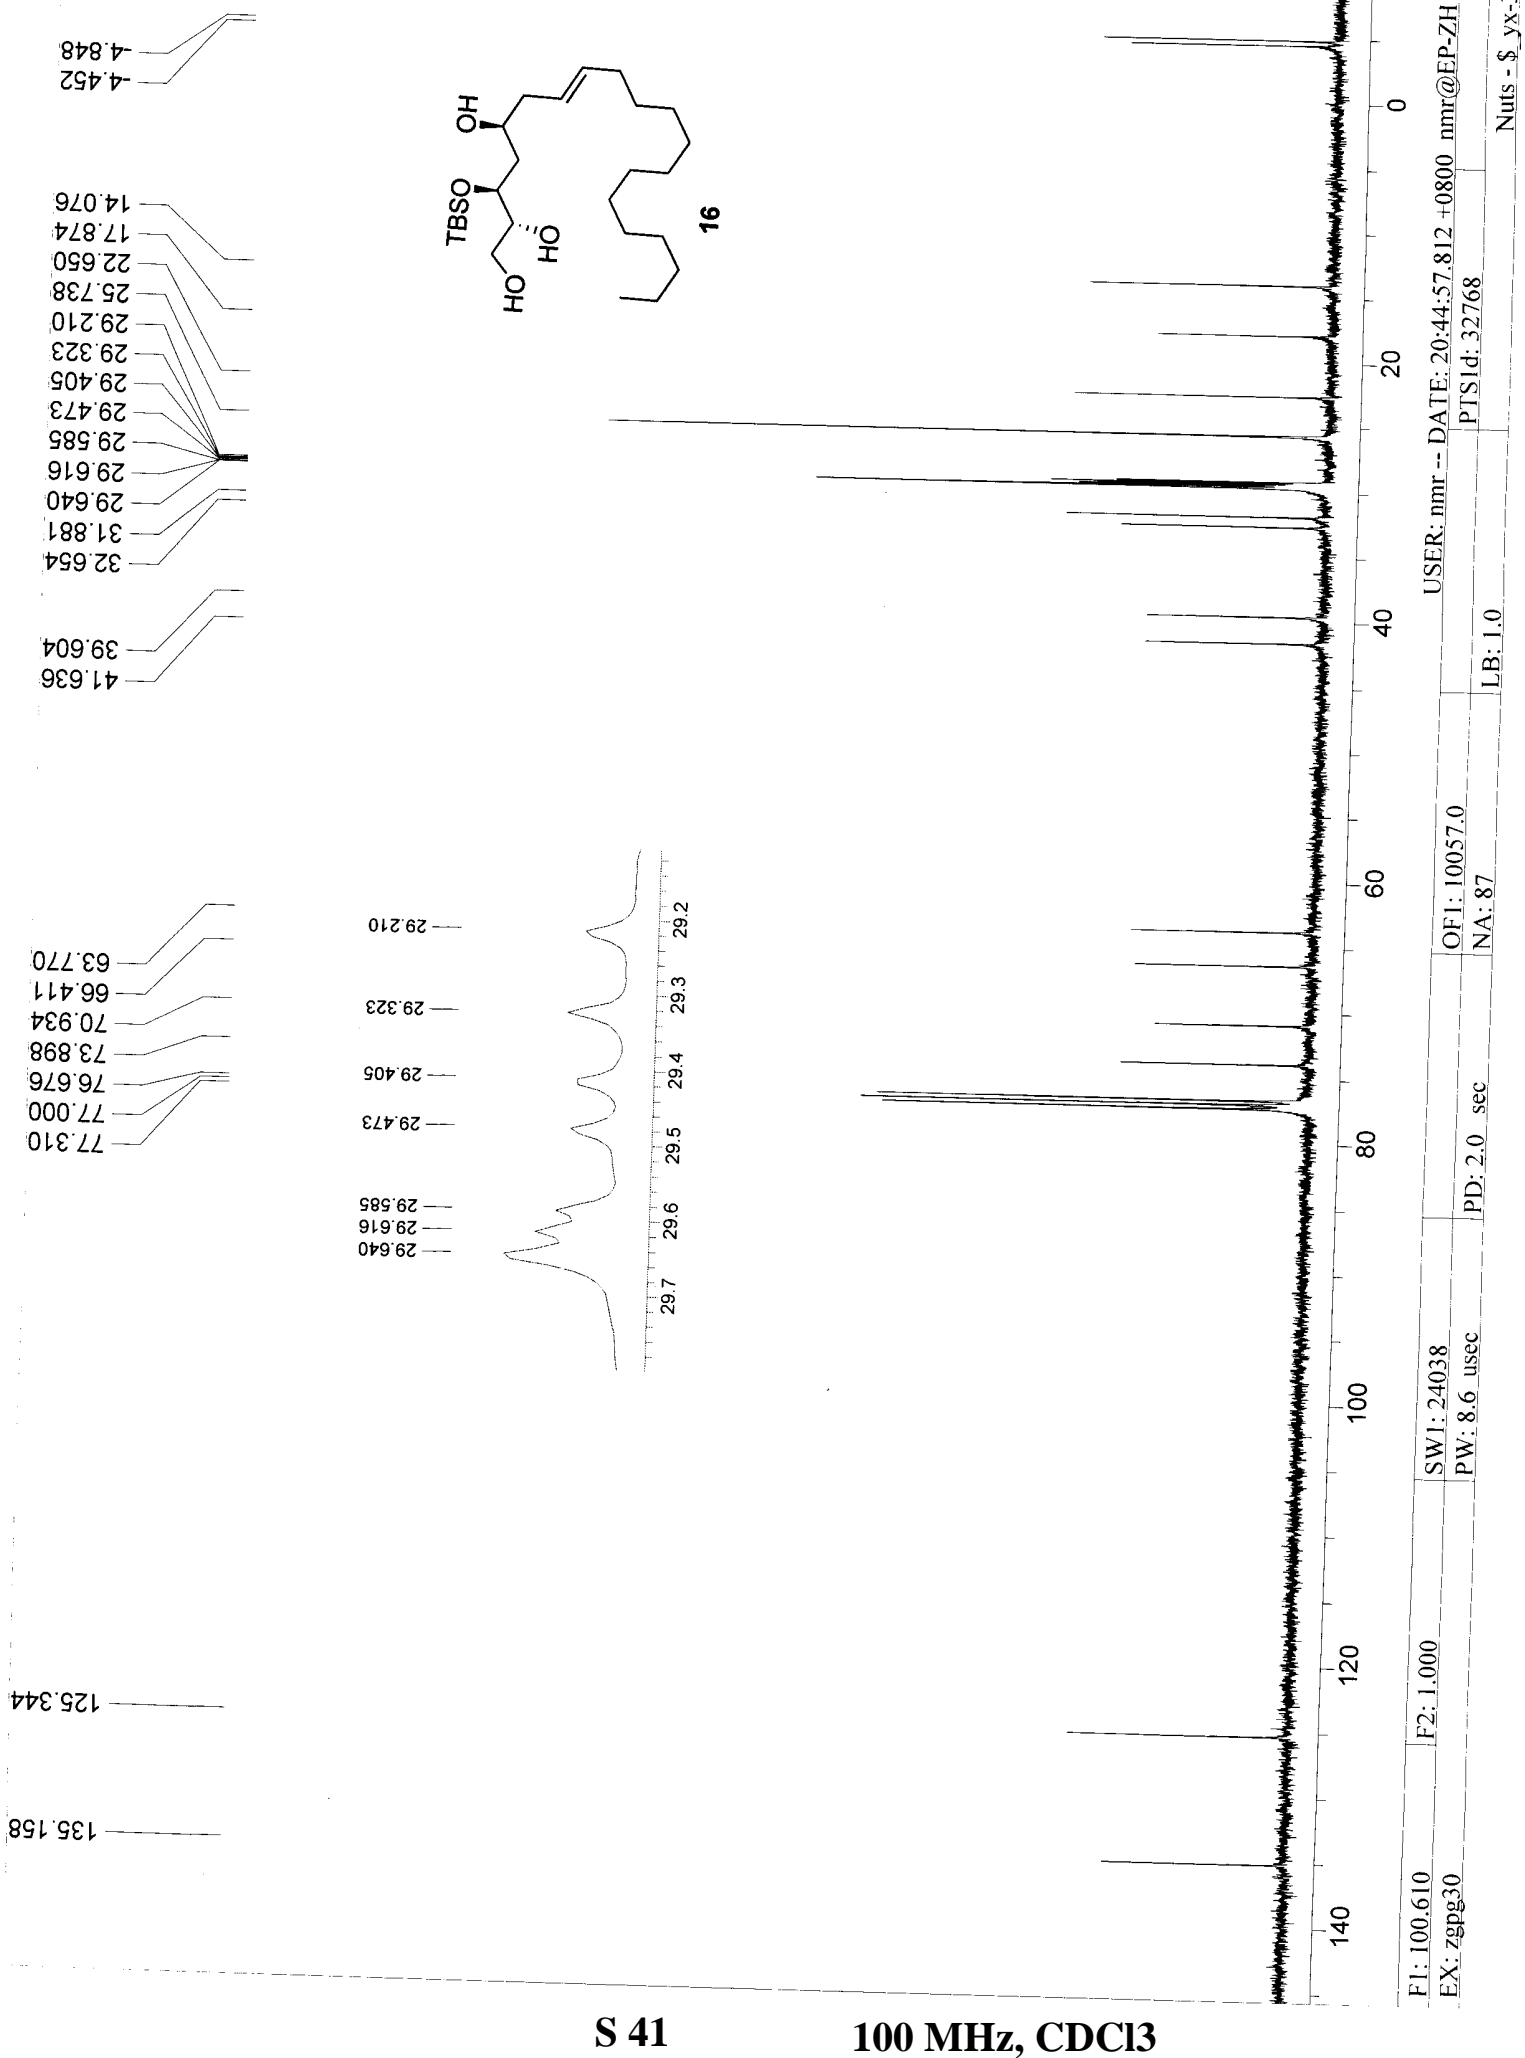

S 41

100 MHz, CDCl<sub>3</sub>

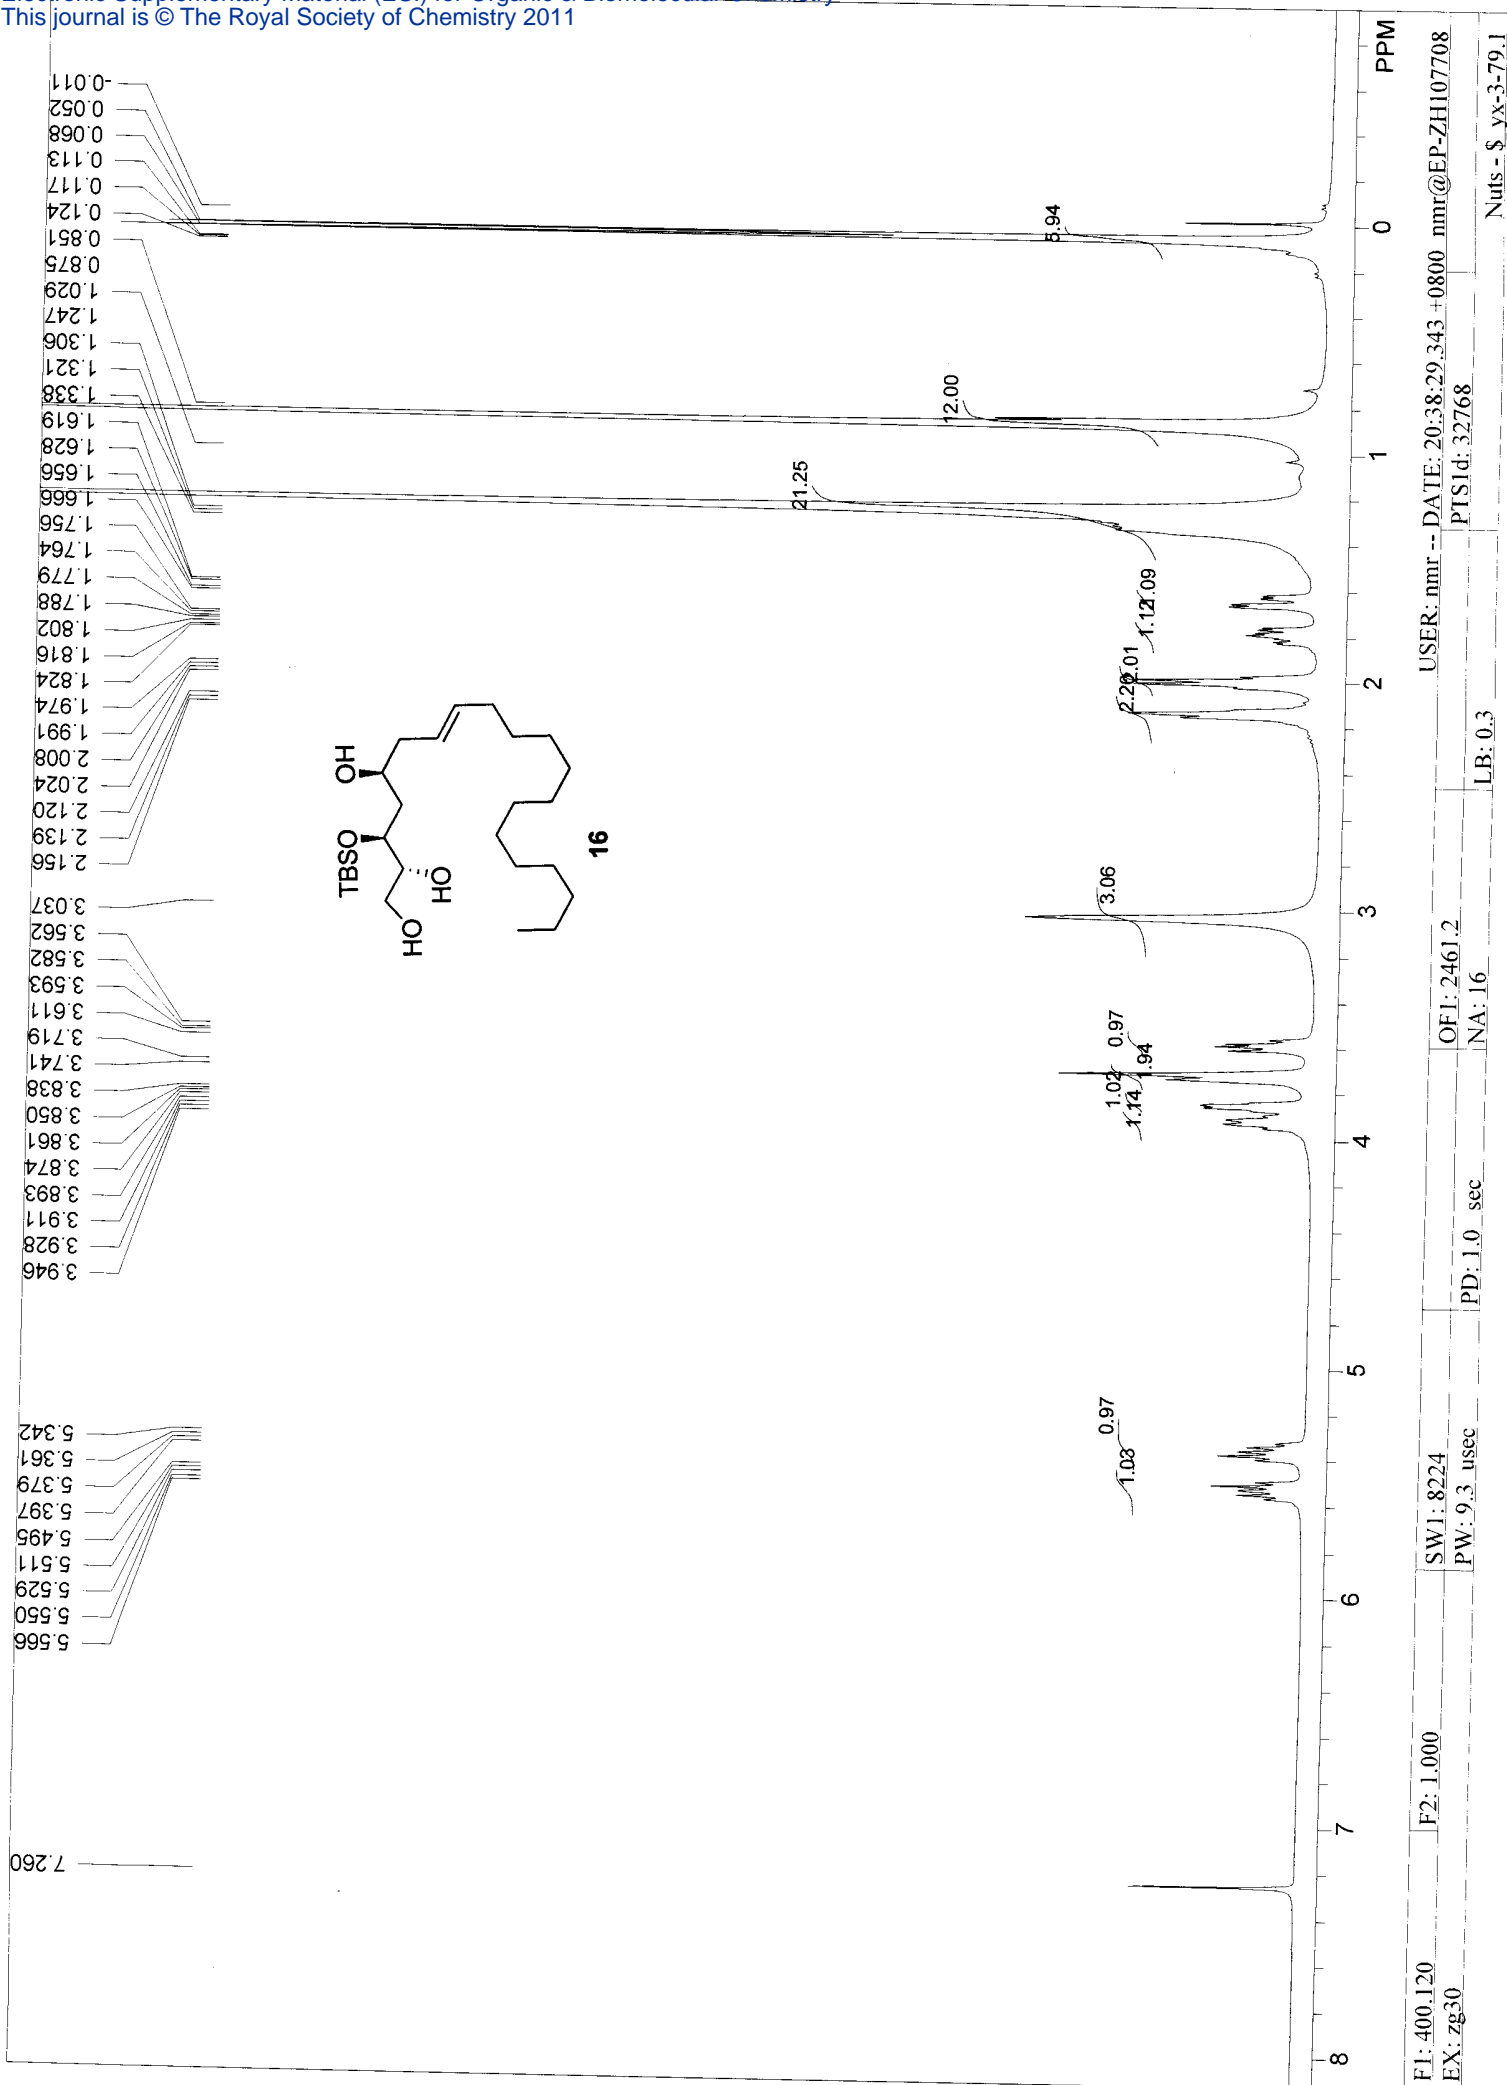

F1: 400.120  
EX: zg30

F2: 1.000

SW1: 8224  
PW: 9.3 usec

PD: 1.0 sec

NA: 16

OF1: 2461.2

PTSId: 32768

USER: nmr -- DATE: 20:38:29.343 +0800 nmr@EP-ZHI07708

LB: 0.3

Nuts - \$ \_yx-3-79.1

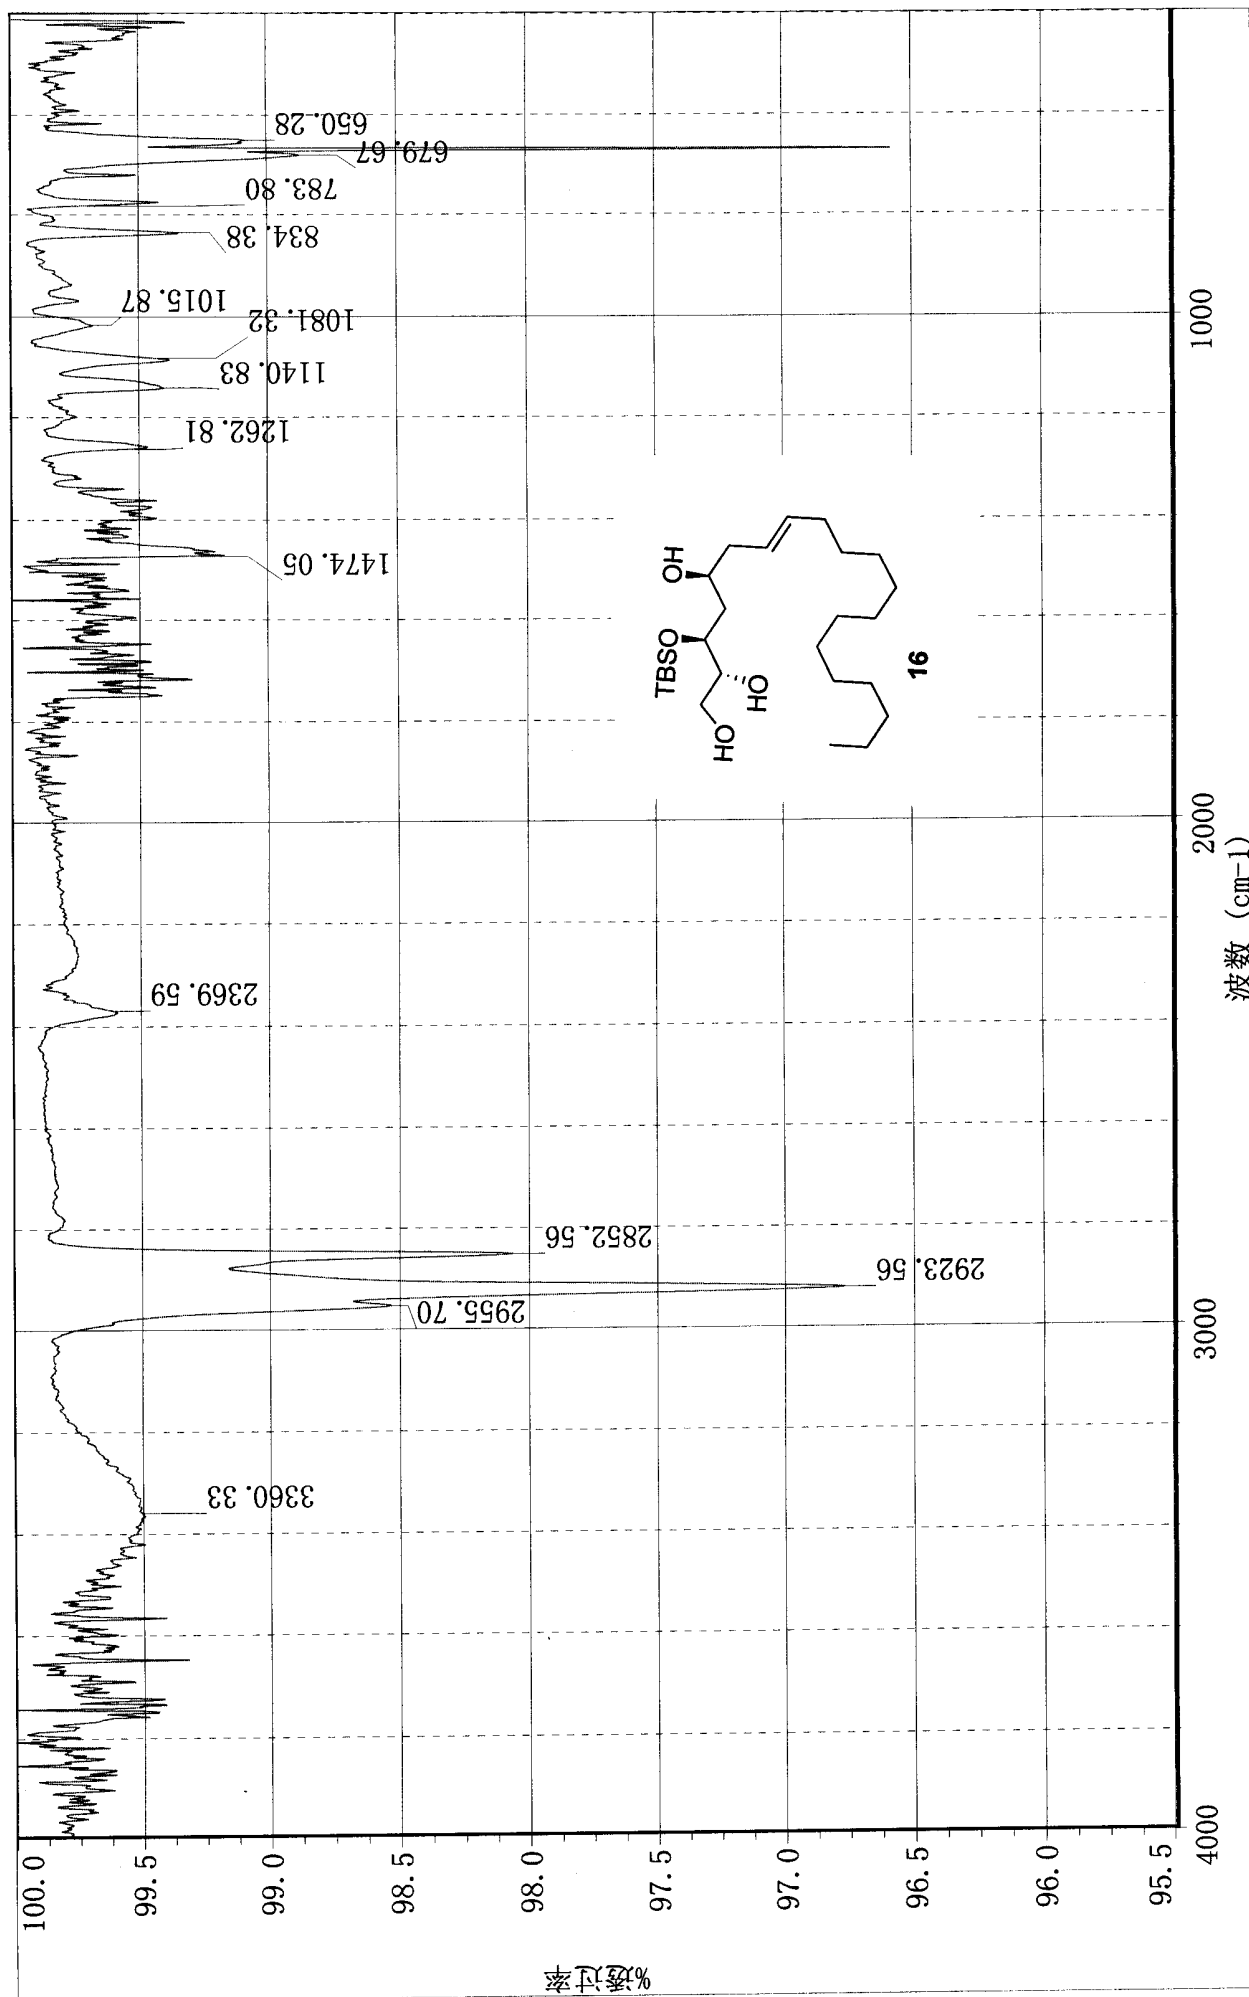

\*\*yx-3-79

采集时间: 星期一 5月 09 10:44:51 2011 (GMT+08:00)

Handwritten signature and initials.

上海有机所生命有机化学国家重点实验室

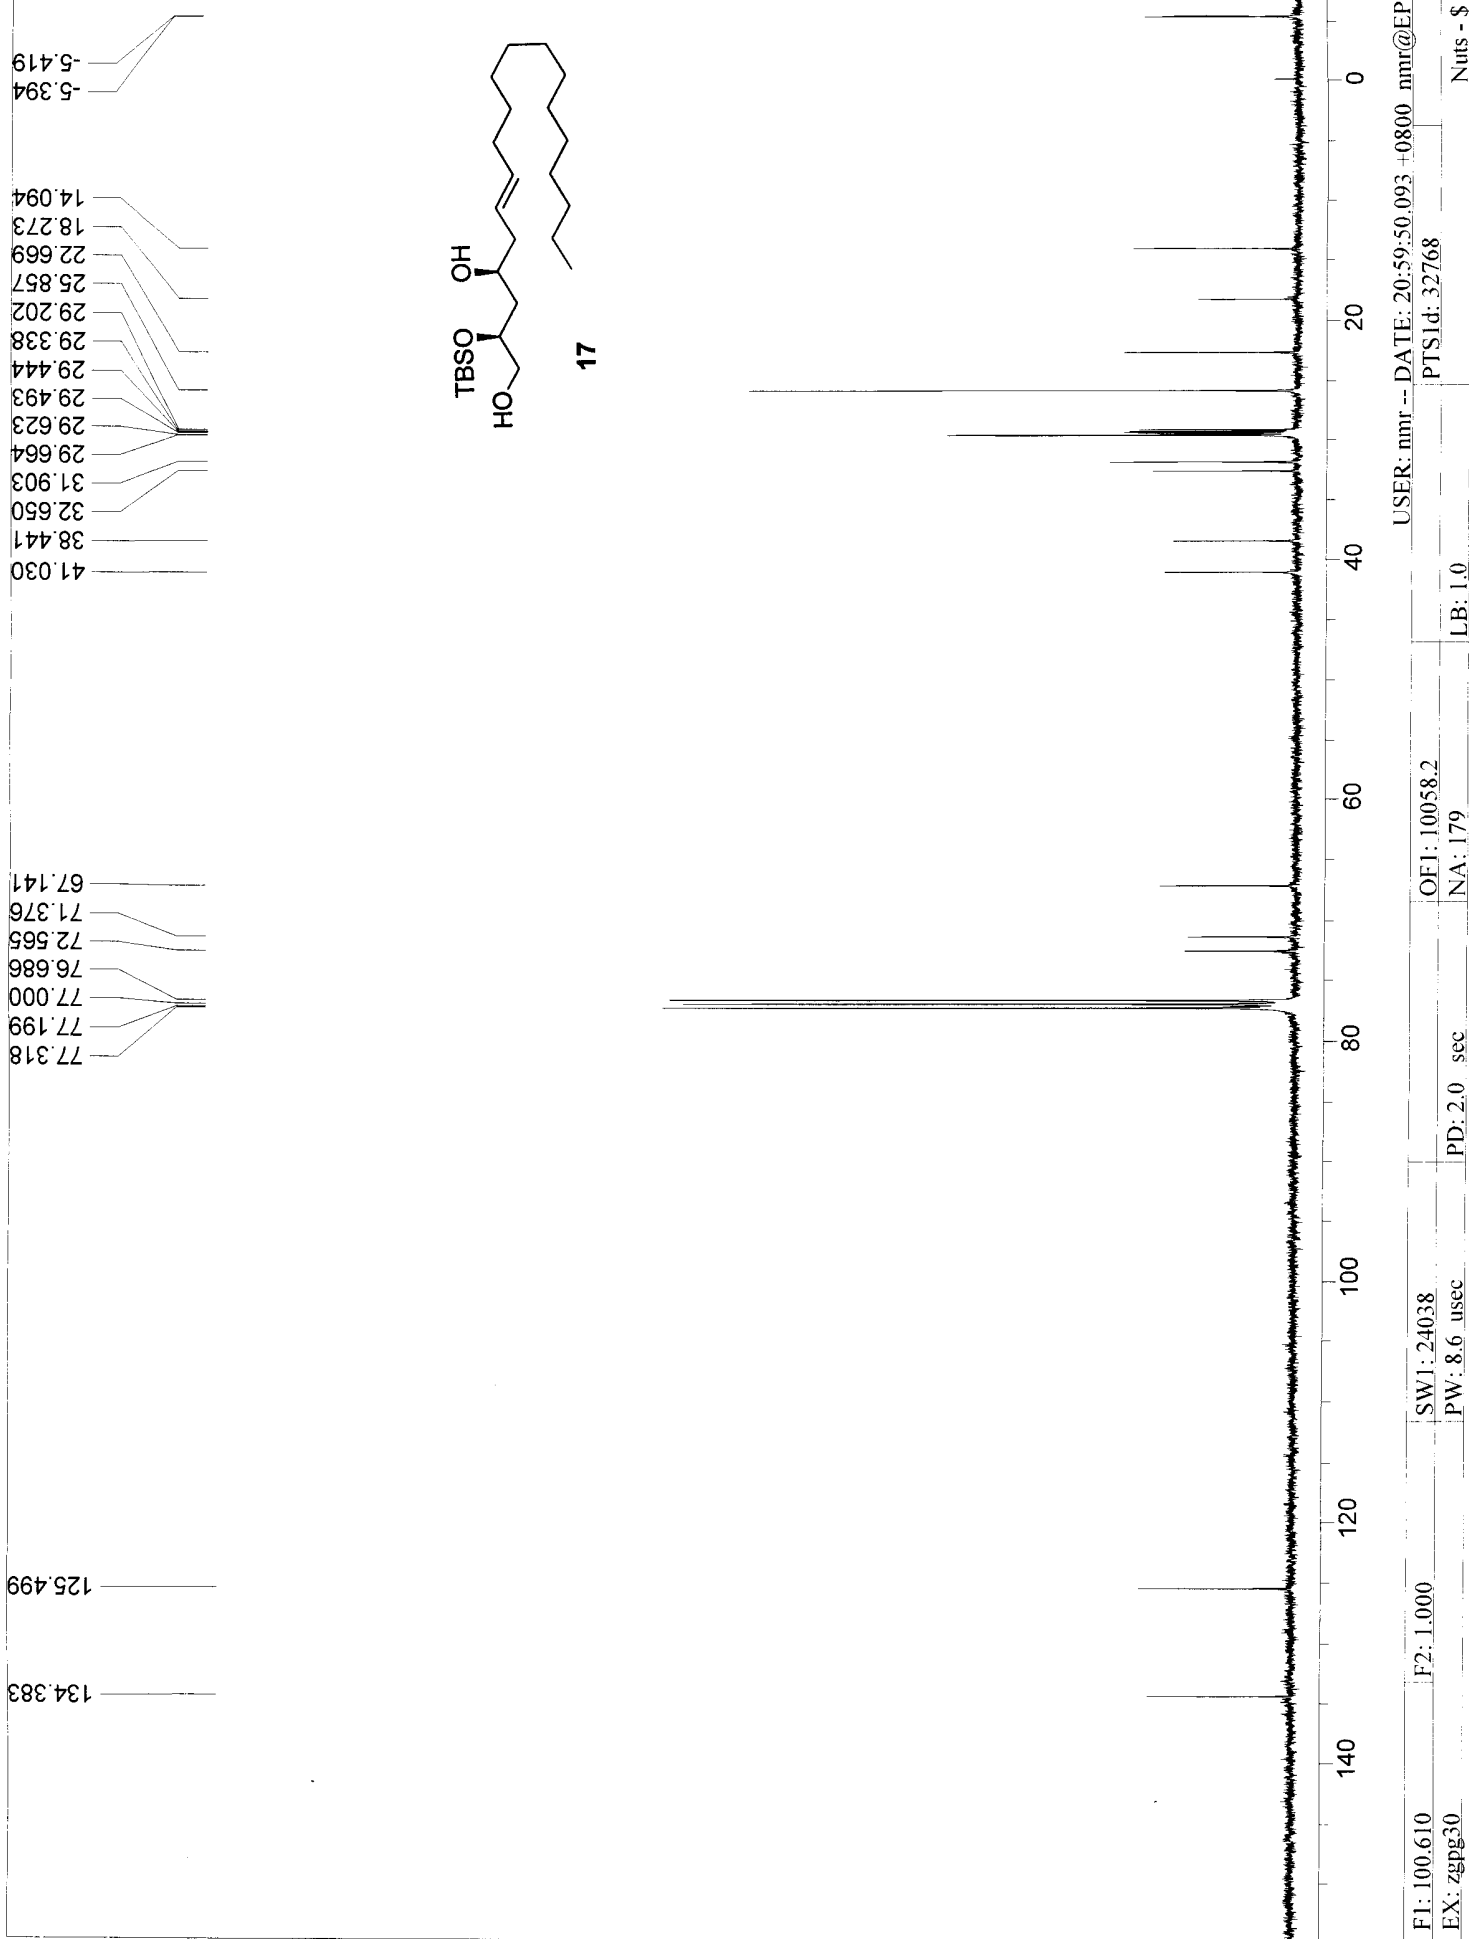

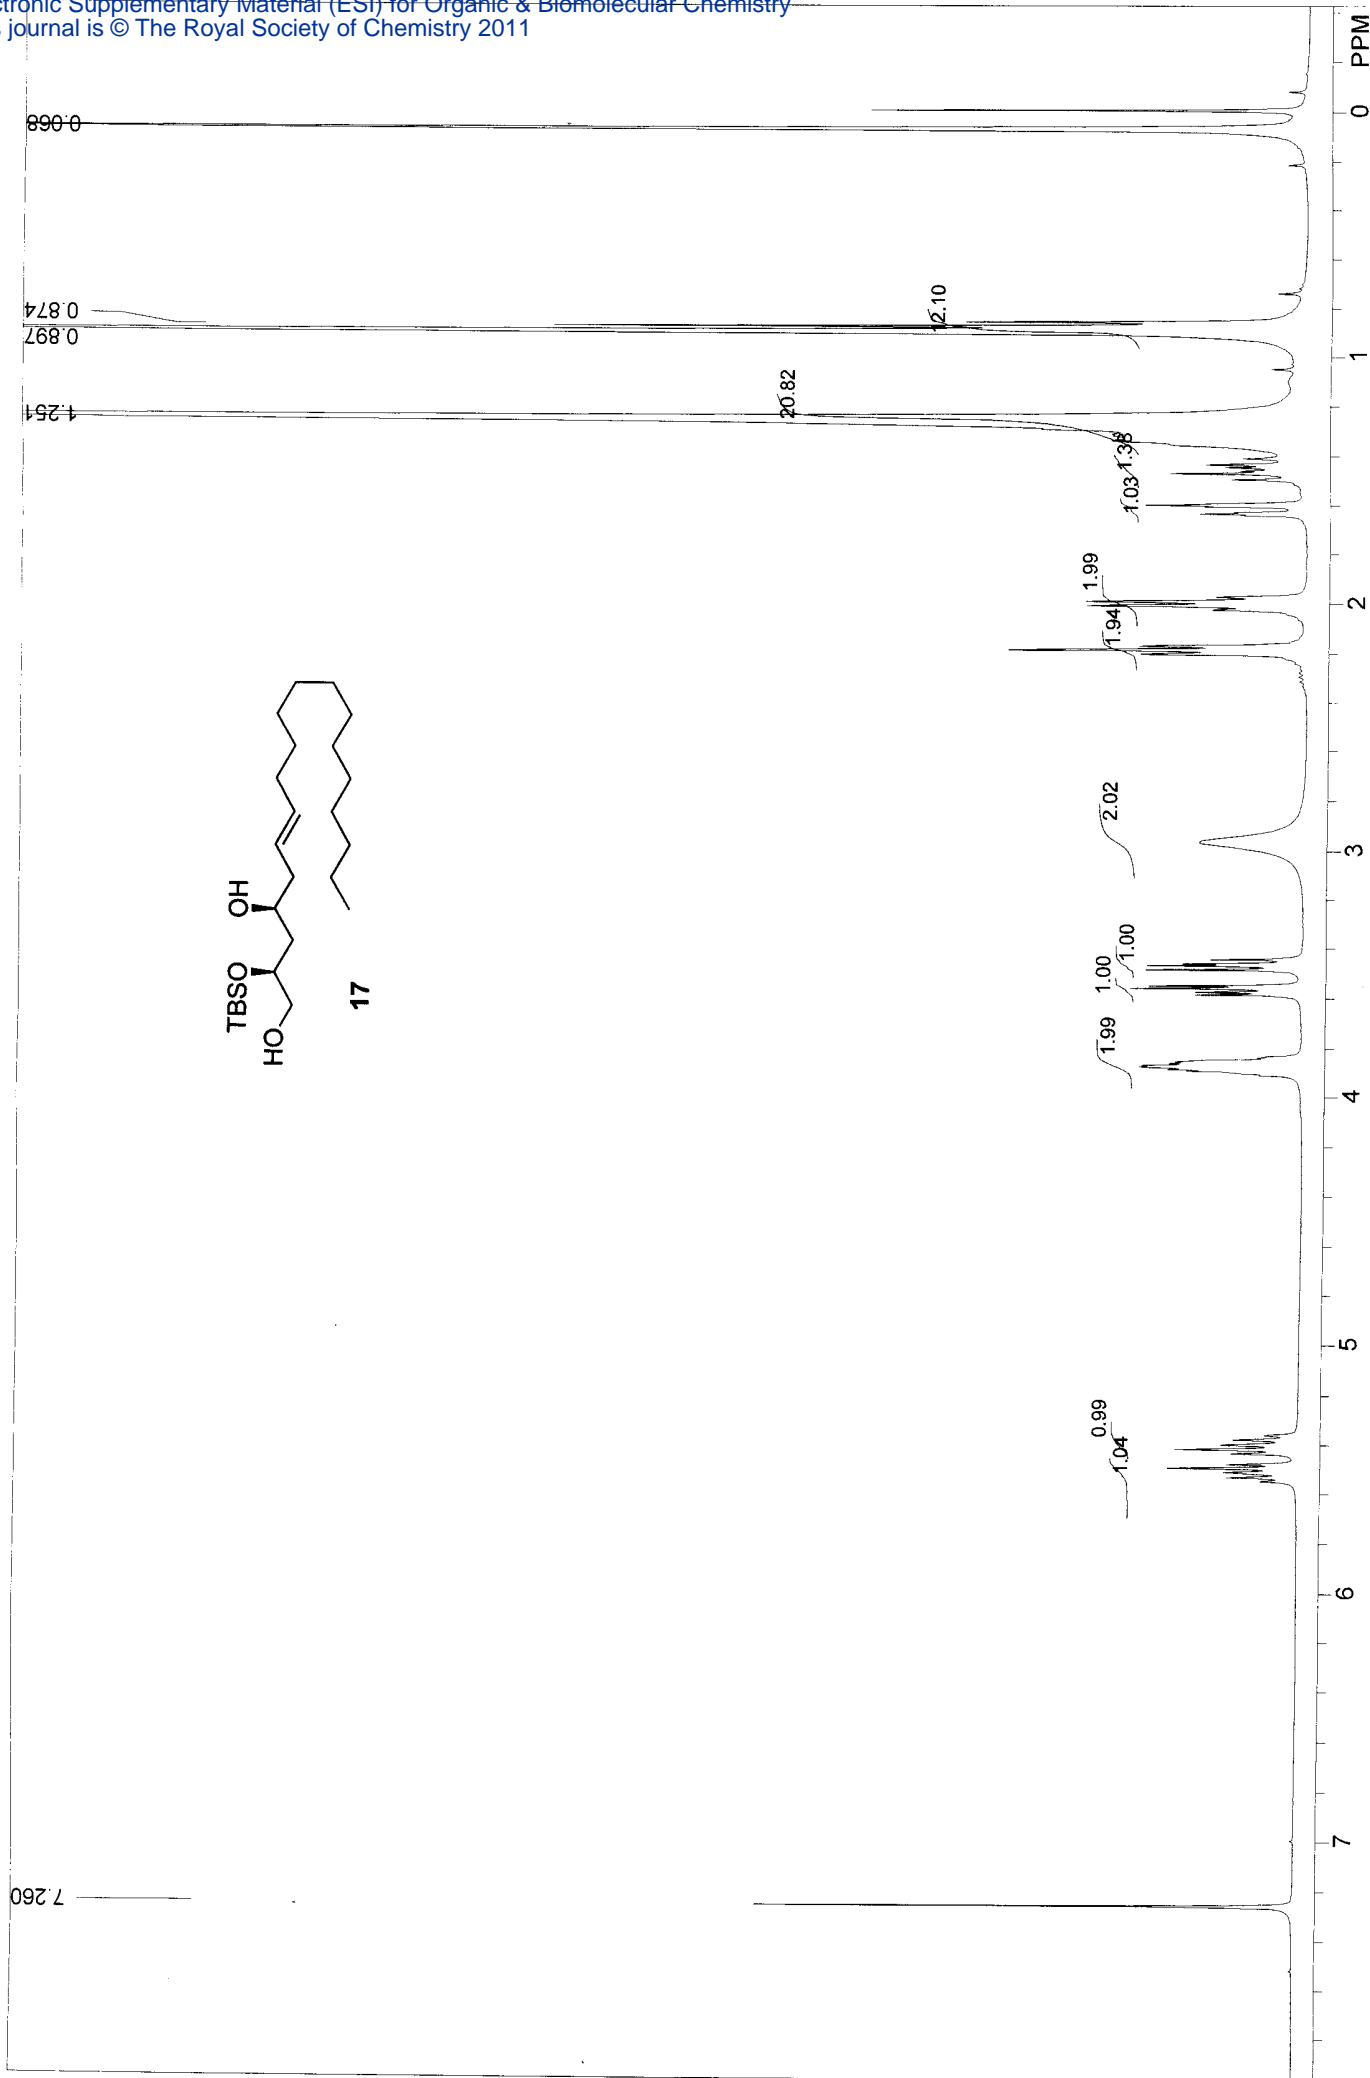

USER: nmr -- DATE: 21-02-2011 08:00 nmr@EP-ZHI07708

PTS1d: 32768

LB: 0.3

OF1: 2461.0

NA: 16

PD: 1.0 sec

SW1: 8224

PW: 9.3 usec

F2: 1.000

F1: 400.120

EX: zg30

Nuts - \$ yx-3-83.1

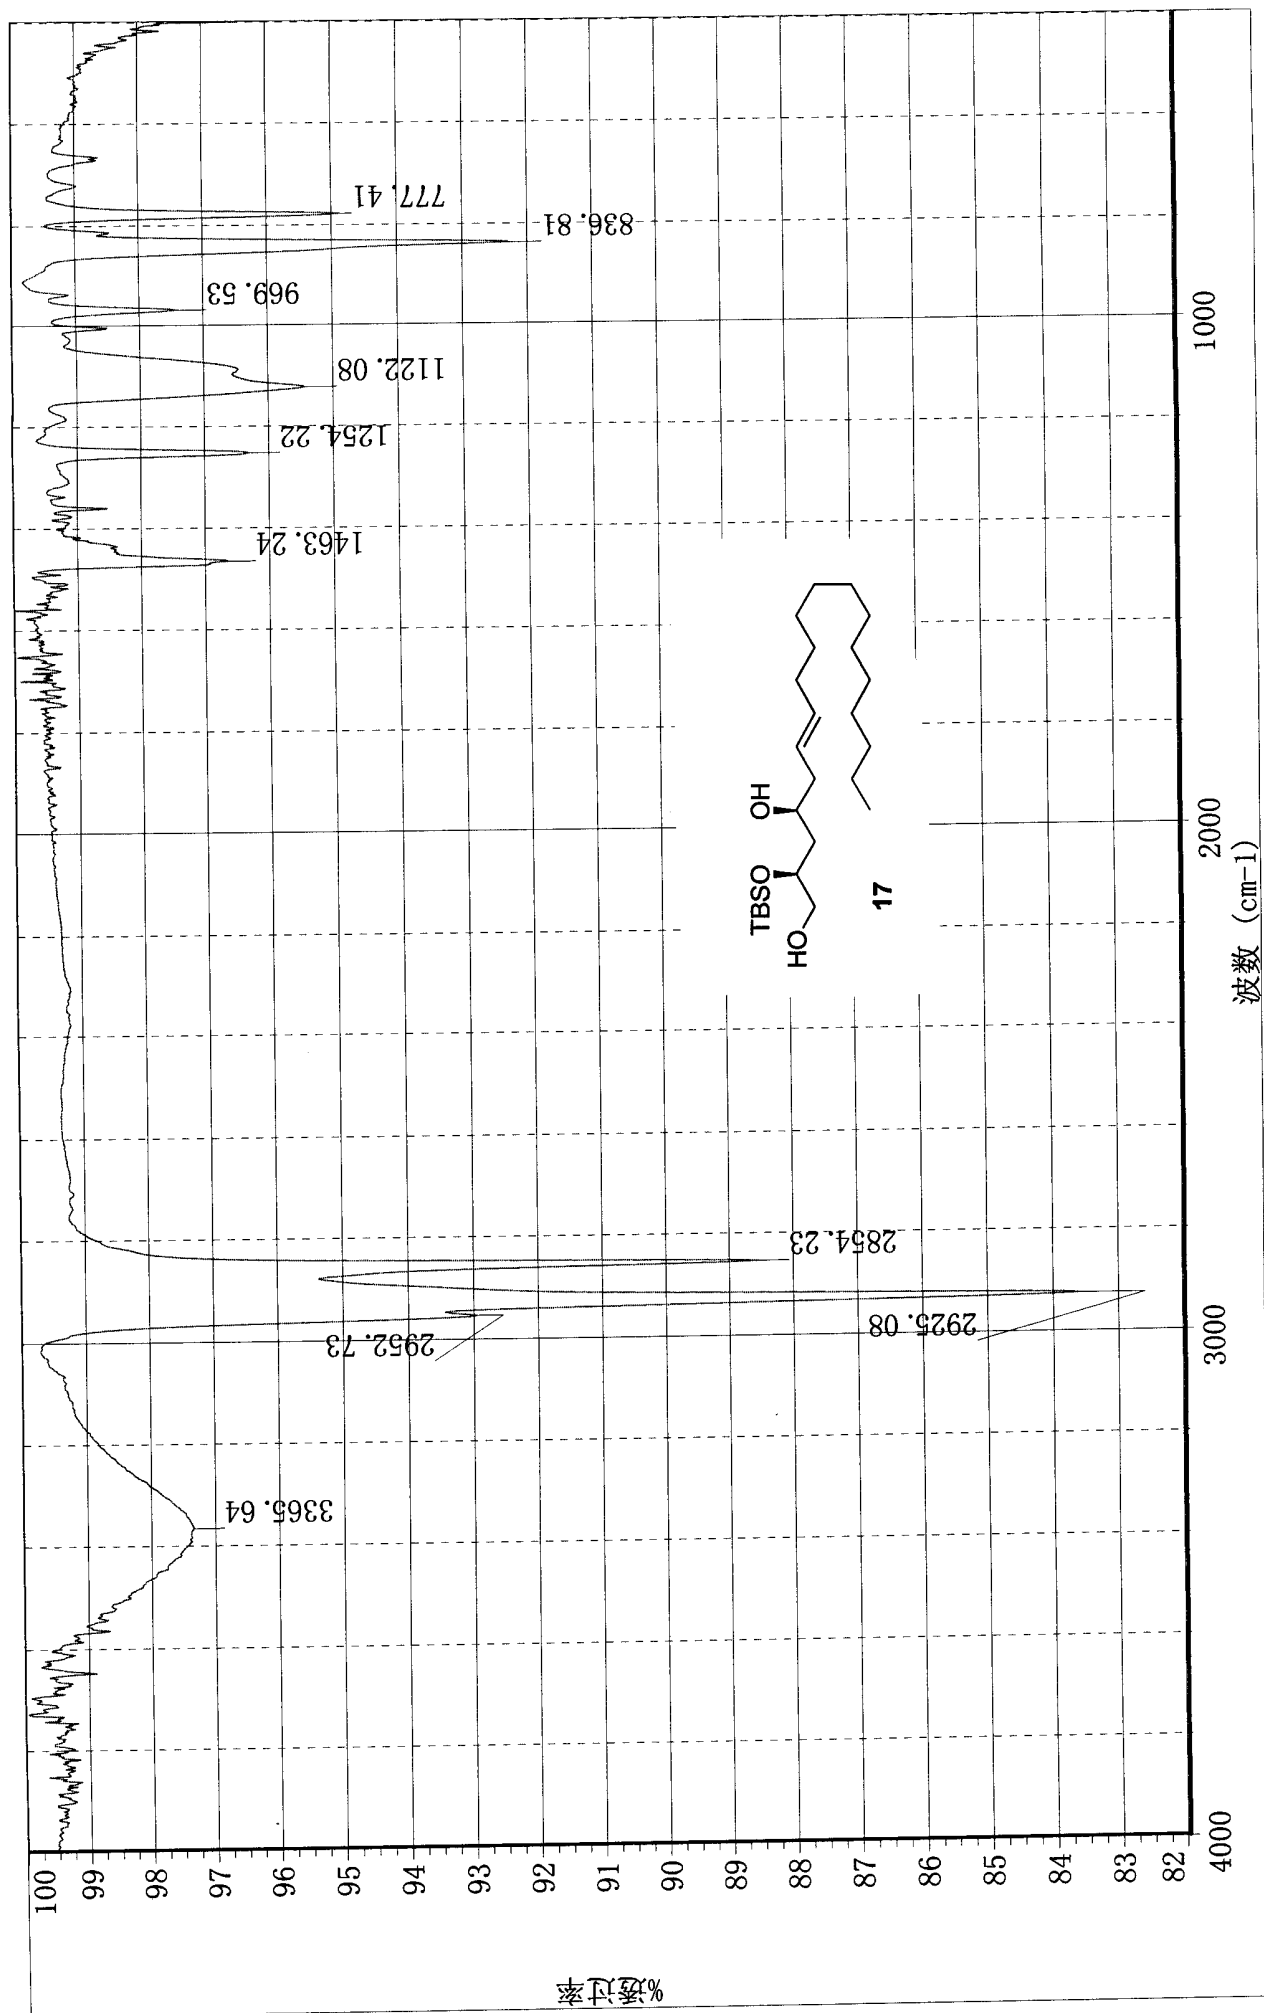

\*yx-3-83

采集时间: 星期五 4月 01 18:59:16 2011 (GMT+08:00)

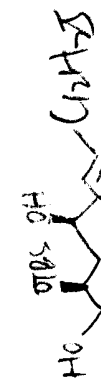

上海有机所生命有机化学国家重点实验室

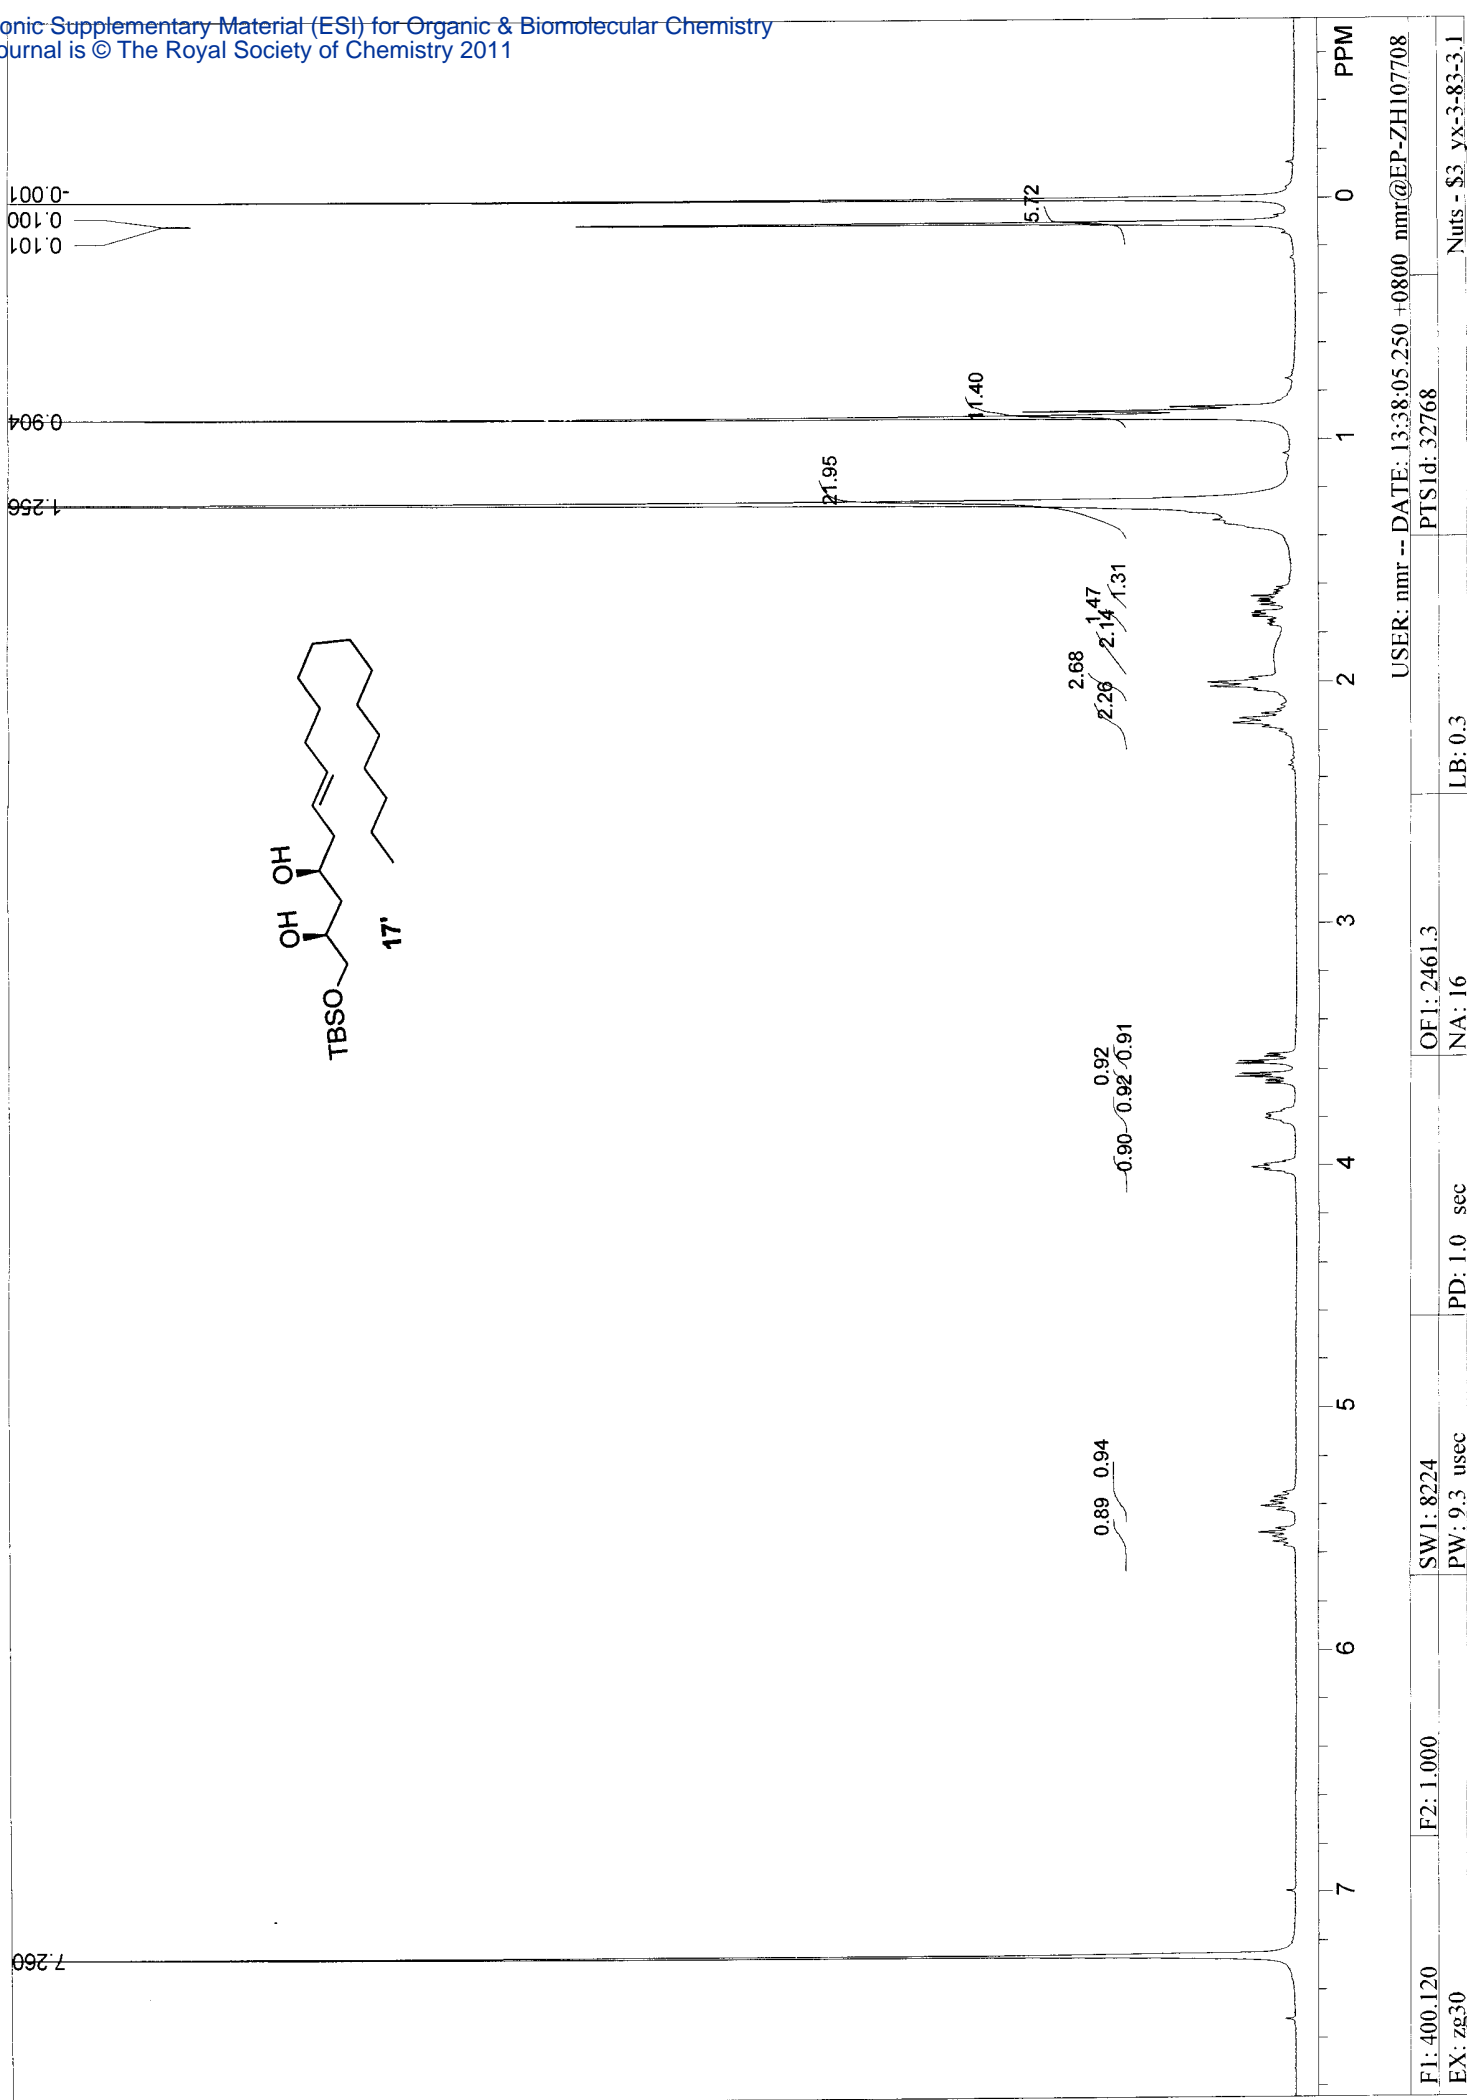

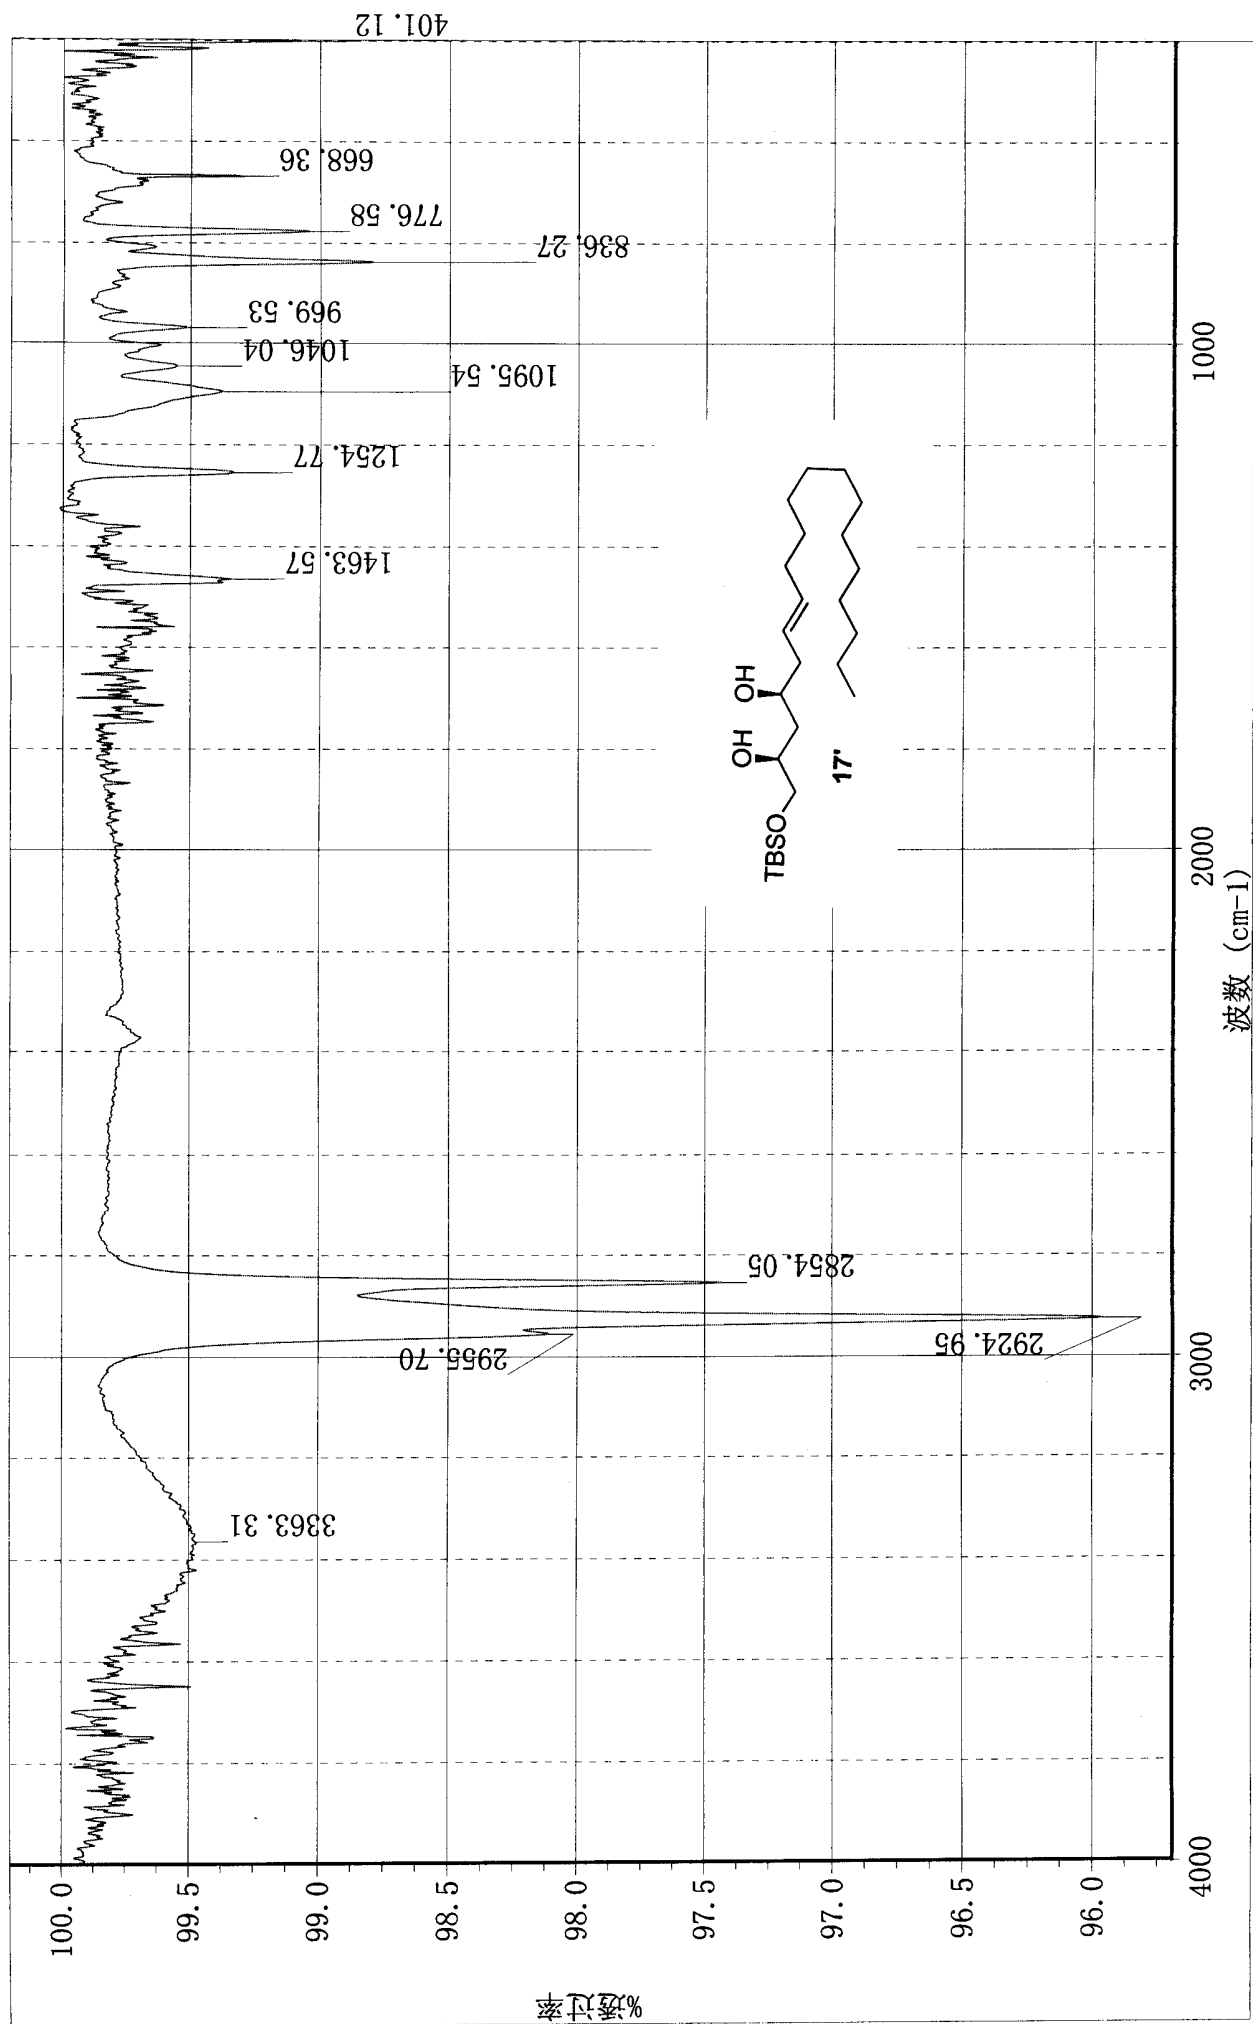

\*\*yx-3-83-3

采集时间: 星期一 5月 09 10:32:43 2011 (GMT+08:00)

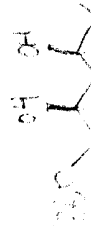

Gr 175 上海有机所生命有机化学国家重点实验室



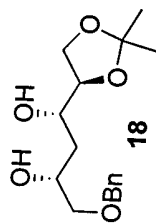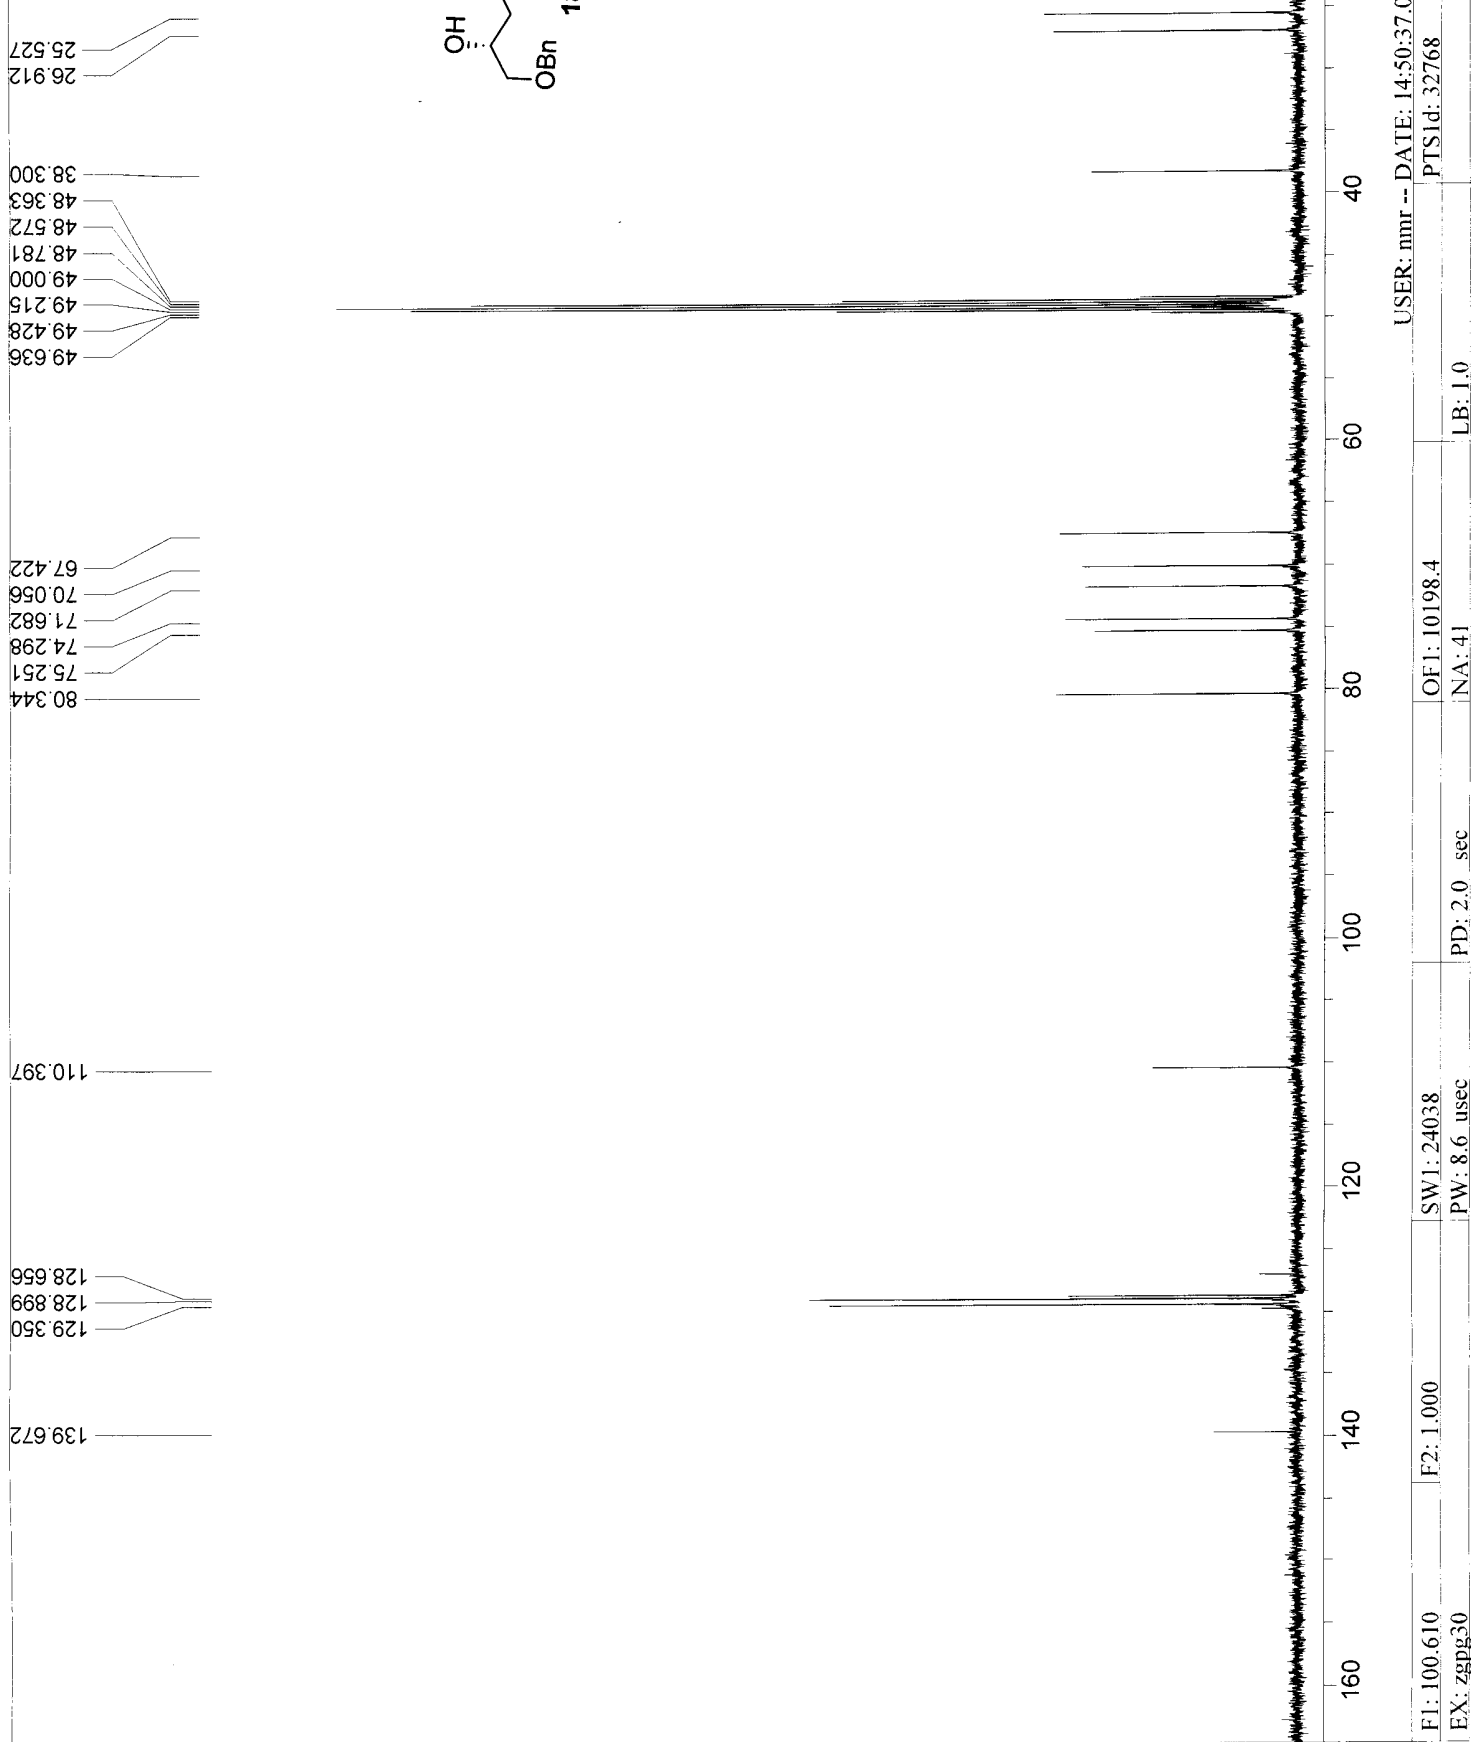

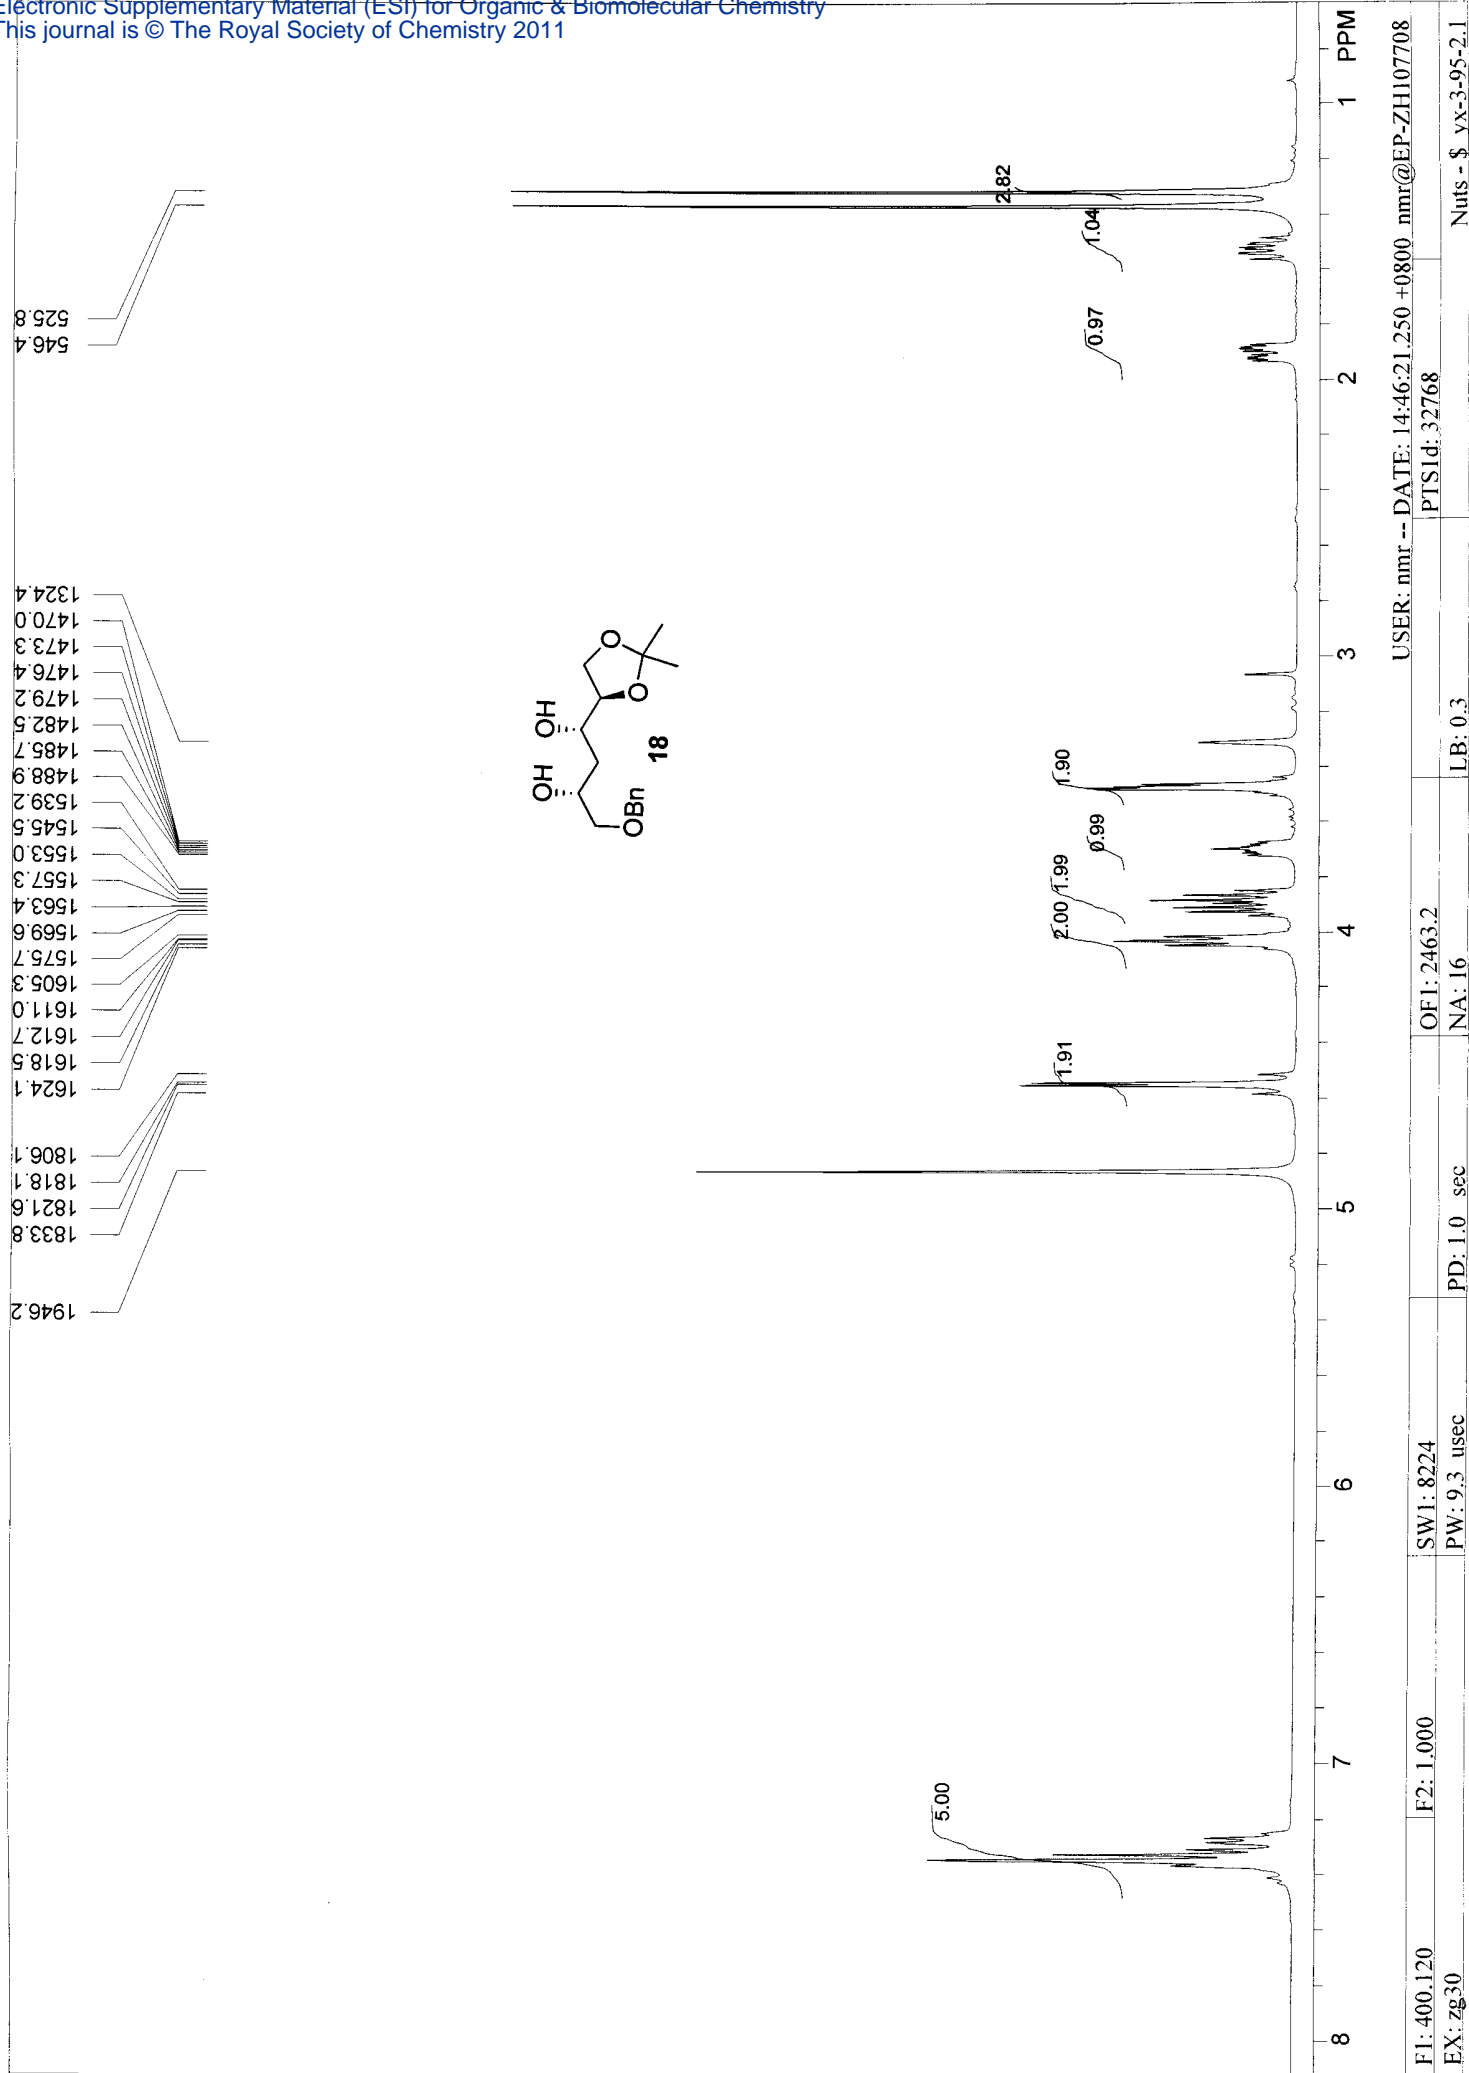

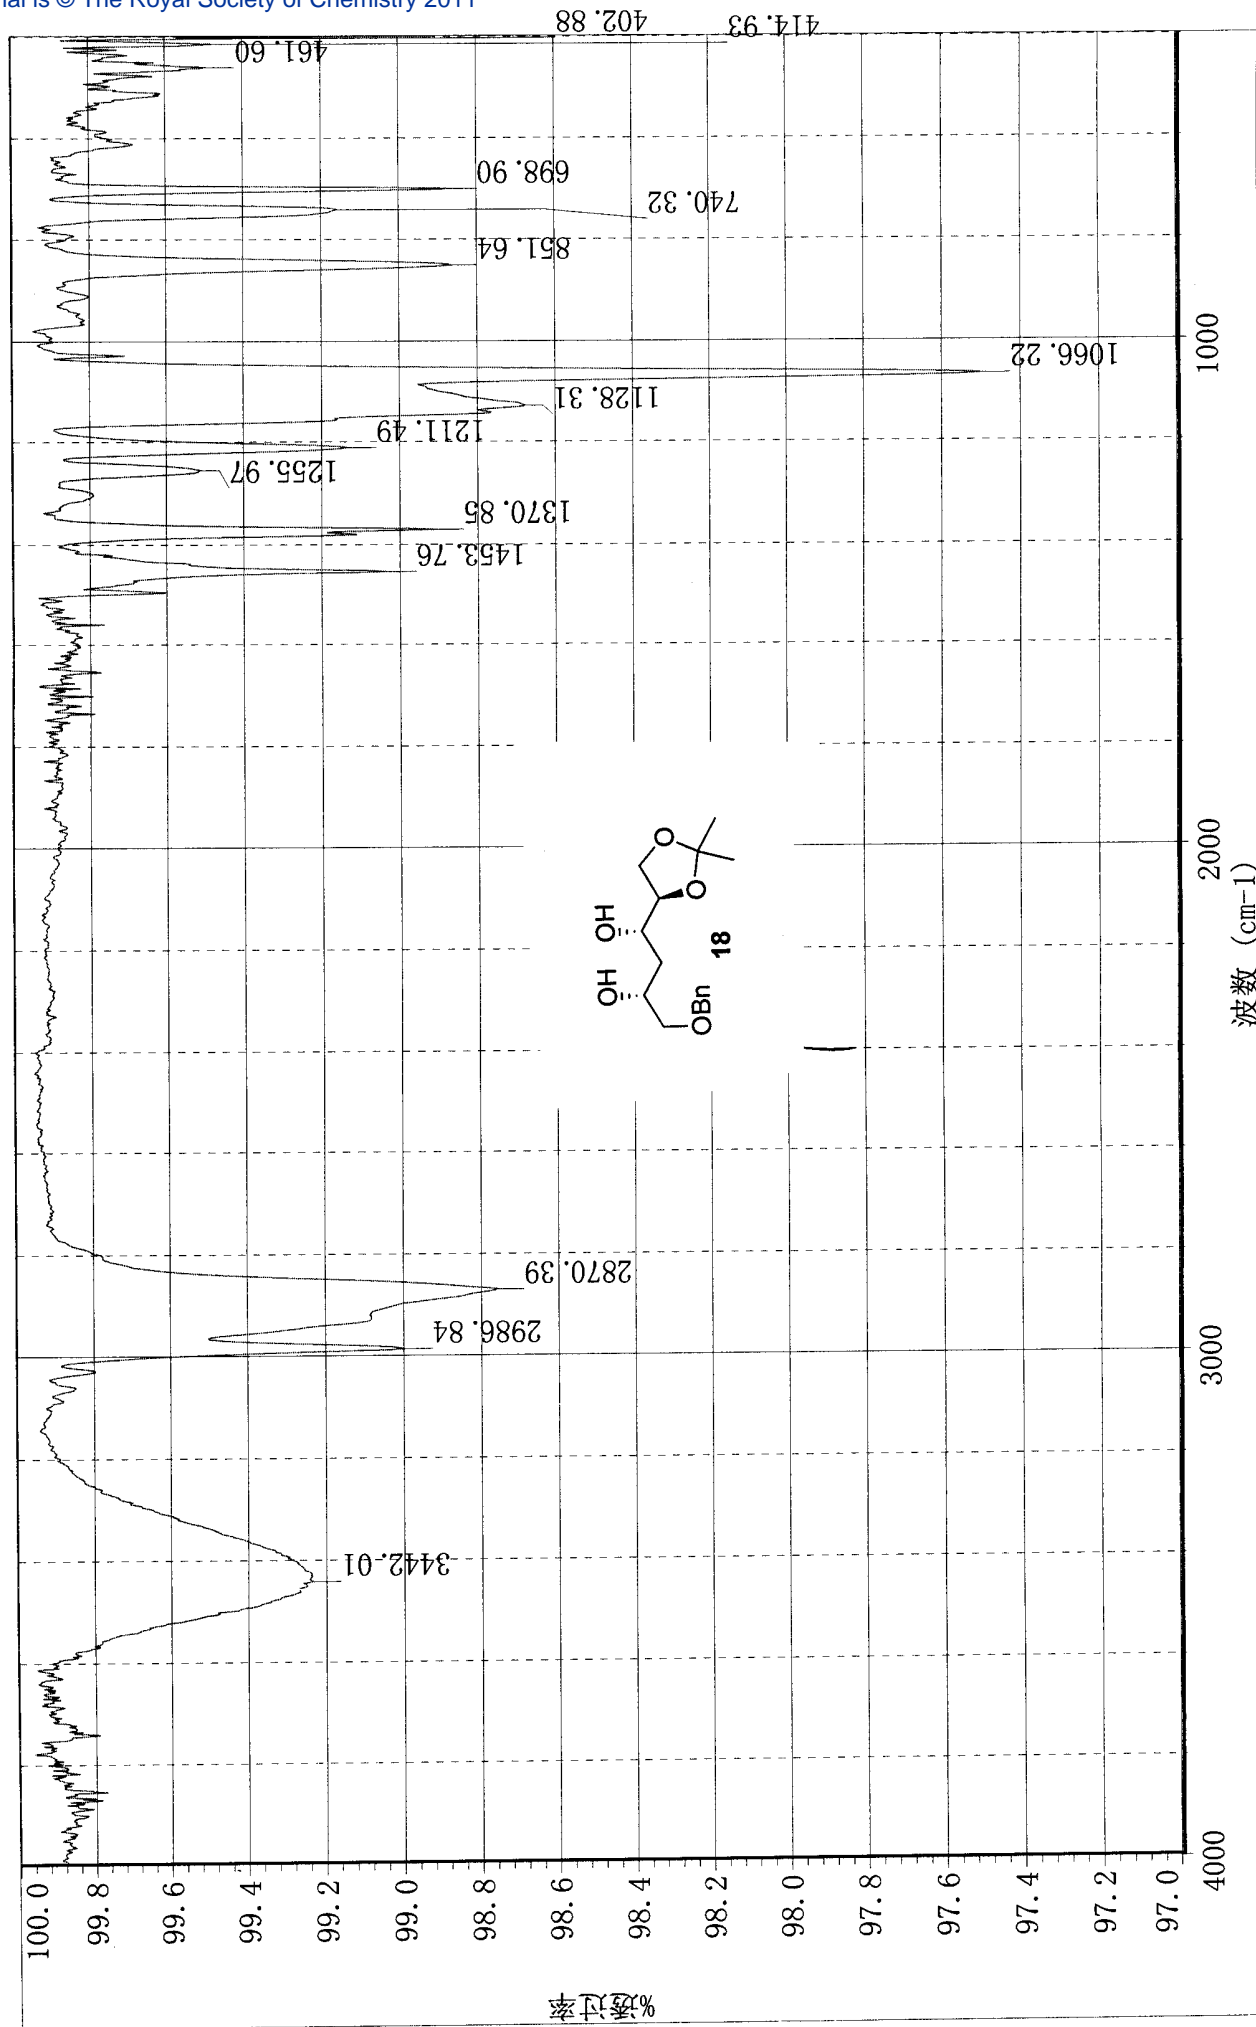

\*\*星期五 5月 13 15:52:51 2011

采集时间: 星期五 5月 13 15:53:32 2011 (GMT+08:00)

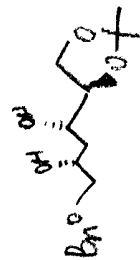

上海有机所生命有机化学国家重点实验室

20.932  
21.058  
25.011  
26.188  
31.554

65.825  
69.880  
70.208  
70.552  
73.067  
76.626  
76.683  
77.000  
77.318

109.650

127.540  
127.612  
128.285

137.786

170.182  
170.195

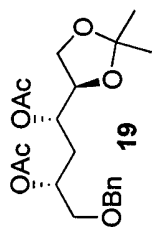

S 52

100 MHz, CDCl<sub>3</sub>

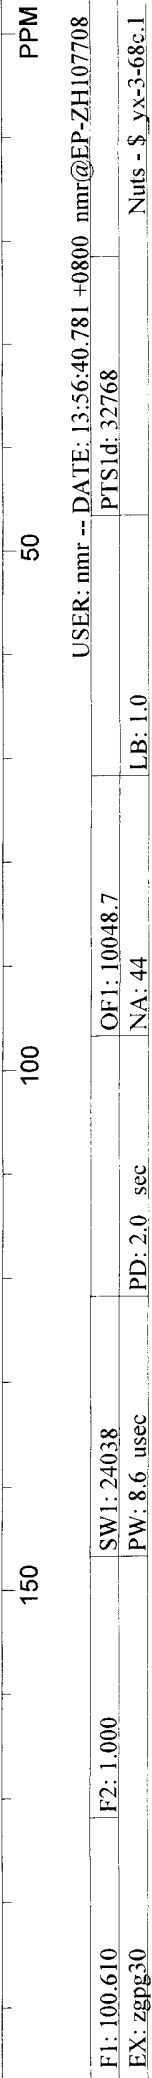

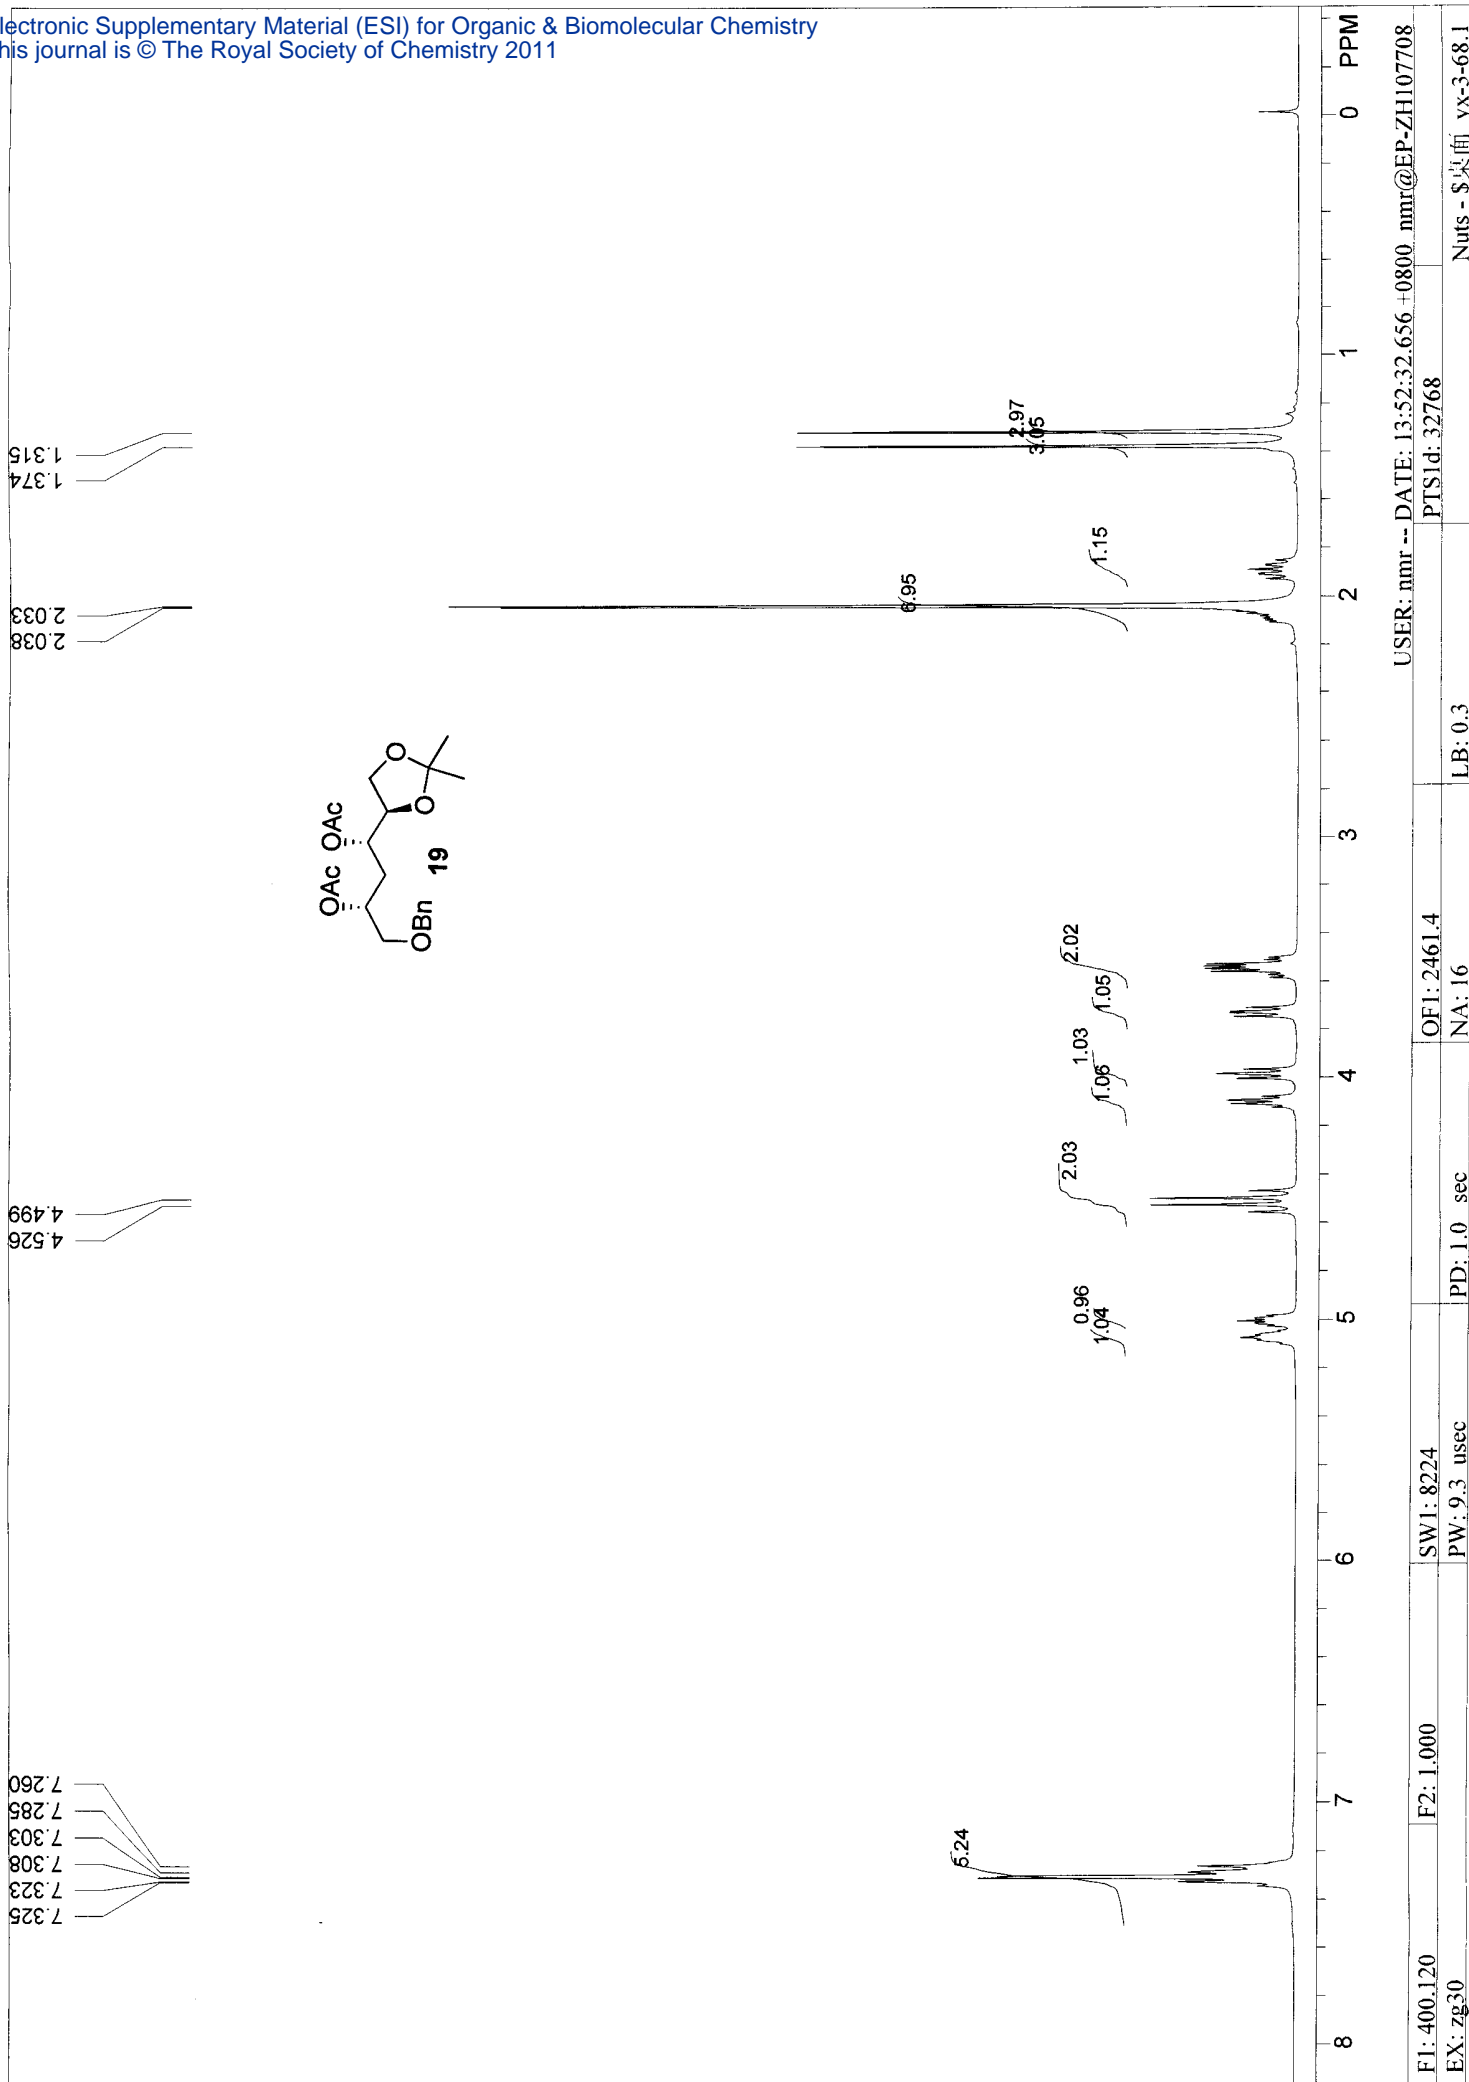

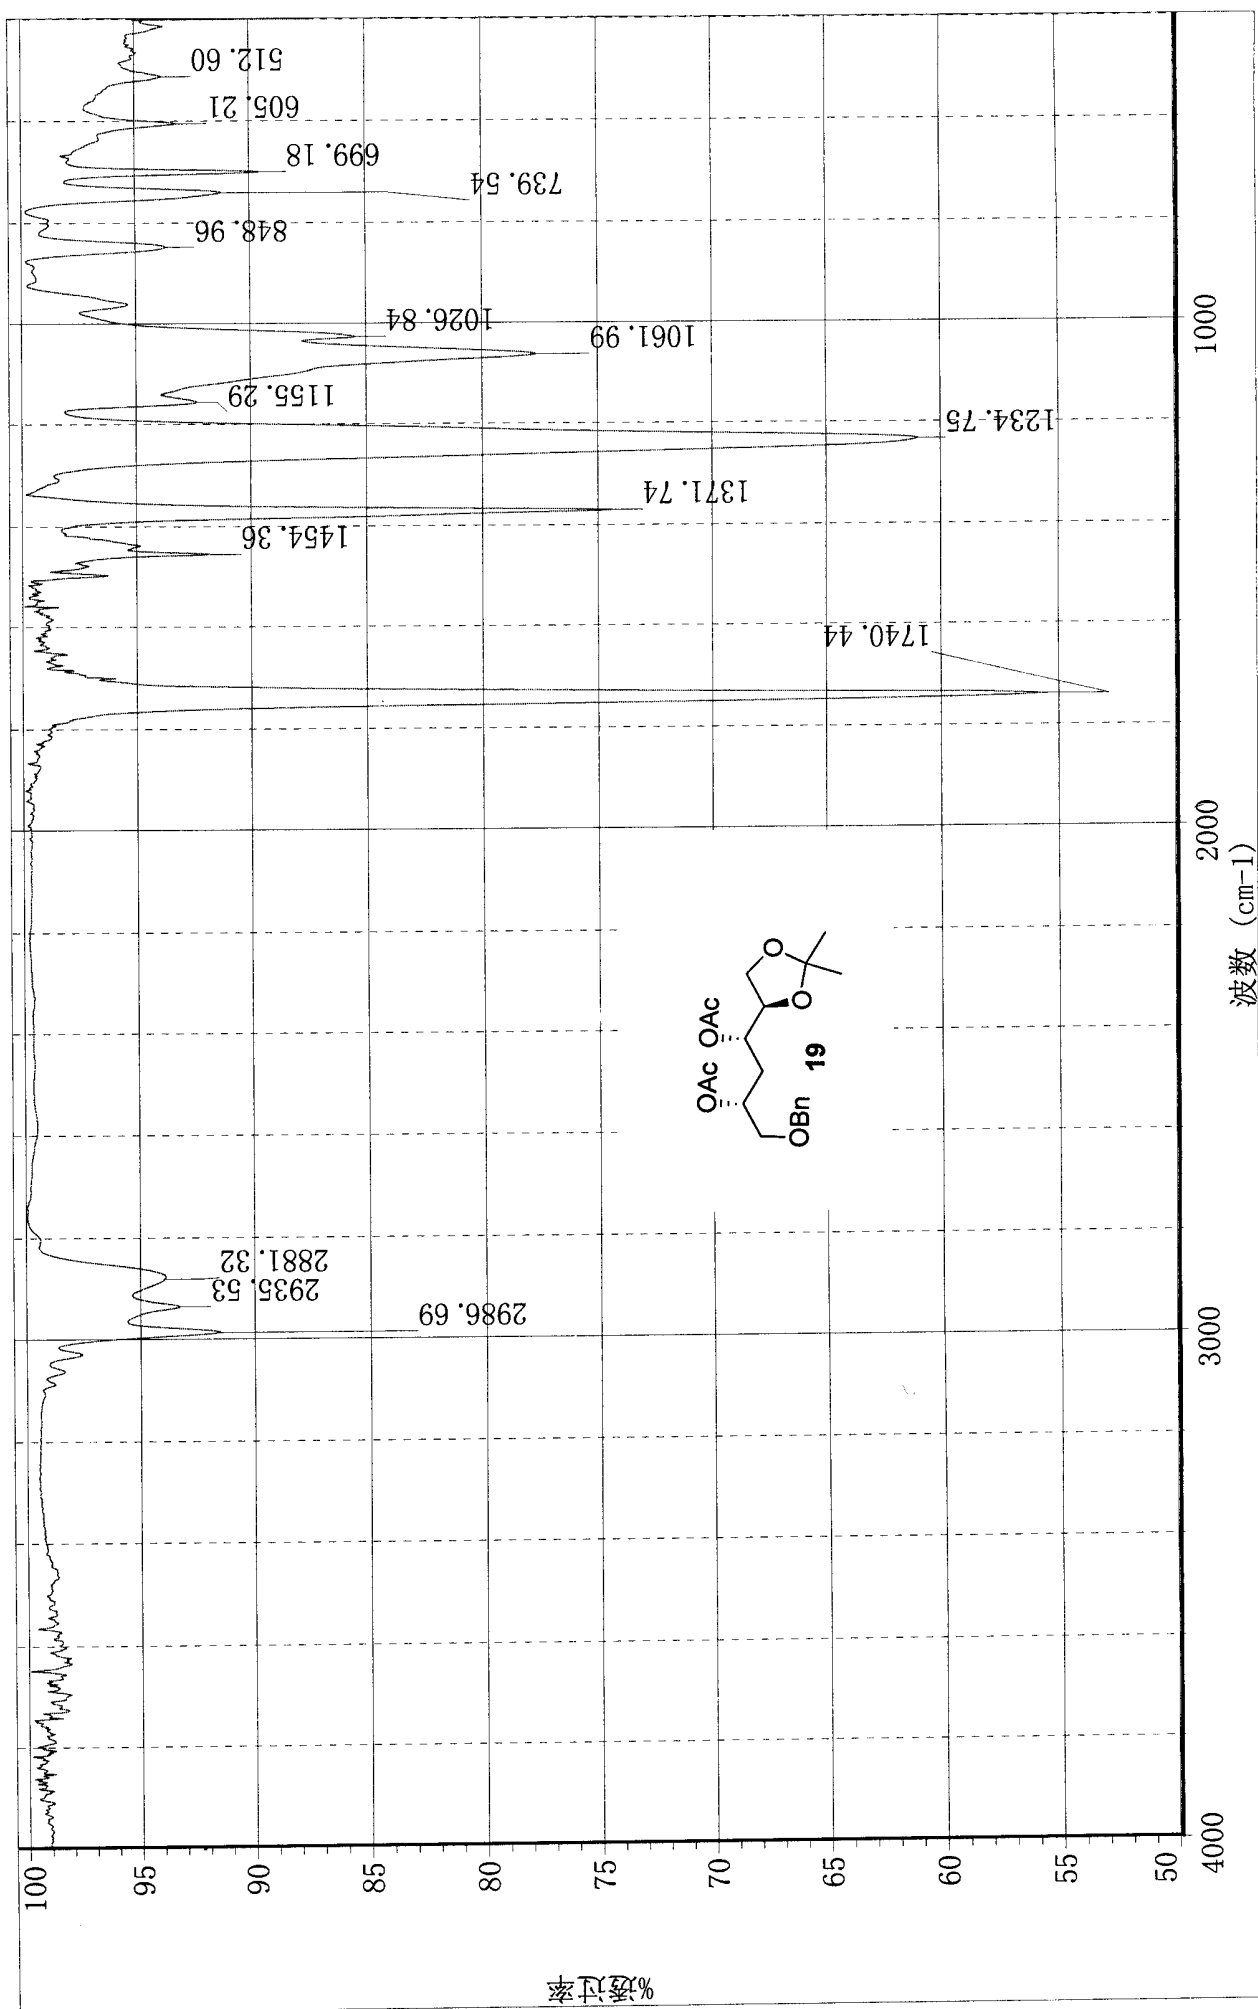

\*\*yx-4-7

采集时间: 星期五 5月 13 16:02:27 2011 (GMT+08:00)

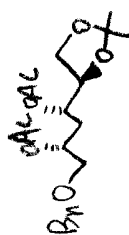

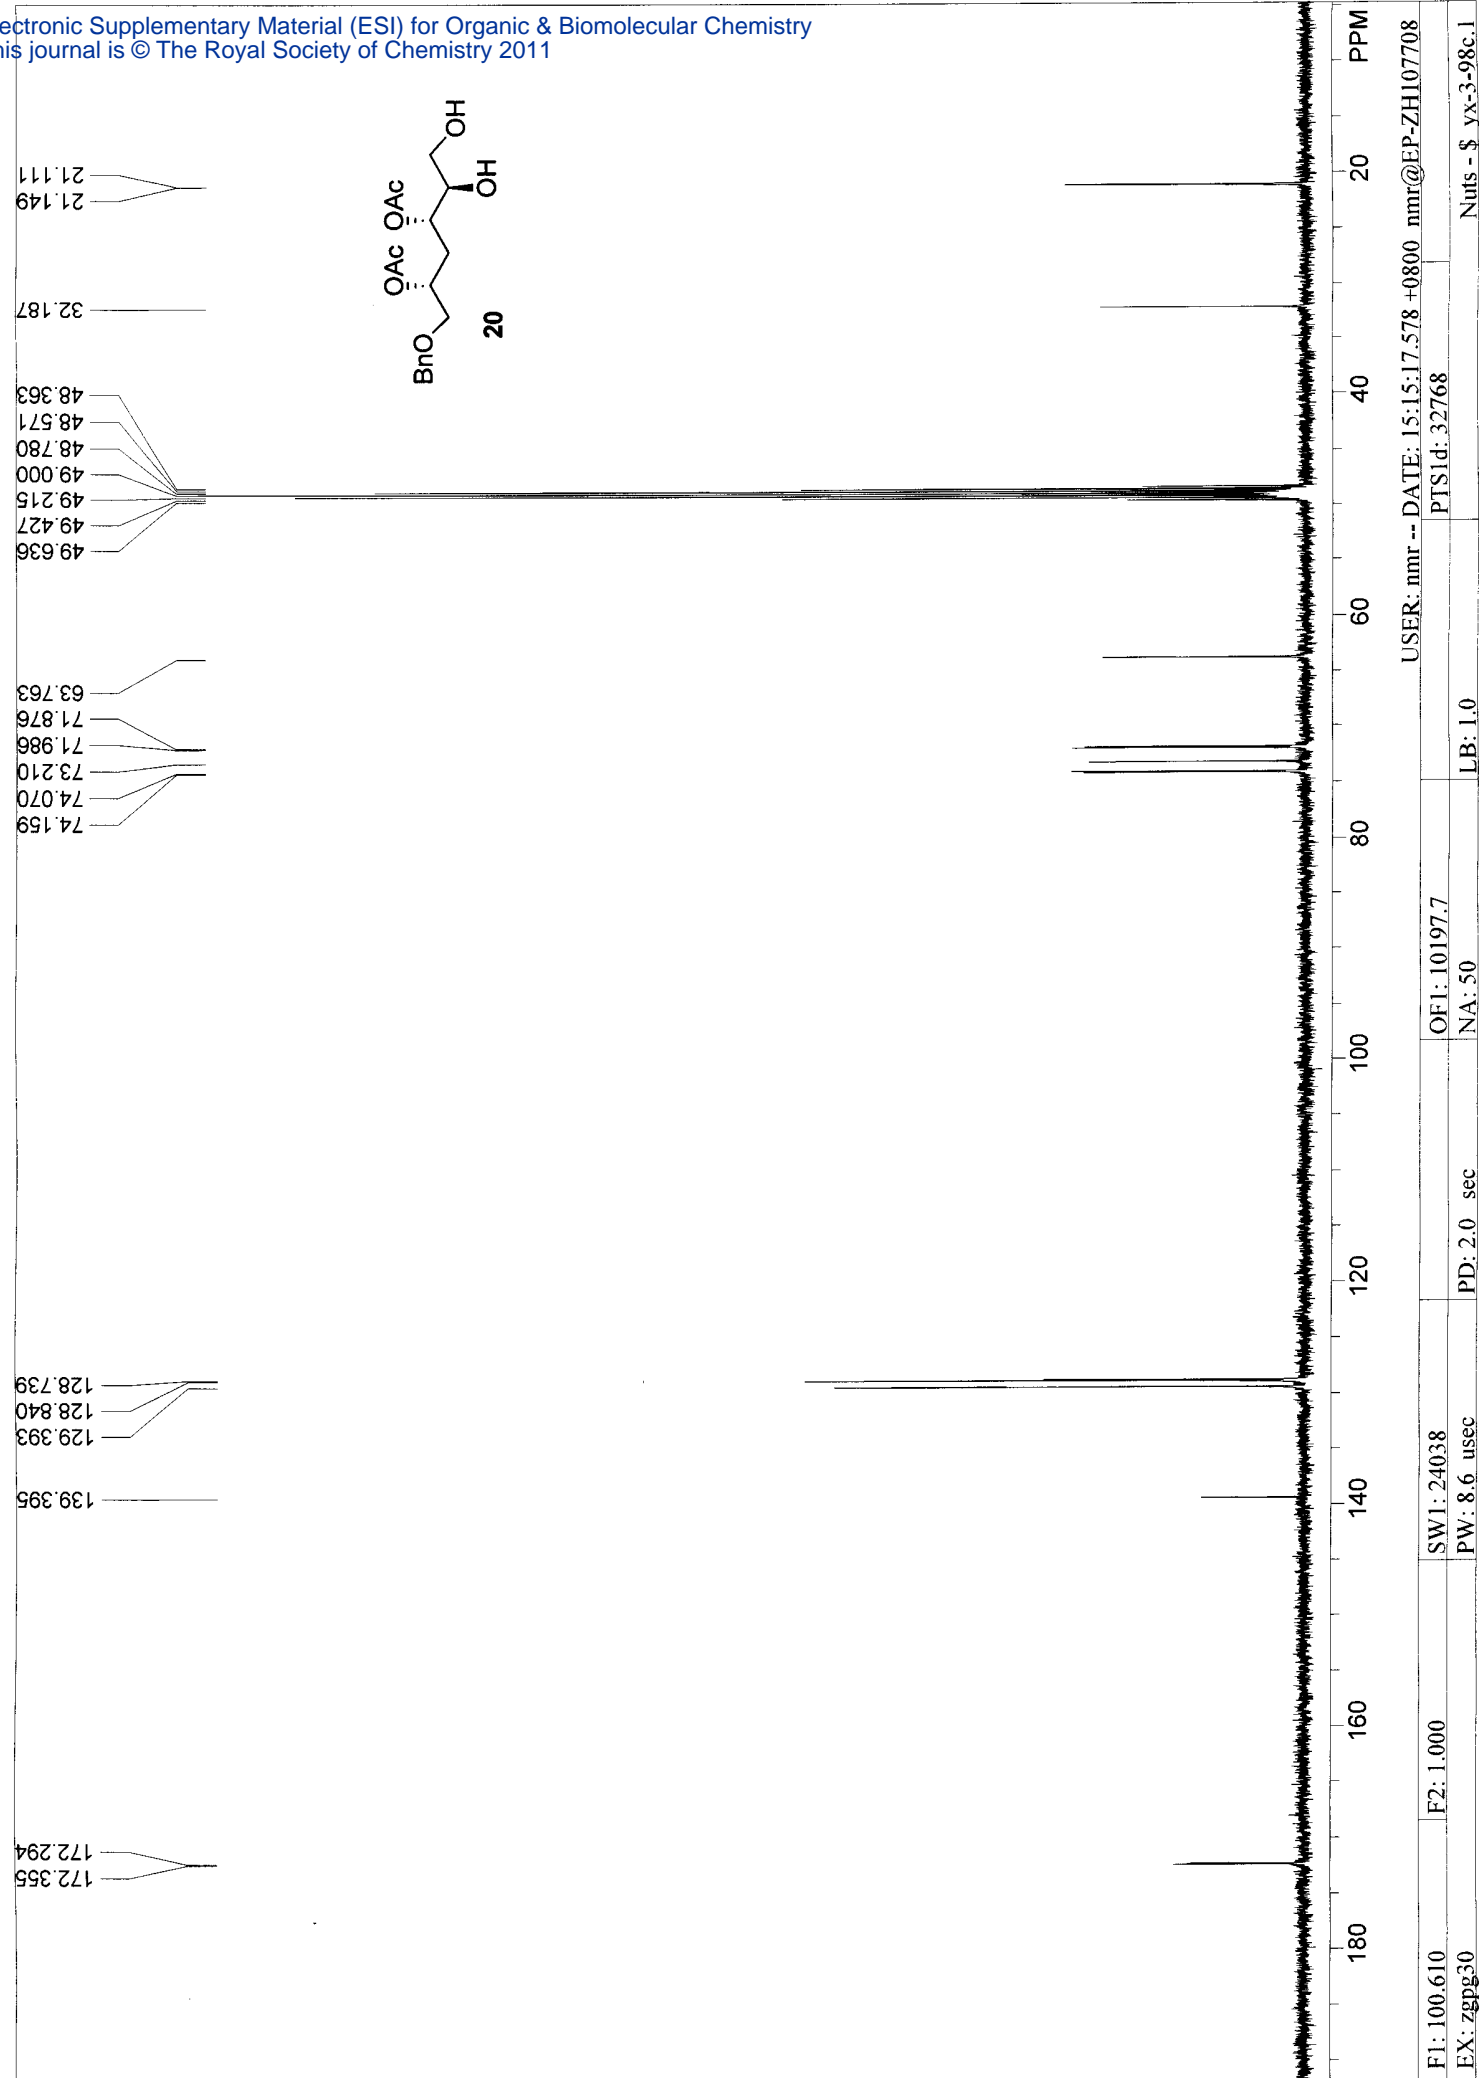

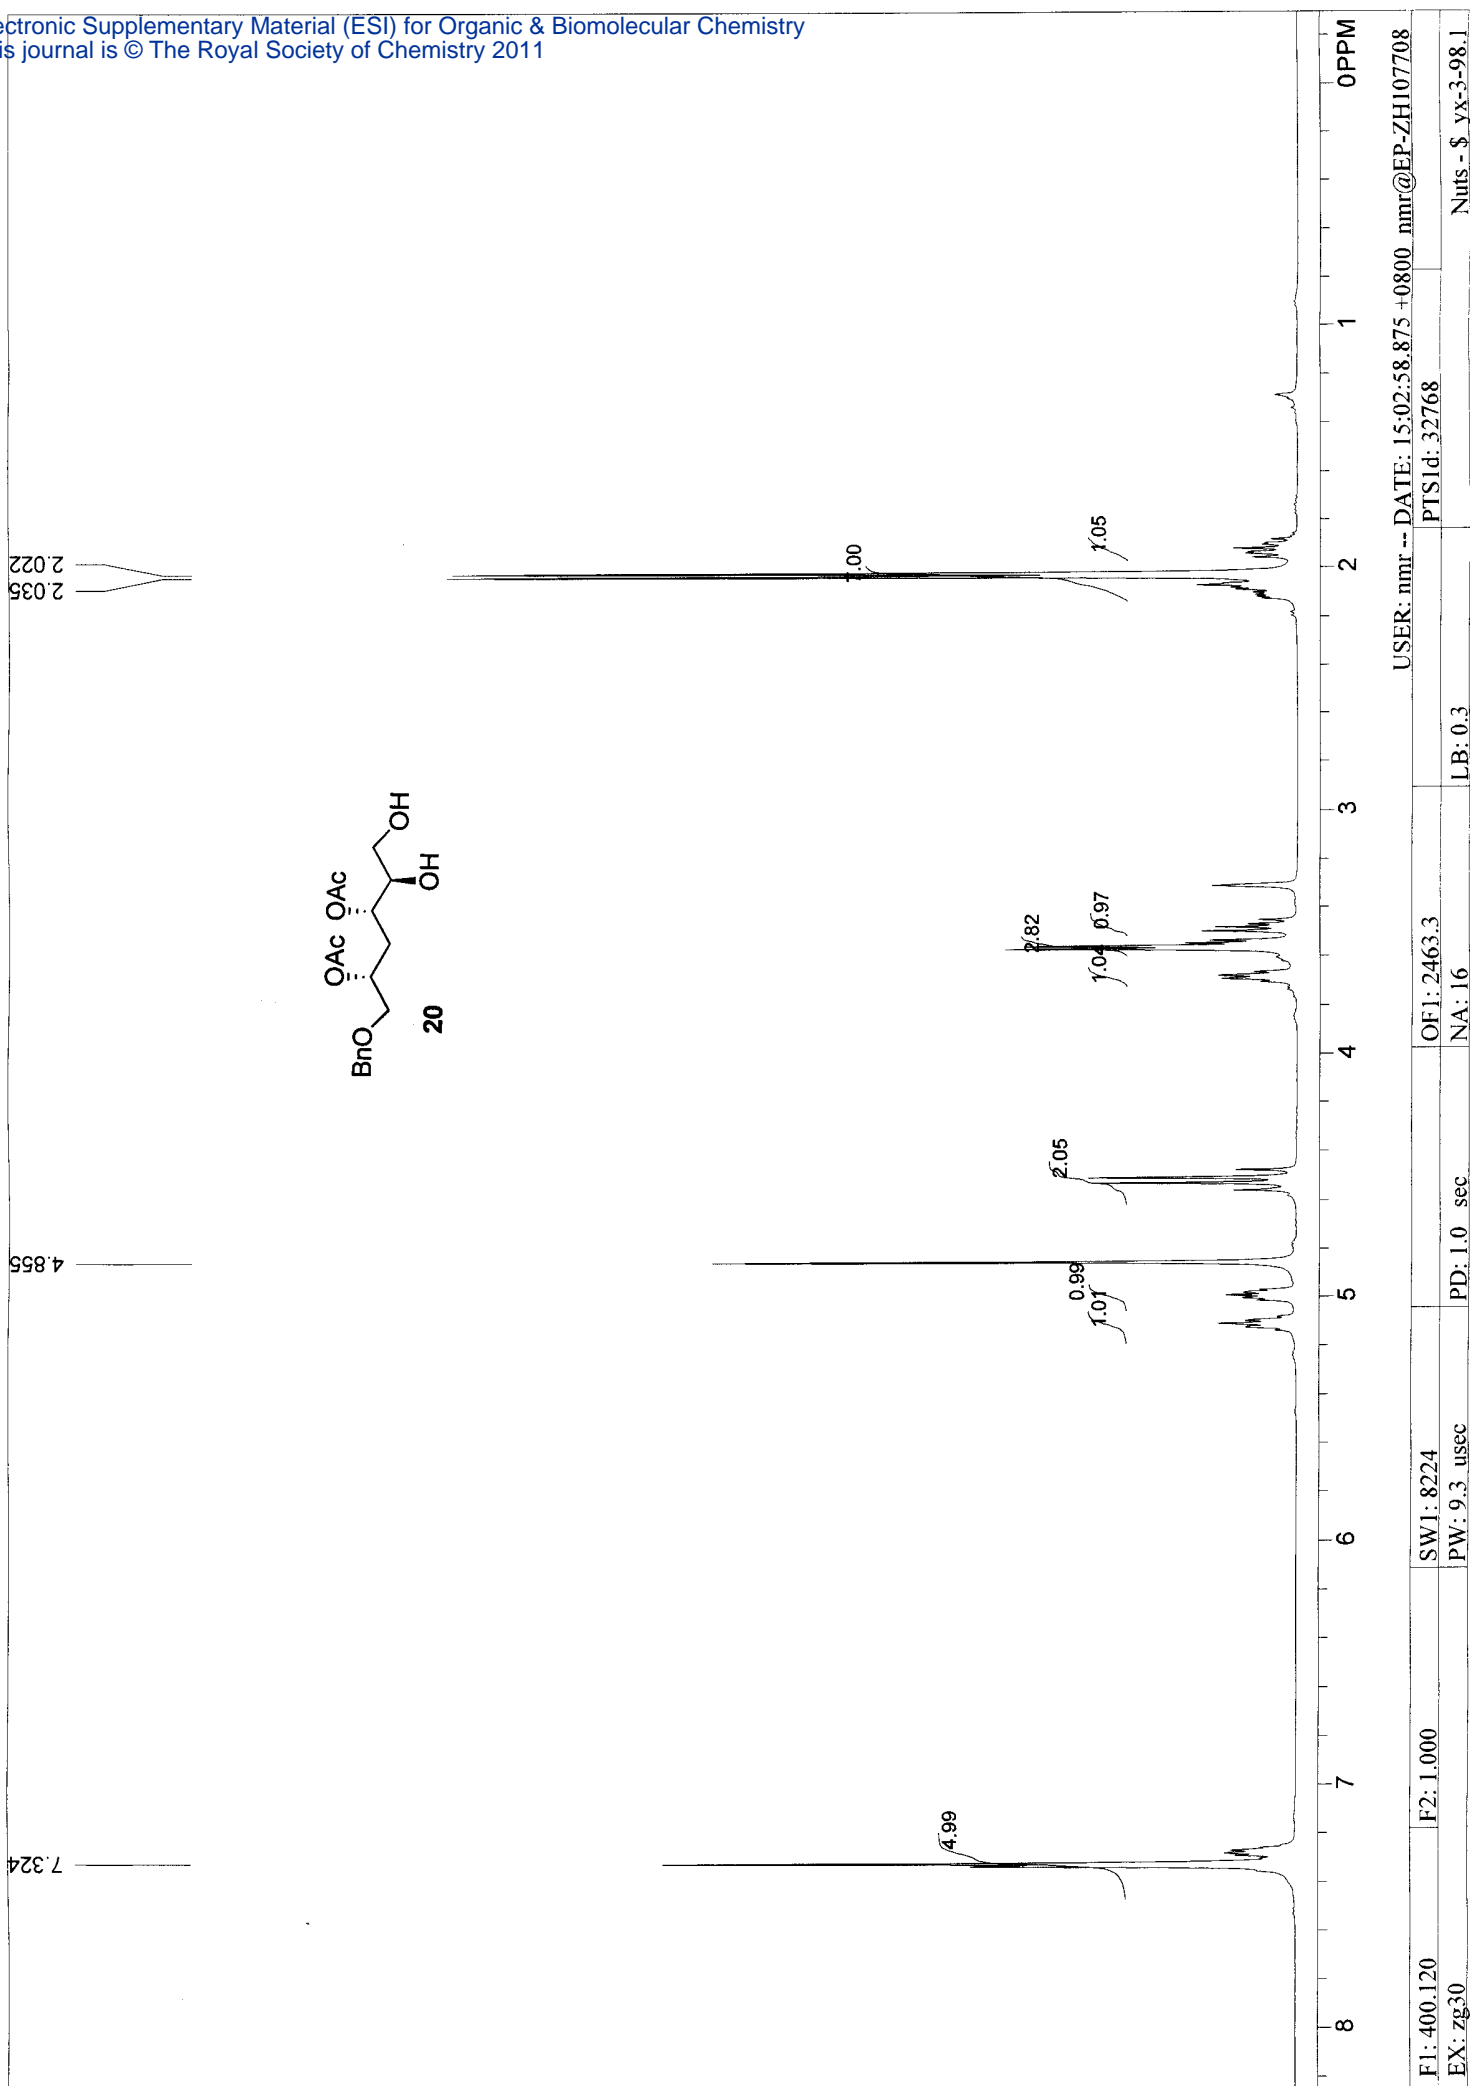



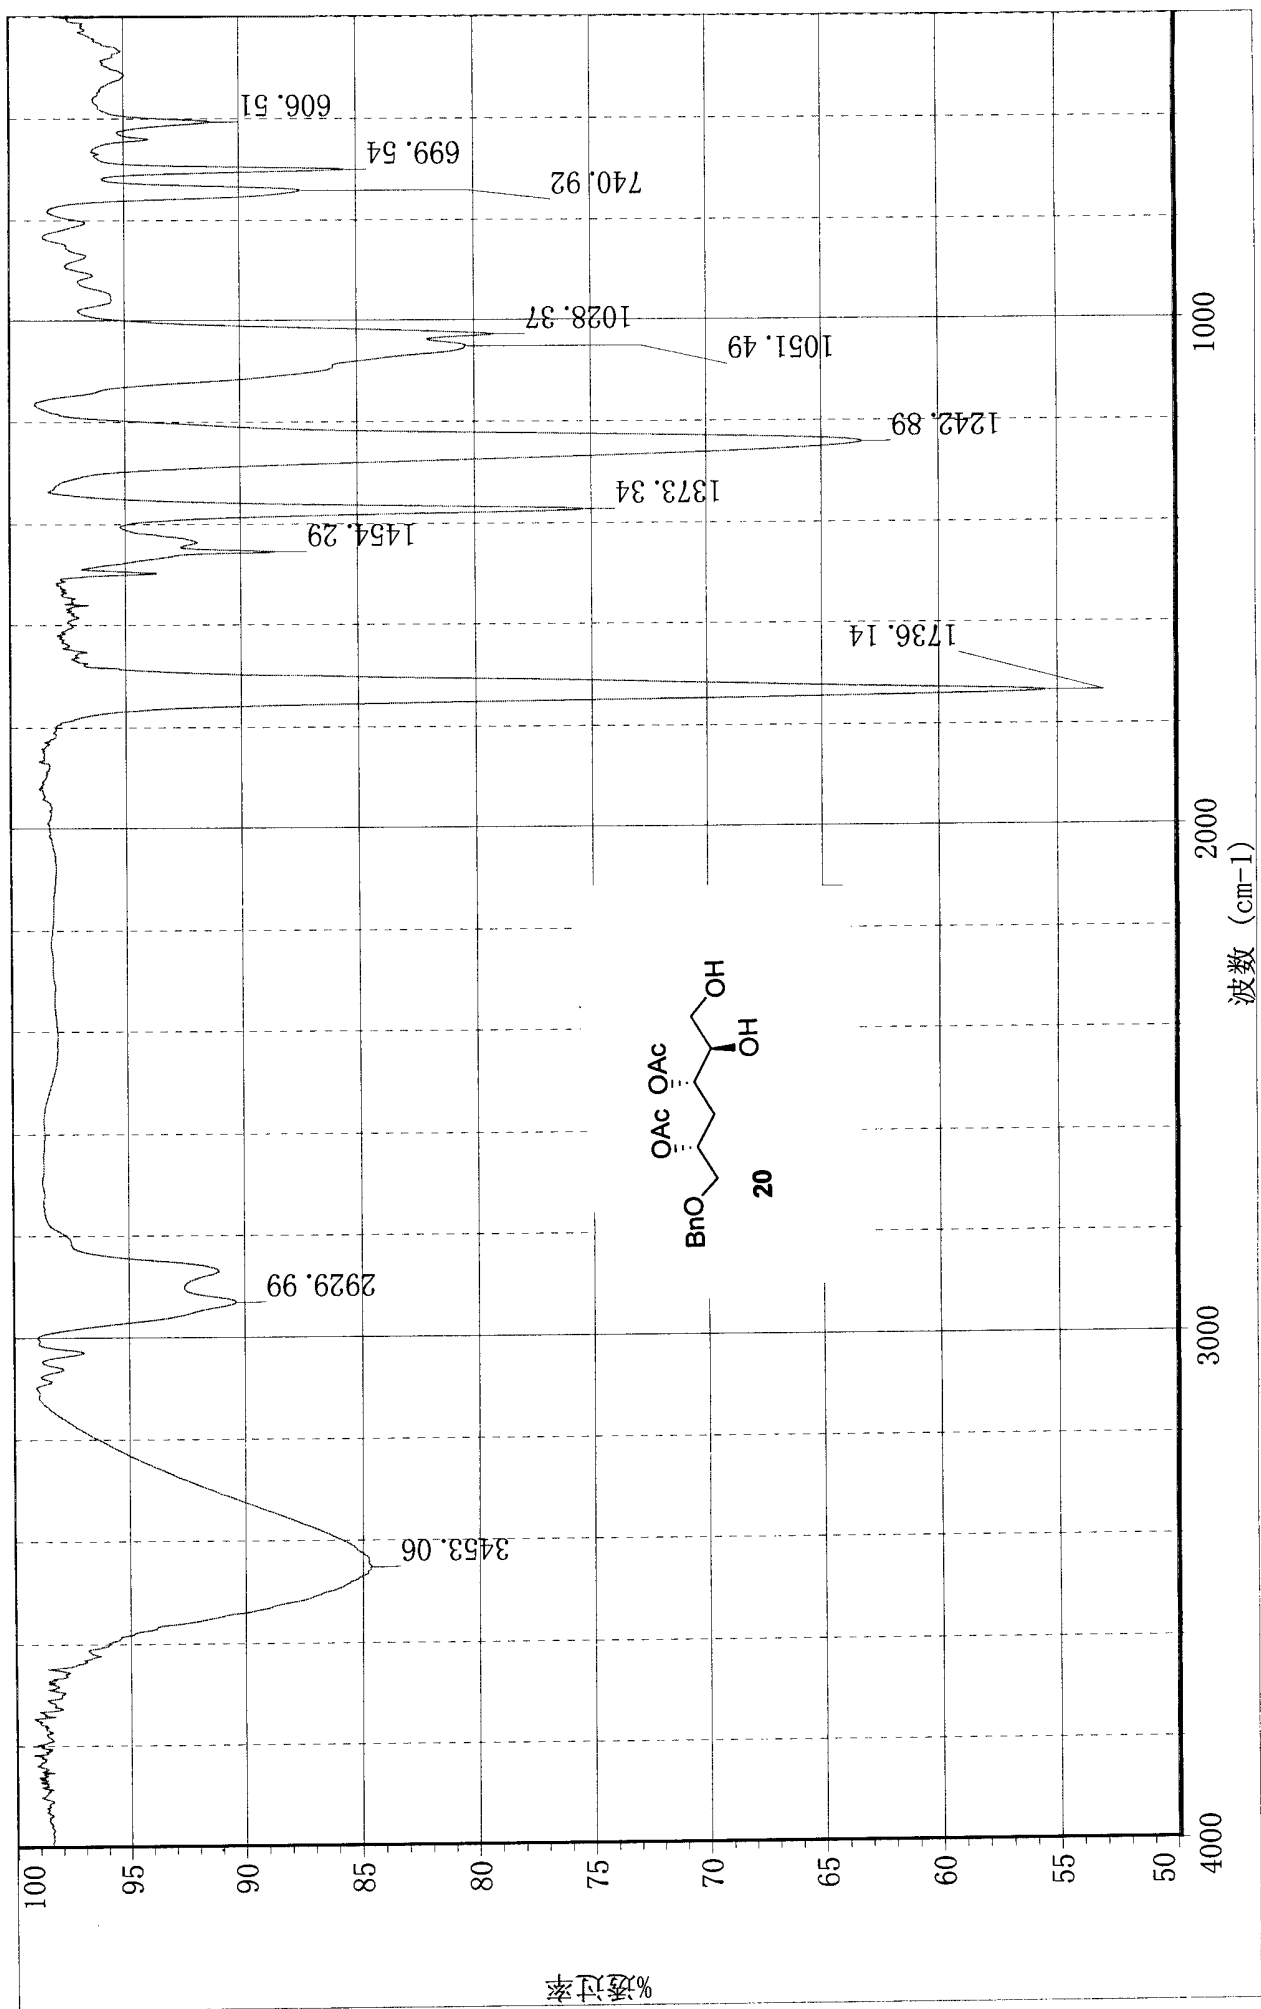

\*yx-3-98

采集时间: 星期五 5月 13 16:11:38 2011 (GMT+08:00)

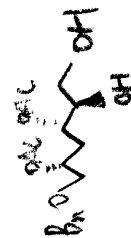

上海有机所生命有机化学国家重点实验室

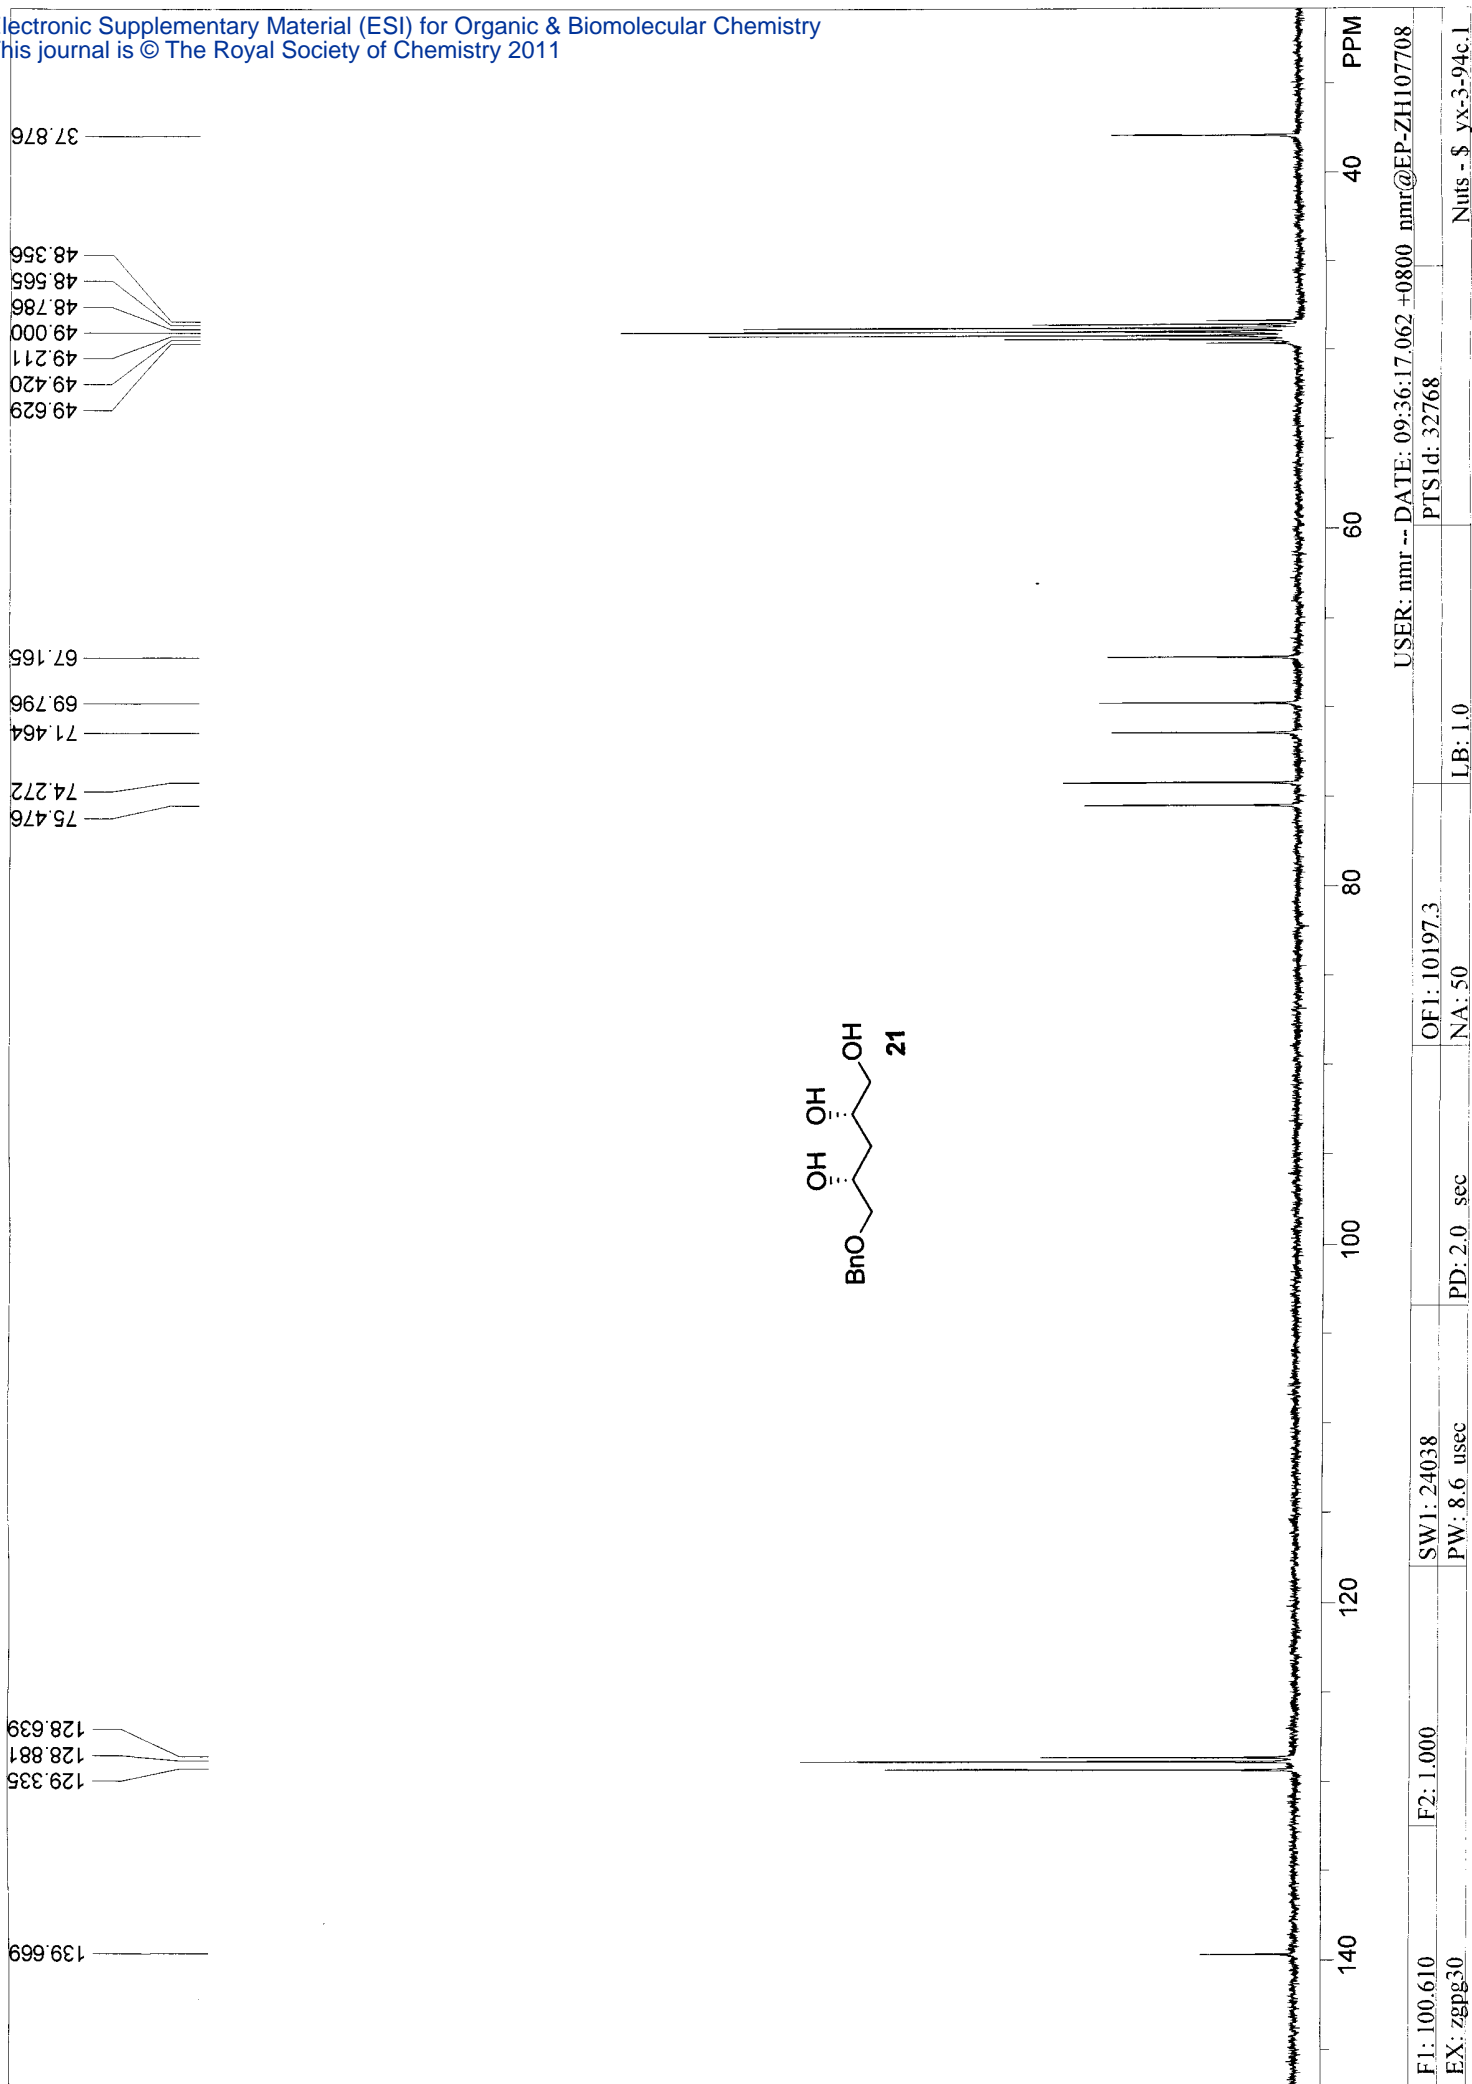

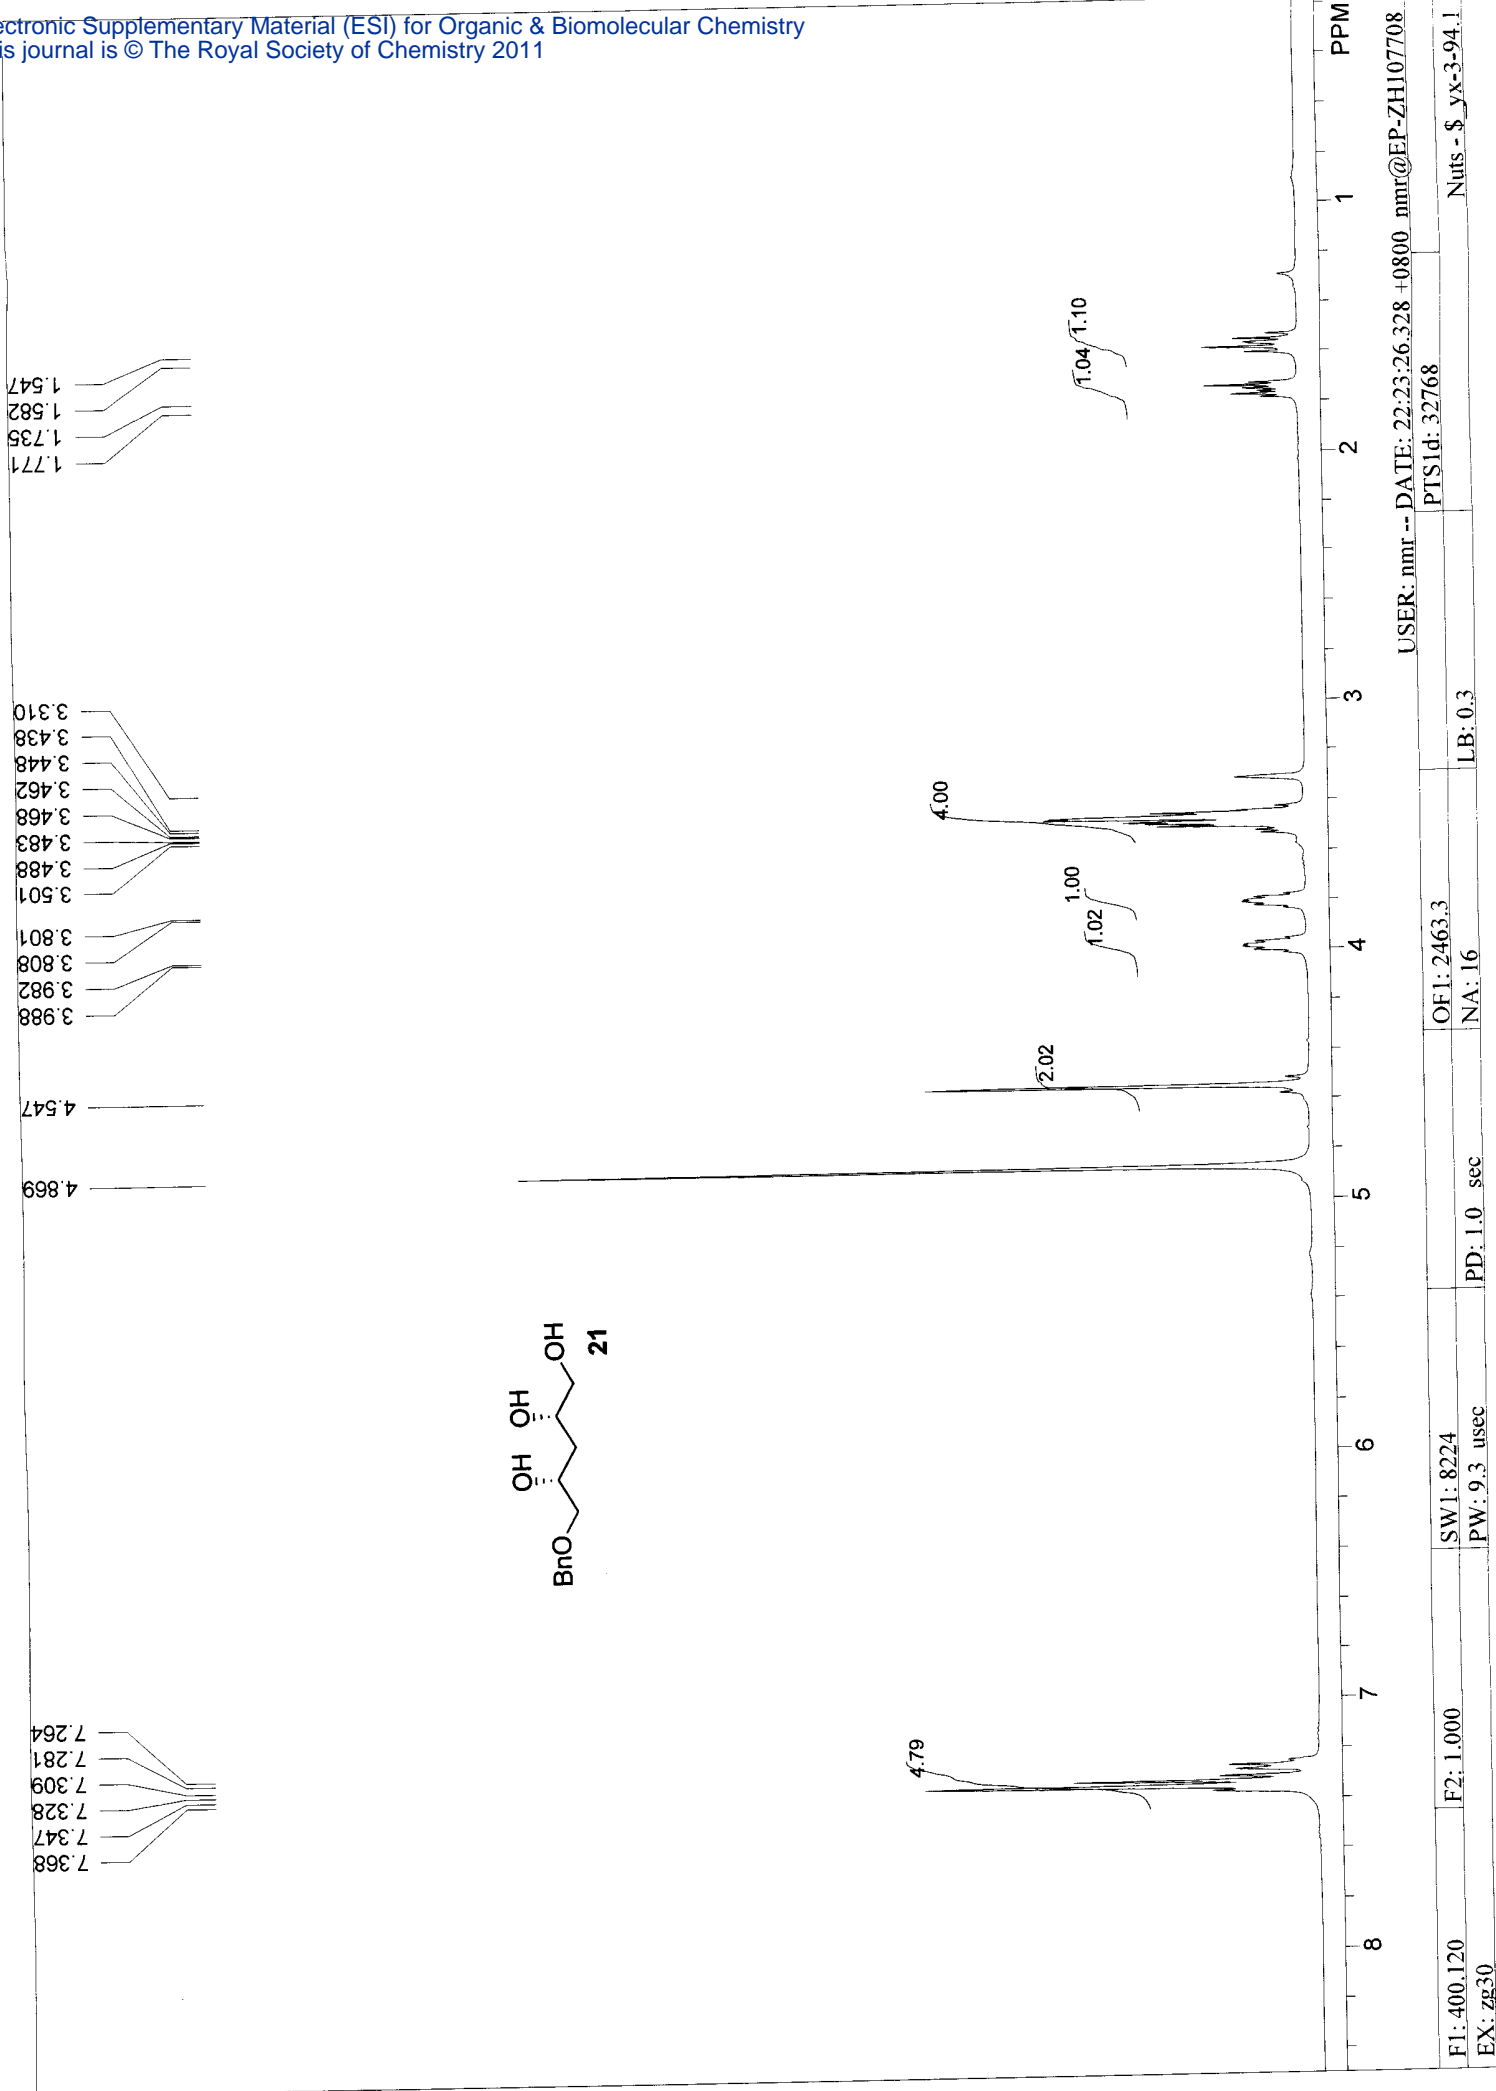

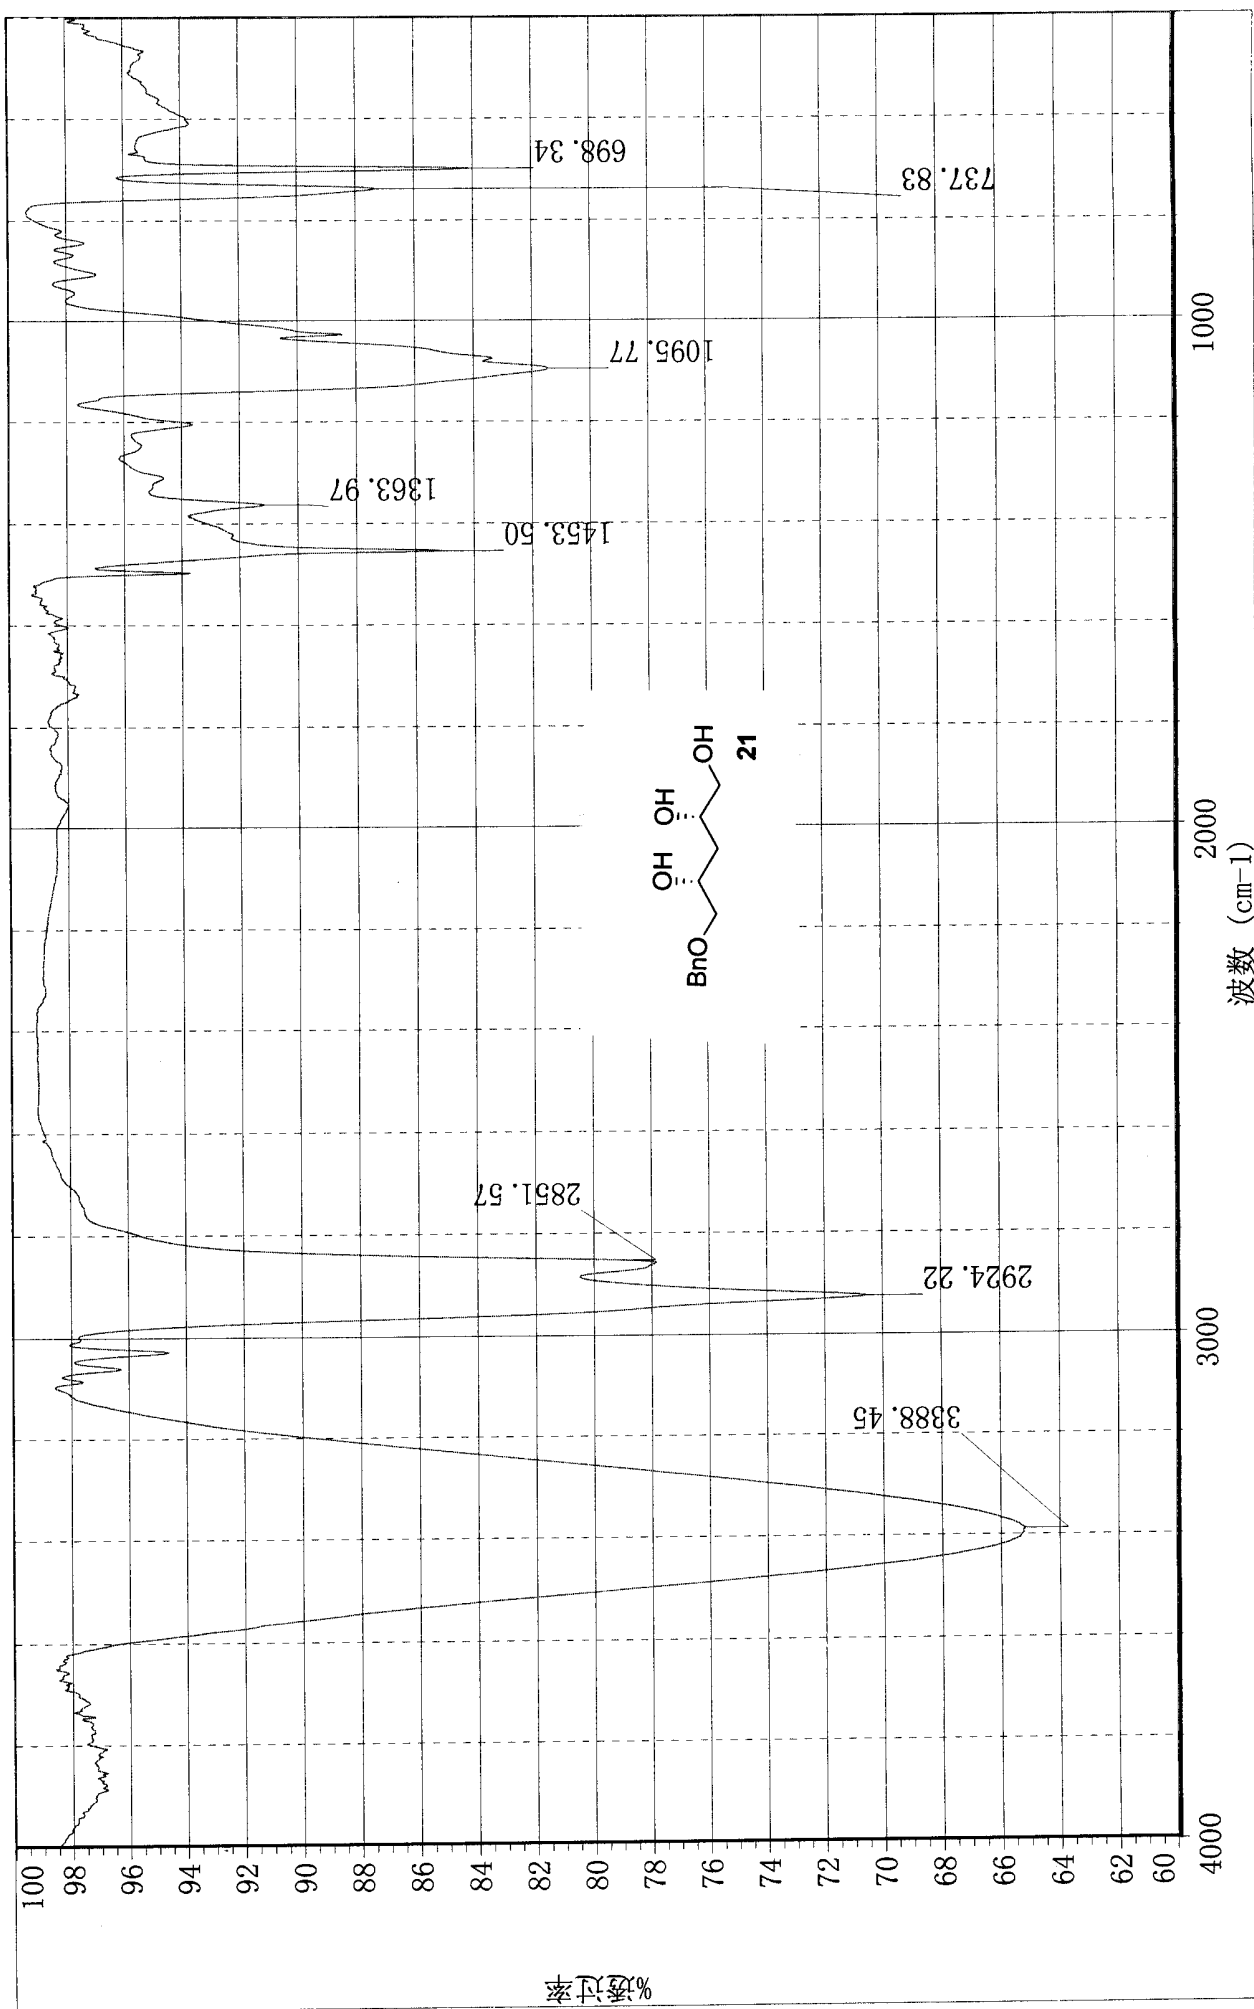

\*\*星期五 5月 13 16:48:48 2011  
采集时间: 星期五 5月 13 16:49:29 2011 (GMT+08:00)

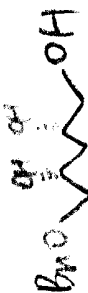

上海有机所生命有机化学国家重点实验室

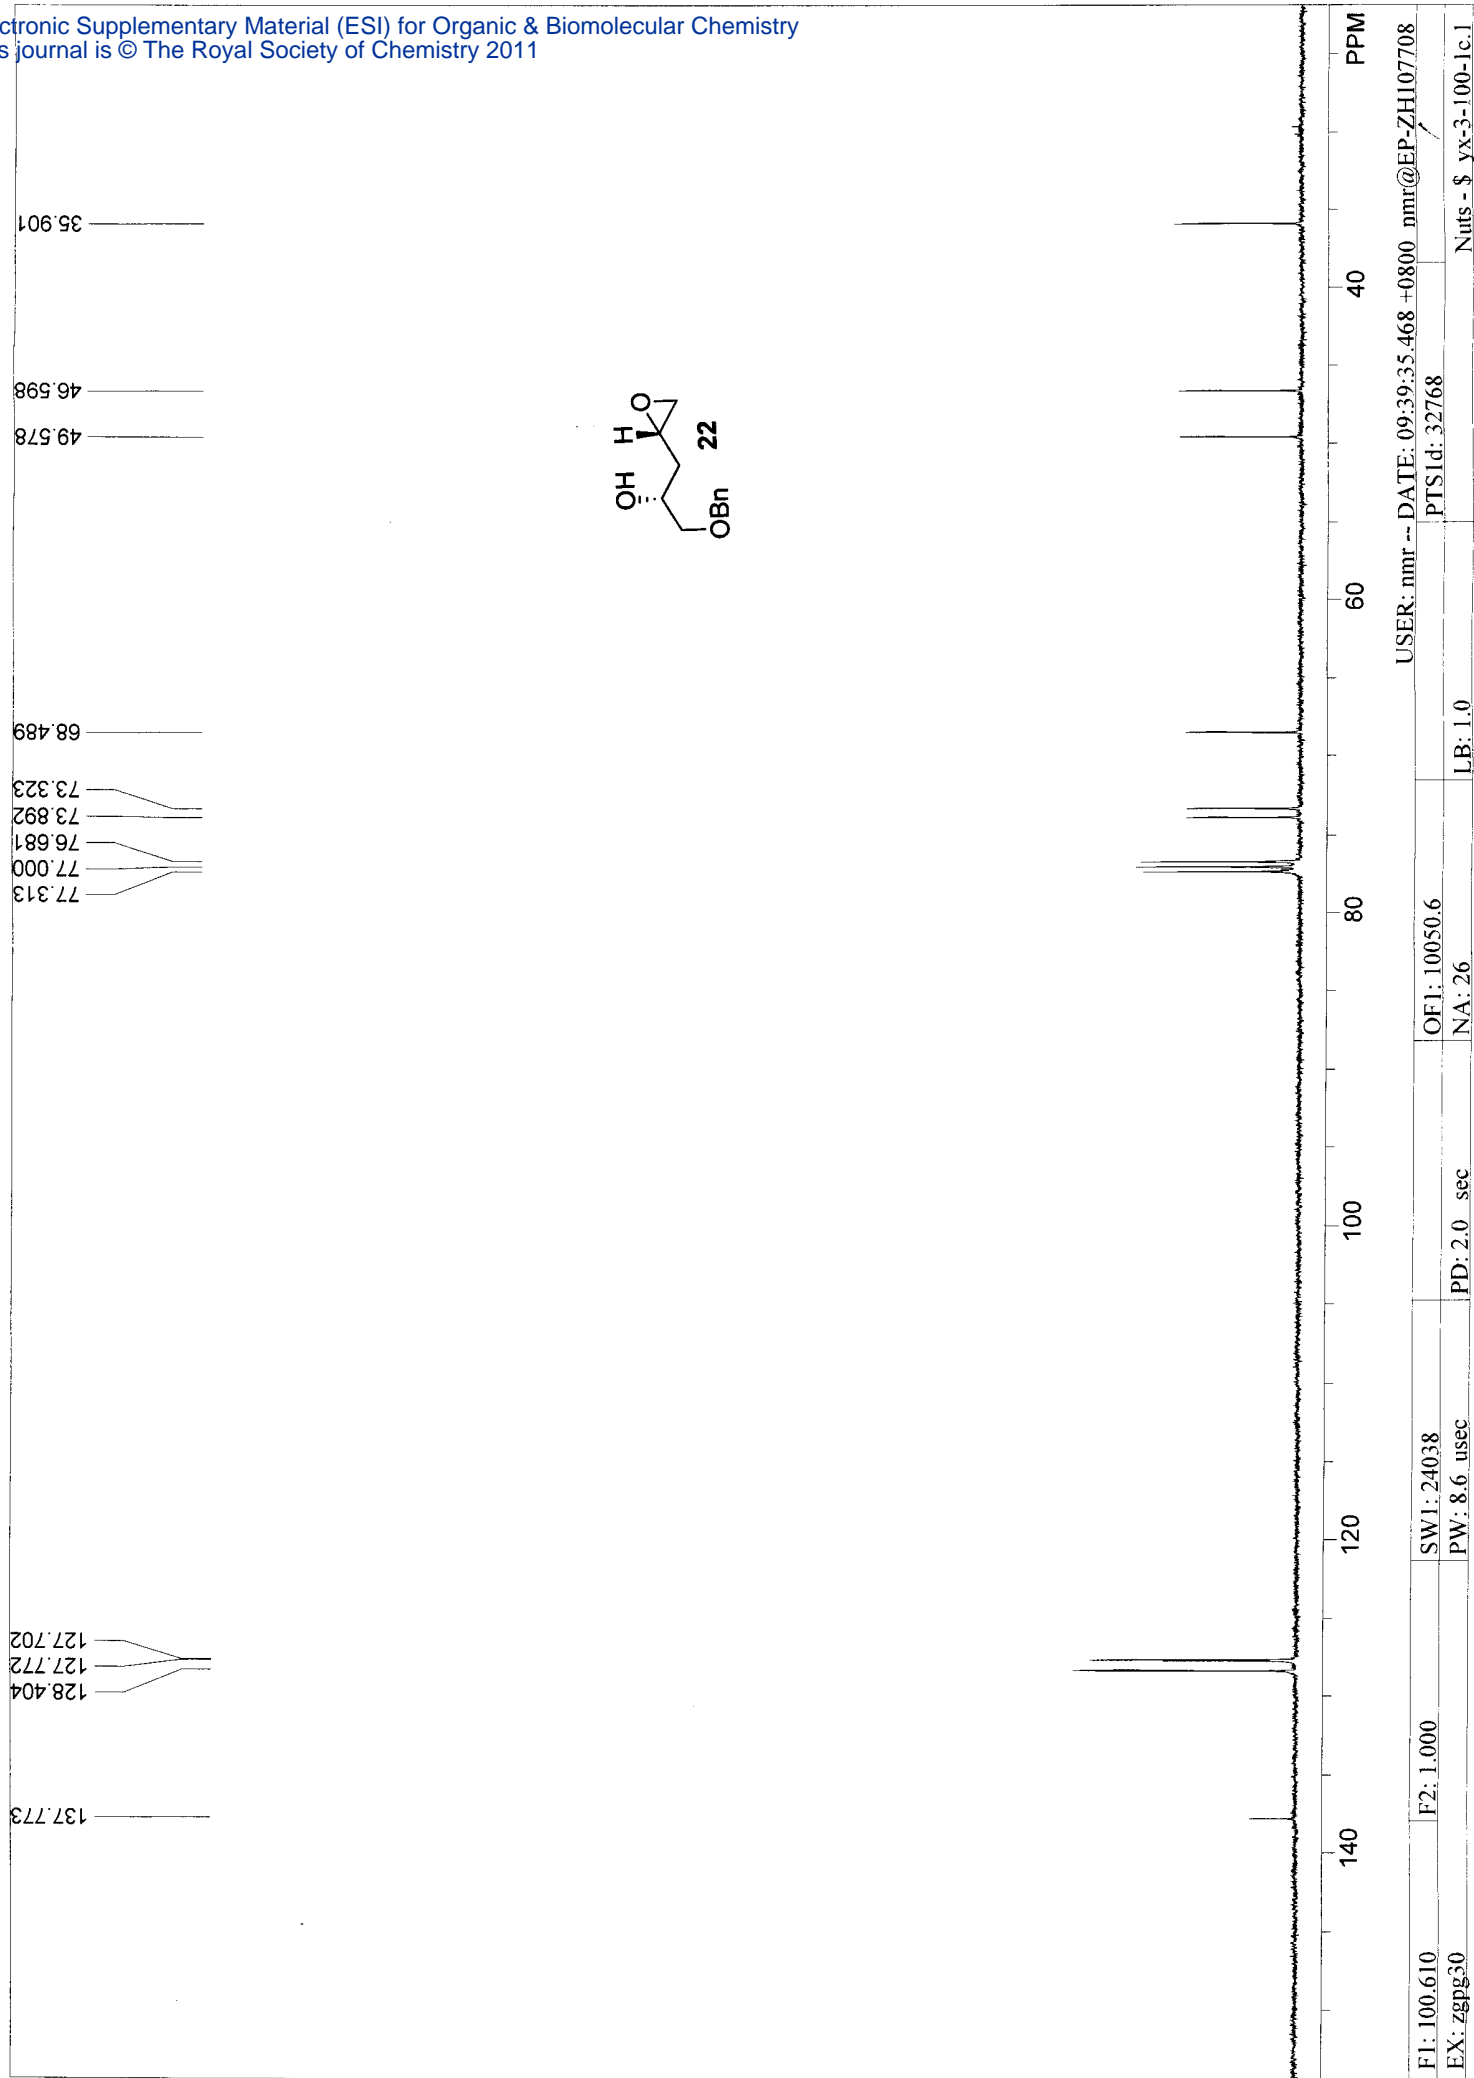

S 61

100 MHz, CDCl<sub>3</sub>

4.561

7.338

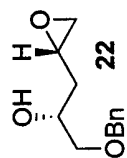

4.85

1.89

0.94

1.95

0.90

0.98

0.86

0.91

1.11

1.00

7

6

5

4

3

2

1

0

PPM

F1: 400.120

F2: 1.000

SW1: 8224

PW: 9.3 usec

PD: 1.0 sec

OF1: 2461.2

NA: 16

LB: 0.3

PTSID: 32768

USER: nmr -- DATE: 14:38:45.437 +0800 nmr@EP-ZH107708

Nuts - \$ \_yx-3-100-In.1

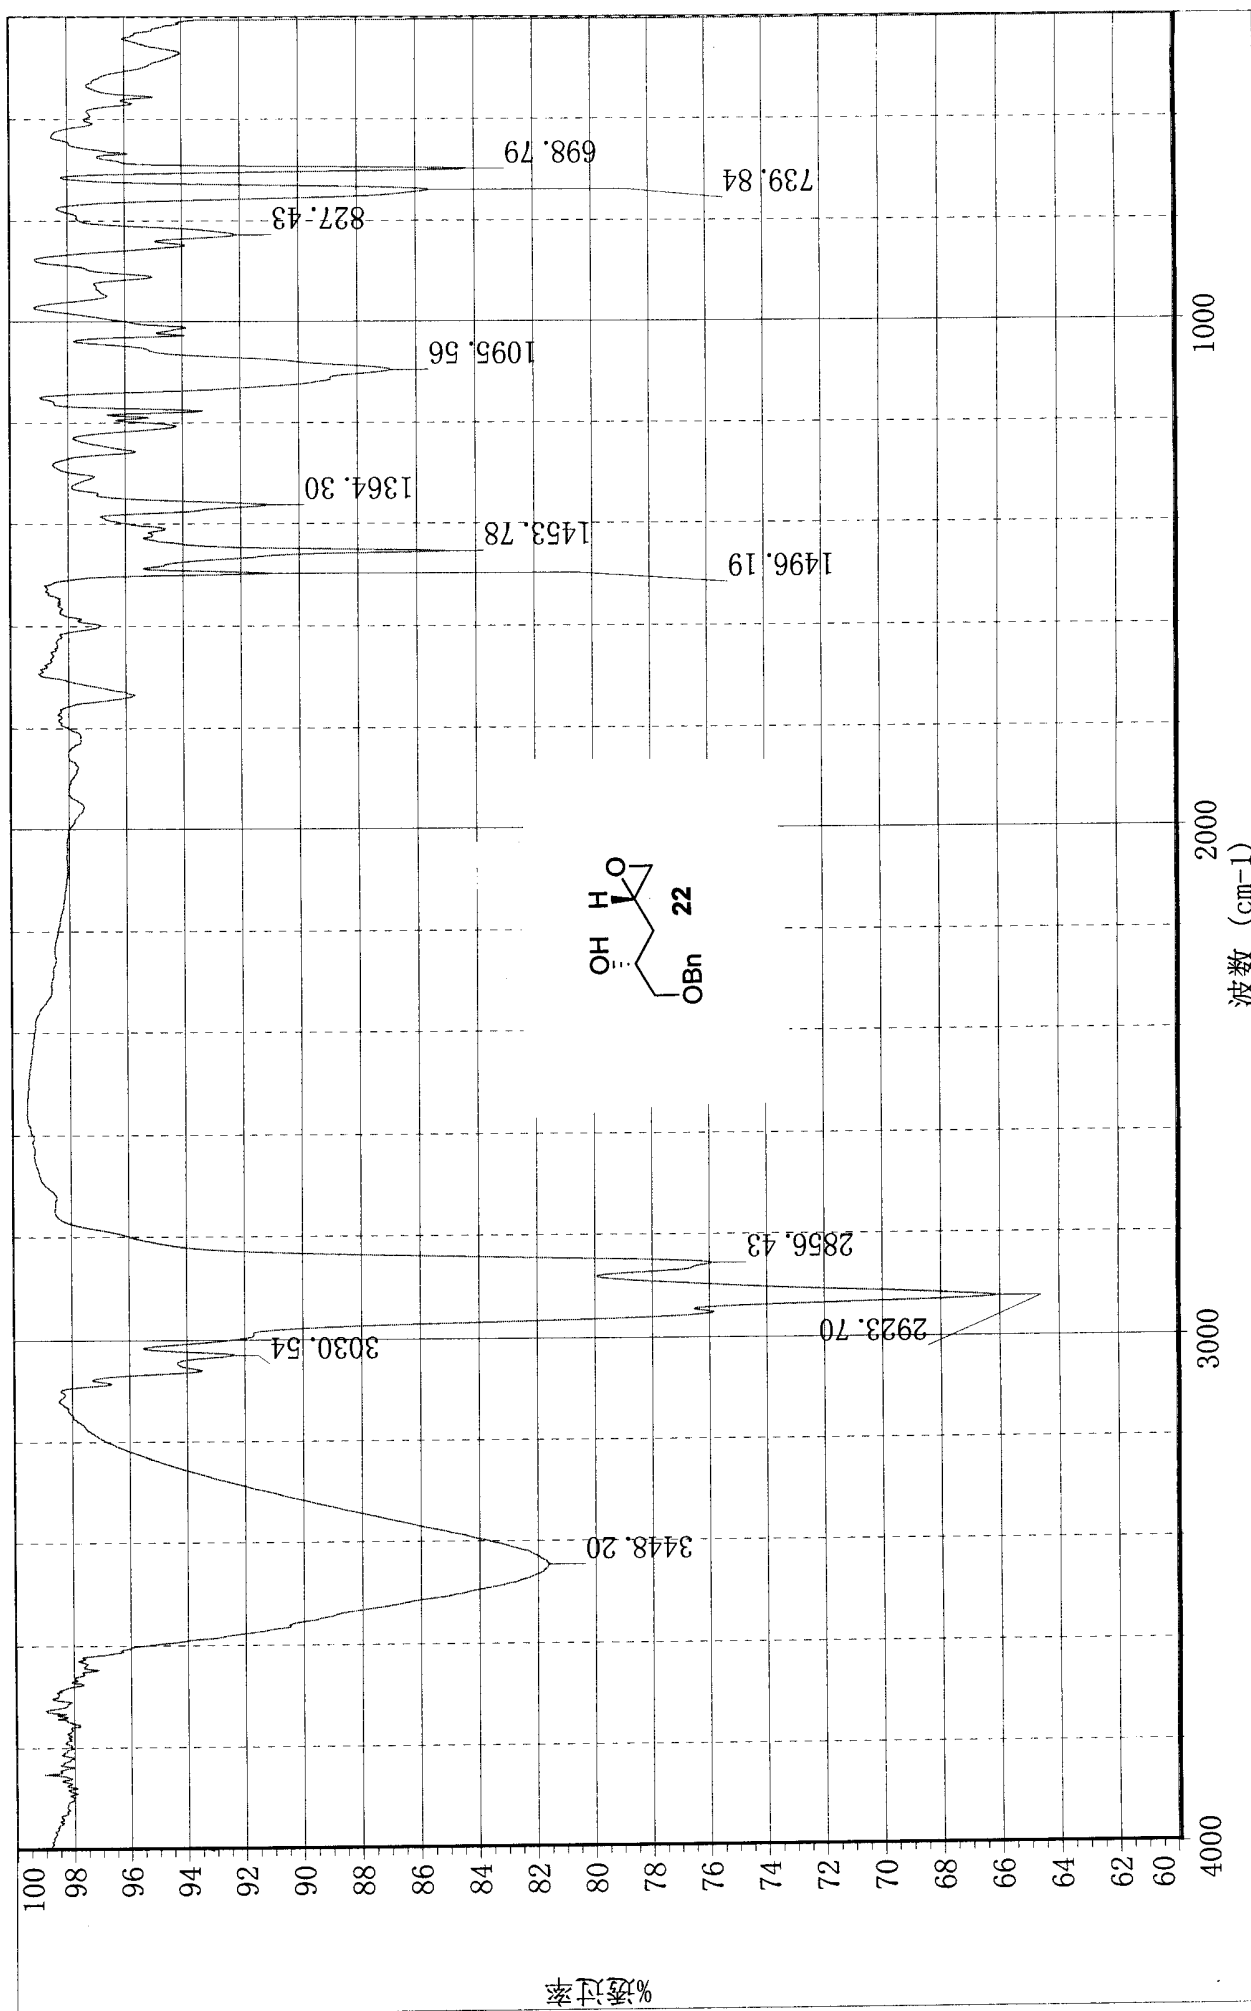

S 93

\*\*星期五 5月 13 16:33:28 2011

采集时间: 星期五 5月 13 16:34:12 2011 (GMT+08:00)

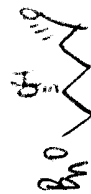

上海有机所生命有机化学国家重点实验室

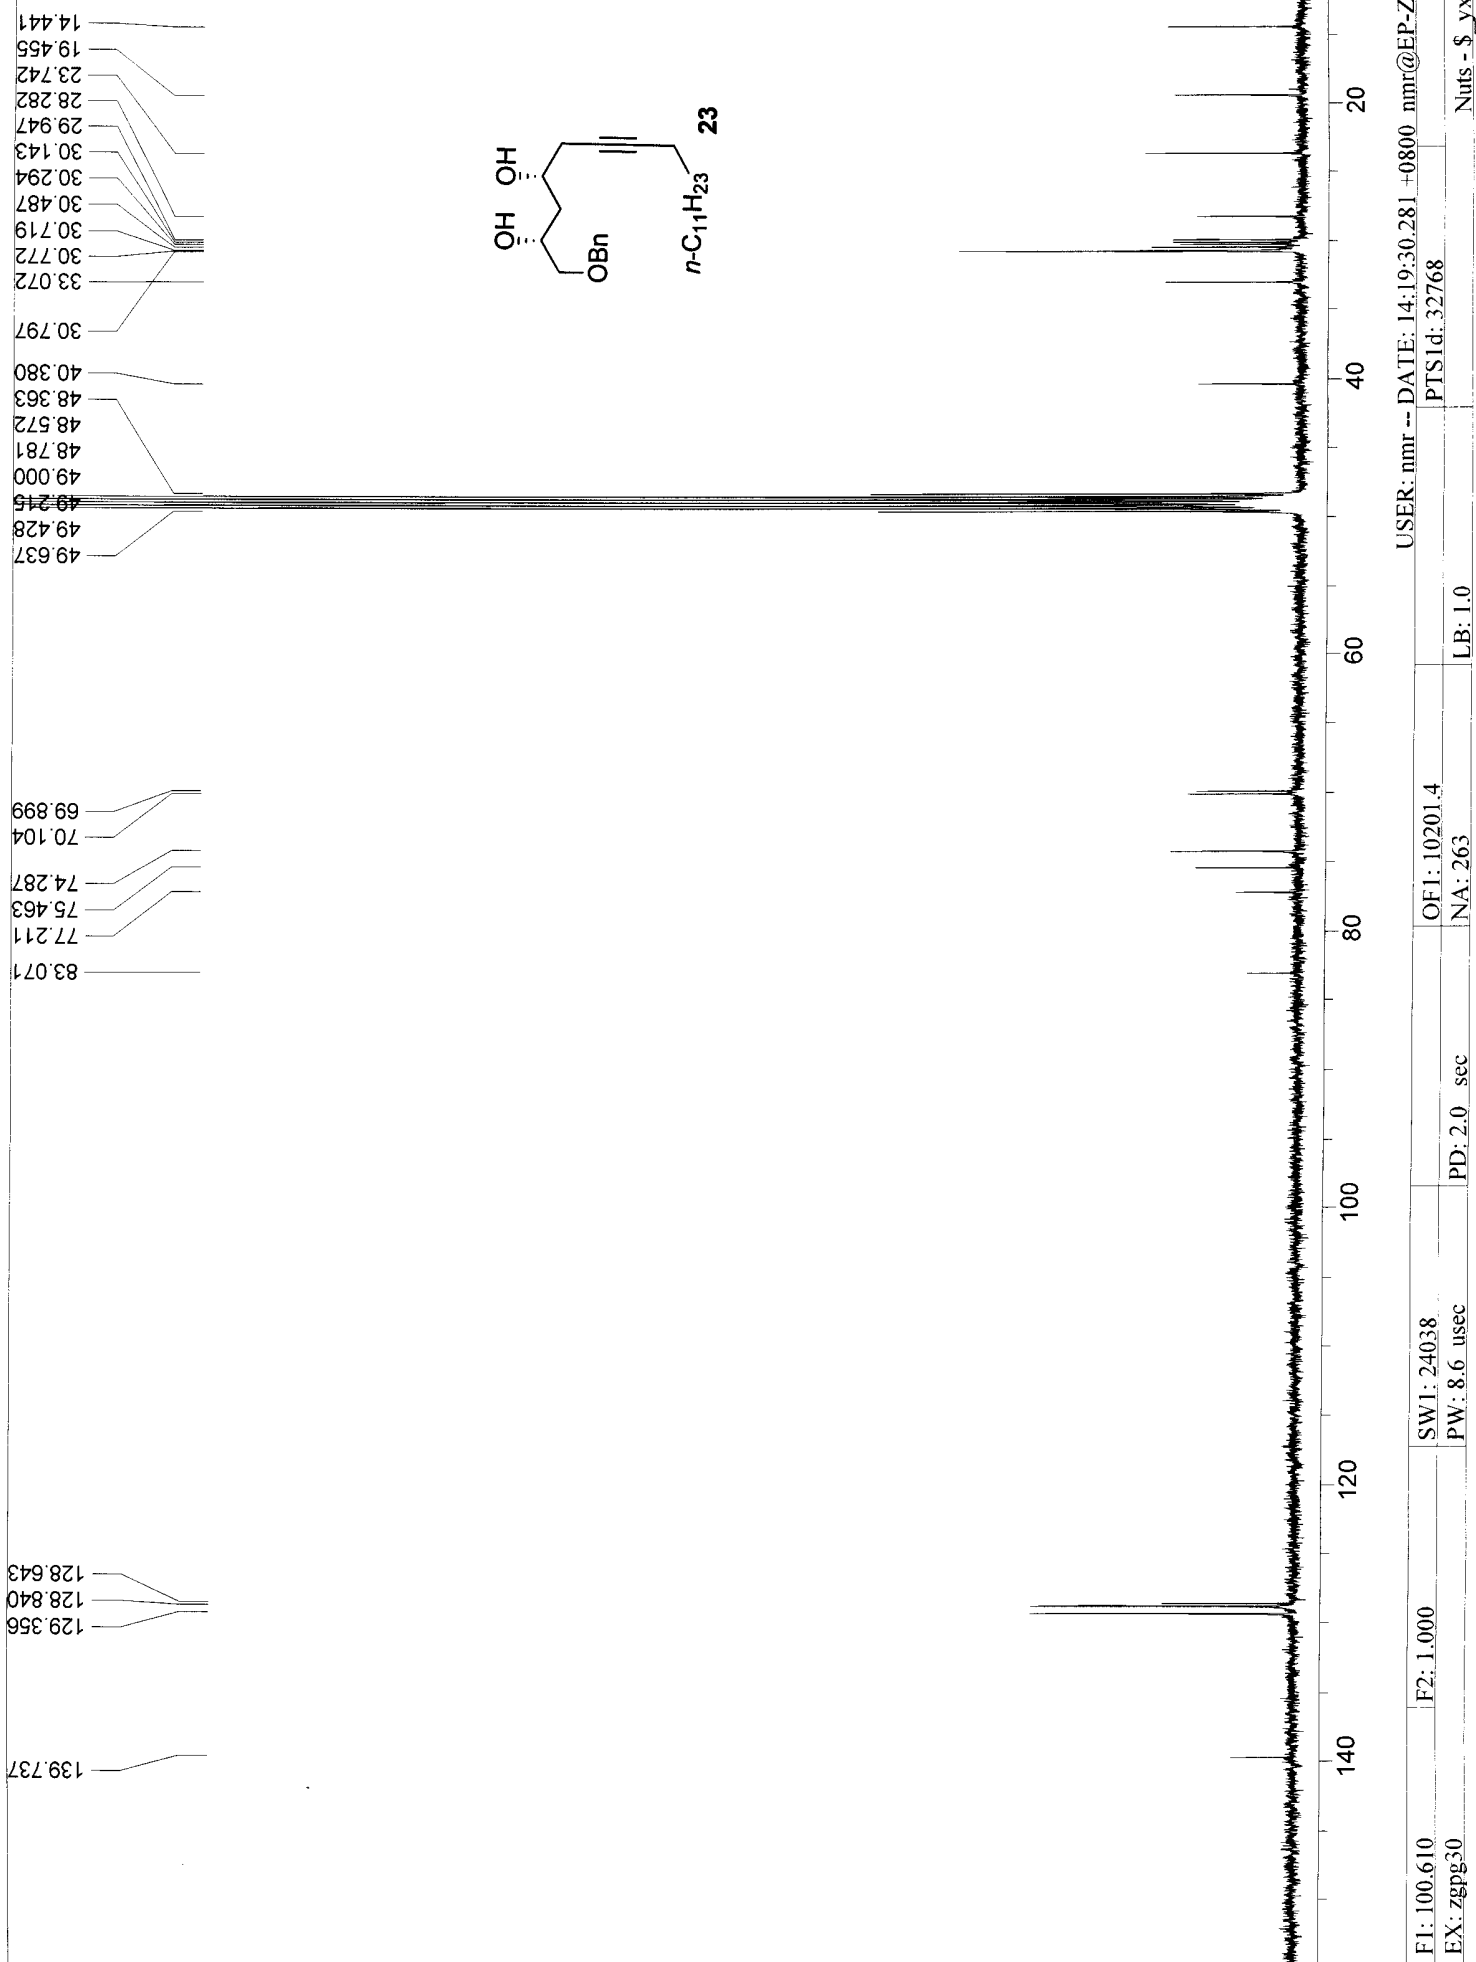



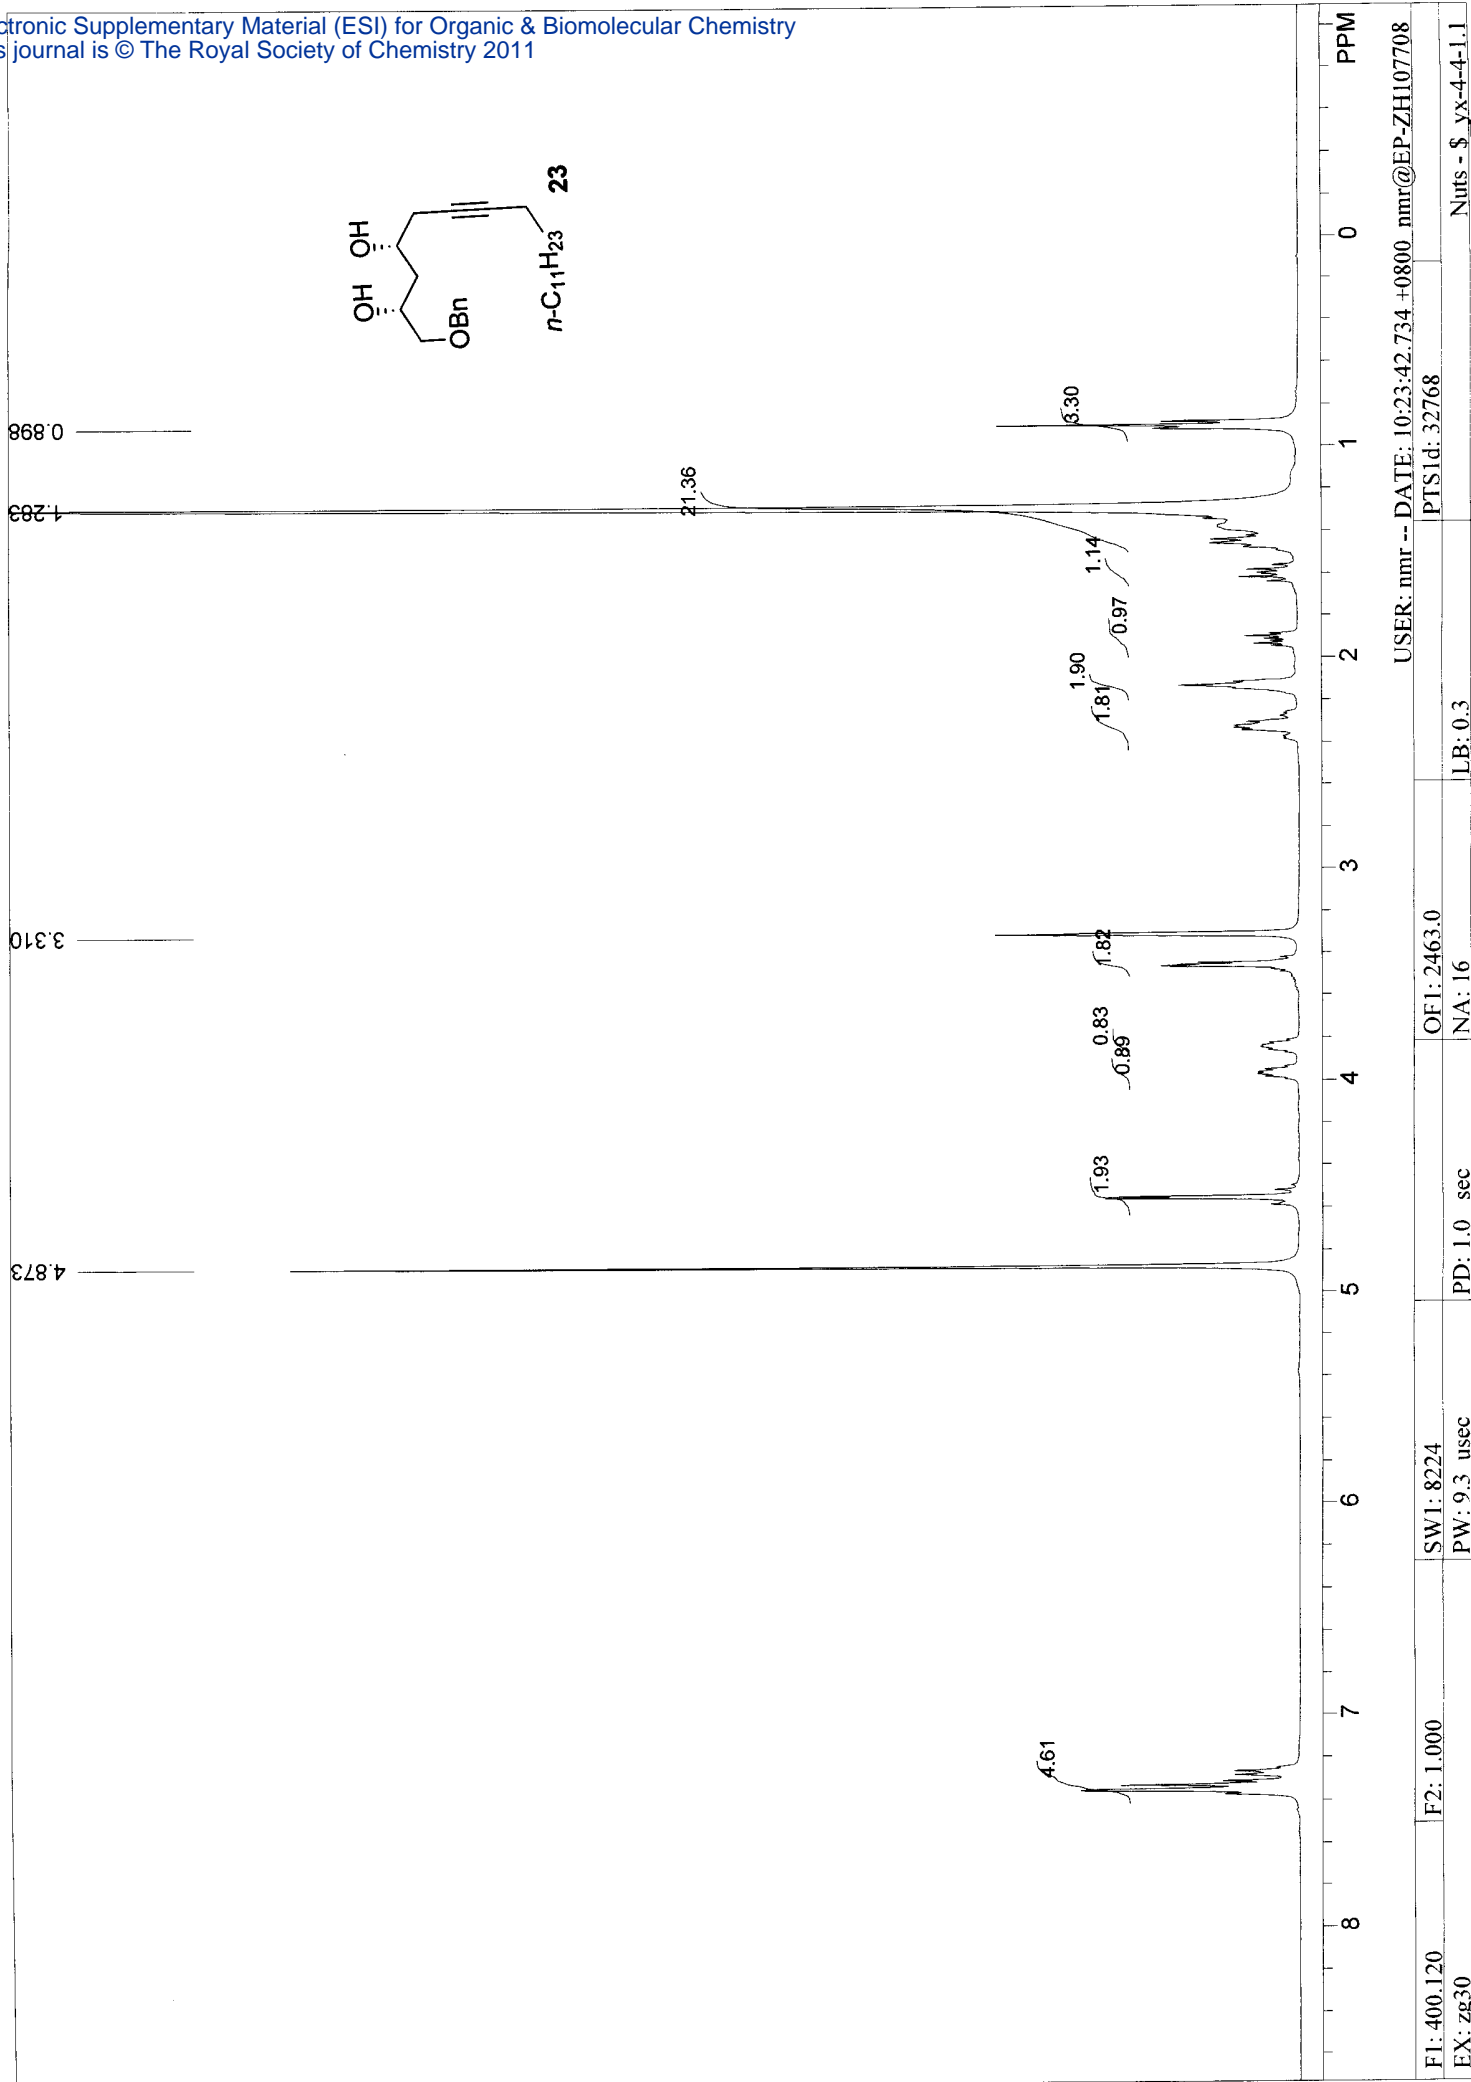

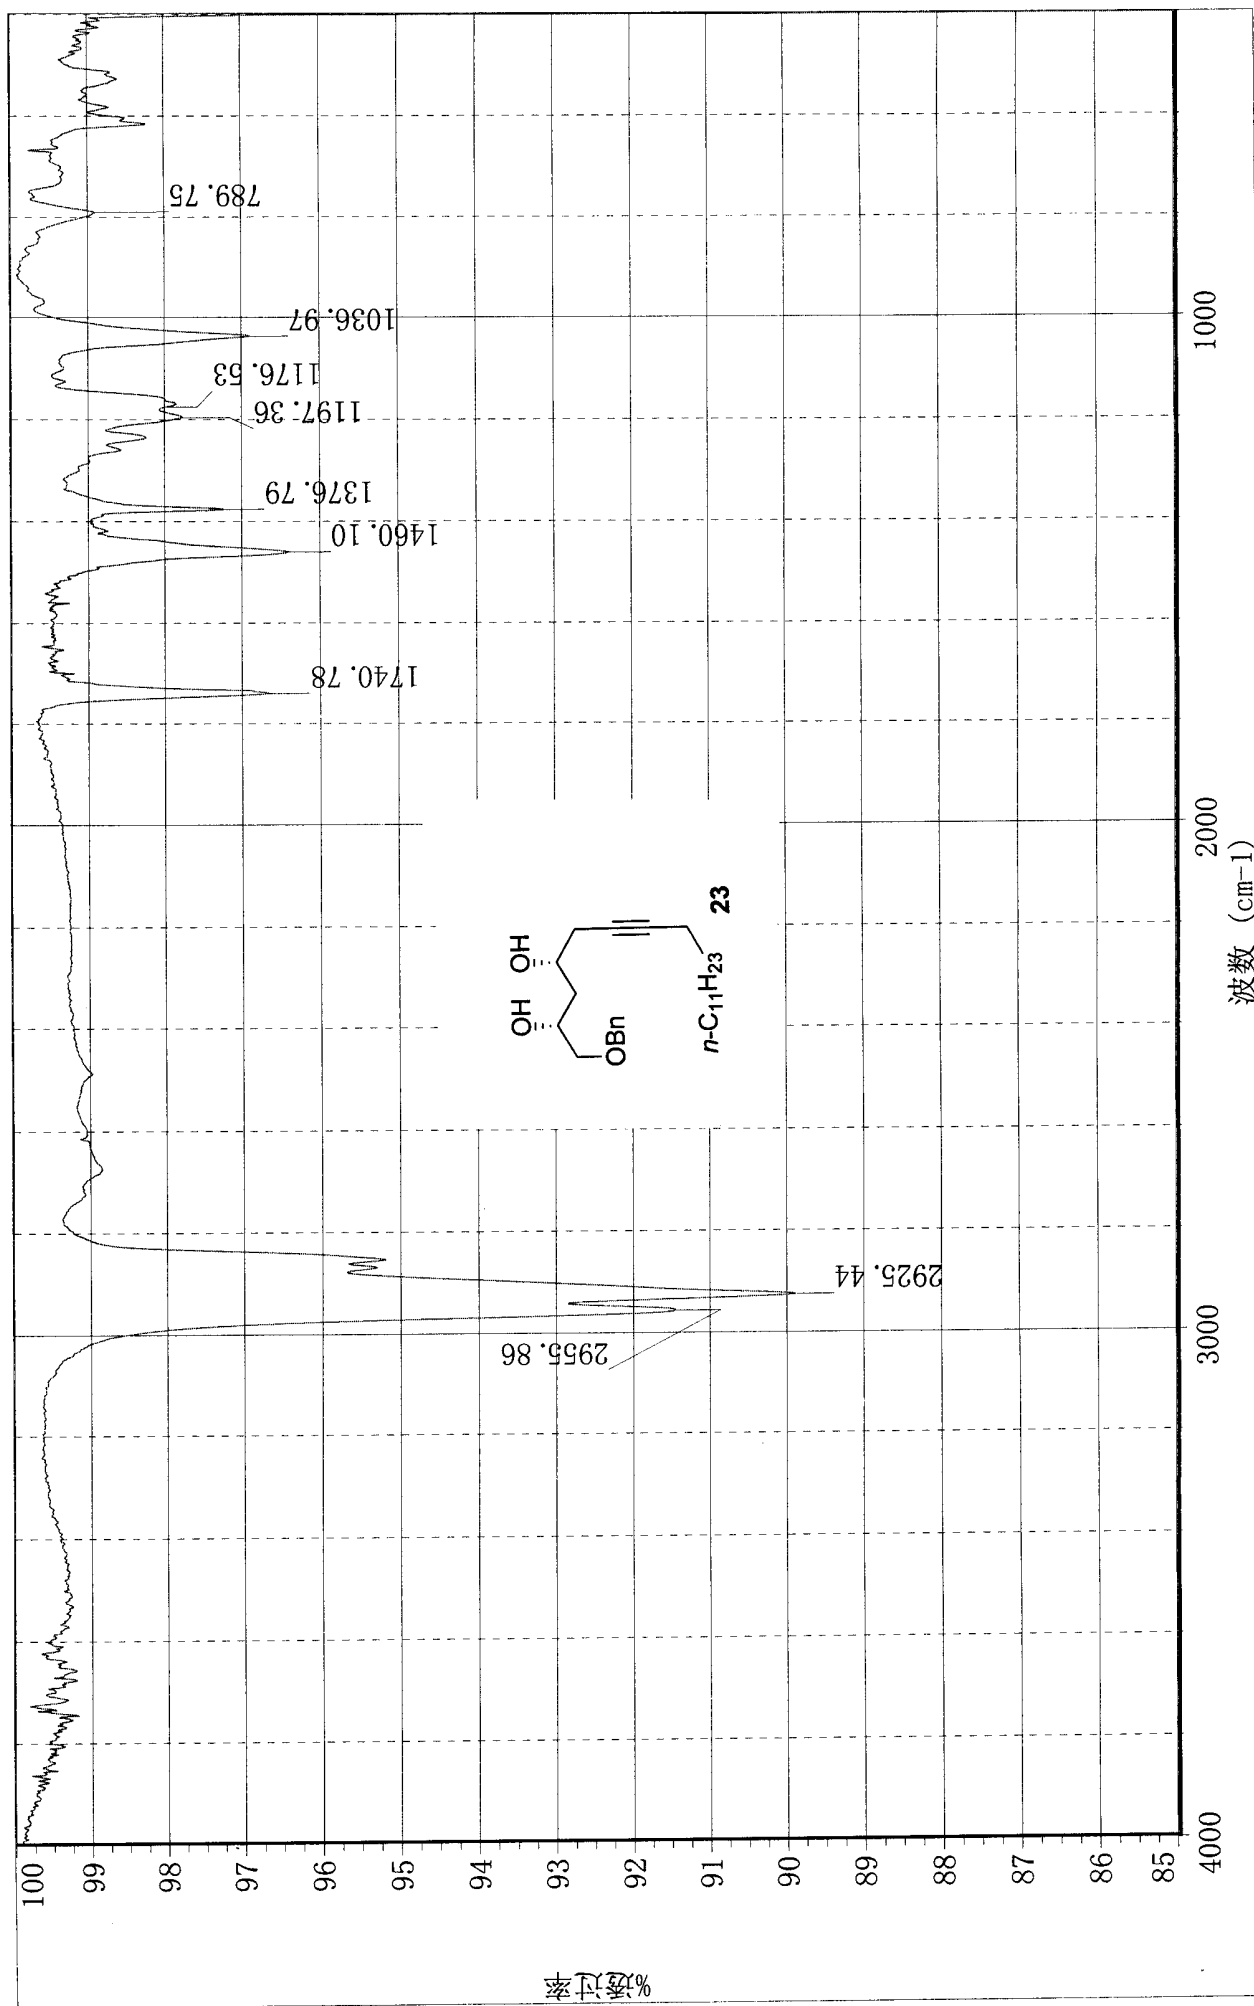

\*\*星期五 5月 13 16:57:50 2011

采集时间: 星期五 5月 13 16:58:31 2011 (GMT+08:00)

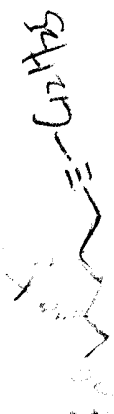

上海有机所生命有机化学国家重点实验室

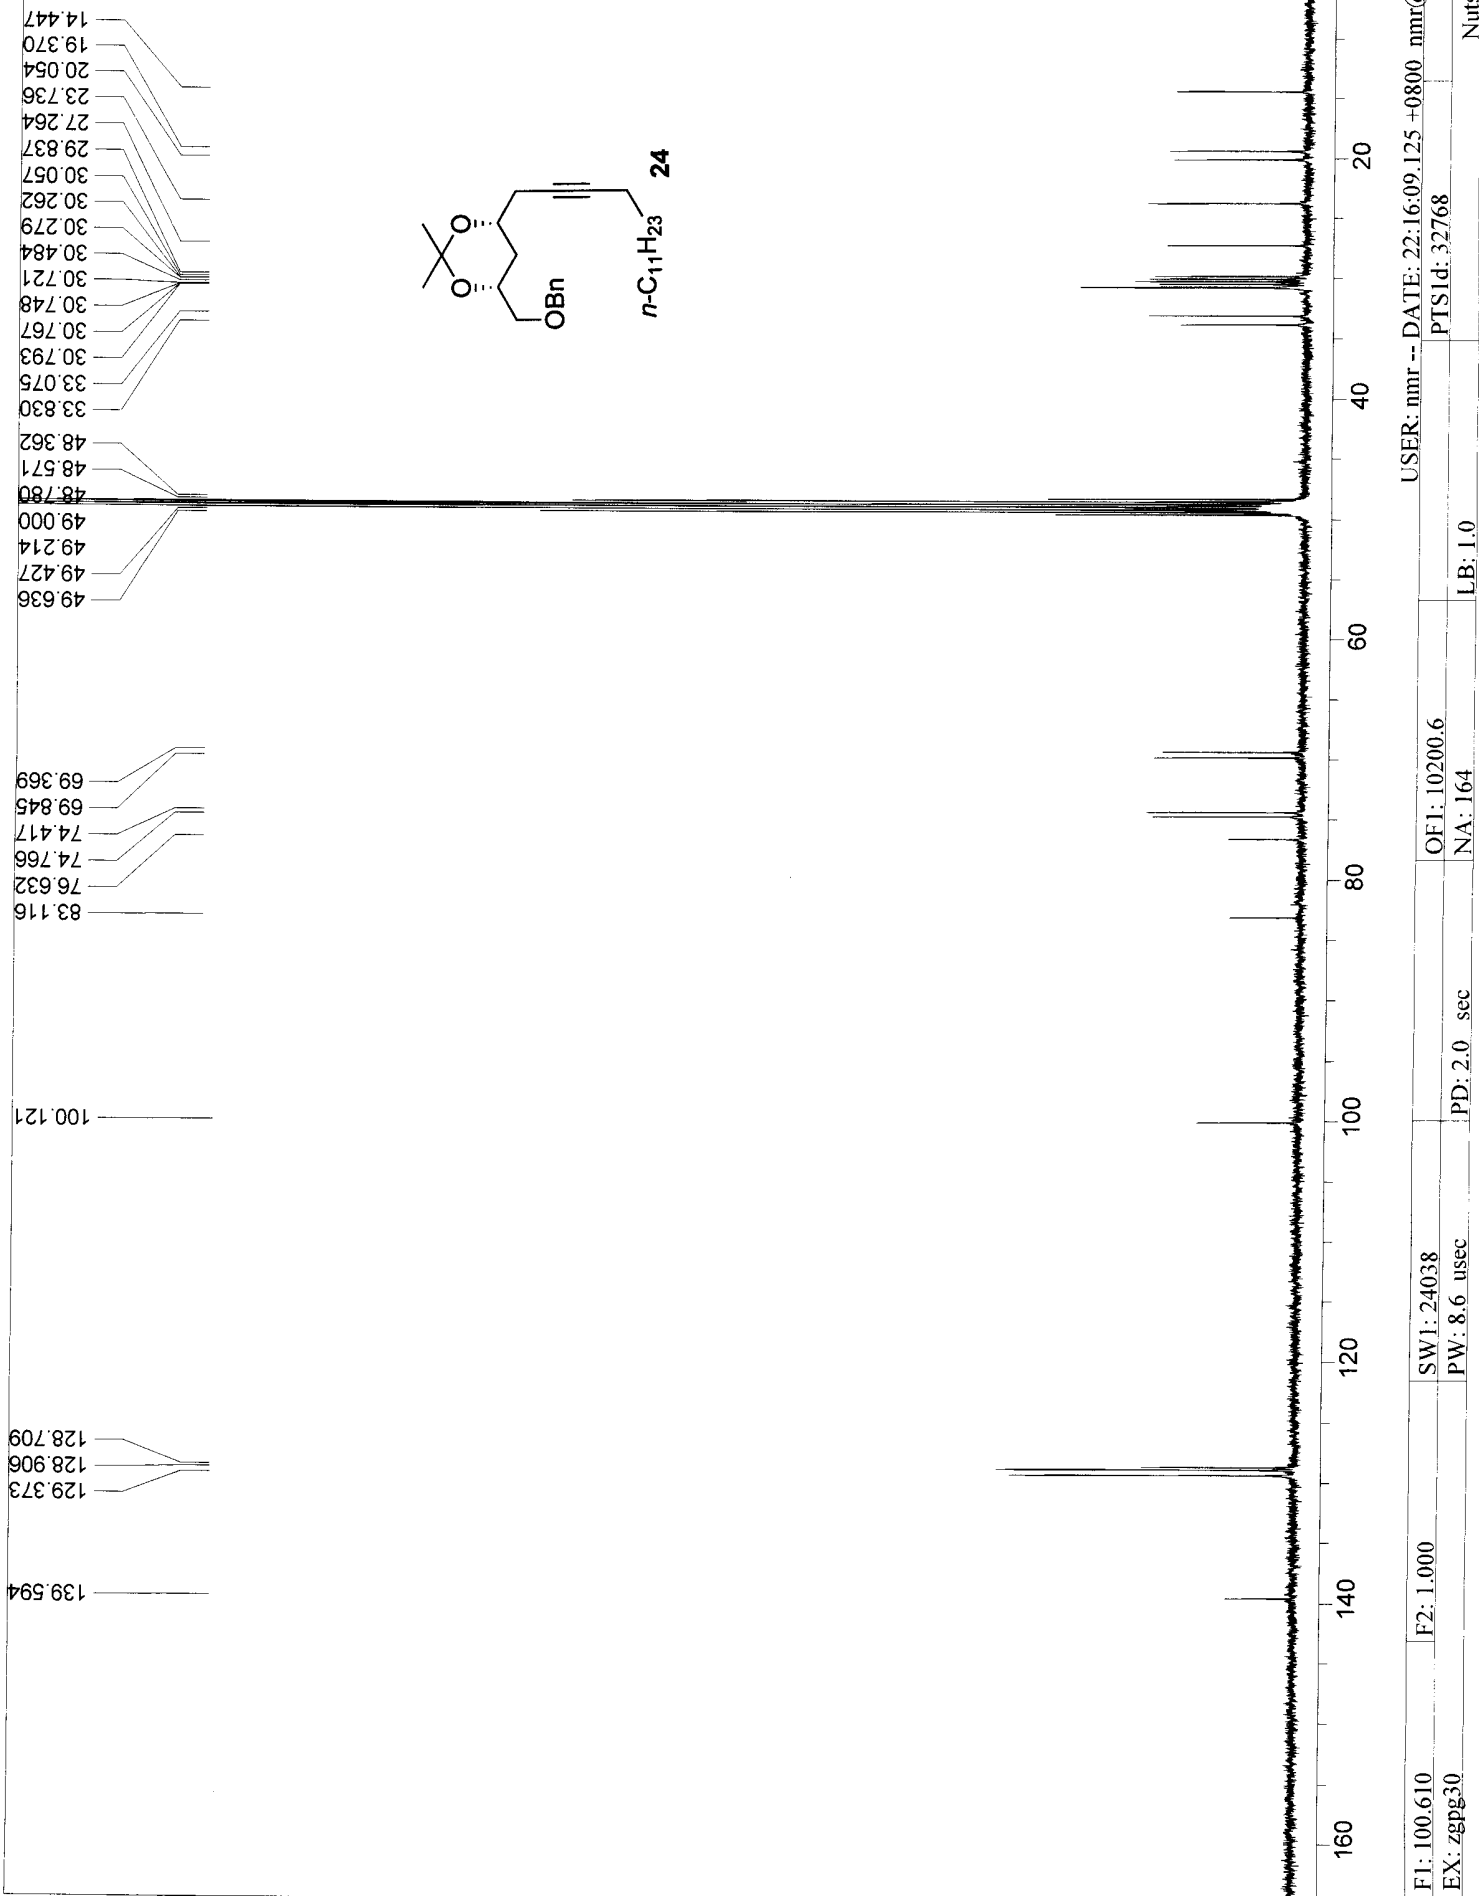

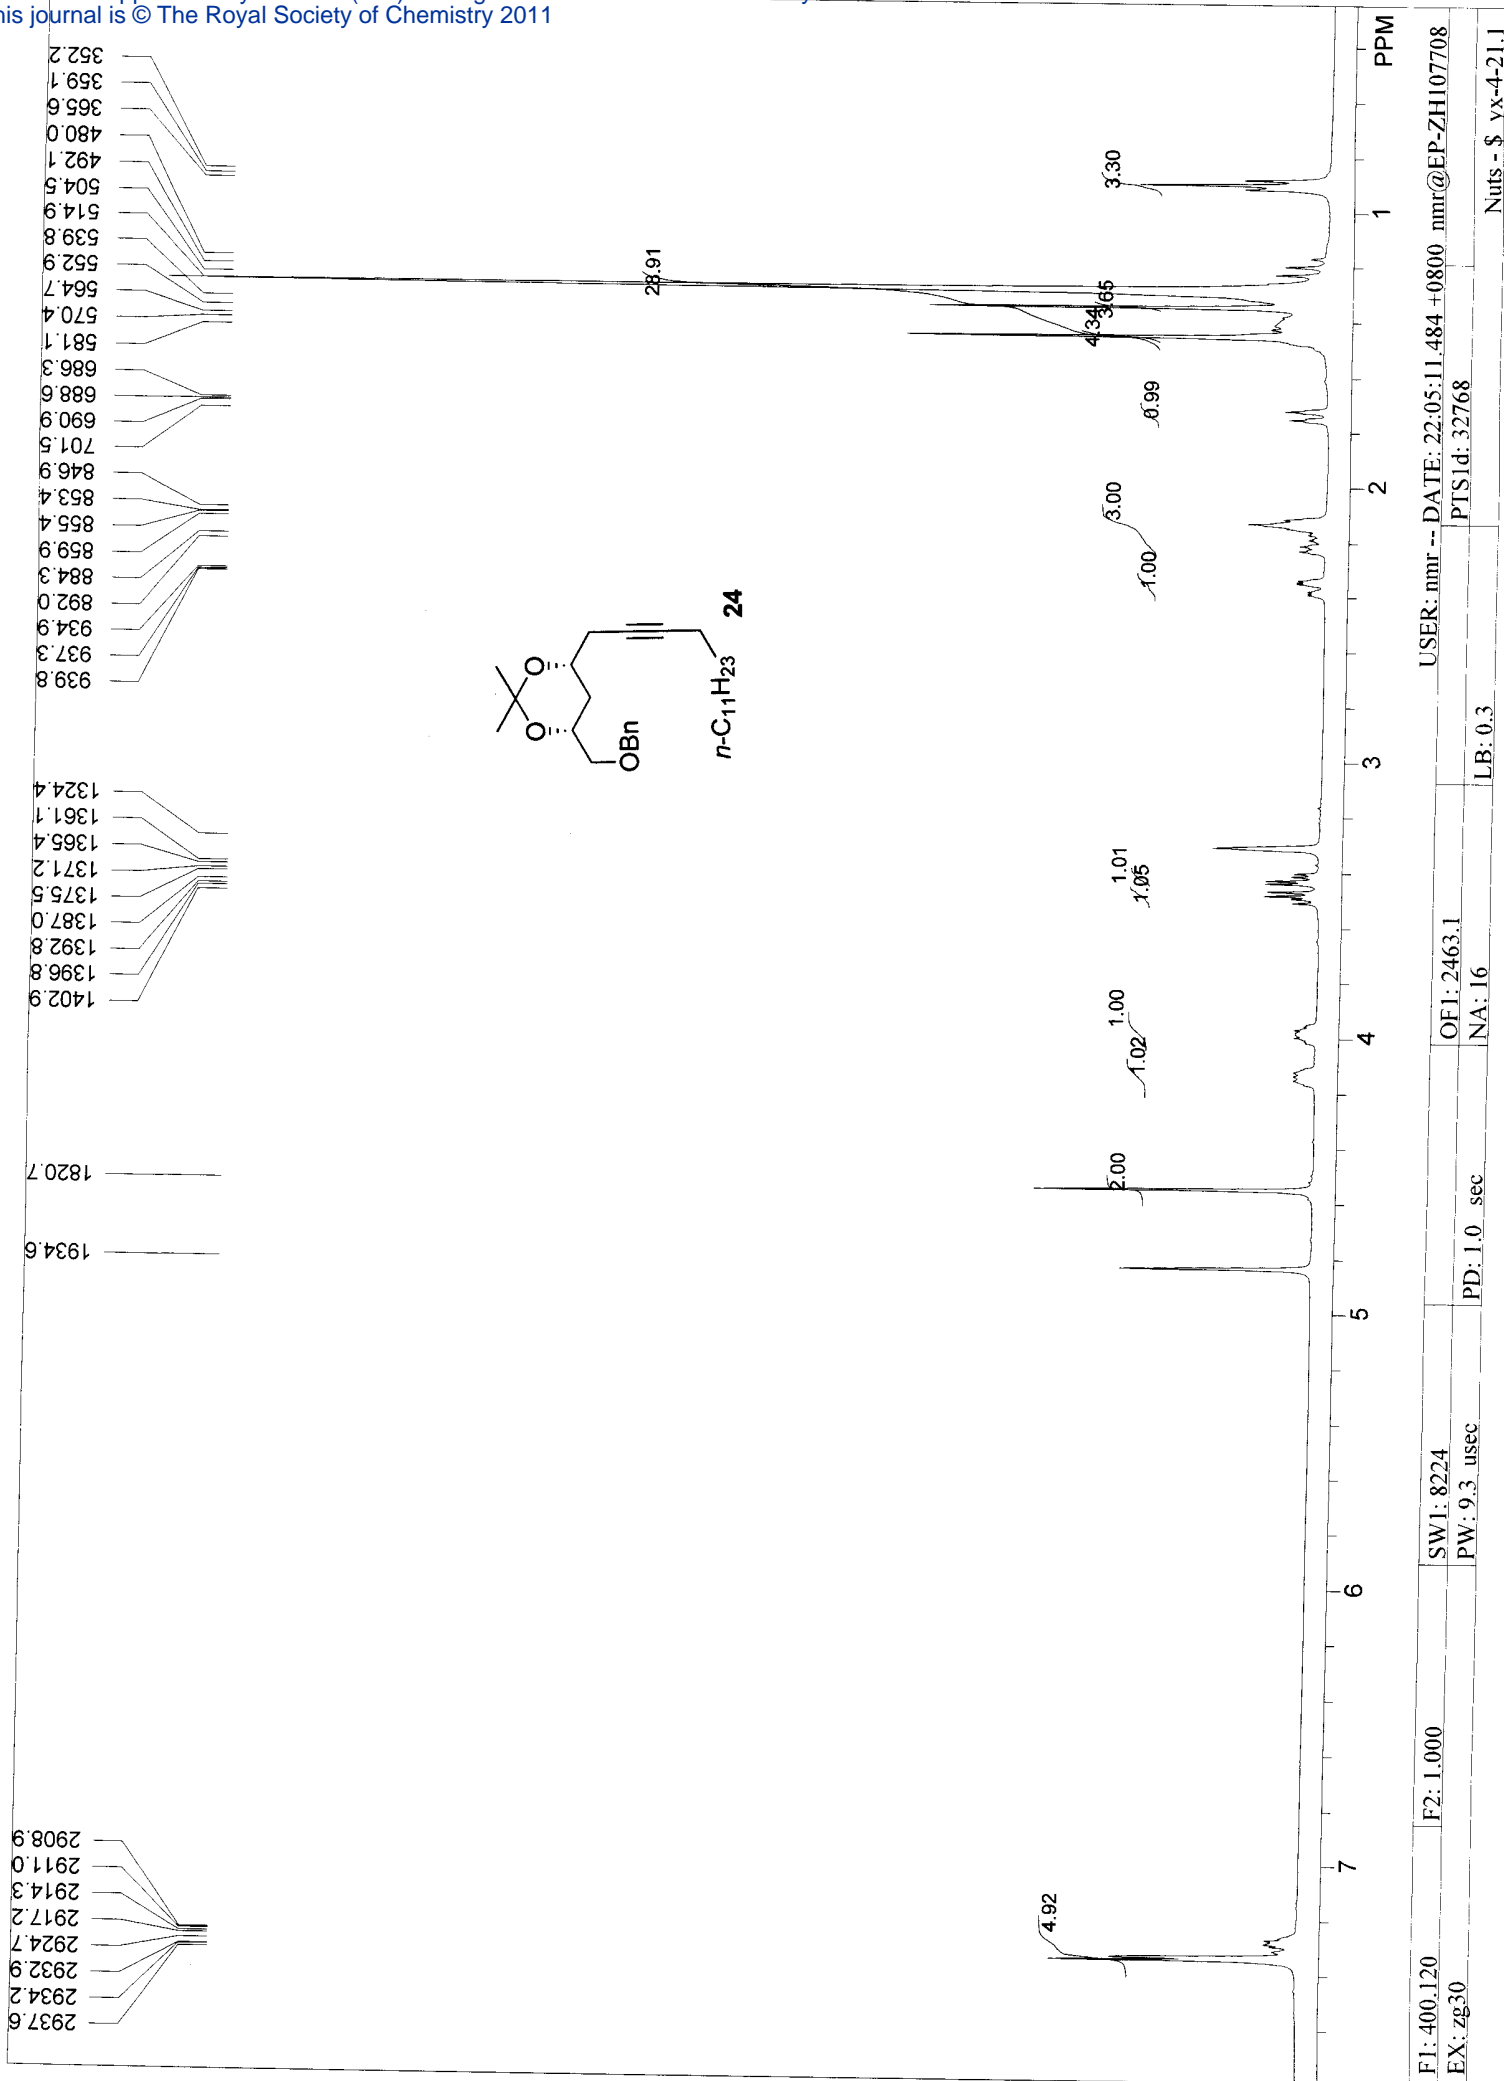

F1: 400.120 F2: 1.000 SW1: 8224  
 EX: zg30 PD: 1.0 sec OF1: 2463.1 NA: 16  
 USER: mmr -- DATE: 22:05:11.484 +0800 nmr@EP-ZH107708  
 PTS1d: 32768 LB: 0.3  
 Nuts - \$ \_yx-4-21.1

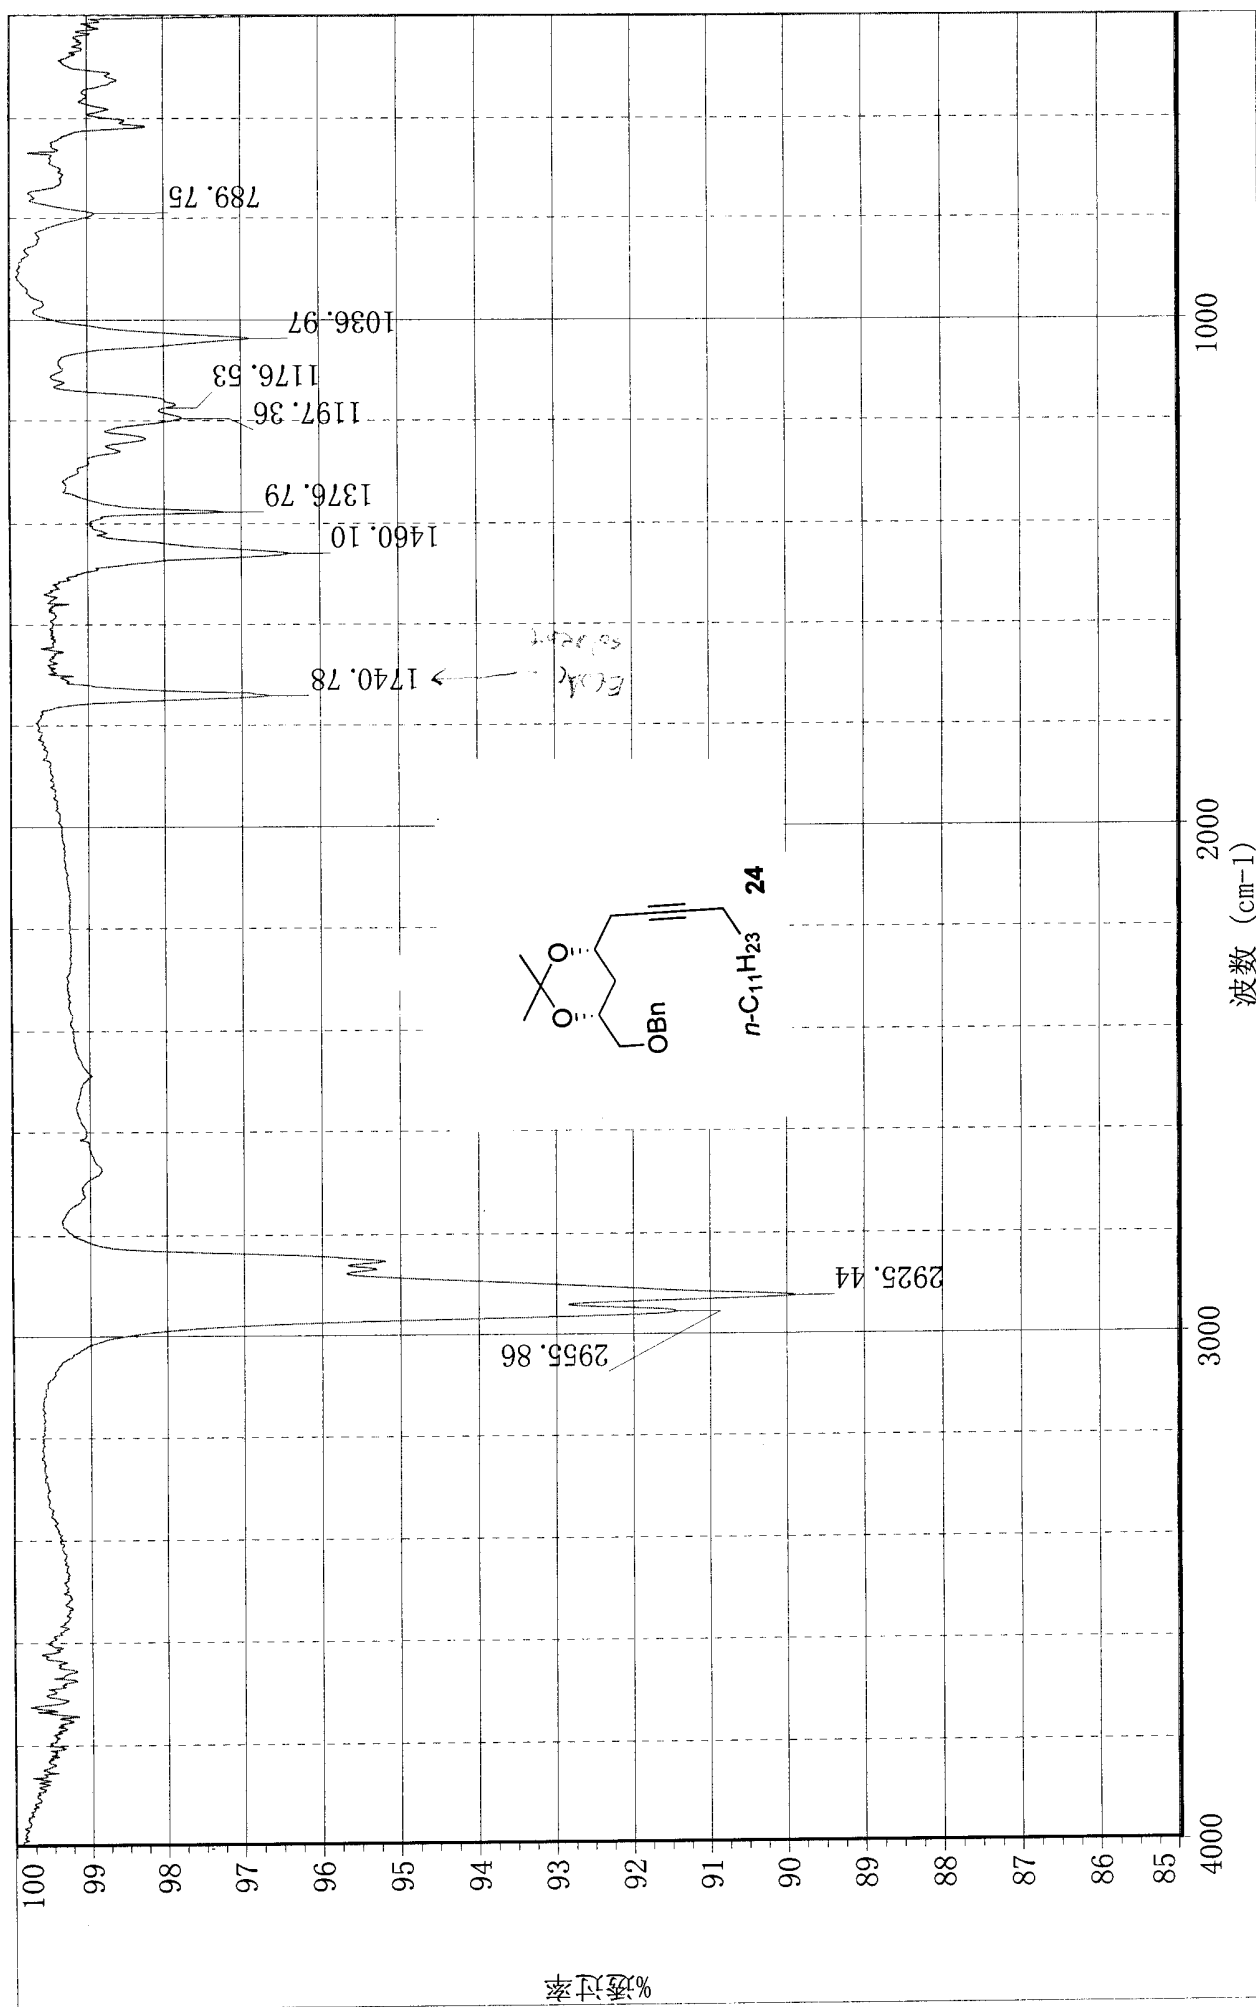

S 69

\*\*星期五 5月 13 16:57:50 2011

采集时间: 星期五 5月 13 16:58:31 2011 (GMT+08:00)

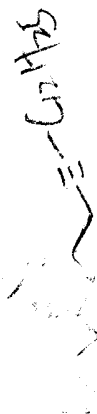

上海有机所生命有机化学国家重点实验室

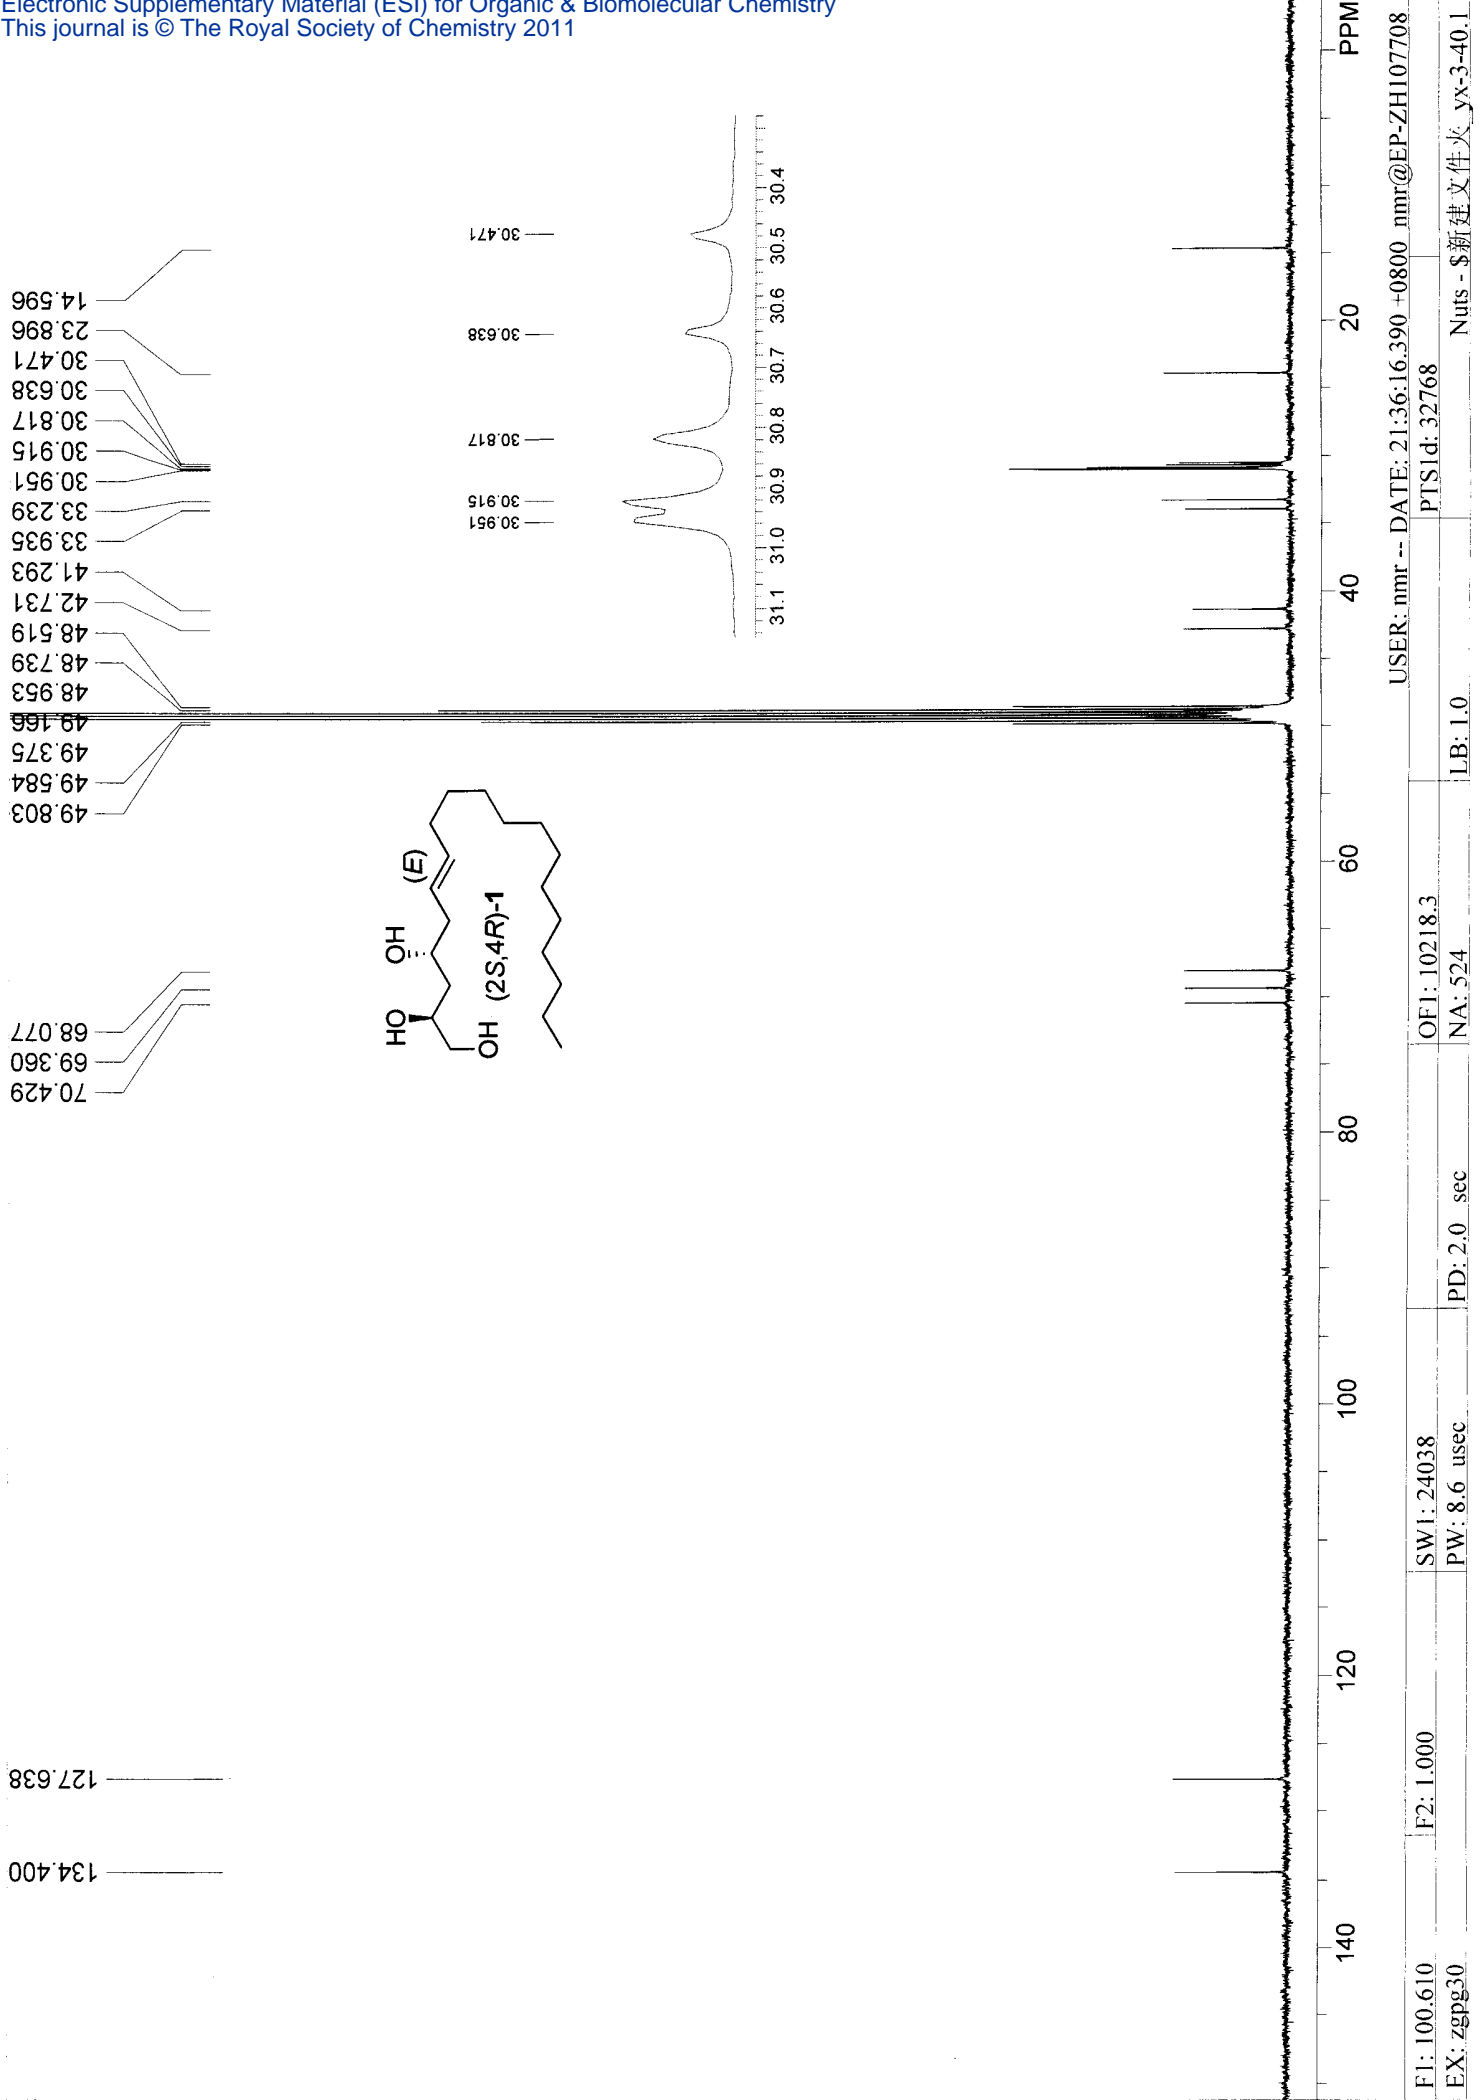

F1: 100.610 F2: 1.000 SW1: 24038 OF1: 10218.3  
 EX: zgpg30 PD: 2.0 sec NA: 524 LB: 1.0  
 USER: nmr -- DATE: 21:36:16.390 +0800 nmr@EP-ZHI07708  
 P1SId: 32768 Nuts - \$新建文件夹\_yx-3-40.1

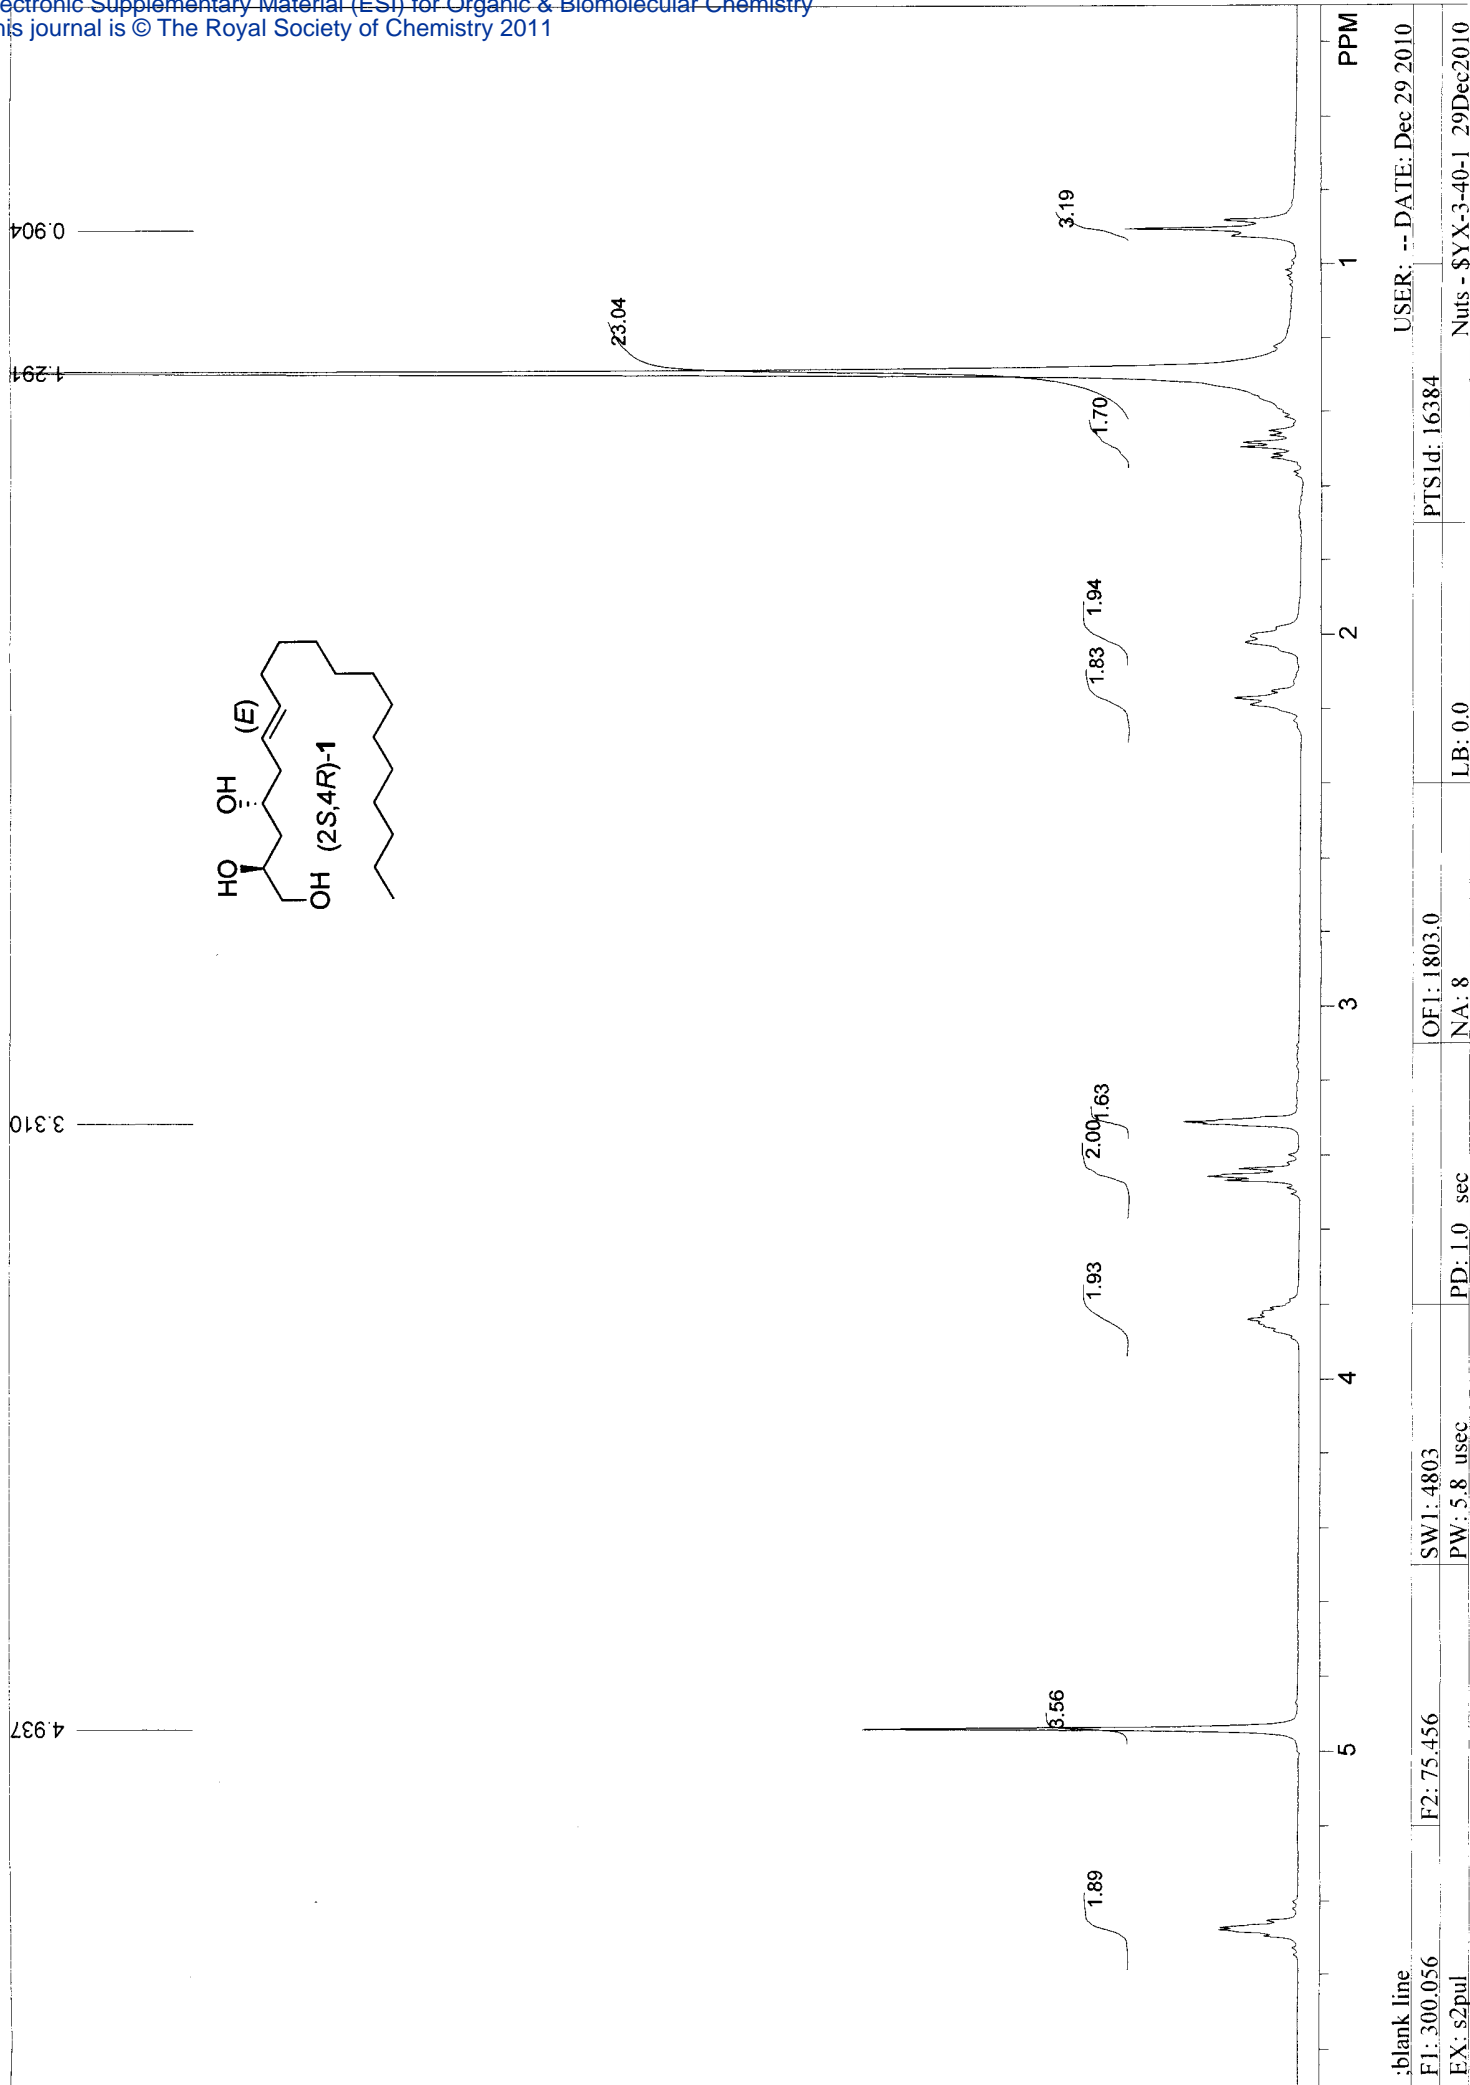

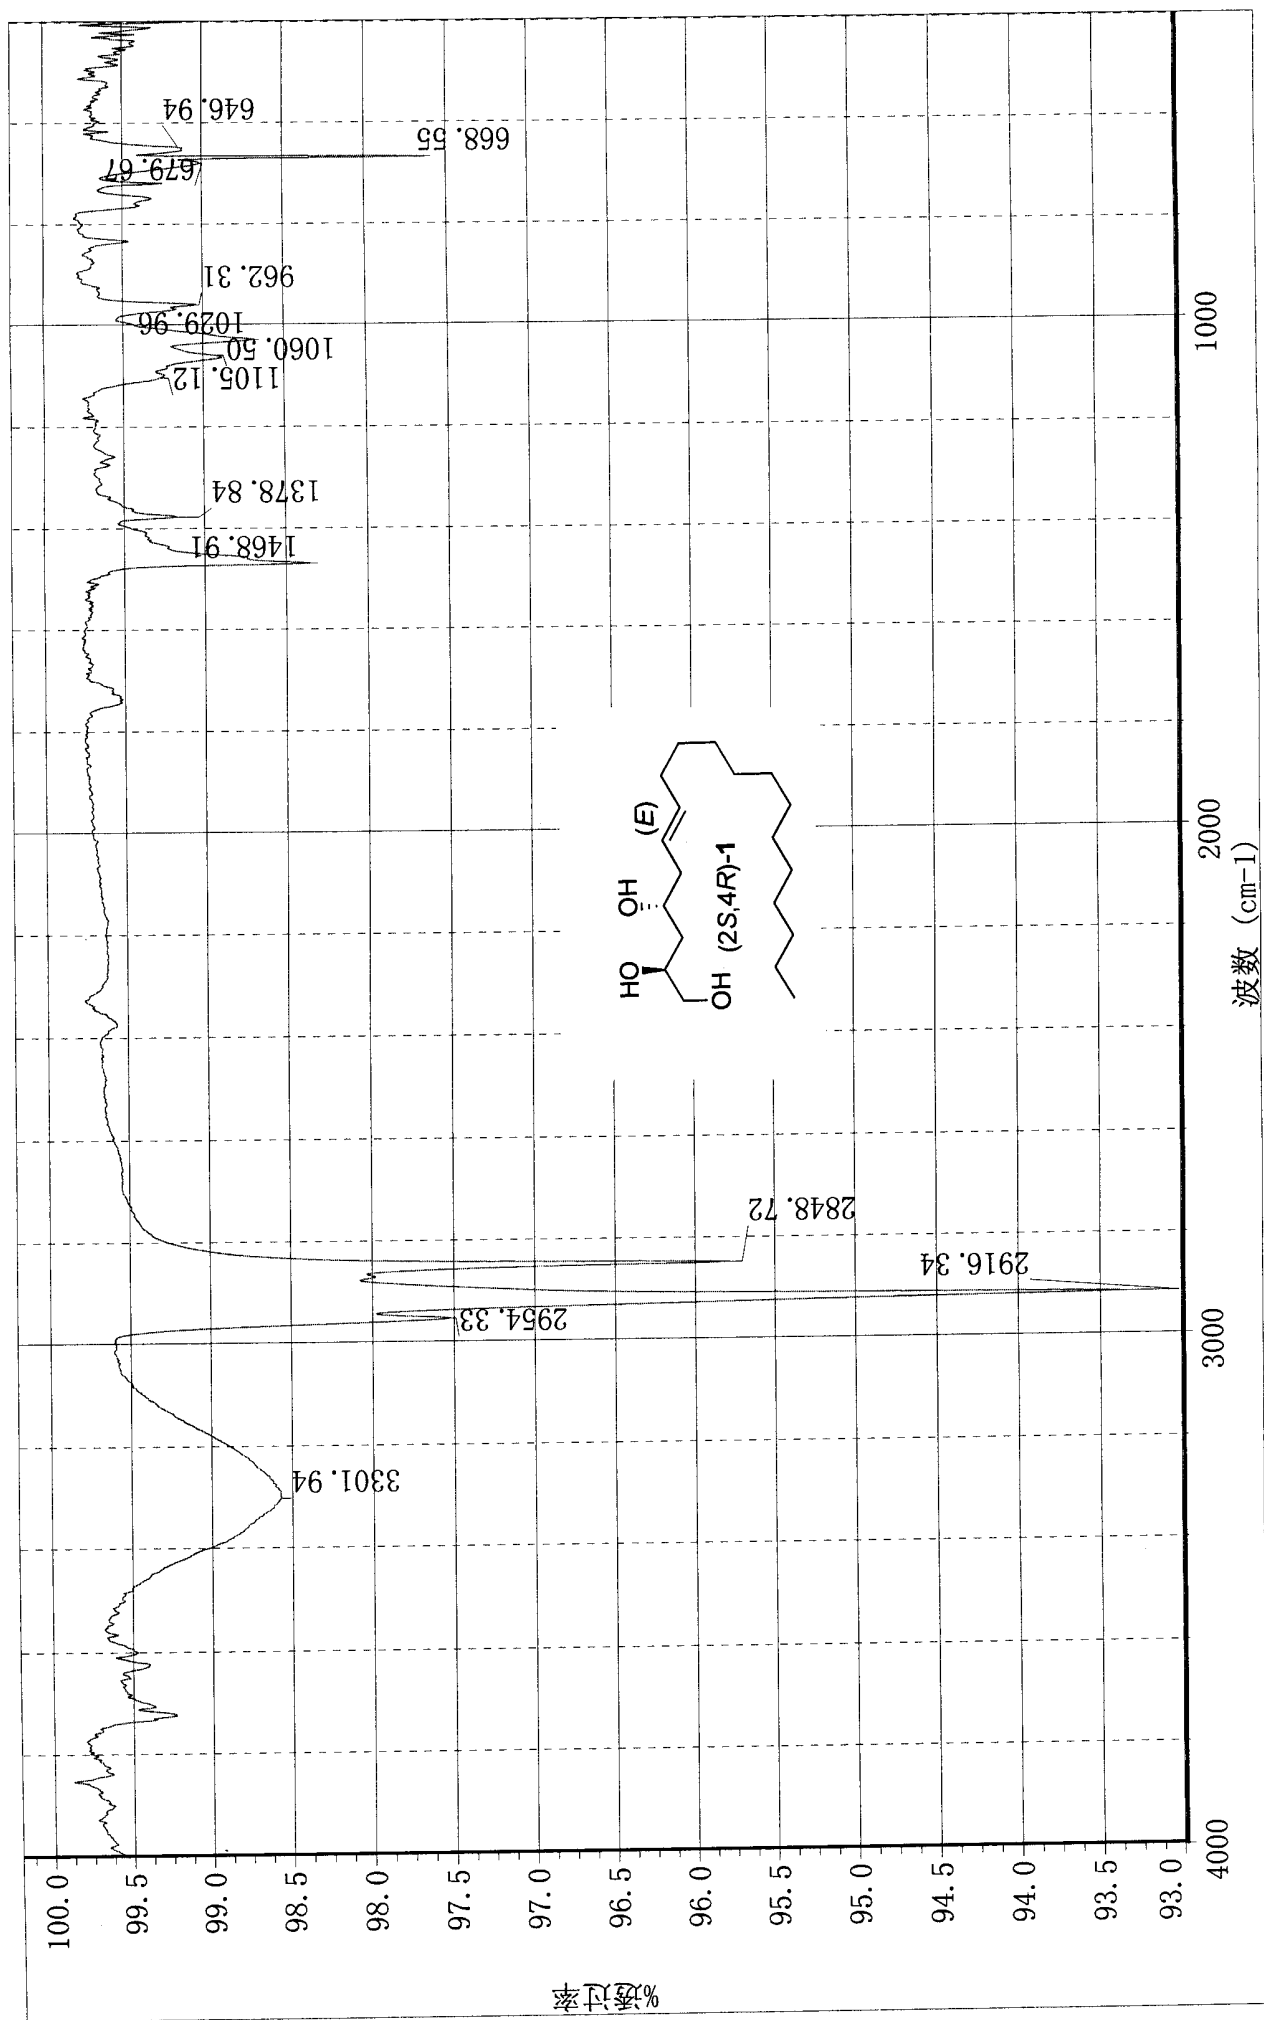

\*\*\*\*yx-3-40

采集时间: 星期三 2月 16 09:53:30 2011 (GMT+08:00)

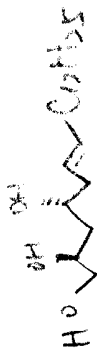

上海有机所生命有机化学国家重点实验室



14.428  
23.733  
30.290  
30.472  
30.638  
30.759  
30.790  
33.074  
33.755  
40.459  
41.841  
48.353  
48.571  
48.786  
49.000  
49.209  
49.418  
49.635

67.240  
71.200  
72.090

127.211  
134.404

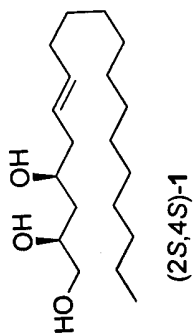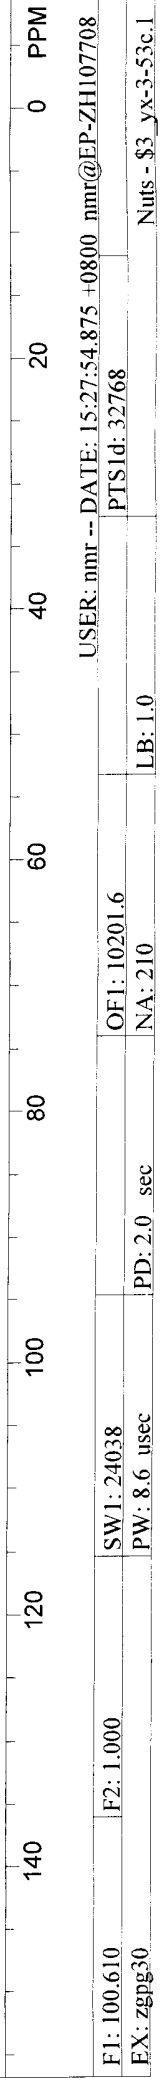

F1: 100.610 F2: 1.000 SW1: 24038  
EX: zgpg30 PD: 2.0 sec NA: 210 OF1: 10201.6 LB: 1.0  
USER: nmr -- DATE: 15:27:54.875 +0800 nmr@EP-ZH1107708  
PTSID: 32768 Nuts - \$3\_yx-3-53c.1

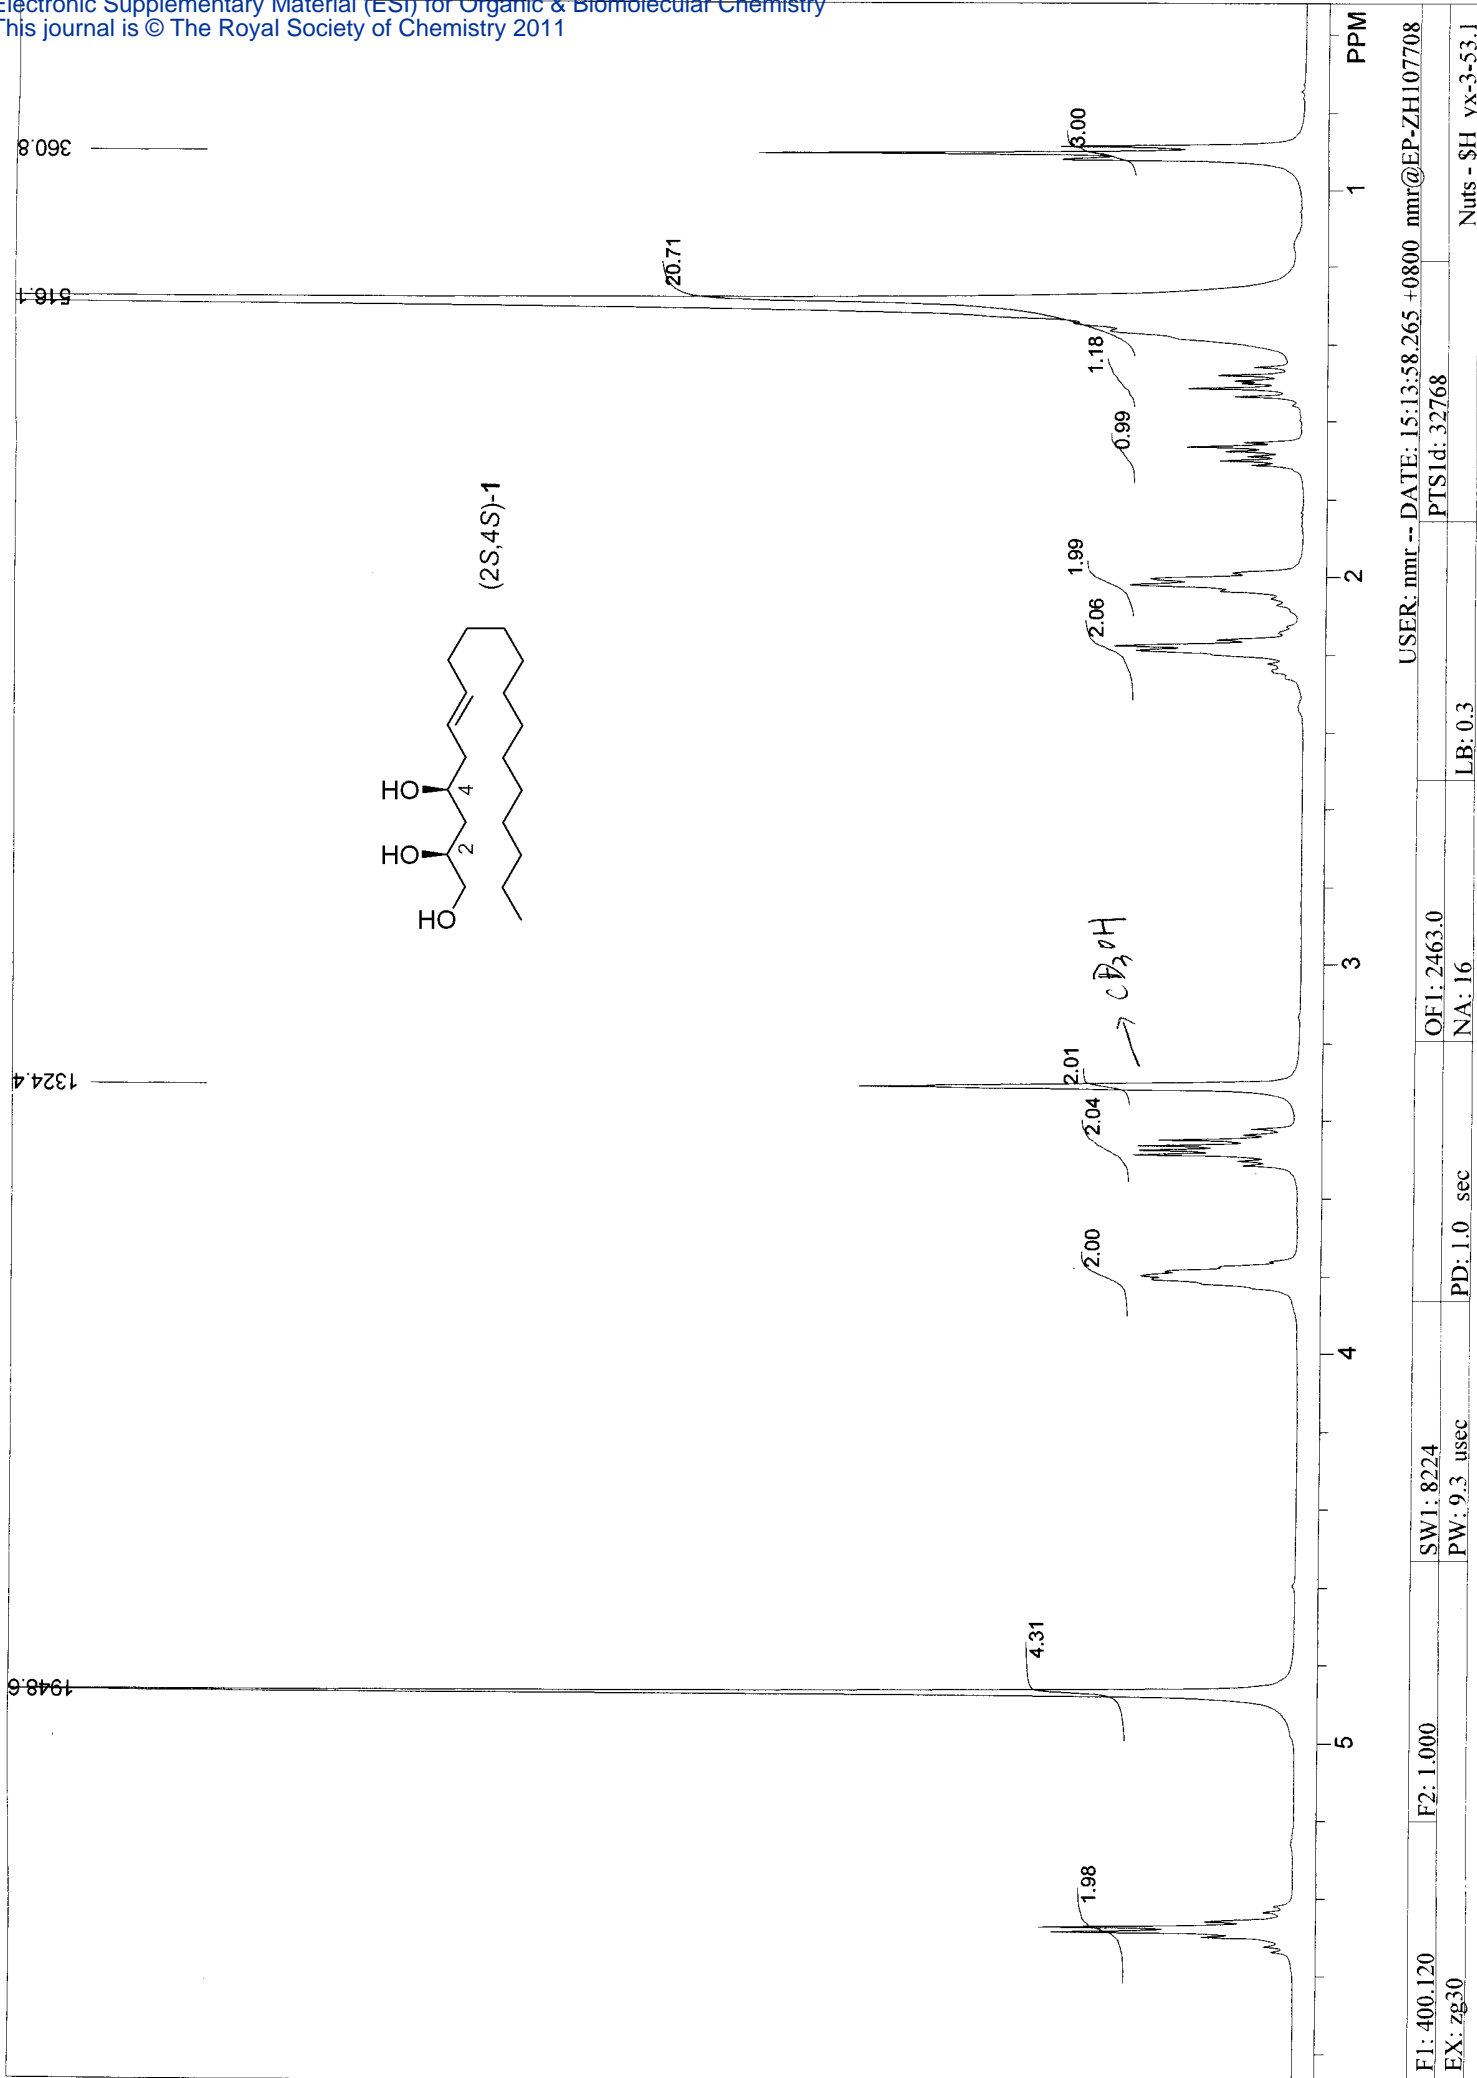

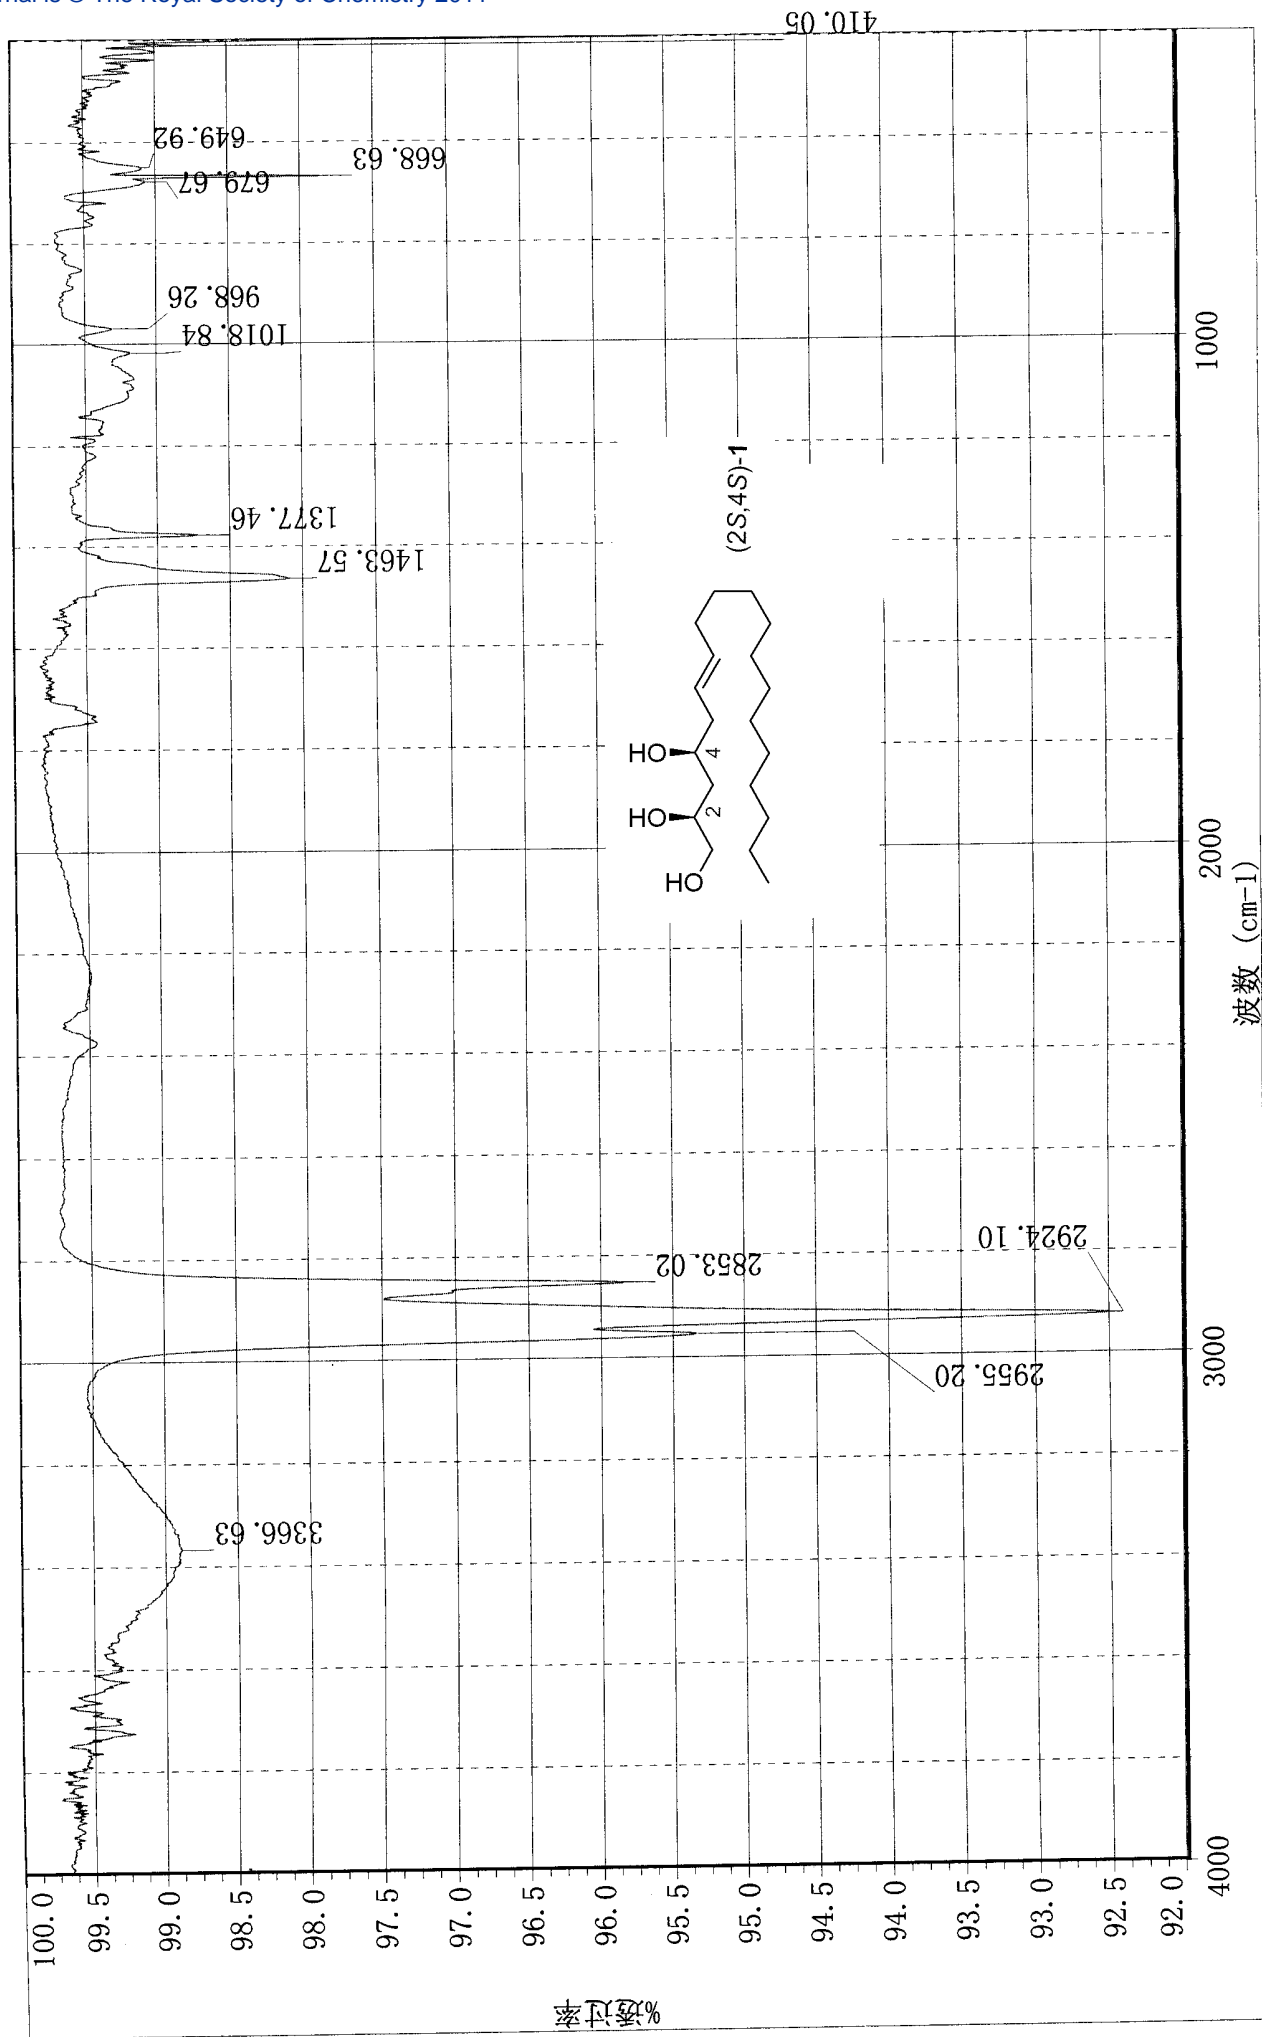

S 75

\*yx-3-53

采集时间: 星期三 2月 16 10:11:36 2011 (GMT+08:00)

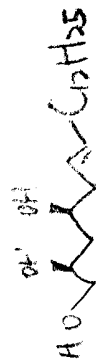

上海有机所生命有机化学国家重点实验室

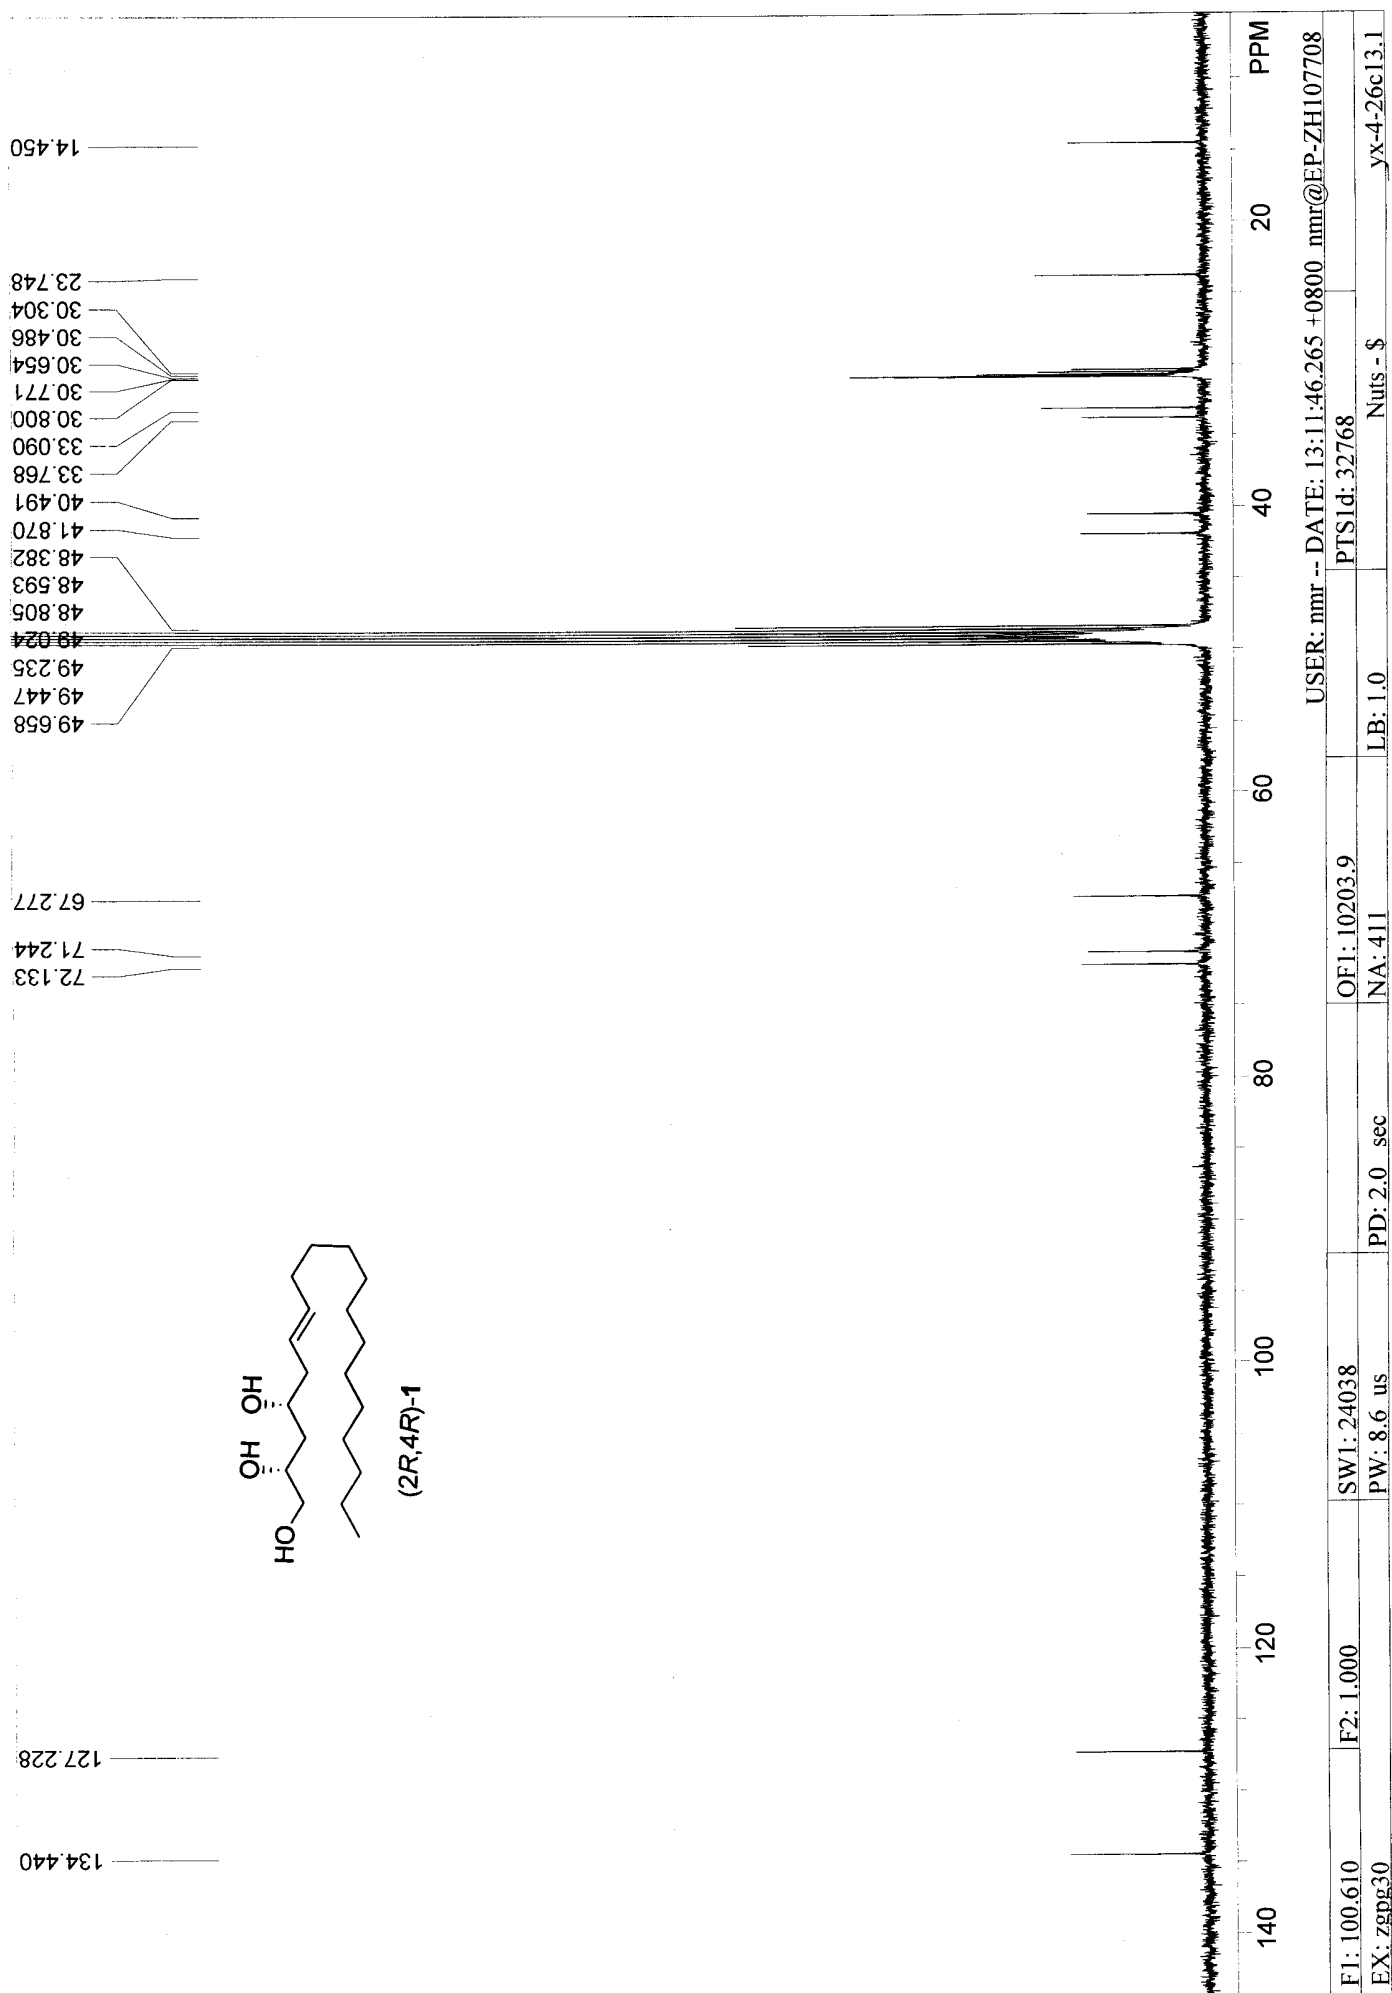

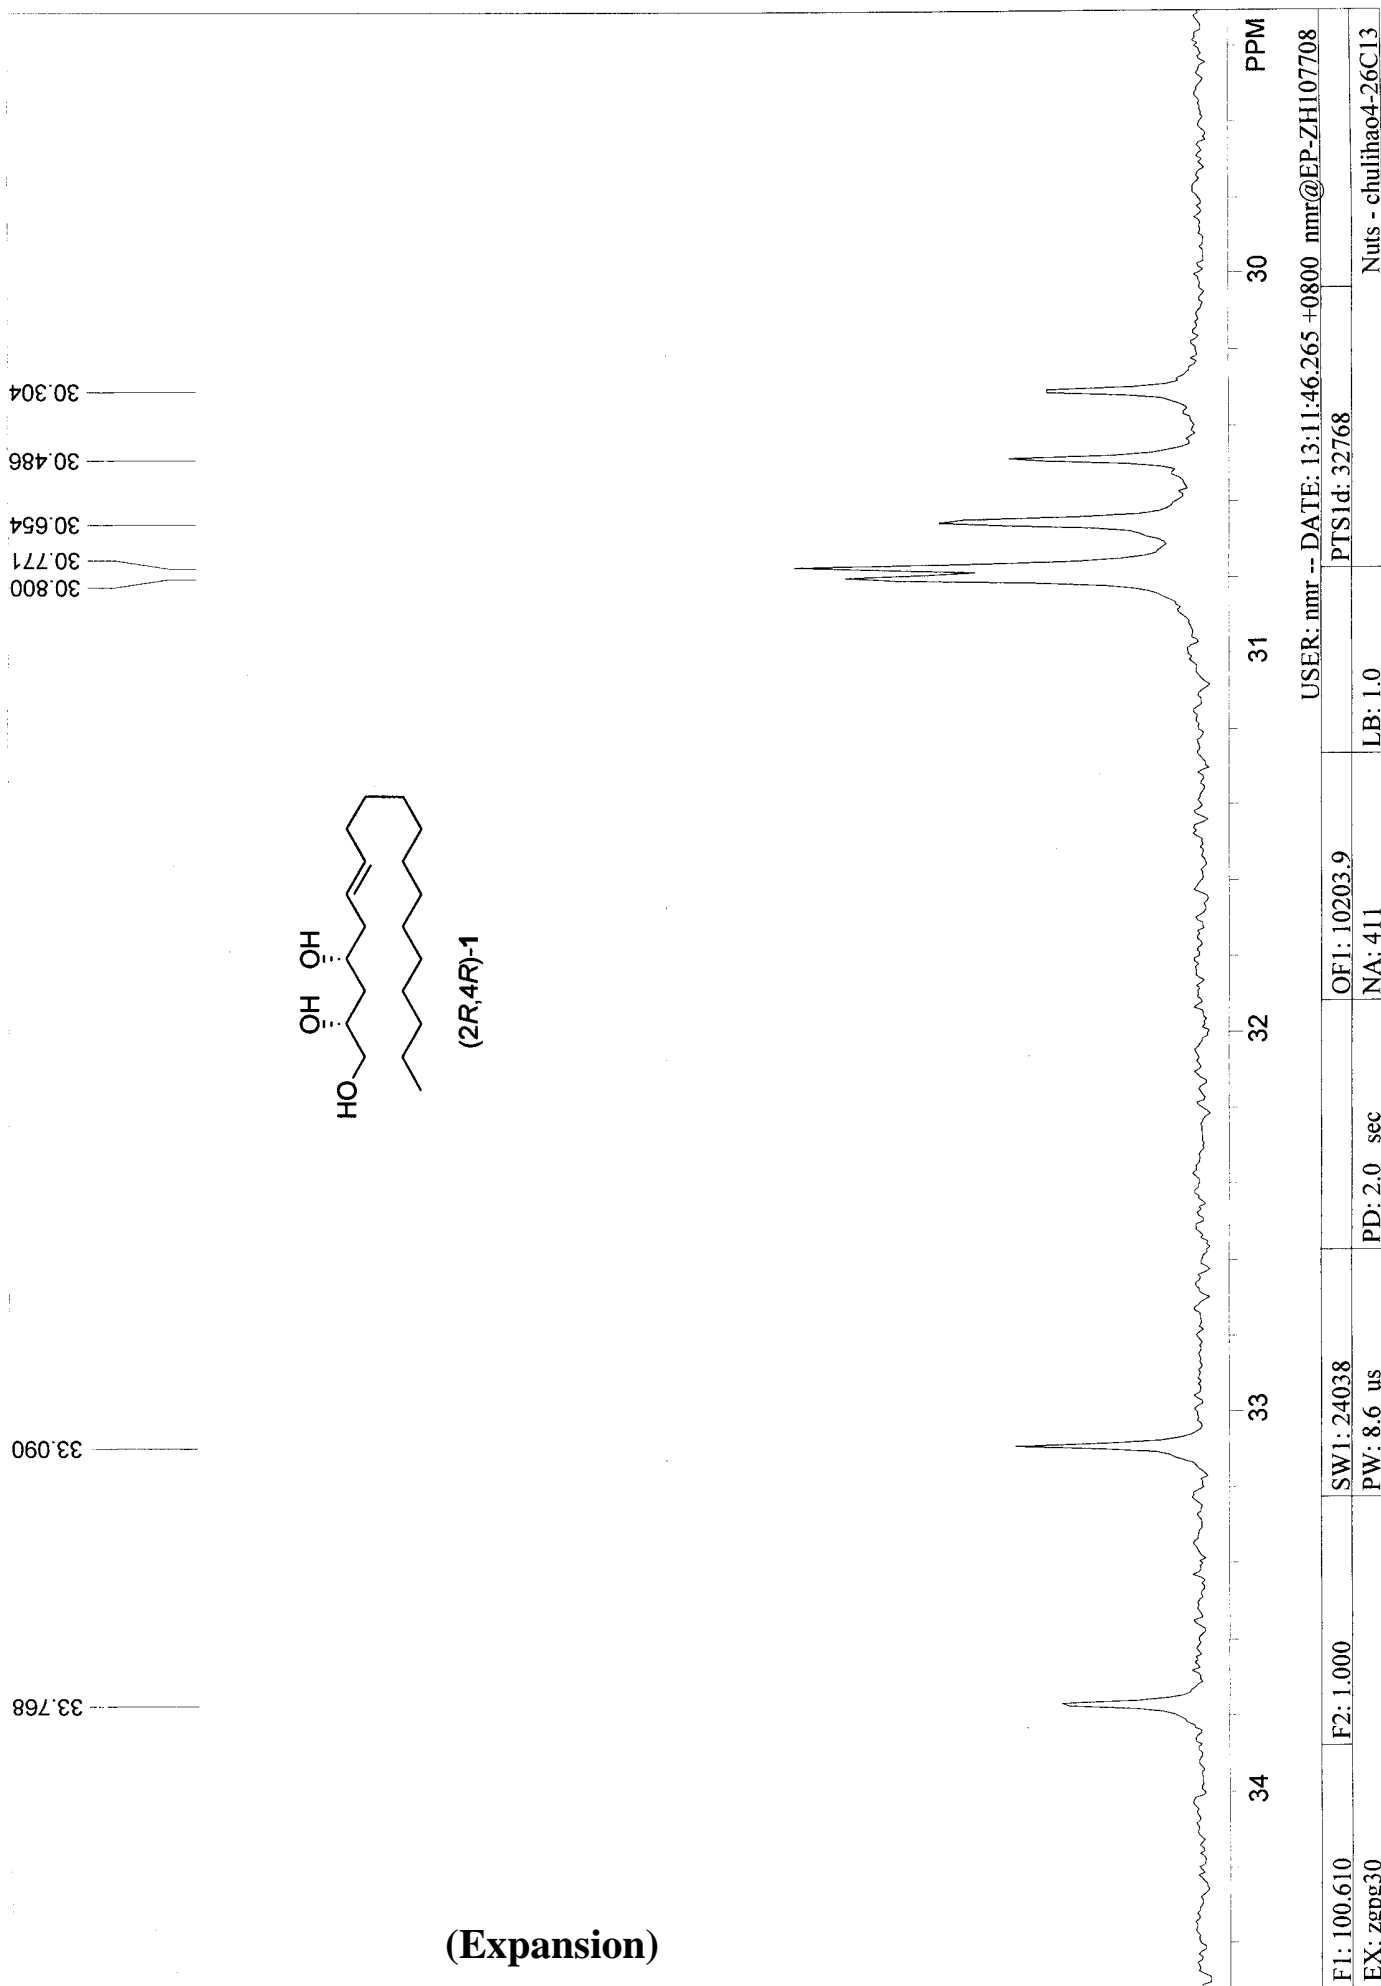

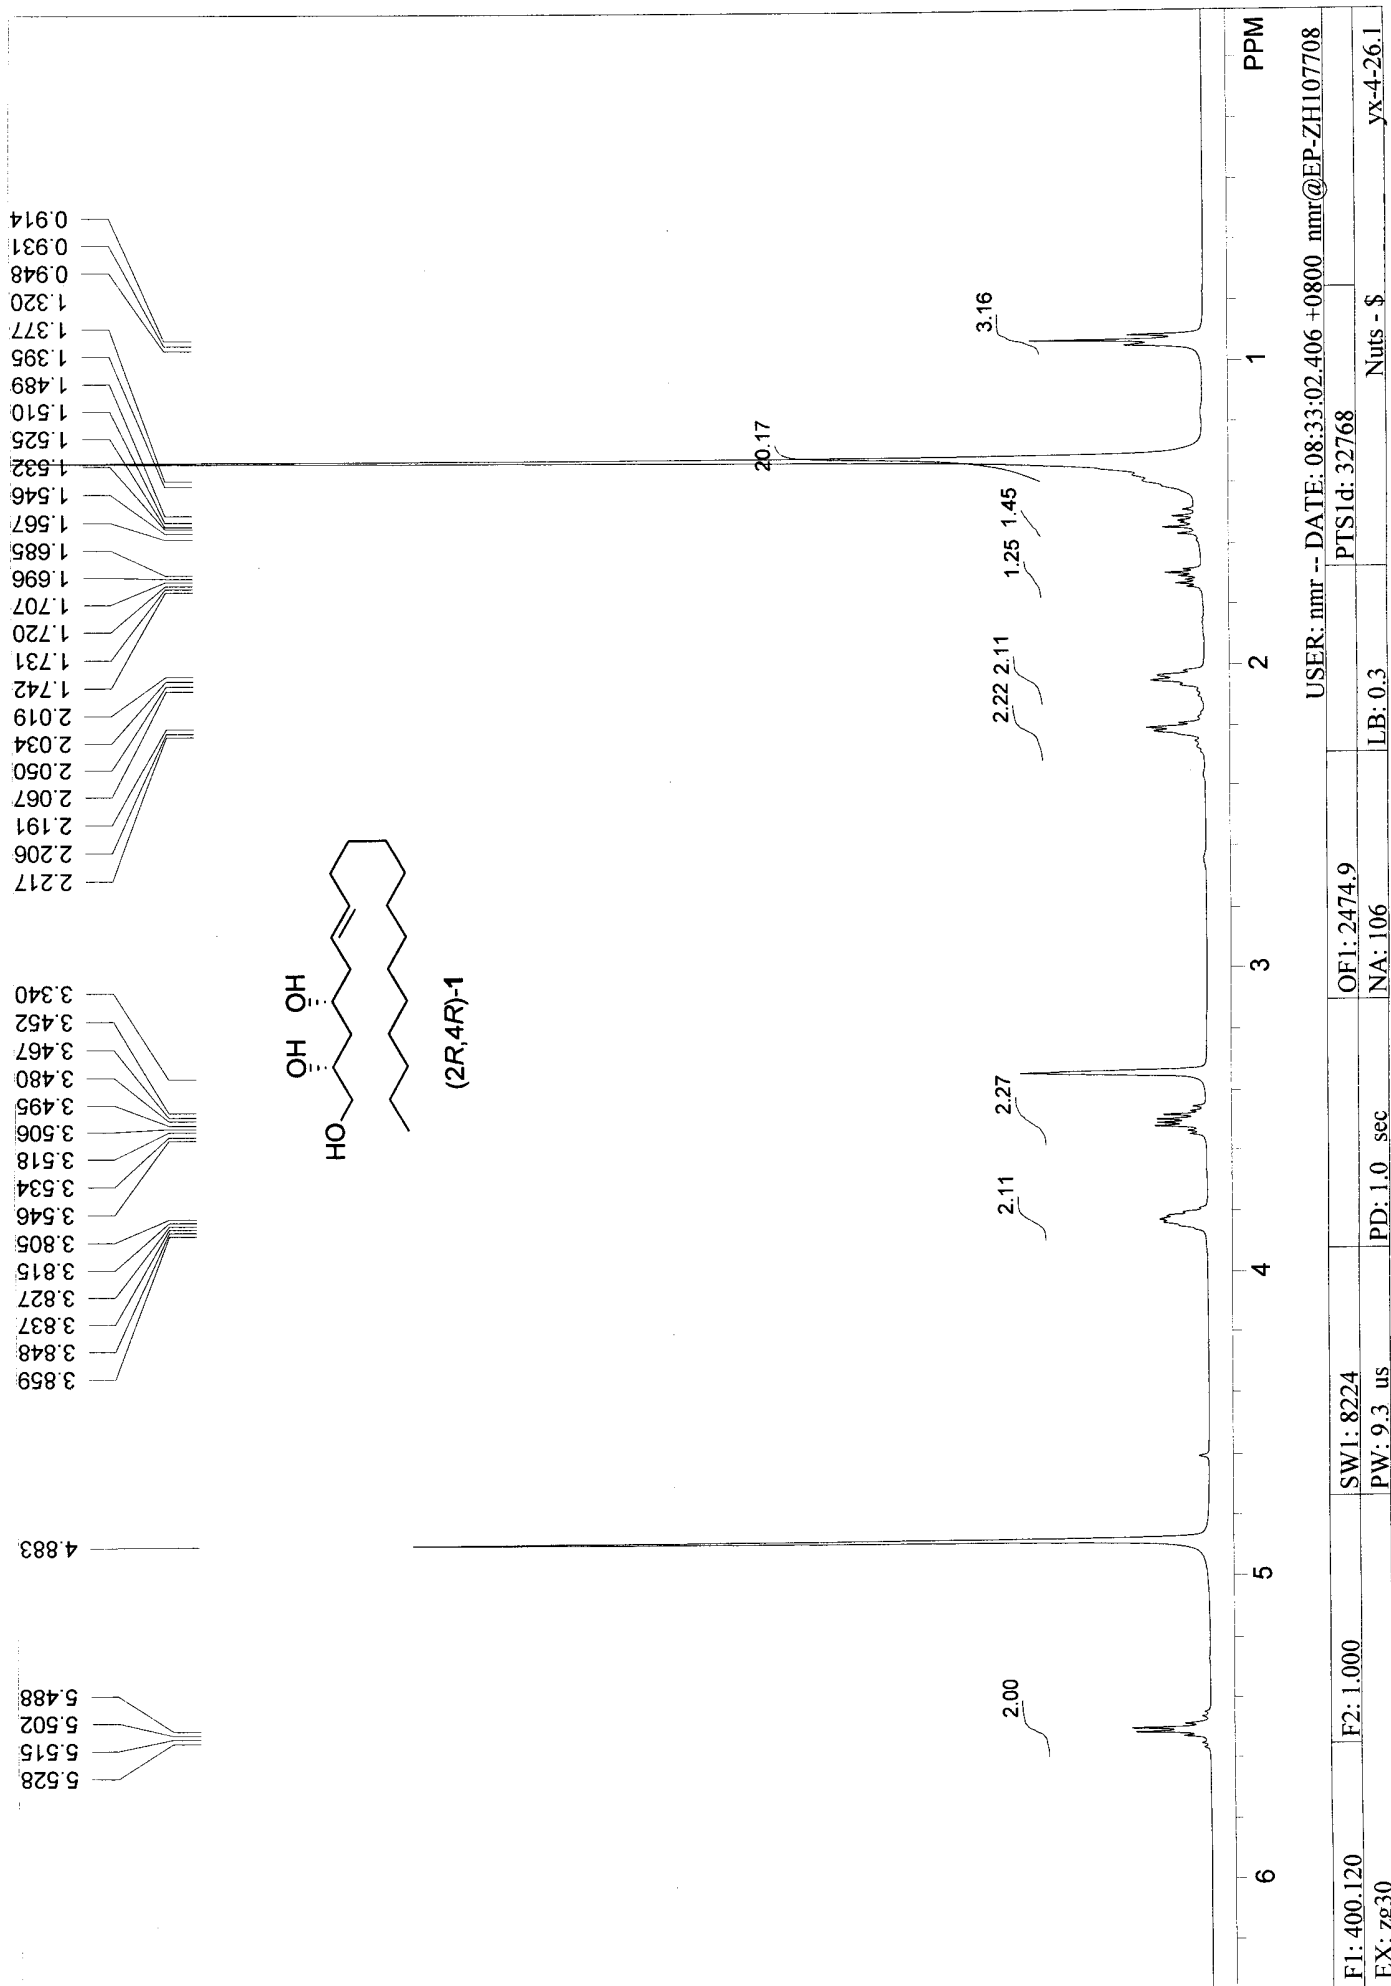

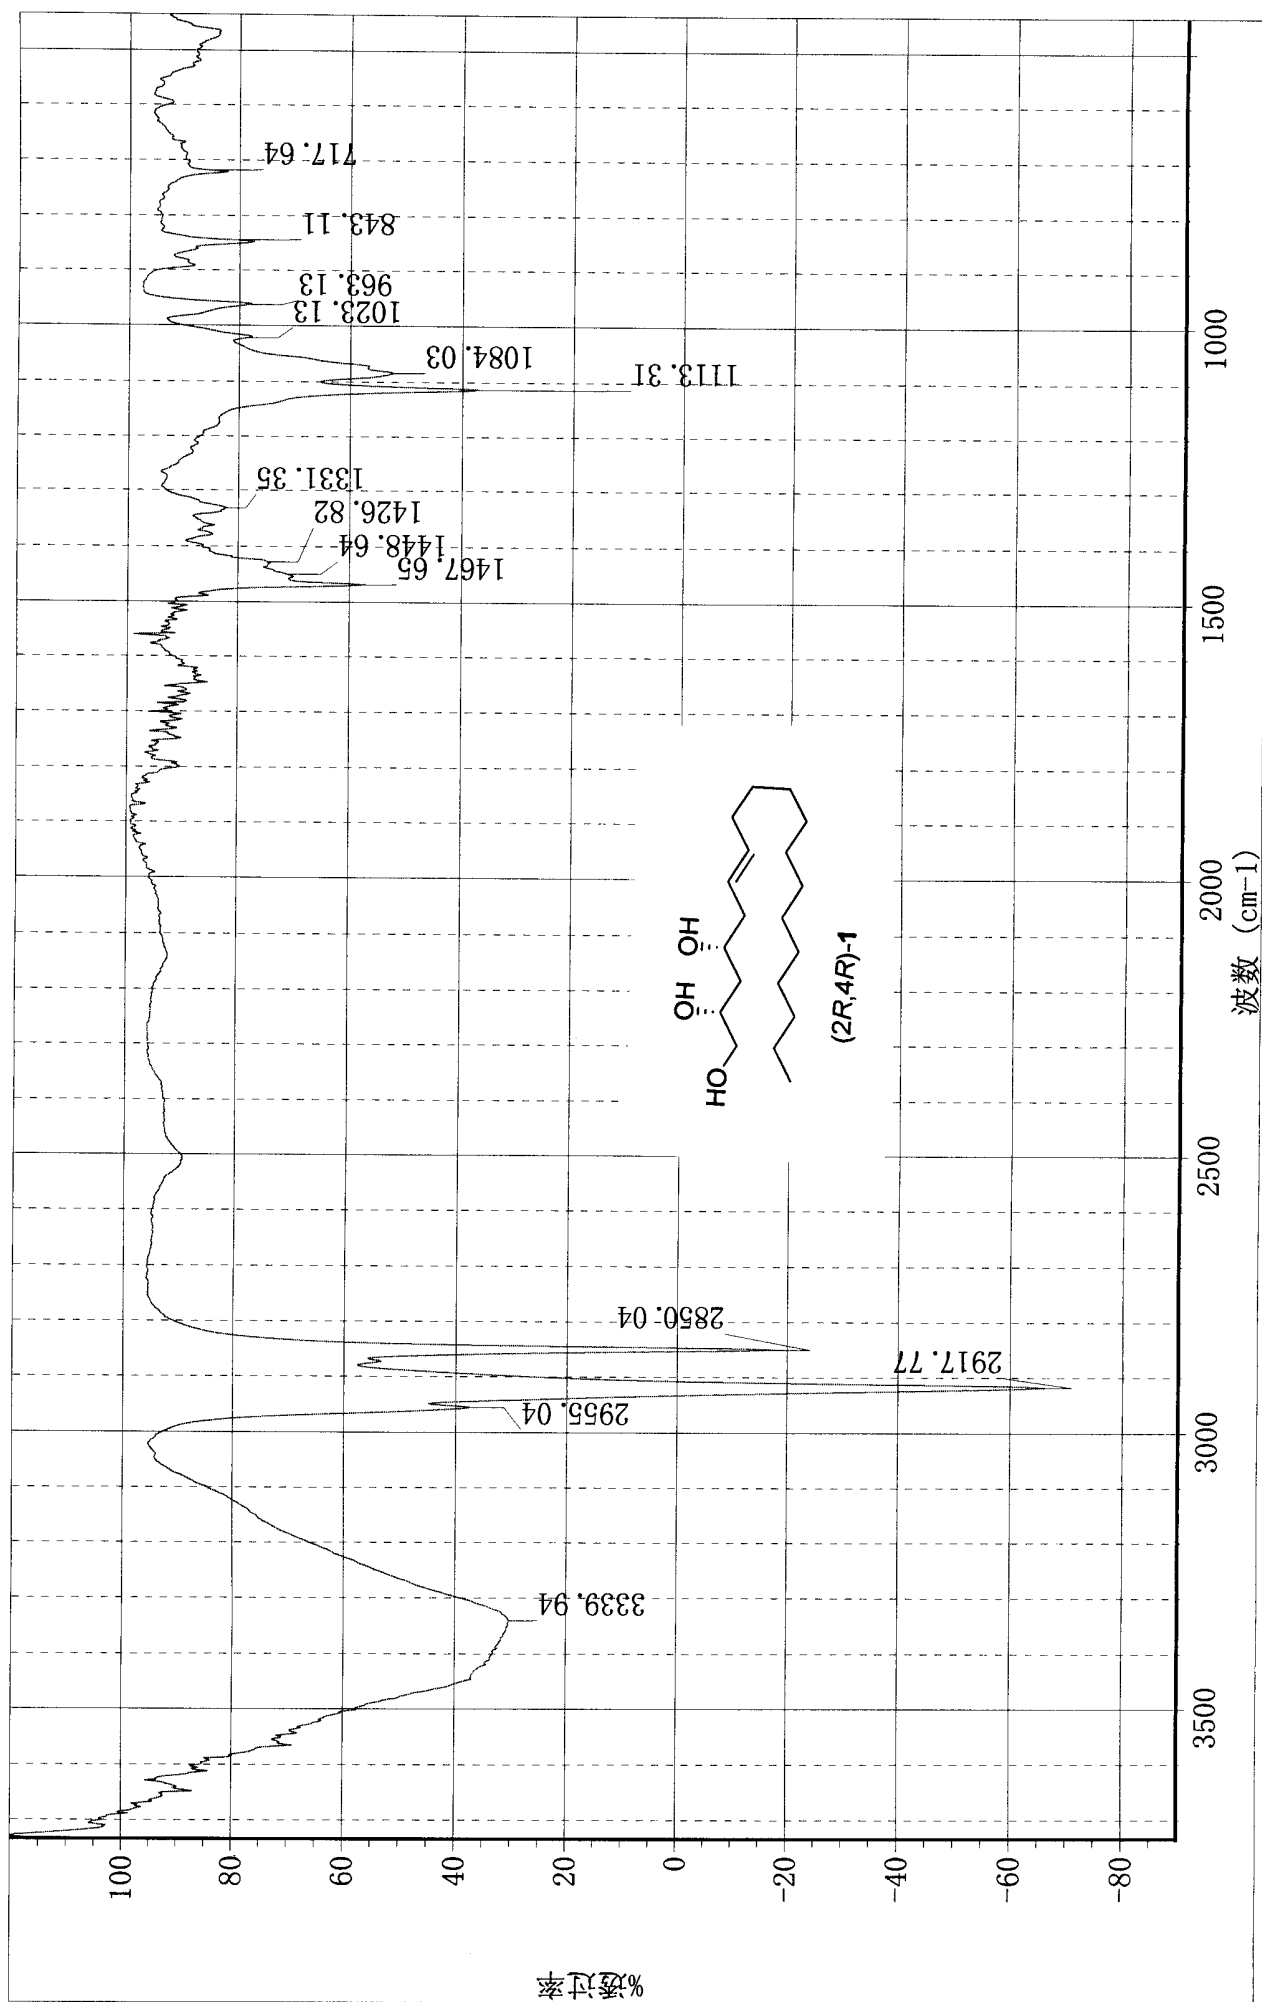

yx-4-26KBr

采集时间: 星期二 5月 31 21:56:37 2011 (GMT+08:00)

上海有机所生命有机化学国家重点实验室

Tabular data comparison between the natural **-1** and synthetic (2*R*,4*R*)-**1**

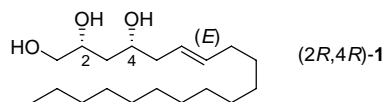

**Table S-1.** <sup>1</sup>H NMR data comparison

| Natural <b>1</b> (CD <sub>3</sub> OD, 500 MHz) <sup>a</sup> | (2 <i>R</i> ,4 <i>R</i> )- <b>1</b> (400 MHz, CD <sub>3</sub> OD) |
|-------------------------------------------------------------|-------------------------------------------------------------------|
| 5.50 (dt, <i>J</i> = 15, 6 Hz, 1H, H-7)                     | 5.52 (dt, <i>J</i> = 15.4, 6.8 Hz, 1H)                            |
| 5.45 (dt, <i>J</i> = 15, 6 Hz, 1H, H-6)                     | 5.49 (dt, <i>J</i> = 15.3, 6.0 Hz, 1H)                            |
| 3.80 (m, 1H, H-2)                                           | 3.86-3.81 (m, 2H)                                                 |
| 3.78 (m, 1H, H-4)                                           |                                                                   |
| 3.49 (dd, <i>J</i> = 11, 5 Hz, 1H, H-1b)                    | 3.55-3.45 (m, 2H)                                                 |
| 3.44 (dd, <i>J</i> = 11, 6Hz, 1H, H-1a)                     |                                                                   |
| 2.17 (m, 2H, H-5)                                           | 2.22-2.19 (m, 2H)                                                 |
| 2.01 (m, 2H, H-8)                                           | 2.07-2.02 (m, 2H)                                                 |
| 1.68 (dt, <i>J</i> = 14, 4 Hz, 1H, H-3b)                    | 1.71 (dt, <i>J</i> = 14.0, 4.4 Hz, 1H)                            |
| 1.50 (dt, <i>J</i> = 14, 8 Hz, 1H, H-3a)                    | 1.53 (dt, <i>J</i> = 14.3, 6.5 Hz, 1H)                            |
| (not given)                                                 | 1.38-1.30 (m, 20H)                                                |
| 0.9 (t, <i>J</i> = 7 Hz, 3H, H-19)                          | 0.93 (t, <i>J</i> = 6.8 Hz, 3H)                                   |

<sup>a</sup>Taken from: F. Abe, S. Nagafuji, M. Okawa, J. Kinjo, H. Akahane, T. Ogura, M. A. Martinez-Alfaro and R. Reys-Chilpa, *Biol. Parm. Bull.*, 2005, **28**, 1314. <sup>b</sup>This work.

**Table S-2.** <sup>13</sup>C NMR data comparison

| Natural <b>-1</b> (CD <sub>3</sub> OD, 500 MHz) <sup>a</sup> | (2 <i>R</i> ,4 <i>R</i> )- <b>1</b> (400 MHz, CD <sub>3</sub> OD) <sup>b</sup> |
|--------------------------------------------------------------|--------------------------------------------------------------------------------|
| 134.4 (C-6)                                                  | 134.4                                                                          |
| 127.2 (C-7)                                                  | 127.2                                                                          |
| 72.2 (C-2)                                                   | 72.1                                                                           |
| 71.3 (C-4)                                                   | 71.2                                                                           |
| 67.3 (C-1)                                                   | 67.3                                                                           |
| 41.9 (C-5)                                                   | 41.9                                                                           |
| 40.5 (C-3)                                                   | 40.5                                                                           |
| 33.7 (C-8)                                                   | 33.8                                                                           |
| 33.0 (C-17)                                                  | 33.1                                                                           |
| 30.3~30.8 (C-9 to C-16)                                      | 30.80, 30.77, 30.6, 30.5, 30.3                                                 |
| 23.3 (C-18)                                                  | 23.7                                                                           |
| 14.4 (C-19)                                                  | 14.4                                                                           |

<sup>a</sup>Taken from: F. Abe, S. Nagafuji, M. Okawa, J. Kinjo, H. Akahane, T. Ogura, M. A. Martinez-Alfaro and R. Reys-Chilpa, *Biol. Parm. Bull.*, 2005, **28**, 1314. <sup>b</sup>This work.
